# Supplementary material
Source: publisher figshare collection journal article supplement (https://acs.figshare.com/ndownloader/files/7831984)
Supplement: Supplementary file 1 [file 7831984]

## Sheet: All_mouse_peptides
Antibody	Search	Confidence	Sequence	length	Modifications	# Proteins	# PSMs	Uniprot Accession	Entry name	Protein names	Gene names	Length	Theo. MH+ [Da]	Ions Score Mascot	Confidence Mascot	q-Value Mascot	PEP Mascot	Db nM	Db Rank	Kb nM	Kb Rank	Best Allele
B22	MHC-DB	High	LMMTDHPNI	9		1	1	A0JLX3	SMK4A_MOUSE	Sperm motility kinase 4A (EC 2.7.11.1)	Smok4a	433	1071.5	12.26	High	0.008	0.06716	5259.8	1.4	3132.3	4.5	H-2 Db
B22	MHC-DB	High	YVNPNHQATL	10		1	2	A2A5R2	BIG2_MOUSE	Brefeldin A-inhibited guanine nucleotide-exchange protein 2 (Brefeldin A-inhibited GEP 2) (ADP-ribosylation factor guanine nucleotide-exchange factor 2)	Arfgef2 Arfgep2 Big2	1792	1156.57	40.53	High	0	9.725e-06	2588.1	0.7	1276.1	2.5	H-2 Db
Y3	MHC-DB	High	YAPQFASF	8		1	1	A2A7Z8	ADCL3_MOUSE	Arylacetamide deacetylase-like 3 (EC 3.1.1.-)	Aadacl3	408	930.436	21.06	High	0.003	0.003654	11722	3.5	202	0.5	H-2 Kb
Y3	MHC-DB	Medium	IVSNGFSVSL	10		1	1	A2A995	CA168_MOUSE	Uncharacterized protein C1orf168 homolog		729	1022.55	27.06	Medium	0.02	0.09212	29857.9	14	813.4	1.5	H-2 Kb
Y3	MHC-DB	Medium	QTFVFHVV	8		1	1	A2AAE1	K1109_MOUSE	Uncharacterized protein KIAA1109 (Fragile site-associated protein homolog)	Kiaa1109 Fsa Kiaa1371	5005	976.525	25.29	Medium	0.026	0.1211	28572.8	13	139.8	0.4	H-2 Kb
B22	MHC-DB	High	LSVWNQQVL	9		1	3	A2ABV5	MED14_MOUSE	Mediator of RNA polymerase II transcription subunit 14 (Cofactor required for Sp1 transcriptional activation subunit 2) (CRSP complex subunit 2) (Mediator complex subunit 14) (Thyroid hormone receptor-associated protein complex 170 kDa component) (Trap170)	Med14 Crsp2 Gm641 Trap170	1459	1086.59	43.93	High	0	0.0001108	87.4	0.06	3267.3	5	H-2 Db
B22	MHC-DB	High	RAPTGSTEL	9		1	2	A2ACJ2	FP100_MOUSE	Fanconi anemia core complex-associated protein 100 (Fanconi anemia-associated protein of 100 kDa)	Faap100	879	931.484	16.16	High	0	0.0005838	672.9	0.3	8135.9	11	H-2 Db
Y3	MHC-DB	Medium	RSMPSAEAI	9		1	1	A2AEY4	MA7D3_MOUSE	MAP7 domain-containing protein 3	Map7d3 Mdp3 Mtap7d3	876	961.477	10.99	Medium	0.022	0.09212	1777.3	0.6	10778.4	14	H-2 Db
Y3	MHC-DB	High	VSYNHTNI	8		1	2	A2AG58	CX023_MOUSE	Uncharacterized protein CXorf23 homolog		752	947.458	33.15	High	0	1.07e-15	2854.5	0.8	5.8	0.015	H-2 Kb
B22	MHC-DB	High	RQILNADAM	9		2	3	A2AIV2	VIR_MOUSE	Protein virilizer homolog	Kiaa1429	1811	1031.53	47.83	High	0	4.027e-06	5.6	0.01	9005	12	H-2 Db
B22	MHC-DB	High	RQILNADAM	9	1xOxidation [M9]	2	2	A2AIV2	VIR_MOUSE	Protein virilizer homolog	Kiaa1429	1811	1047.53	45.84	High	0	2.904e-06	5.6	0.01	9005	12	H-2 Db
Y3	MHC-DB	High	RQILNADAM	9		2	1	A2AIV2	VIR_MOUSE	Protein virilizer homolog	Kiaa1429	1811	1031.53	30.99	High	0	1.95e-07	5.6	0.01	9005	12	H-2 Db
B22	MHC-DB	High	VSLEDQAPYV	10		1	3	A2AJ76	HMCN2_MOUSE	Hemicentin-2	Hmcn2	5100	1120.55	28.85	High	0	0.0006856	3751	1	7845.1	10	H-2 Db
Y3	MHC-DB	High	MGILRSNL	8		1	1	A2AJB1	CC183_MOUSE	Coiled-coil domain-containing protein 183	Ccdc183 Kiaa1984	534	903.508	21.95	High	0.007	0.02739	33521.6	18	234.4	0.6	H-2 Kb
Y3	MHC-DB	High	RVLIFSQM	8	1xOxidation [M8]	2	8	A2AJK6	CHD7_MOUSE	Chromodomain-helicase-DNA-binding protein 7 (CHD-7) (EC 3.6.4.12) (ATP-dependent helicase CHD7)	Chd7	2986	1009.55	31.36	High	0	9.98e-16	25851.9	11	42.3	0.125	H-2 Kb
Y3	MHC-DB	High	RVLIFSQM	8		2	6	A2AJK6	CHD7_MOUSE	Chromodomain-helicase-DNA-binding protein 7 (CHD-7) (EC 3.6.4.12) (ATP-dependent helicase CHD7)	Chd7	2986	993.555	31.06	High	0	0.0005294	25851.9	11	42.3	0.125	H-2 Kb
Y3	MHC-DB	High	VRVTFQHL	8		1	2	A2AKB4	FRPD1_MOUSE	FERM and PDZ domain-containing protein 1	Frmpd1 Kiaa0967	1549	999.573	16.2	High	0.003	0.02088	31972.4	16	67.8	0.2	H-2 Kb
B22	MHC-DB	High	VSPRNSLEVL	10		1	3	A2AKB9	DCA10_MOUSE	DDB1- and CUL4-associated factor 10 (WD repeat-containing protein 32)	Dcaf10 Wdr32	566	1113.63	22.64	High	0.001	0.008359	99.8	0.06	4910.4	6.5	H-2 Db
B22	MHC-DB	High	SQLENKTII	9		1	3	A2AKX3	SETX_MOUSE	Probable helicase senataxin (EC 3.6.4.-) (Amyotrophic lateral sclerosis 4 protein homolog) (SEN1 homolog)	Setx Als4 Kiaa0625	2646	1045.59	62.12	High	0	6.5e-07	11.7	0.01	8838.5	12	H-2 Db
Y3	MHC-DB	High	VGLLYRLL	8		1	2	A2AKX3	SETX_MOUSE	Probable helicase senataxin (EC 3.6.4.-) (Amyotrophic lateral sclerosis 4 protein homolog) (SEN1 homolog)	Setx Als4 Kiaa0625	2646	946.608	30.99	High	0	9.98e-16	30110.6	14	5.3	0.015	H-2 Kb
Y3	MHC-DB	Medium	MAPQIKVTTL	10		1	1	A2AM05	CNTLN_MOUSE	Centlein (Centrosomal protein)	Cntln	1397	1101.63	13.72	Medium	0.029	0.226	2504.9	0.7	8552.9	11	H-2 Db
B22	MHC-DB	High	TAVRNGFHSL	10		1	1	A2AN08	UBR4_MOUSE	E3 ubiquitin-protein ligase UBR4 (EC 6.3.2.-) (N-recognin-4) (Zinc finger UBR1-type protein 1) (p600)	Ubr4 Kiaa0462 Zubr1	5180	1101.58	15.21	High	0	0.004653	132.6	0.08	2637.5	4	H-2 Db
B22	MHC-DB	High	VVVENITLM	9		1	1	A2AN08	UBR4_MOUSE	E3 ubiquitin-protein ligase UBR4 (EC 6.3.2.-) (N-recognin-4) (Zinc finger UBR1-type protein 1) (p600)	Ubr4 Kiaa0462 Zubr1	5180	1017.56	34.57	High	0	0.0003602	95.4	0.06	567.2	1.2	H-2 Db
Y3	MHC-DB	High	AGYMYTQL	8		1	2	A2AN08	UBR4_MOUSE	E3 ubiquitin-protein ligase UBR4 (EC 6.3.2.-) (N-recognin-4) (Zinc finger UBR1-type protein 1) (p600)	Ubr4 Kiaa0462 Zubr1	5180	946.434	24.88	High	0.003	0.000932	15549.7	5	3.1	0.01	H-2 Kb
Y3	MHC-DB	Medium	AGYMYTQL	8	1xOxidation [M4]	1	1	A2AN08	UBR4_MOUSE	E3 ubiquitin-protein ligase UBR4 (EC 6.3.2.-) (N-recognin-4) (Zinc finger UBR1-type protein 1) (p600)	Ubr4 Kiaa0462 Zubr1	5180	962.429	19.15	Medium	0.023	0.09919	15549.7	5	3.1	0.01	H-2 Kb
Y3	MHC-DB	Medium	VSVVLQNQF	9		1	1	A2ARM1	PATL2_MOUSE	Protein PAT1 homolog 2 (PAT1-like protein 2) (Protein PAT1 homolog a) (Pat1a)	Patl2	529	1033.57	11.47	Medium	0.041	0.3489	9898.7	3	780.7	1.5	H-2 Kb
Y3	MHC-DB	Medium	FTCQNGQCI	9		1	1	A2ARV4	LRP2_MOUSE	Low-density lipoprotein receptor-related protein 2 (LRP-2) (Glycoprotein 330) (gp330) (Megalin)	Lrp2	4660	1013.42	19.14	Medium	0.041	0.3489	1153.7	0.4	25840.4	38	H-2 Db
B22	MHC-DB	Medium	HNLTSLVVL	9		1	1	A2ARZ3	FSIP2_MOUSE	Fibrous sheath-interacting protein 2	Fsip2	6995	995.588	11.42	Medium	0.027	0.1838	6020.9	1.6	4035	5.5	H-2 Db
B22	MHC-DB	Medium	VAYTCKEGYTL	11		1	1	A2AVA0	SVEP1_MOUSE	Sushi, von Willebrand factor type A, EGF and pentraxin domain-containing protein 1 (Polydom)	Svep1	3567	1247.6	14.64	Medium	0.016	0.1258	2953.8	0.8	1593.8	3	H-2 Db
B22	MHC-DB	High	TGPENSNTDTL	11		1	3	A2AWL7	MGAP_MOUSE	MAX gene-associated protein	Mga Kiaa4252	3003	1148.51	31.1	High	0	0.0004197	621.1	0.25	28746.2	45	H-2 Db
Y3	MHC-DB	High	SNLKYILV	8		1	2	A2AWL7	MGAP_MOUSE	MAX gene-associated protein	Mga Kiaa4252	3003	949.572	35.22	High	0.002	0.000932	37260	24	44.9	0.15	H-2 Kb
Y3	MHC-DB	High	ALVRFVNL	8		2	2	A2BE28	LAS1L_MOUSE	Ribosomal biogenesis protein LAS1L (Protein LAS1 homolog)	Las1l	776	931.572	28.01	High	0.003	0.003654	28754	13	39.5	0.125	H-2 Kb
Y3	MHC-DB	Medium	SSIRGSQTL	9		1	1	A2RRY8	SPAS1_MOUSE	Spermatogenesis-associated serine-rich protein 1 (Dvl2-DEP domain-interacting protein)	Spats1 Ddip	269	948.511	20.45	Medium	0.014	0.02739	476.1	0.2	796.8	1.5	H-2 Db
B22	MHC-DB	Medium	VLQNMLDL	8		1	1	A2RSJ4	UH1BL_MOUSE	UHRF1-binding protein 1-like	Uhrf1bp1l Kiaa0701	1457	945.507	12.82	Medium	0.045	0.2724	7259.8	1.9	6866.8	9	H-2 Db
B22	MHC-DB	Medium	ISYGLSFNM	9	1xOxidation [M9]	1	1	A2RSQ1	GLBL3_MOUSE	Beta-galactosidase-1-like protein 3 (EC 3.2.1.-)	Glb1l3	649	1047.48	11.07	Medium	0.017	0.1317	8057.1	2.5	40.6	0.125	H-2 Kb
Y3	MHC-DB	High	KNFVYRTL	8		1	2	A2RSX7	TYW5_MOUSE	tRNA wybutosine-synthesizing protein 5 (EC 1.14.11.42) (tRNA(Phe) (7-(3-amino-3-carboxypropyl)wyosine(37)-C(2))-hydroxylase)	Tyw5	315	1040.59	37.53	High	0	9.98e-16	27699.5	12	5.9	0.015	H-2 Kb
B22	MHC-DB	Medium	LIVTNAHVL	9		1	1	A2RT60	HTRA4_MOUSE	Serine protease HTRA4 (EC 3.4.21.-) (High-temperature requirement factor A4)	Htra4	483	979.594	11.17	Medium	0.023	0.1643	370.8	0.175	6558.7	8.5	H-2 Db
B22	MHC-DB	Medium	LIYVMLVL	8	1xOxidation [M5]	1	1	A2RTF1	CTSRB_MOUSE	Cation channel sperm-associated protein subunit beta (CatSper-beta)	Catsperb	1109	979.59	11.71	Medium	0.049	0.286	19107.7	6.5	296.5	0.7	H-2 Kb
B22	MHC-DB	High	GQIVNGSL	8		1	3	A3KFM7	CHD6_MOUSE	Chromodomain-helicase-DNA-binding protein 6 (CHD-6) (EC 3.6.4.12) (ATP-dependent helicase CHD6)	Chd6 Kiaa1335	2711	787.431	27.91	High	0.001	0.006178	3641.4	1	21231.7	29	H-2 Db
Y3	MHC-DB	Medium	GQIVNGSL	8		1	1	A3KFM7	CHD6_MOUSE	Chromodomain-helicase-DNA-binding protein 6 (CHD-6) (EC 3.6.4.12) (ATP-dependent helicase CHD6)	Chd6 Kiaa1335	2711	787.431	32.37	Medium	0.023	0.0991	3641.4	1	21231.7	29	H-2 Db
Y3	MHC-DB	Medium	QSILKPMML	9	1xOxidation [M7]	1	1	A3KFM7	CHD6_MOUSE	Chromodomain-helicase-DNA-binding protein 6 (CHD-6) (EC 3.6.4.12) (ATP-dependent helicase CHD6)	Chd6 Kiaa1335	2711	1076.58	22.25	Medium	0.022	0.09212	21945	8	377	0.9	H-2 Kb
Y3	MHC-DB	High	TAFRFSEL	8		1	2	A3KGB4	TBC8B_MOUSE	TBC1 domain family member 8B	Tbc1d8b	1114	970.499	33.89	High	0	4.185e-05	14542.8	4.5	3.3	0.01	H-2 Kb
B22	MHC-DB	High	TQPLNHYFI	9		2	2	A3KGF7	PLCB2_MOUSE	1-phosphatidylinositol 4,5-bisphosphate phosphodiesterase beta-2 (EC 3.1.4.11) (Phosphoinositide phospholipase C-beta-2) (Phospholipase C-beta-2) (PLC-beta-2)	Plcb2	1181	1132.58	24.73	High	0	0.001002	18.5	0.01	5913.1	8	H-2 Db
B22	MHC-DB	High	RSMQNYVQFL	10		1	4	A3KGV1	ODFP2_MOUSE	Outer dense fiber protein 2 (84 kDa outer dense fiber protein) (Cenexin) (Outer dense fiber of sperm tails protein 2)	Odf2 Odf84	830	1285.64	31.32	High	0	6.386e-05	27.2	0.02	735.3	1.4	H-2 Db
B22	MHC-DB	High	TSAQNVEFL	9		1	3	A3KGV1	ODFP2_MOUSE	Outer dense fiber protein 2 (84 kDa outer dense fiber protein) (Cenexin) (Outer dense fiber of sperm tails protein 2)	Odf2 Odf84	830	1008.5	25.72	High	0	0.00122	31.8	0.025	9110.5	12	H-2 Db
B22	MHC-DB	Medium	FSMPMSFI	8	1xOxidation [M3]	1	1	A4FUQ5	FPRS4_MOUSE	Formyl peptide receptor-related sequence 4 (N-formylpeptide receptor-like 4)	Fpr-rs4	323	975.431	14.78	Medium	0.046	0.2743	5626.3	1.5	3638.7	5.5	H-2 Db
Y3	MHC-DB	High	VALDFEQEM	9		1	1	A5A3E0	POTEF_HUMAN	POTE ankyrin domain family member F (ANKRD26-like family C member 1B) (Chimeric POTE-actin protein)	POTEF A26C1B	1075	1081.49	39.47	High	0.002	0.000932	10354	3	87.5	0.25	H-2 Kb
Y3	MHC-DB	High	VALDFEQEM	9	1xOxidation [M9]	1	2	A5A3E0	POTEF_HUMAN	POTE ankyrin domain family member F (ANKRD26-like family C member 1B) (Chimeric POTE-actin protein)	POTEF A26C1B	1075	1097.48	29.22	High	0.003	0.003654	10354	3	87.5	0.25	H-2 Kb
B22	MHC-DB	High	QIIINTTHL	9		1	2	A6H5Z3	EXC6B_MOUSE	Exocyst complex component 6B (Exocyst complex component Sec15B) (SEC15-like protein 2)	Exoc6b Sec15b Sec15l2	810	1052.61	16.22	High	0	0.001932	777.3	0.3	999.3	1.8	H-2 Db
B22	MHC-DB	High	SQLPLLSTI	9		1	7	A6PWY4	WDR76_MOUSE	WD repeat-containing protein 76	Wdr76	622	971.577	48.7	High	0	1.041e-05	607	0.25	2359.1	3.5	H-2 Db
B22	MHC-DB	High	FSPTNPAHL	9		1	4	A6PWY4	WDR76_MOUSE	WD repeat-containing protein 76	Wdr76	622	983.495	35.07	High	0	0.0004616	12.6	0.01	547.8	1.1	H-2 Db
B22	MHC-DB	High	VSNINLIPL	9		1	1	A7TZF3	SKIT4_MOUSE	Selection and upkeep of intraepithelial T-cells protein 4 (Skint-4)	Skint4	474	982.593	12.41	High	0.007	0.06397	20.2	0.015	144.8	0.4	H-2 Db
B22	MHC-DB	High	SLLQLEWHI	9		1	1	A8C756	THADA_MOUSE	Thyroid adenoma-associated protein homolog	Thada Kiaa1767	1938	1138.63	33.36	High	0	5.202e-05	3263.4	0.9	14632.5	19	H-2 Db
B22	MHC-DB	High	ASVVNLLKDVL	11		1	1	A8C756	THADA_MOUSE	Thyroid adenoma-associated protein homolog	Thada Kiaa1767	1938	1170.71	14.75	High	0	0.001641	49.8	0.04	11481.6	15	H-2 Db
B22	MHC-DB	High	FSSVSANASYL	11		1	3	A8E0Y8	IGSF2_MOUSE	Immunoglobulin superfamily member 2 (IgSF2) (Glu-Trp-Ile EWI motif-containing protein 101) (EWI-101) (CD antigen CD101)	Cd101 Igsf2	1033	1145.55	18.47	High	0.008	0.06784	60.1	0.04	10806	14	H-2 Db
B22	MHC-DB	High	YQGPGGLLDYI	11		1	1	A8Y5H7	S14L1_MOUSE	SEC14-like protein 1	Sec14l1 Kiaa4251	715	1195.6	11.2	High	0	0.002648	7153.4	1.8	36655.8	70	H-2 Db
Y3	MHC-DB	Medium	VMMTDAAL	8	2xOxidation [M2; M3]	1	1	B1AS29	GRIK3_MOUSE	Glutamate receptor ionotropic, kainate 3 (GluK3) (Glutamate receptor 7) (GluR-7) (GluR7)	Grik3 Glur7	919	883.39	16.64	Medium	0.016	0.06603	14753.3	4.5	172.5	0.5	H-2 Kb
B22	MHC-DB	High	SLGTNRDDL	9		1	1	B1AVY7	KI16B_MOUSE	Kinesin-like protein KIF16B	Kif16b Kiaa1590	1312	990.485	19.02	High	0	0.00108	2368.9	0.7	16767.7	22	H-2 Db
Y3	MHC-DB	Medium	KVLLMYPI	8	1xOxidation [M5]	1	1	B1AVZ0	UPP_MOUSE	Uracil phosphoribosyltransferase homolog	Uprt	310	992.585	13.13	Medium	0.039	0.3489	7501.8	1.9	1478	2.5	H-2 Db
B22	MHC-DB	High	SSIRNFLIYV	10		1	5	B1AXP6	TOM5_MOUSE	Mitochondrial import receptor subunit TOM5 homolog	Tomm5 Tom5	51	1211.68	22.67	High	0	0.001723	17.5	0.01	338.8	0.8	H-2 Db
Y3	MHC-DB	High	SSIRNFLIYV	10		1	3	B1AXP6	TOM5_MOUSE	Mitochondrial import receptor subunit TOM5 homolog	Tomm5 Tom5	51	1211.68	22.77	High	0	2.19e-11	17.5	0.01	338.8	0.8	H-2 Db
B22	MHC-DB	High	SSPSNLQII	9		1	2	B1AY13	UBP24_MOUSE	Ubiquitin carboxyl-terminal hydrolase 24 (EC 3.4.19.12) (Deubiquitinating enzyme 24) (Ubiquitin thioesterase 24) (Ubiquitin-specific-processing protease 24)	Usp24	2617	958.52	37.43	High	0.002	0.01588	11.5	0.01	3162.3	4.5	H-2 Db
Y3	MHC-DB	High	INYSYINL	8		1	1	B1AY13	UBP24_MOUSE	Ubiquitin carboxyl-terminal hydrolase 24 (EC 3.4.19.12) (Deubiquitinating enzyme 24) (Ubiquitin thioesterase 24) (Ubiquitin-specific-processing protease 24)	Usp24	2617	999.515	29.47	High	0	9.98e-16	25004.6	9.5	1.9	0.01	H-2 Kb
B22	MHC-DB	High	AAITNKYQLVF	11		1	1	B2RS91	RRN3_MOUSE	RNA polymerase I-specific transcription initiation factor RRN3	Rrn3	656	1267.7	23.66	High	0.001	0.008136	373.9	0.175	4988.2	7	H-2 Db
B22	MHC-DB	High	AAITNKYQL	9		1	3	B2RS91	RRN3_MOUSE	RNA polymerase I-specific transcription initiation factor RRN3	Rrn3	656	1021.57	42.32	High	0	4.928e-05	7.2	0.01	1423.2	2.5	H-2 Db
Y3	MHC-DB	High	AAITNKYQL	9		1	3	B2RS91	RRN3_MOUSE	RNA polymerase I-specific transcription initiation factor RRN3	Rrn3	656	1021.57	41.14	High	0	9.98e-16	7.2	0.01	1423.2	2.5	H-2 Db
B22	MHC-DB	High	SQGMNVTNM	9	1xOxidation [M]	1	4	B2RWS6	EP300_MOUSE	Histone acetyltransferase p300 (p300 HAT) (EC 2.3.1.48) (E1A-associated protein p300)	Ep300 P300	2412	997.408	43.88	High	0	1.598e-05	55.4	0.04	4639.3	6.5	H-2 Db
B22	MHC-DB	High	SQGMNVTNM	9		1	2	B2RWS6	EP300_MOUSE	Histone acetyltransferase p300 (p300 HAT) (EC 2.3.1.48) (E1A-associated protein p300)	Ep300 P300	2412	981.413	37.07	High	0	6.519e-06	55.4	0.04	4639.3	6.5	H-2 Db
B22	MHC-DB	High	SQGMNVTNM	9	2xOxidation [M4; M9]	1	2	B2RWS6	EP300_MOUSE	Histone acetyltransferase p300 (p300 HAT) (EC 2.3.1.48) (E1A-associated protein p300)	Ep300 P300	2412	1013.4	18.42	High	0	0.002166	55.4	0.04	4639.3	6.5	H-2 Db
Y3	MHC-DB	Medium	RAVVSIDQNL	10		1	1	B2RX88	CSPP1_MOUSE	Centrosome and spindle pole associated protein 1	Cspp1 Cspp	1205	1114.62	10.27	Medium	0.043	0.3489	4393	1.2	13887	18	H-2 Db
B22	MHC-DB	High	KALKLLDYV	9		1	2	B2RXC1	TPC11_MOUSE	Trafficking protein particle complex subunit 11	Trappc11	1133	1062.66	35.16	High	0	0.0001793	92.7	0.06	3107.7	4.5	H-2 Db
Y3	MHC-DB	High	VSTKFEHL	8		1	2	B2RXC1	TPC11_MOUSE	Trafficking protein particle complex subunit 11	Trappc11	1133	960.515	36.95	High	0.002	0.000932	23005.6	8.5	13.1	0.04	H-2 Kb
B22	MHC-DB	High	SSPANLNAM	9	1xOxidation [M9]	1	2	B2RXC5	ZN382_MOUSE	Zinc finger protein 382 (KRAB/zinc finger suppressor protein 1) (KS1) (Multiple zinc finger and krueppel-associated box protein KS1)	Znf382 Zfp382	579	920.414	50	High	0	1.513e-05	7.6	0.01	1524.3	2.5	H-2 Db
B22	MHC-DB	High	SSPANLNAM	9		1	1	B2RXC5	ZN382_MOUSE	Zinc finger protein 382 (KRAB/zinc finger suppressor protein 1) (KS1) (Multiple zinc finger and krueppel-associated box protein KS1)	Znf382 Zfp382	579	904.419	28.12	High	0.001	0.006814	7.6	0.01	1524.3	2.5	H-2 Db
Y3	MHC-DB	High	VQFLYREL	8		1	2	B9EJR8	DAAF5_MOUSE	Dynein assembly factor 5, axonemal (HEAT repeat-containing protein 2)	Dnaaf5 Heatr2	853	1067.59	41.28	High	0	9.98e-16	15729.4	5	5.5	0.015	H-2 Kb
B22	MHC-DB	High	FSITDQQTL	9		1	3	C3VPR6	NLRC5_MOUSE	Protein NLRC5	Nlrc5	1915	1052.53	44.43	High	0	8.99e-07	54.3	0.04	6427.1	8.5	H-2 Db
Y3	MHC-DB	High	FSITDQQTL	9		1	1	C3VPR6	NLRC5_MOUSE	Protein NLRC5	Nlrc5	1915	1052.53	31.27	High	0	6.61e-15	54.3	0.04	6427.1	8.5	H-2 Db
Y3	MHC-DB	High	IGYAFVHL	8		1	1	C3VPR6	NLRC5_MOUSE	Protein NLRC5	Nlrc5	1915	919.504	20.42	High	0.004	0.02296	11826.7	3.5	2.3	0.01	H-2 Kb
Y3	MHC-DB	Medium	LIFLKMNL	8		1	1	D2EAC2	ZBED6_MOUSE	Zinc finger BED domain-containing protein 6 (Muscle growth regulator) (MGR)	Zbed6	980	991.601	10.47	Medium	0.043	0.3489	33033	17	45.6	0.15	H-2 Kb
B22	MHC-DB	Medium	AQLLCTQII	9		1	1	D3YU32	TX13C_MOUSE	Testis-expressed sequence 13C protein	Tex13c Gm362	604	1002.57	20.41	Medium	0.048	0.2853	3458	0.9	11054.4	14	H-2 Db
Y3	MHC-DB	High	SVVSFDKV	8		1	1	D3YXK2	SAFB1_MOUSE	Scaffold attachment factor B1 (SAF-B1)	Safb Safb1	937	880.478	18.35	High	0.005	0.02588	27583.8	12	752.5	1.5	H-2 Kb
B22	MHC-DB	High	NQLALIEEL	9		1	2	E9PVA8	GCN1_MOUSE	eIF-2-alpha kinase activator GCN1 (GCN1 eIF-2-alpha kinase activator homolog) (GCN1-like protein 1) (General control of amino-acid synthesis 1-like protein 1) (Translational activator GCN1)	Gcn1 Gcn1l1	2671	1042.58	34.89	High	0	1.314e-06	1890.7	0.6	20488.8	28	H-2 Db
B22	MHC-DB	High	RSPENVIETI	10		1	5	E9PVA8	GCN1_MOUSE	eIF-2-alpha kinase activator GCN1 (GCN1 eIF-2-alpha kinase activator homolog) (GCN1-like protein 1) (General control of amino-acid synthesis 1-like protein 1) (Translational activator GCN1)	Gcn1 Gcn1l1	2671	1157.62	27.24	High	0	0.000192	49.2	0.04	25304.2	37	H-2 Db
B22	MHC-DB	High	QSPLNQSSM	9	1xOxidation [M9]	1	1	E9PVA8	GCN1_MOUSE	eIF-2-alpha kinase activator GCN1 (GCN1 eIF-2-alpha kinase activator homolog) (GCN1-like protein 1) (General control of amino-acid synthesis 1-like protein 1) (Translational activator GCN1)	Gcn1 Gcn1l1	2671	1007.45	33.25	High	0	0.001166	90.7	0.06	2816.5	4.5	H-2 Db
B22	MHC-DB	High	QSPLNQSSM	9		1	1	E9PVA8	GCN1_MOUSE	eIF-2-alpha kinase activator GCN1 (GCN1 eIF-2-alpha kinase activator homolog) (GCN1-like protein 1) (General control of amino-acid synthesis 1-like protein 1) (Translational activator GCN1)	Gcn1 Gcn1l1	2671	991.451	11.31	High	0	0.004021	90.7	0.06	2816.5	4.5	H-2 Db
Y3	MHC-DB	High	VQQYYRVL	8		1	1	E9PVA8	GCN1_MOUSE	eIF-2-alpha kinase activator GCN1 (GCN1 eIF-2-alpha kinase activator homolog) (GCN1-like protein 1) (General control of amino-acid synthesis 1-like protein 1) (Translational activator GCN1)	Gcn1 Gcn1l1	2671	1068.58	23.09	High	0	6.98e-05	31240.3	15	168.9	0.5	H-2 Kb
Y3	MHC-DB	High	KAYSFKEQI	9		1	2	E9PVA8	GCN1_MOUSE	eIF-2-alpha kinase activator GCN1 (GCN1 eIF-2-alpha kinase activator homolog) (GCN1-like protein 1) (General control of amino-acid synthesis 1-like protein 1) (Translational activator GCN1)	Gcn1 Gcn1l1	2671	1113.59	33.46	High	0	2.234e-05	3711.9	1	64.5	0.2	H-2 Kb
B22	MHC-DB	High	VTVLNITHL	9		1	2	E9PZJ8	ASCC3_MOUSE	Activating signal cointegrator 1 complex subunit 3 (EC 3.6.4.12)	Ascc3	2198	1009.6	36.39	High	0	1.907e-05	89.2	0.06	177	0.5	H-2 Db
B22	MHC-DB	High	SAPANGILV	9		1	2	E9Q1P8	I2BP2_MOUSE	Interferon regulatory factor 2-binding protein 2 (IRF-2-binding protein 2) (IRF-2BP2)	Irf2bp2	570	841.478	23.08	High	0	0.003944	17.4	0.01	4448.1	6	H-2 Db
B22	MHC-DB	High	ASLSNRLYI	9		1	1	E9Q3L2	PI4KA_MOUSE	Phosphatidylinositol 4-kinase alpha (PI4-kinase alpha) (PI4K-alpha) (PtdIns-4-kinase alpha) (EC 2.7.1.67)	Pi4ka Pik4 Pik4ca	2105	1036.58	47.52	High	0	0.000101	4.2	0.01	1523	2.5	H-2 Db
B22	MHC-DB	High	FAGYNKQNTTL	11		1	1	E9Q3L2	PI4KA_MOUSE	Phosphatidylinositol 4-kinase alpha (PI4-kinase alpha) (PI4K-alpha) (PtdIns-4-kinase alpha) (EC 2.7.1.67)	Pi4ka Pik4 Pik4ca	2105	1256.63	20.77	High	0	0.0009685	489.4	0.25	7999.1	11	H-2 Db
B22	MHC-DB	High	ISQLSLVDL	9		1	1	E9Q5G3	KIF23_MOUSE	Kinesin-like protein KIF23	Kif23	953	987.572	30.22	High	0.002	0.01362	15635.4	5	706.6	1.4	H-2 Kb
B22	MHC-DB	High	AAVENVSEL	9		1	4	E9Q6J5	BD1L1_MOUSE	Biorientation of chromosomes in cell division protein 1-like 1	Bod1l Kiaa1327	3032	931.473	46.23	High	0	1.848e-06	9.7	0.01	2573	4	H-2 Db
B22	MHC-DB	High	VTVENTKTI	9		1	2	E9Q784	ZC3HD_MOUSE	Zinc finger CCCH domain-containing protein 13	Zc3h13	1729	1004.56	31.11	High	0	0.001811	316.5	0.15	5783	7.5	H-2 Db
Y3	MHC-DB	High	INYDYVHEL	9		1	1	E9Q784	ZC3HD_MOUSE	Zinc finger CCCH domain-containing protein 13	Zc3h13	1729	1165.55	31.21	High	0	9.98e-16	25537.2	10	21.2	0.06	H-2 Kb
B22	MHC-DB	High	AAVKNEVNV	9		1	1	E9Q8I9	FRY_MOUSE	Protein furry homolog	Fry Kiaa4143	3020	943.521	18.48	High	0	0.004812	103.2	0.07	2997.3	4.5	H-2 Db
B22	MHC-DB	High	TMKSHYMVL	9	1xOxidation [M7]	1	1	E9QMW4	CP096_MOUSE	Uncharacterized protein C16orf96 homolog		1145	1125.54	10.66	High	0.005	0.05468	13081.1	4	219.5	0.6	H-2 Kb
B22	MHC-DB	High	GALKNLSVIYI	11		1	2	F2Z461	HERC6_MOUSE	E3 ISG15--protein ligase Herc6 (EC 6.3.2.-)	Herc6	1003	1190.71	27.04	High	0.001	0.01062	112.1	0.07	22924.8	32	H-2 Db
B22	MHC-DB	High	GALKNLSVI	9		1	3	F2Z461	HERC6_MOUSE	E3 ISG15--protein ligase Herc6 (EC 6.3.2.-)	Herc6	1003	914.567	31.14	High	0	0.001371	8	0.01	8610.3	11	H-2 Db
B22	MHC-DB	High	ASLTNNQNL	9		1	2	F6ZDS4	TPR_MOUSE	Nucleoprotein TPR (NPC-associated intranuclear protein) (Translocated promoter region and nuclear basket protein)	Tpr	2431	974.49	26.6	High	0	0.0007155	73.8	0.05	1301	2.5	H-2 Db
B22	MHC-DB	High	HQMQLVDSI	9		1	2	F6ZDS4	TPR_MOUSE	Nucleoprotein TPR (NPC-associated intranuclear protein) (Translocated promoter region and nuclear basket protein)	Tpr	2431	1070.53	25.7	High	0	0.001397	762.1	0.3	23421.2	33	H-2 Db
Y3	MHC-DB	High	HQMQLVDSI	9		1	1	F6ZDS4	TPR_MOUSE	Nucleoprotein TPR (NPC-associated intranuclear protein) (Translocated promoter region and nuclear basket protein)	Tpr	2431	1070.53	12.16	High	0.003	0.003354	762.1	0.3	23421.2	33	H-2 Db
B22	MHC-DB	High	VSYRNIEEL	9		1	4	F6ZDS4	TPR_MOUSE	Nucleoprotein TPR (NPC-associated intranuclear protein) (Translocated promoter region and nuclear basket protein)	Tpr	2431	1122.58	35.5	High	0	3.856e-05	21.5	0.015	54.3	0.175	H-2 Db
Y3	MHC-DB	Medium	MYTLQEPI	8		1	1	F7A4A7	OTOGL_MOUSE	Otogelin-like protein	Otogl	2325	994.491	13.22	Medium	0.028	0.1211	3107.1	0.9	10521.5	14	H-2 Db
B22	MHC-DB	Medium	TMYVITTPAGL	11	1xOxidation [M2]	1	1	F7A4A7	OTOGL_MOUSE	Otogelin-like protein	Otogl	2325	1182.61	10.79	Medium	0.012	0.109	9209.8	2.5	1056	1.9	H-2 Kb
B22	MHC-DB	High	SAVENKDKL	9		1	3	G3X912	SPRTN_MOUSE	SprT-like domain-containing protein Spartan (Protein with SprT-like domain at the N terminus) (Spartan)	Sprtn Gm505	497	1003.54	27.07	High	0	0.001675	15.9	0.01	5460.2	7.5	H-2 Db
B22	MHC-DB	Medium	SGIHLTIEM	9		1	1	G5E829	AT2B1_MOUSE	Plasma membrane calcium-transporting ATPase 1 (PMCA1) (EC 3.6.3.8) (Plasma membrane calcium ATPase isoform 1) (Plasma membrane calcium pump isoform 1)	Atp2b1	1220	1000.51	10.44	Medium	0.023	0.1653	2060.8	0.6	2798.5	4.5	H-2 Db
B22	MHC-DB	High	FQLENFTLKV	10		1	2	O00425	IF2B3_HUMAN	Insulin-like growth factor 2 mRNA-binding protein 3 (IGF2 mRNA-binding protein 3) (IMP-3) (IGF-II mRNA-binding protein 3) (KH domain-containing protein overexpressed in cancer) (hKOC) (VICKZ family member 3)	IGF2BP3 IMP3 KOC1 VICKZ3	579	1238.68	33.18	High	0	2.22e-07	85.4	0.06	6663.1	8.5	H-2 Db
B22	MHC-DB	High	LSFAFFAAI	9		1	1	O08538	ANGP1_MOUSE	Angiopoietin-1 (ANG-1)	Angpt1 Agpt	498	986.535	22.15	High	0.001	0.0063	2133.6	0.6	4.9	0.01	H-2 Kb
B22	MHC-DB	High	NAVQNHTATM	10		1	2	O08538	ANGP1_MOUSE	Angiopoietin-1 (ANG-1)	Angpt1 Agpt	498	1086.5	34.99	High	0	4.634e-05	26.9	0.02	9737.5	13	H-2 Db
B22	MHC-DB	Medium	MVIEYSGIV	9		1	1	O08550	KMT2B_MOUSE	Histone-lysine N-methyltransferase 2B (Lysine N-methyltransferase 2B) (EC 2.1.1.43) (Myeloid/lymphoid or mixed-lineage leukemia protein 4 homolog) (Trithorax homolog 2) (WW domain-binding protein 7) (WBP-7)	Kmt2b Mll2 Trx2 Wbp7	2713	1010.52	10.96	Medium	0.037	0.2297	39238.6	28	753.7	1.5	H-2 Kb
Y3	MHC-DB	High	VSRSSLGL	8		1	1	O08579	EMD_MOUSE	Emerin	Emd Sta	259	818.473	22.48	High	0.008	0.02739	41179	33	368	0.9	H-2 Kb
Y3	MHC-DB	High	KVITFIDL	8		1	3	O08582	GTPB1_MOUSE	GTP-binding protein 1 (G-protein 1) (GP-1) (GP1)	Gtpbp1 Gtpbp	668	948.576	33.13	High	0	9.98e-16	23446.8	8.5	135.5	0.4	H-2 Kb
Y3	MHC-DB	High	VALLFHKM	8		1	1	O08586	PTEN_MOUSE	Phosphatidylinositol 3,4,5-trisphosphate 3-phosphatase and dual-specificity protein phosphatase PTEN (EC 3.1.3.16) (EC 3.1.3.48) (EC 3.1.3.67) (Mutated in multiple advanced cancers 1) (Phosphatase and tensin homolog)	Pten Mmac1	403	958.554	30.89	High	0	8.07e-14	7307.8	1.9	23.6	0.07	H-2 Kb
B22	MHC-DB	High	VGVPANIVTL	10		1	2	O08675	PAR3_MOUSE	Proteinase-activated receptor 3 (PAR-3) (Coagulation factor II receptor-like 2) (Thrombin receptor-like 2)	F2rl2 Par3	369	982.593	29.98	High	0.002	0.02105	162.9	0.09	6854.2	9	H-2 Db
B22	MHC-DB	High	FAPTNIILV	9		1	1	O08675	PAR3_MOUSE	Proteinase-activated receptor 3 (PAR-3) (Coagulation factor II receptor-like 2) (Thrombin receptor-like 2)	F2rl2 Par3	369	987.587	12.41	High	0.002	0.01741	19.1	0.015	2464.8	4	H-2 Db
B22	MHC-DB	Medium	SGFQDSDFI	9		1	1	O08677	KNG1_MOUSE	Kininogen-1 [Cleaved into: Kininogen-1 heavy chain; Bradykinin; Kininogen-1 light chain]	Kng1 Kng	661	1015.44	10.11	Medium	0.045	0.269	141.4	0.08	15008	20	H-2 Db
B22	MHC-DB	High	QTFQLLKL	8		1	1	O08712	TR11B_MOUSE	Tumor necrosis factor receptor superfamily member 11B (Osteoclastogenesis inhibitory factor) (Osteoprotegerin)	Tnfrsf11b Ocif Opg	401	990.598	12.72	High	0.003	0.03235	24142.7	9	406	0.9	H-2 Kb
B22	MHC-DB	High	AAPANPEMDNL	11		1	5	O08734	BAK_MOUSE	Bcl-2 homologous antagonist/killer (Apoptosis regulator BAK)	Bak1 Bak	209	1142.51	49.63	High	0	9.406e-05	141.7	0.08	22880.7	32	H-2 Db
B22	MHC-DB	High	AAPANPEMDNL	11	1xOxidation [M8]	1	1	O08734	BAK_MOUSE	Bcl-2 homologous antagonist/killer (Apoptosis regulator BAK)	Bak1 Bak	209	1158.51	15.94	High	0.003	0.03484	141.7	0.08	22880.7	32	H-2 Db
Y3	MHC-DB	High	VTYHGFPNL	9		1	6	O08760	OGG1_MOUSE	N-glycosylase/DNA lyase [Includes: 8-oxoguanine DNA glycosylase (EC 3.2.2.-); DNA-(apurinic or apyrimidinic site) lyase (AP lyase) (EC 4.2.99.18)]	Ogg1	345	1047.53	29.92	High	0	9.16e-14	10682.2	3	7.1	0.02	H-2 Kb
B22	MHC-DB	High	VLAANEAAL	9		1	1	O08852	PKD1_MOUSE	Polycystin-1 (Autosomal dominant polycystic kidney disease 1 protein homolog)	Pkd1	4293	871.488	14.77	High	0.007	0.06347	4997.4	1.3	2618.2	4	H-2 Db
B22	MHC-DB	High	QAINNAISYL	10		1	1	O08900	IKZF3_MOUSE	Zinc finger protein Aiolos (Ikaros family zinc finger protein 3)	Ikzf3 Zfpn1a3 Znfn1a3	507	1106.58	20.33	High	0.002	0.01708	60.8	0.04	6029.1	8	H-2 Db
B22	MHC-DB	High	AAVWNAQEA	9		1	1	O08915	AIP_MOUSE	AH receptor-interacting protein (AIP) (Aryl-hydrocarbon receptor-interacting protein)	Aip	330	959.458	42.34	High	0	3.95e-05	157.7	0.09	17864.3	24	H-2 Db
B22	MHC-DB	High	SSILNKYDDNV	11		1	1	O08915	AIP_MOUSE	AH receptor-interacting protein (AIP) (Aryl-hydrocarbon receptor-interacting protein)	Aip	330	1267.62	23.46	High	0	2.496e-05	654.7	0.3	3090.4	4.5	H-2 Db
B22	MHC-DB	High	AFGMGINKADI	11	1xOxidation [M4]	1	1	O09053	WRN_MOUSE	Werner syndrome ATP-dependent helicase homolog (EC 3.6.4.12) (Exonuclease WRN) (EC 3.1.-.-)	Wrn	1401	1152.57	11.75	High	0	0.001743	3318	0.9	26202.2	39	H-2 Db
Y3	MHC-DB	High	VIFGFLNM	8		1	2	O09117	SYPL1_MOUSE	Synaptophysin-like protein 1 (Pantophysin)	Sypl1 Pphn Sypl	261	940.496	28.89	High	0	4.45e-08	20207.7	7	6.3	0.015	H-2 Kb
Y3	MHC-DB	High	VNWEKHVLI	9		1	5	O09117	SYPL1_MOUSE	Synaptophysin-like protein 1 (Pantophysin)	Sypl1 Pphn Sypl	261	1137.64	31.49	High	0	1.601e-06	21133.6	7.5	97.3	0.3	H-2 Kb
Y3	MHC-DB	High	STYSVAKM	8		1	3	O09159	MA2B1_MOUSE	Lysosomal alpha-mannosidase (Laman) (EC 3.2.1.24) (Lysosomal acid alpha-mannosidase) (Mannosidase alpha class 2B member 1) (Mannosidase alpha-B)	Man2b1 Laman Man2b Manb	1013	886.434	38.5	High	0	0.0001872	28170.1	12	33.1	0.1	H-2 Kb
Y3	MHC-DB	High	SVFEKYFQF	9		1	1	O15144	ARPC2_HUMAN	Actin-related protein 2/3 complex subunit 2 (Arp2/3 complex 34 kDa subunit) (p34-ARC)	ARPC2 ARC34 PRO2446	300	1194.58	14.07	High	0	0.0002011	19298.2	6.5	48.1	0.15	H-2 Kb
Y3	MHC-DB	Medium	AAFCYMLTL	9	1xOxidation [M6]	1	1	O35089	CNIH2_MOUSE	Protein cornichon homolog 2 (CNIH-2) (Cornichon family AMPA receptor auxiliary protein 2) (Cornichon-like protein)	Cnih2 Cnil	160	1048.48	16.28	Medium	0.014	0.02739	1600.5	0.5	55.4	0.175	H-2 Kb
B22	MHC-DB	High	KSVINTTLV	9		1	3	O35114	SCRB2_MOUSE	Lysosome membrane protein 2 (85 kDa lysosomal membrane sialoglycoprotein) (LGP85) (Lysosome membrane protein II) (LIMP II) (Scavenger receptor class B member 2)	Scarb2	478	974.588	47.33	High	0	0.0001	24.7	0.015	2412.8	4	H-2 Db
B22	MHC-DB	High	SAVTNKAYVF	10		1	2	O35114	SCRB2_MOUSE	Lysosome membrane protein 2 (85 kDa lysosomal membrane sialoglycoprotein) (LGP85) (Lysosome membrane protein II) (LIMP II) (Scavenger receptor class B member 2)	Scarb2	478	1099.58	37.74	High	0	0.0001132	31.7	0.025	7490.2	9.5	H-2 Db
B22	MHC-DB	High	SAPENAVRM	9	1xOxidation [M9]	1	16	O35127	C10_MOUSE	Protein C10	Grcc10 C10	126	990.467	55.22	High	0	1.501e-05	12.4	0.01	1503.2	2.5	H-2 Db
B22	MHC-DB	High	SAPENAVRM	9		1	4	O35127	C10_MOUSE	Protein C10	Grcc10 C10	126	974.472	47.23	High	0	0.0008694	12.4	0.01	1503.2	2.5	H-2 Db
Y3	MHC-DB	High	SAPENAVRM	9		1	7	O35127	C10_MOUSE	Protein C10	Grcc10 C10	126	974.472	64.68	High	0	9.98e-16	12.4	0.01	1503.2	2.5	H-2 Db
Y3	MHC-DB	High	SAPENAVRM	9	1xOxidation [M9]	1	7	O35127	C10_MOUSE	Protein C10	Grcc10 C10	126	990.467	48.47	High	0	2.128e-05	12.4	0.01	1503.2	2.5	H-2 Db
Y3	MHC-DB	High	GVLKFARL	8		1	2	O35127	C10_MOUSE	Protein C10	Grcc10 C10	126	903.578	16.78	High	0.003	0.003654	35313.8	20	15.5	0.05	H-2 Kb
B22	MHC-DB	High	VSISNYPLSA	10		2	1	O35130	NEP1_MOUSE	Ribosomal RNA small subunit methyltransferase NEP1 (EC 2.1.1.-) (18S rRNA (pseudouridine(1248)-N1)-methyltransferase) (18S rRNA Psi1248 methyltransferase) (Nucleolar protein EMG1 homolog) (Protein C2f) (Ribosome biogenesis protein NEP1)	Emg1 C2f Grcc2f	244	1050.55	30.92	High	0	4.646e-05	1355.4	0.5	3145	4.5	H-2 Db
Y3	MHC-DB	High	VSVEYTEKM	9	1xOxidation [M9]	1	3	O35130	NEP1_MOUSE	Ribosomal RNA small subunit methyltransferase NEP1 (EC 2.1.1.-) (18S rRNA (pseudouridine(1248)-N1)-methyltransferase) (18S rRNA Psi1248 methyltransferase) (Nucleolar protein EMG1 homolog) (Protein C2f) (Ribosome biogenesis protein NEP1)	Emg1 C2f Grcc2f	244	1101.51	60.98	High	0	9.98e-16	10678.6	3	225.2	0.6	H-2 Kb
Y3	MHC-DB	High	VSVEYTEKM	9		1	4	O35130	NEP1_MOUSE	Ribosomal RNA small subunit methyltransferase NEP1 (EC 2.1.1.-) (18S rRNA (pseudouridine(1248)-N1)-methyltransferase) (18S rRNA Psi1248 methyltransferase) (Nucleolar protein EMG1 homolog) (Protein C2f) (Ribosome biogenesis protein NEP1)	Emg1 C2f Grcc2f	244	1085.52	40.95	High	0.002	0.000932	10678.6	3	225.2	0.6	H-2 Kb
Y3	MHC-DB	High	INFDMSSLVV	10	1xOxidation [M5]	1	2	O35134	RPA1_MOUSE	DNA-directed RNA polymerase I subunit RPA1 (RNA polymerase I subunit A1) (EC 2.7.7.6) (DNA-directed RNA polymerase I largest subunit) (DNA-directed RNA polymerase I subunit A) (RNA polymerase I 194 kDa subunit) (RPA194)	Polr1a Rpa1 Rpo1-4	1717	1140.56	14.3	High	0.003	0.003654	28538.2	13	737.7	1.4	H-2 Kb
B22	MHC-DB	High	SSFMNPDKI	9		1	1	O35185	BHE40_MOUSE	Class E basic helix-loop-helix protein 40 (bHLHe40) (Class B basic helix-loop-helix protein 2) (bHLHb2) (E47 interaction protein 1) (EIP1) (Stimulated by retinoic acid gene 13 protein)	Bhlhe40 Bhlhb2 Clast5 Stra13	411	1038.49	28.6	High	0	2.899e-05	14.6	0.01	1538.8	2.5	H-2 Db
B22	MHC-DB	High	RVVRNQQSM	9		1	1	O35239	PTN9_MOUSE	Tyrosine-protein phosphatase non-receptor type 9 (EC 3.1.3.48) (Protein-tyrosine phosphatase MEG2) (PTPase MEG2)	Ptpn9	593	1117.59	12.41	High	0.003	0.02584	465	0.2	4867.9	6.5	H-2 Db
Y3	MHC-DB	High	SNYQYLLHL	9		1	1	O35242	FAN_MOUSE	Protein FAN (Factor associated with neutral sphingomyelinase activation) (Factor associated with N-SMase activation)	Nsmaf Fan	920	1150.59	34.69	High	0.003	0.000932	4226.3	1.1	5.5	0.015	H-2 Kb
Y3	MHC-DB	High	RSISFSNM	8		1	2	O35242	FAN_MOUSE	Protein FAN (Factor associated with neutral sphingomyelinase activation) (Factor associated with N-SMase activation)	Nsmaf Fan	920	941.451	18.15	High	0	9.98e-16	19647.1	6.5	6.2	0.015	H-2 Kb
B22	MHC-DB	High	RALELLNYL	9		2	3	O35286	DHX15_MOUSE	Pre-mRNA-splicing factor ATP-dependent RNA helicase DHX15 (EC 3.6.4.13) (DEAH box protein 15)	Dhx15 Ddx15 Deah9	795	1104.64	38.17	High	0	5.008e-06	115.8	0.07	656.6	1.3	H-2 Db
Y3	MHC-DB	Medium	GQVMNFKGDI	10	1xOxidation [M4]	1	1	O35305	TNR11_MOUSE	Tumor necrosis factor receptor superfamily member 11A (Osteoclast differentiation factor receptor) (ODFR) (Receptor activator of NF-KB) (CD antigen CD265)	Tnfrsf11a Rank	625	1124.54	10.33	Medium	0.016	0.06794	3890.4	1	8489	11	H-2 Db
B22	MHC-DB	High	YGLDKIEFL	9		1	1	O35345	IMA7_MOUSE	Importin subunit alpha-7 (Importin alpha-S2) (Karyopherin subunit alpha-6)	Kpna6 Kpna5	536	1097.59	34.67	High	0	7.157e-05	5607.7	1.5	7615.1	10	H-2 Db
B22	MHC-DB	High	FSLESCRSM	9	1xOxidation [M9]	1	2	O35350	CAN1_MOUSE	Calpain-1 catalytic subunit (EC 3.4.22.52) (Calcium-activated neutral proteinase 1) (CANP 1) (Calpain mu-type) (Calpain-1 large subunit) (Micromolar-calpain) (muCANP)	Capn1 Canp1 Capa1	713	1075.45	13.14	High	0.002	0.01582	3992.5	1.1	2172.2	3.5	H-2 Db
Y3	MHC-DB	High	FQYIFEGL	8		1	2	O35382	EXOC4_MOUSE	Exocyst complex component 4 (Exocyst complex component Sec8)	Exoc4 Sec8 Sec8l1	975	1016.51	22.01	High	0	4.438e-06	11447	3.5	13.2	0.04	H-2 Kb
Y3	MHC-DB	High	SAYQRGESL	9		1	4	O35382	EXOC4_MOUSE	Exocyst complex component 4 (Exocyst complex component Sec8)	Exoc4 Sec8 Sec8l1	975	1010.49	36.92	High	0	1.95e-07	1760.3	0.6	233.2	0.6	H-2 Kb
B22	MHC-DB	Medium	IAVSKPNGPL	10		1	1	O35405	PLD3_MOUSE	Phospholipase D3 (PLD 3) (EC 3.1.4.4) (Choline phosphatase 3) (Phosphatidylcholine-hydrolyzing phospholipase D3) (Schwannoma-associated protein 9) (SAM-9)	Pld3 Sam9	488	995.588	15.22	Medium	0.039	0.2353	7035.7	1.8	3130.3	4.5	H-2 Db
Y3	MHC-DB	High	IVQEFLTAM	9		1	1	O35427	RPC9_MOUSE	DNA-directed RNA polymerase III subunit RPC9 (RNA polymerase III subunit C9) (Calcitonin gene-related peptide-receptor component protein) (CGRP-RCP) (CGRP-receptor component protein) (CGRPRCP)	Crcp	148	1051.55	18.87	High	0	2.95e-13	11971.8	3.5	62.8	0.2	H-2 Kb
Y3	MHC-DB	Medium	VHLICYSQGGL	11		1	1	O35448	PPT2_MOUSE	Lysosomal thioesterase PPT2 (PPT-2) (EC 3.1.2.-)	Ppt2	302	1189.6	11.77	Medium	0.038	0.3489	30821.3	15	1005.5	1.8	H-2 Kb
B22	MHC-DB	High	FGFTMNMLDI	10	2xOxidation [M5; M7]	1	1	O35484	AZIN1_MOUSE	Antizyme inhibitor 1 (AZI) (Ornithine decarboxylase antizyme inhibitor)	Azin1 Oazi Oazin	448	1220.53	12.93	High	0.004	0.04342	335.7	0.175	7919	10	H-2 Db
B22	MHC-DB	High	TNPLNGQYI	9		1	1	O35516	NOTC2_MOUSE	Neurogenic locus notch homolog protein 2 (Notch 2) (Motch B) [Cleaved into: Notch 2 extracellular truncation; Notch 2 intracellular domain]	Notch2	2470	1019.52	28.15	High	0	0.0002786	182	0.1	6373.7	8.5	H-2 Db
B22	MHC-DB	High	VAVVNKVDI	9		1	3	O35604	NPC1_MOUSE	Niemann-Pick C1 protein	Npc1	1277	956.578	36.77	High	0	0.0009057	22.8	0.015	2794.1	4.5	H-2 Db
B22	MHC-DB	High	VQLQLLTAI	9		1	2	O35643	AP1B1_MOUSE	AP-1 complex subunit beta-1 (Adaptor protein complex AP-1 subunit beta-1) (Adaptor-related protein complex 1 subunit beta-1) (Beta-1-adaptin) (Beta-adaptin 1) (Clathrin assembly protein complex 1 beta large chain) (Golgi adaptor HA1/AP1 adaptin beta subunit)	Ap1b1 Adtb1	943	998.625	26.85	High	0	0.0001156	273.1	0.15	1269.1	2.5	H-2 Db
B22	MHC-DB	High	ISGVNRYYV	9		1	2	O35683	NDUA1_MOUSE	NADH dehydrogenase [ubiquinone] 1 alpha subcomplex subunit 1 (Complex I-MWFE) (CI-MWFE) (NADH-ubiquinone oxidoreductase MWFE subunit)	Ndufa1	70	1070.56	39.09	High	0	2.52e-05	13.8	0.01	1426.5	2.5	H-2 Db
Y3	MHC-DB	High	ISGVNRYYV	9		1	1	O35683	NDUA1_MOUSE	NADH dehydrogenase [ubiquinone] 1 alpha subcomplex subunit 1 (Complex I-MWFE) (CI-MWFE) (NADH-ubiquinone oxidoreductase MWFE subunit)	Ndufa1	70	1070.56	23.59	High	0.003	0.0009646	13.8	0.01	1426.5	2.5	H-2 Db
Y3	MHC-DB	High	VNTFFSFL	8		1	1	O35685	NUDC_MOUSE	Nuclear migration protein nudC (Nuclear distribution protein C homolog) (Silica-induced gene 92 protein) (SIG-92)	Nudc	332	974.498	11.9	High	0.003	0.003654	15869.4	5	12.6	0.04	H-2 Kb
Y3	MHC-DB	High	ASFNFLGL	8		1	2	O35704	SPTC1_MOUSE	Serine palmitoyltransferase 1 (EC 2.3.1.50) (Long chain base biosynthesis protein 1) (LCB 1) (Serine-palmitoyl-CoA transferase 1) (SPT 1) (SPT1)	Sptlc1 Lcb1	473	868.456	14.38	High	0.003	0.000932	9406.7	2.5	3.1	0.01	H-2 Kb
Y3	MHC-DB	High	MCLSNFQTI	9	1xOxidation [M1]	1	3	O35709	ENC1_MOUSE	Ectoderm-neural cortex protein 1 (ENC-1)	Enc1 Enc-1	589	1072.48	22.59	High	0.005	0.02739	96.5	0.06	2034	3.5	H-2 Db
B22	MHC-DB	High	FSPLNPVRVHI	11		1	1	O35737	HNRH1_MOUSE	Heterogeneous nuclear ribonucleoprotein H (hnRNP H) [Cleaved into: Heterogeneous nuclear ribonucleoprotein H, N-terminally processed]	Hnrnph1 Hnrph Hnrph1	449	1278.73	31.26	High	0	1.855e-05	292.3	0.15	17887.1	24	H-2 Db
B22	MHC-DB	High	FNLVNNALL	9		1	1	O35841	API5_MOUSE	Apoptosis inhibitor 5 (API-5) (AAC-11)	Api5	504	1017.57	21.24	High	0.001	0.009675	52.2	0.04	500.2	1.1	H-2 Db
Y3	MHC-DB	High	SNFNYERSL	9		1	1	O35841	API5_MOUSE	Apoptosis inhibitor 5 (API-5) (AAC-11)	Api5	504	1129.53	31.16	High	0.003	0.000932	32911.3	17	20	0.06	H-2 Kb
B22	MHC-DB	High	HAHLNLHYL	9		1	2	O35943	FRDA_MOUSE	Frataxin, mitochondrial (Fxn) (EC 1.16.3.1) [Cleaved into: Frataxin intermediate form; Frataxin mature form]	Fxn Frda	207	1117.59	20.14	High	0	2.121e-05	9.1	0.01	2228.5	3.5	H-2 Db
B22	MHC-DB	High	KAPTNEFYA	9		1	4	O35988	SDC4_MOUSE	Syndecan-4 (SYND4) (Ryudocan core protein)	Sdc4	198	1040.5	28.48	High	0	0.004753	50.2	0.04	13200	17	H-2 Db
B22	MHC-DB	High	YSVRNIFHLF	10		1	1	O54692	ZW10_MOUSE	Centromere/kinetochore protein zw10 homolog	Zw10	779	1295.69	21.15	High	0	3.89e-07	133.3	0.08	4005	5.5	H-2 Db
B22	MHC-DB	High	YSVRNIFHL	9		1	5	O54692	ZW10_MOUSE	Centromere/kinetochore protein zw10 homolog	Zw10	779	1148.62	23.1	High	0	2.549e-05	7.9	0.01	484.3	1.1	H-2 Db
Y3	MHC-DB	High	STVEFTNL	8		1	3	O54692	ZW10_MOUSE	Centromere/kinetochore protein zw10 homolog	Zw10	779	910.452	38.56	High	0	9.98e-16	25695.7	10	5.4	0.015	H-2 Kb
B22	MHC-DB	High	GGNINVETI	9		1	3	O54734	OST48_MOUSE	Dolichyl-diphosphooligosaccharide--protein glycosyltransferase 48 kDa subunit (DDOST 48 kDa subunit) (Oligosaccharyl transferase 48 kDa subunit) (EC 2.4.99.18)	Ddost	441	916.473	36.96	High	0	0.001359	80.5	0.05	31170.7	55	H-2 Db
Y3	MHC-DB	High	GGNINVETI	9		1	1	O54734	OST48_MOUSE	Dolichyl-diphosphooligosaccharide--protein glycosyltransferase 48 kDa subunit (DDOST 48 kDa subunit) (Oligosaccharyl transferase 48 kDa subunit) (EC 2.4.99.18)	Ddost	441	916.473	19.61	High	0.008	0.02739	80.5	0.05	31170.7	55	H-2 Db
Y3	MHC-DB	High	NAYKFPNL	8		1	3	O54754	AOXA_MOUSE	Aldehyde oxidase 1 (EC 1.2.3.1) (Azaheterocycle hydroxylase 1) (EC 1.17.3.-) (Retinal oxidase)	Aox1 Ao Ro	1333	966.504	25.72	High	0.003	0.000932	18430.5	6	5.6	0.015	H-2 Kb
Y3	MHC-DB	High	SNYQHITNF	9		1	2	O54774	AP3D1_MOUSE	AP-3 complex subunit delta-1 (AP-3 complex subunit delta) (Adaptor-related protein complex 3 subunit delta-1) (Delta-adaptin) (mBLVR1)	Ap3d1 Ap3d	1199	1123.52	37.19	High	0	9.98e-16	11088.3	3	98.7	0.3	H-2 Kb
B22	MHC-DB	Medium	VALQHGPVV	9		1	1	O54782	MA2B2_MOUSE	Epididymis-specific alpha-mannosidase (EC 3.2.1.24) (Mannosidase alpha class 2B member 2)	Man2b2 Kiaa0935	1018	919.536	13.62	Medium	0.013	0.1142	916.8	0.4	1946.4	3	H-2 Db
B22	MHC-DB	High	SMPRNTSYA	9		1	2	O54784	DAPK3_MOUSE	Death-associated protein kinase 3 (DAP kinase 3) (EC 2.7.11.1) (DAP-like kinase) (Dlk) (MYPT1 kinase) (ZIP-kinase)	Dapk3 Zipk	448	1026.47	18.17	High	0	0.00101	20.7	0.015	7156.7	9.5	H-2 Db
B22	MHC-DB	Medium	SMPRNTSYA	9	1xOxidation [M2]	1	1	O54784	DAPK3_MOUSE	Death-associated protein kinase 3 (DAP kinase 3) (EC 2.7.11.1) (DAP-like kinase) (Dlk) (MYPT1 kinase) (ZIP-kinase)	Dapk3 Zipk	448	1042.46	15.49	Medium	0.033	0.214	20.7	0.015	7156.7	9.5	H-2 Db
B22	MHC-DB	High	ISPNNRNAI	9		1	2	O54785	LIMK2_MOUSE	LIM domain kinase 2 (LIMK-2) (EC 2.7.11.1)	Limk2	638	998.538	19.94	High	0	0.001083	49.8	0.04	2480.3	4	H-2 Db
B22	MHC-DB	High	FSTWNLDHI	9		1	2	O54788	DFFB_MOUSE	DNA fragmentation factor subunit beta (EC 3.-.-.-) (Caspase-activated deoxyribonuclease) (CAD) (Caspase-activated DNase) (DNA fragmentation factor 40 kDa subunit) (DFF-40)	Dffb Cad	344	1132.54	15.84	High	0	0.001356	19.7	0.015	5622.5	7.5	H-2 Db
Y3	MHC-DB	Medium	IIIFSRVL	8		1	1	O54798	BRS3_MOUSE	Bombesin receptor subtype-3 (BRS-3)	Brs3	399	960.624	20.94	Medium	0.031	0.3489	27484.3	12	687.8	1.4	H-2 Kb
Y3	MHC-DB	High	KRLNFHLYM	9		1	1	O54825	BYST_MOUSE	Bystin	Bysl	436	1221.66	10.82	High	0	5.72e-13	14494.3	4.5	777	1.5	H-2 Kb
B22	MHC-DB	Medium	MSFSFSQP	8	1xOxidation [M1]	1	1	O54831	PR7A2_MOUSE	Prolactin-7A2 (Placental prolactin-like protein F) (PLP-F) (PRL-like protein F)	Prl7a2 Prlpf	253	946.398	17.06	Medium	0.011	0.09133	39227.1	28	607.8	1.2	H-2 Kb
Y3	MHC-DB	High	VGYNPYSHL	9		1	1	O54941	SMCE1_MOUSE	SWI/SNF-related matrix-associated actin-dependent regulator of chromatin subfamily E member 1 (BRG1-associated factor 57) (BAF57)	Smarce1 Baf57	411	1049.51	22.26	High	0.002	0.000932	10326.2	3	4.2	0.01	H-2 Kb
Y3	MHC-DB	High	TITDFINI	8		1	2	O54950	AAKG1_MOUSE	5'-AMP-activated protein kinase subunit gamma-1 (AMPK gamma1) (AMPK subunit gamma-1) (AMPKg)	Prkag1 Prkaac	330	936.504	31.65	High	0	0.0002899	30863.7	15	672.4	1.3	H-2 Kb
Y3	MHC-DB	High	RILKFLKL	8		1	2	O54950	AAKG1_MOUSE	5'-AMP-activated protein kinase subunit gamma-1 (AMPK gamma1) (AMPK subunit gamma-1) (AMPKg)	Prkag1 Prkaac	330	1030.71	20.82	High	0.003	0.001172	33160.1	17	69.5	0.2	H-2 Kb
B22	MHC-DB	High	RNKENQETL	9		1	2	O54988	SLK_MOUSE	STE20-like serine/threonine-protein kinase (STE20-like kinase) (mSLK) (EC 2.7.11.1) (Etk4) (STE20-related kinase SMAK) (STE20-related serine/threonine-protein kinase) (STE20-related kinase) (Serine/threonine-protein kinase 2)	Slk Kiaa0204 Stk2	1233	1131.58	27.1	High	0	0.0004511	4722.1	1.3	16909.2	22	H-2 Db
B22	MHC-DB	High	LSMRNTSVM	9	2xOxidation [M3; M9]	1	3	O55003	BNIP3_MOUSE	BCL2/adenovirus E1B 19 kDa protein-interacting protein 3	Bnip3 Nip3	187	1070.5	52.16	High	0	3.63e-06	10.5	0.01	2238.6	3.5	H-2 Db
B22	MHC-DB	High	LSMRNTSVM	9	1xOxidation [M]	1	7	O55003	BNIP3_MOUSE	BCL2/adenovirus E1B 19 kDa protein-interacting protein 3	Bnip3 Nip3	187	1054.5	40.36	High	0	2.994e-05	10.5	0.01	2238.6	3.5	H-2 Db
B22	MHC-DB	High	LSMRNTSVM	9		1	3	O55003	BNIP3_MOUSE	BCL2/adenovirus E1B 19 kDa protein-interacting protein 3	Bnip3 Nip3	187	1038.51	33.37	High	0	2.889e-05	10.5	0.01	2238.6	3.5	H-2 Db
Y3	MHC-DB	High	LSMRNTSVM	9		1	2	O55003	BNIP3_MOUSE	BCL2/adenovirus E1B 19 kDa protein-interacting protein 3	Bnip3 Nip3	187	1038.51	25.72	High	0	0.0005482	10.5	0.01	2238.6	3.5	H-2 Db
Y3	MHC-DB	High	HSALIYSNL	9		1	2	O55013	TPPC3_MOUSE	Trafficking protein particle complex subunit 3 (BET3 homolog)	Trappc3 Bet3	180	1017.54	23.03	High	0.003	0.0009683	25236.7	10	107.8	0.3	H-2 Kb
Y3	MHC-DB	High	SALIYSNL	8		1	2	O55013	TPPC3_MOUSE	Trafficking protein particle complex subunit 3 (BET3 homolog)	Trappc3 Bet3	180	880.477	53.16	High	0	2.11e-09	14828	4.5	3.4	0.01	H-2 Kb
Y3	MHC-DB	High	RGFEFTLM	8		1	2	O55131	SEPT7_MOUSE	Septin-7 (CDC10 protein homolog)	Sept7 Cdc10	436	1000.49	20.31	High	0.003	0.000932	19138.5	6.5	18.5	0.06	H-2 Kb
B22	MHC-DB	High	FSHPNVLPVL	10		1	1	O55222	ILK_MOUSE	Integrin-linked protein kinase (EC 2.7.11.1)	Ilk	452	1122.63	27.6	High	0	0.0004495	104.5	0.07	6896	9	H-2 Db
Y3	MHC-DB	High	RGYSYDLKV	9		1	1	O55234	PSB5_MOUSE	Proteasome subunit beta type-5 (EC 3.4.25.1) (Macropain epsilon chain) (Multicatalytic endopeptidase complex epsilon chain) (Proteasome chain 6) (Proteasome epsilon chain) (Proteasome subunit X)	Psmb5	264	1100.57	10.37	High	0.003	0.003654	36848.6	23	330.6	0.8	H-2 Kb
Y3	MHC-DB	High	SSMTYEKL	8		1	4	O70273	EHF_MOUSE	ETS homologous factor (ETS domain-containing transcription factor)	Ehf	300	958.455	42.8	High	0	9.98e-16	13363.7	4	15.6	0.05	H-2 Kb
Y3	MHC-DB	High	SSMTYEKL	8	1xOxidation [M3]	1	3	O70273	EHF_MOUSE	ETS homologous factor (ETS domain-containing transcription factor)	Ehf	300	974.45	41.26	High	0	9.98e-16	13363.7	4	15.6	0.05	H-2 Kb
B22	MHC-DB	Medium	FGIHNSVGI	9		1	1	O70324	MOT8_MOUSE	Monocarboxylate transporter 8 (MCT 8) (Solute carrier family 16 member 2) (X-linked PEST-containing transporter)	Slc16a2 Mct8 Xpct	545	943.5	14.93	Medium	0.034	0.2198	278.6	0.15	3900	5.5	H-2 Db
B22	MHC-DB	Medium	ISSRSSSPL	9		1	2	O70361	PER3_MOUSE	Period circadian protein homolog 3 (mPER3) (Circadian clock protein PERIOD 3)	Per3	1113	933.5	15.05	Medium	0.016	0.1257	10561.1	3	429.8	1	H-2 Kb
Y3	MHC-DB	High	TNLRFLQQI	9		1	1	O70372	TERT_MOUSE	Telomerase reverse transcriptase (EC 2.7.7.49) (Telomerase catalytic subunit)	Tert	1122	1132.65	30.81	High	0	9.98e-16	13899	4	60.6	0.175	H-2 Kb
B22	MHC-DB	High	KAVENSSTAI	10		2	4	O70435	PSA3_MOUSE	Proteasome subunit alpha type-3 (EC 3.4.25.1) (Macropain subunit C8) (Multicatalytic endopeptidase complex subunit C8) (Proteasome component C8) (Proteasome subunit K)	Psma3	255	1019.54	49.73	High	0	3.485e-06	47.5	0.04	12552.3	16	H-2 Db
Y3	MHC-DB	High	KAVENSSTAI	10		2	2	O70435	PSA3_MOUSE	Proteasome subunit alpha type-3 (EC 3.4.25.1) (Macropain subunit C8) (Multicatalytic endopeptidase complex subunit C8) (Proteasome component C8) (Proteasome subunit K)	Psma3	255	1019.54	33.49	High	0	1.54e-12	47.5	0.04	12552.3	16	H-2 Db
Y3	MHC-DB	Medium	LGILSGCWI	9		1	1	O70445	BARD1_MOUSE	BRCA1-associated RING domain protein 1 (BARD-1) (EC 6.3.2.-)	Bard1	765	961.518	12.85	Medium	0.015	0.02742	2648.6	0.8	17172.1	23	H-2 Db
B22	MHC-DB	High	FAIINSNPIEL	11		1	2	O70472	TM131_MOUSE	Transmembrane protein 131 (Protein RW1)	Tmem131 D1Bwg0491e Kiaa0257 Rw1	1877	1230.67	45.65	High	0	1.78e-07	11	0.01	7171.8	9.5	H-2 Db
B22	MHC-DB	High	SSPTHTATSI	10		1	3	O70472	TM131_MOUSE	Transmembrane protein 131 (Protein RW1)	Tmem131 D1Bwg0491e Kiaa0257 Rw1	1877	1001.49	34.16	High	0	0.0007045	1118.1	0.4	6105.1	8	H-2 Db
B22	MHC-DB	Medium	ITALSVQML	9	1xOxidation [M8]	1	1	O70481	UBR1_MOUSE	E3 ubiquitin-protein ligase UBR1 (EC 6.3.2.-) (N-recognin-1) (Ubiquitin-protein ligase E3-alpha-1) (Ubiquitin-protein ligase E3-alpha-I)	Ubr1	1757	991.549	14.82	Medium	0.032	0.2065	26770.5	11	1057.4	1.9	H-2 Kb
Y3	MHC-DB	High	STFEFHSI	8		1	3	O70481	UBR1_MOUSE	E3 ubiquitin-protein ligase UBR1 (EC 6.3.2.-) (N-recognin-1) (Ubiquitin-protein ligase E3-alpha-1) (Ubiquitin-protein ligase E3-alpha-I)	Ubr1	1757	967.452	24.27	High	0	4.26e-09	15032.7	4.5	16.8	0.05	H-2 Kb
B22	MHC-DB	High	ISGVNGTHI	9		1	3	O70551	SRPK1_MOUSE	SRSF protein kinase 1 (EC 2.7.11.1) (SFRS protein kinase 1) (Serine/arginine-rich protein-specific kinase 1) (SR-protein-specific kinase 1)	Srpk1	648	897.479	45.34	High	0	4.983e-06	29.1	0.02	3045.1	4.5	H-2 Db
Y3	MHC-DB	High	ISGVNGTHI	9		1	1	O70551	SRPK1_MOUSE	SRSF protein kinase 1 (EC 2.7.11.1) (SFRS protein kinase 1) (Serine/arginine-rich protein-specific kinase 1) (SR-protein-specific kinase 1)	Srpk1	648	897.479	29.94	High	0.004	0.02296	29.1	0.02	3045.1	4.5	H-2 Db
B22	MHC-DB	High	GAVLNDPYM	9		1	3	O88196	TTC3_MOUSE	E3 ubiquitin-protein ligase TTC3 (EC 6.3.2.-) (TPR repeat protein D) (Mtprd)	Ttc3 Kiaa4119	1979	979.455	67.45	High	0	2.69e-07	15.8	0.01	8538.9	11	H-2 Db
B22	MHC-DB	High	GAVLNDPYM	9	1xOxidation [M9]	1	2	O88196	TTC3_MOUSE	E3 ubiquitin-protein ligase TTC3 (EC 6.3.2.-) (TPR repeat protein D) (Mtprd)	Ttc3 Kiaa4119	1979	995.45	32.02	High	0	0.003164	15.8	0.01	8538.9	11	H-2 Db
B22	MHC-DB	High	RSAAQAFTEL	10		1	2	O88196	TTC3_MOUSE	E3 ubiquitin-protein ligase TTC3 (EC 6.3.2.-) (TPR repeat protein D) (Mtprd)	Ttc3 Kiaa4119	1979	1093.56	10.56	High	0.004	0.04351	7618.8	2	5398.8	7.5	H-2 Db
Y3	MHC-DB	High	INVLYNRI	8		1	1	O88346	TNNT1_MOUSE	Troponin T, slow skeletal muscle (TnTs) (Slow skeletal muscle troponin T) (sTnT)	Tnnt1	262	1004.59	17.53	High	0	0.0002646	33776.8	18	27.7	0.08	H-2 Kb
B22	MHC-DB	High	KSMENLIEL	9		1	2	O88413	TULP3_MOUSE	Tubby-related protein 3 (Tubby-like protein 3)	Tulp3	460	1076.57	26.69	High	0	0.002979	15.4	0.01	515.5	1.1	H-2 Db
B22	MHC-DB	High	SLITNSHADHL	11		1	1	O88491	NSD1_MOUSE	Histone-lysine N-methyltransferase, H3 lysine-36 and H4 lysine-20 specific (EC 2.1.1.43) (H3-K36-HMTase) (H4-K20-HMTase) (Nuclear receptor-binding SET domain-containing protein 1) (NR-binding SET domain-containing protein)	Nsd1	2588	1207.61	38.19	High	0	1.951e-06	1572.2	0.5	12770.9	16	H-2 Db
B22	MHC-DB	High	ASMINVEYL	9		1	2	O88491	NSD1_MOUSE	Histone-lysine N-methyltransferase, H3 lysine-36 and H4 lysine-20 specific (EC 2.1.1.43) (H3-K36-HMTase) (H4-K20-HMTase) (Nuclear receptor-binding SET domain-containing protein 1) (NR-binding SET domain-containing protein)	Nsd1	2588	1039.51	20.97	High	0	0.002226	4.6	0.01	803.6	1.5	H-2 Db
B22	MHC-DB	High	MMQELQAFL	9	1xOxidation [M2]	1	2	O88512	AP1G2_MOUSE	AP-1 complex subunit gamma-like 2 (Gamma2-adaptin) (G2ad)	Ap1g2	791	1126.53	21.3	High	0.001	0.006051	4248.8	1.1	778	1.5	H-2 Db
B22	MHC-DB	High	LAFLLPQAL	9		1	2	O88516	DLL3_MOUSE	Delta-like protein 3 (Drosophila Delta homolog 3) (Delta3) (M-Delta-3)	Dll3	592	985.608	41.53	High	0	0.003833	3238.9	0.9	302.4	0.7	H-2 Kb
B22	MHC-DB	High	GHLTNLTHL	9		1	1	O88520	SHOC2_MOUSE	Leucine-rich repeat protein SHOC-2 (Protein soc-2 homolog) (Protein sur-8 homolog)	Shoc2	582	1005.55	21.56	High	0.001	0.007299	489.2	0.25	3843	5.5	H-2 Db
B22	MHC-DB	High	NQFVNKFNVL	10		2	4	O88545	CSN6_MOUSE	COP9 signalosome complex subunit 6 (SGN6) (Signalosome subunit 6) (JAB1-containing signalosome subunit 6)	Cops6 Csn6	324	1222.66	53.53	High	0	6.252e-05	534.9	0.25	3897.9	5.5	H-2 Db
B22	MHC-DB	High	TGILNPEGYTL	11		1	3	O88554	PARP2_MOUSE	Poly [ADP-ribose] polymerase 2 (PARP-2) (mPARP-2) (EC 2.4.2.30) (ADP-ribosyltransferase diphtheria toxin-like 2) (ARTD2) (NAD(+) ADP-ribosyltransferase 2) (ADPRT-2) (Poly[ADP-ribose] synthase 2) (pADPRT-2)	Parp2 Adprt2 Adprtl2 Aspartl2	559	1177.61	38.59	High	0	0.0001422	313.4	0.15	20204.4	28	H-2 Db
B22	MHC-DB	Medium	GQLPTSYLPI	10		1	1	O88621	FOXH1_MOUSE	Forkhead box protein H1 (Forkhead activin signal transducer 1) (Fast-1) (Forkhead activin signal transducer 2) (Fast-2)	Foxh1 Fast1 Fast2	401	1088.6	14.07	Medium	0.018	0.1355	2496.7	0.7	14674.6	19	H-2 Db
Y3	MHC-DB	High	QVVQFNRL	8		1	4	O88653	LTOR3_MOUSE	Ragulator complex protein LAMTOR3 (Late endosomal/lysosomal adaptor and MAPK and MTOR activator 3) (MEK-binding partner 1) (Mp1) (Mitogen-activated protein kinase kinase 1-interacting protein 1) (Mitogen-activated protein kinase scaffold protein 1)	Lamtor3 Map2k1ip1 Mapbp Mapksp1	124	1003.57	37.08	High	0.002	0.000932	31182.2	15	36.9	0.125	H-2 Kb
B22	MHC-DB	High	VMADSLLDVL	10		1	1	O88665	BRD7_MOUSE	Bromodomain-containing protein 7 (75 kDa bromodomain protein)	Brd7 Bp75	651	1075.57	14.6	High	0	0.004821	4909.4	1.3	6720.3	9	H-2 Db
B22	MHC-DB	Medium	VAAAAKNGTSL	11		1	1	O88811	STAM2_MOUSE	Signal transducing adapter molecule 2 (STAM-2) (Hrs-binding protein)	Stam2 Hbp	523	1002.56	10.98	Medium	0.044	0.2616	1350.9	0.5	16352	21	H-2 Db
B22	MHC-DB	High	YVLVNVWTI	9		1	2	O88822	SC5D_MOUSE	Lathosterol oxidase (EC 1.14.19.20) (C-5 sterol desaturase) (Delta(7)-sterol 5-desaturase) (Delta(7)-sterol C5(6)-desaturase) (Lathosterol 5-desaturase) (Sterol-C5-desaturase)	Sc5d Sc5dl	299	1106.62	28.28	High	0	0.0002534	7.5	0.01	8519.3	11	H-2 Db
Y3	MHC-DB	High	SNLYYKYL	8		1	1	O88845	AKA10_MOUSE	A-kinase anchor protein 10, mitochondrial (AKAP-10) (Dual specificity A kinase-anchoring protein 2) (D-AKAP-2) (Protein kinase A-anchoring protein 10) (PRKA10)	Akap10	662	1063.55	22.39	High	0.001	0.000932	21296.4	7.5	9.4	0.03	H-2 Kb
Y3	MHC-DB	Medium	SRYTGASL	8		1	1	O88895	HDAC3_MOUSE	Histone deacetylase 3 (HD3) (EC 3.5.1.98)	Hdac3	424	854.437	17.5	Medium	0.016	0.09212	36313.5	22	738.9	1.4	H-2 Kb
B22	MHC-DB	High	SLLTNHVTL	9		1	4	O88904	HIPK1_MOUSE	Homeodomain-interacting protein kinase 1 (EC 2.7.11.1) (Nuclear body-associated kinase 2) (Protein kinase Myak)	Hipk1 Kiaa0630 Myak Nbak2	1210	997.568	31.26	High	0	9.391e-06	47.9	0.04	1266	2.5	H-2 Db
B22	MHC-DB	High	VSILNYQSAL	10		2	6	O88904	HIPK1_MOUSE	Homeodomain-interacting protein kinase 1 (EC 2.7.11.1) (Nuclear body-associated kinase 2) (Protein kinase Myak)	Hipk1 Kiaa0630 Myak Nbak2	1210	1107.6	49.73	High	0	6.2e-07	79.4	0.05	30	0.09	H-2 Db
Y3	MHC-DB	Medium	MTWFLFGV	8	1xOxidation [M1]	1	1	O88932	KCJ15_MOUSE	ATP-sensitive inward rectifier potassium channel 15 (Inward rectifier K(+) channel Kir4.2) (Potassium channel, inwardly rectifying subfamily J member 15)	Kcnj15	375	1016.49	11.85	Medium	0.016	0.09212	29387.7	13	856.6	1.6	H-2 Kb
B22	MHC-DB	High	RAIELLEKL	9		1	3	O88952	LIN7C_MOUSE	Protein lin-7 homolog C (Lin-7C) (mLin7C) (Mammalian lin-seven protein 3) (MALS-3) (Vertebrate lin-7 homolog 3) (Veli-3)	Lin7c Mals3 Veli3	197	1084.67	38.97	High	0	5.929e-06	702.6	0.3	2127	3.5	H-2 Db
B22	MHC-DB	High	AMPINKATI	9		1	3	O88967	YMEL1_MOUSE	ATP-dependent zinc metalloprotease YME1L1 (EC 3.4.24.-) (ATP-dependent metalloprotease FtsH1) (YME1-like protein 1)	Yme1l1	715	958.539	25.46	High	0	0.003641	8.9	0.01	2789.6	4	H-2 Db
Y3	MHC-DB	High	IAPSFVKGF	9		1	2	O88967	YMEL1_MOUSE	ATP-dependent zinc metalloprotease YME1L1 (EC 3.4.24.-) (ATP-dependent metalloprotease FtsH1) (YME1-like protein 1)	Yme1l1	715	965.546	23.98	High	0	3.52e-15	39301.9	28	193.5	0.5	H-2 Kb
Y3	MHC-DB	High	KNVTFEHV	8		1	2	O88967	YMEL1_MOUSE	ATP-dependent zinc metalloprotease YME1L1 (EC 3.4.24.-) (ATP-dependent metalloprotease FtsH1) (YME1-like protein 1)	Yme1l1	715	973.51	28.24	High	0.003	0.003654	34518.6	19	302.9	0.7	H-2 Kb
B22	MHC-DB	High	MSVIFNFI	8		1	2	O88987	AKAP3_MOUSE	A-kinase anchor protein 3 (AKAP-3) (A-kinase anchor protein 110 kDa) (AKAP 110) (Protein kinase A-anchoring protein 3) (PRKA3)	Akap3 Akap110	864	970.507	17.01	High	0.002	0.01964	9675	3	142.5	0.4	H-2 Kb
B22	MHC-DB	High	SSVRNSKSL	9		1	2	O89050	MKLN1_MOUSE	Muskelin	Mkln1	735	977.537	22.87	High	0	0.0006137	177.4	0.1	1368	2.5	H-2 Db
B22	MHC-DB	High	QSYLIHEHM	9	1xOxidation [M9]	1	1	O89051	ITM2B_MOUSE	Integral membrane protein 2B (Immature BRI2) (imBRI2) (Protein E25B) (Transmembrane protein BRI) (Bri) [Cleaved into: BRI2, membrane form (Mature BRI2) (mBRI2); BRI2 intracellular domain (BRI2 ICD); BRI2C, soluble form; Bri23 peptide (Bri2-23) (ABri23) (C-terminal peptide) (P23 peptide)]	Itm2b	266	1173.54	11.6	High	0.002	0.01675	9371.3	2.5	105	0.3	H-2 Kb
B22	MHC-DB	High	YMHANGASM	9		1	1	P00158	CYB_MOUSE	Cytochrome b (Complex III subunit 3) (Complex III subunit III) (Cytochrome b-c1 complex subunit 3) (Ubiquinol-cytochrome-c reductase complex cytochrome b subunit)	Mt-Cyb Cob Cytb mt-Cytb Mtcyb	381	981.392	35.11	High	0	0.0004042	7.1	0.01	1937.5	3	H-2 Db
B22	MHC-DB	High	YMHANGASM	9	1xOxidation [M]	1	2	P00158	CYB_MOUSE	Cytochrome b (Complex III subunit 3) (Complex III subunit III) (Cytochrome b-c1 complex subunit 3) (Ubiquinol-cytochrome-c reductase complex cytochrome b subunit)	Mt-Cyb Cob Cytb mt-Cytb Mtcyb	381	997.387	20.8	High	0.002	0.0127	7.1	0.01	1937.5	3	H-2 Db
Y3	MHC-DB	High	KMVKVASL	8		1	1	P00493	HPRT_MOUSE	Hypoxanthine-guanine phosphoribosyltransferase (HGPRT) (HGPRTase) (EC 2.4.2.8) (HPRT B)	Hprt1 Hprt	218	875.538	21.84	High	0	9.98e-16	27831.7	12	602.6	1.2	H-2 Kb
B22	MHC-DB	High	YAASNGVQM	9		1	2	P00860	DCOR_MOUSE	Ornithine decarboxylase (ODC) (EC 4.1.1.17)	Odc1 Odc	461	940.419	21.85	High	0	0.0002653	12.3	0.01	4915.3	6.5	H-2 Db
B22	MHC-DB	High	YAASNGVQM	9	1xOxidation [M9]	1	1	P00860	DCOR_MOUSE	Ornithine decarboxylase (ODC) (EC 4.1.1.17)	Odc1 Odc	461	956.414	20.59	High	0	0.001101	12.3	0.01	4915.3	6.5	H-2 Db
B22	MHC-DB	High	LLVQNTSWM	9		1	1	P01831	THY1_MOUSE	Thy-1 membrane glycoprotein (Thy-1 antigen) (CD antigen CD90)	Thy1 Thy-1	162	1091.56	27.8	High	0	9.556e-05	320.4	0.15	18175	24	H-2 Db
B22	MHC-DB	High	AMAPRTLLL	9	1xOxidation [M2]	1	1	P01900	HA12_MOUSE	H-2 class I histocompatibility antigen, D-D alpha chain (H-2D(D))	H2-D1	365	1001.58	29.71	High	0	0.0003237	32159.4	16	1015.9	1.8	H-2 Kb
B22	MHC-DB	High	AMAPRTLLL	9		1	2	P01900	HA12_MOUSE	H-2 class I histocompatibility antigen, D-D alpha chain (H-2D(D))	H2-D1	365	985.586	26.44	High	0	0.001376	32159.4	16	1015.9	1.8	H-2 Kb
Y3	MHC-DB	High	AMAPRTLLL	9	1xOxidation [M2]	1	1	P01900	HA12_MOUSE	H-2 class I histocompatibility antigen, D-D alpha chain (H-2D(D))	H2-D1	365	1001.58	20.05	High	0.003	0.002351	32159.4	16	1015.9	1.8	H-2 Kb
Y3	MHC-DB	High	AVVAFVMKM	9	1xOxidation [M]	1	2	P01902	HA1D_MOUSE	H-2 class I histocompatibility antigen, K-D alpha chain (H-2K(D))	H2-K1 H2-K	368	1011.54	47.39	High	0	1.55e-12	18771.4	6	339.2	0.8	H-2 Kb
Y3	MHC-DB	High	AVVAFVMKM	9		1	3	P01902	HA1D_MOUSE	H-2 class I histocompatibility antigen, K-D alpha chain (H-2K(D))	H2-K1 H2-K	368	995.542	47.12	High	0	1.23e-15	18771.4	6	339.2	0.8	H-2 Kb
Y3	MHC-DB	High	VVYPWTQRF	9		1	4	P02100	HBE_HUMAN	Hemoglobin subunit epsilon (Epsilon-globin) (Hemoglobin epsilon chain)	HBE1 HBE	147	1195.63	30.71	High	0.002	0.000932	36366.2	22	49.9	0.15	H-2 Kb
Y3	MHC-DB	Medium	ITMSSTNLM	9	2xOxidation [M3; M9]	1	1	P03893	NU2M_MOUSE	NADH-ubiquinone oxidoreductase chain 2 (EC 1.6.5.3) (NADH dehydrogenase subunit 2)	Mtnd2 mt-Nd2 Nd2	345	1029.46	14.01	Medium	0.014	0.02739	5623.8	1.5	946.2	1.7	H-2 Db
Y3	MHC-DB	High	AIISFSLL	8		1	3	P03985	TCC2_MOUSE	T-cell receptor gamma chain C region C7.5		172	863.524	40.18	High	0	9.98e-16	16956.5	5.5	8.1	0.025	H-2 Kb
Y3	MHC-DB	Medium	MAHNREEL	8	1xOxidation [M1]	1	1	P04919	B3AT_MOUSE	Band 3 anion transport protein (Anion exchange protein 1) (AE 1) (Anion exchanger 1) (MEB3) (Solute carrier family 4 member 1) (CD antigen CD233)	Slc4a1 Ae1	929	1015.46	10.74	Medium	0.023	0.09288	3381.9	0.9	9276.4	12	H-2 Db
Y3	MHC-DB	High	VNFPFLVKL	9		1	5	P05132	KAPCA_MOUSE	cAMP-dependent protein kinase catalytic subunit alpha (PKA C-alpha) (EC 2.7.11.11)	Prkaca Pkaca	351	1076.65	58	High	0	9.98e-16	15956	5	15.1	0.05	H-2 Kb
Y3	MHC-DB	High	IERPTYTNL	9		1	3	P05214	TBA3_MOUSE	Tubulin alpha-3 chain (Alpha-tubulin 3/7) (Alpha-tubulin isotype M-alpha-3/7) (Tubulin alpha-3/alpha-7 chain)	Tuba3a Tuba3; Tuba3b Tuba7	450	1106.58	33.91	High	0	7.406e-05	42811.3	39	848.9	1.6	H-2 Kb
B22	MHC-DB	High	MRYVASYLL	9		1	3	P05387	RLA2_HUMAN	60S acidic ribosomal protein P2 (Renal carcinoma antigen NY-REN-44)	RPLP2 D11S2243E RPP2	115	1115.59	28.4	High	0	0.001945	30582.4	15	781.5	1.5	H-2 Kb
B22	MHC-DB	High	MRYVASYLL	9	1xOxidation [M1]	1	2	P05387	RLA2_HUMAN	60S acidic ribosomal protein P2 (Renal carcinoma antigen NY-REN-44)	RPLP2 D11S2243E RPP2	115	1131.59	25.8	High	0	0.0005236	30582.4	15	781.5	1.5	H-2 Kb
Y3	MHC-DB	High	MRYVASYLL	9		1	4	P05387	RLA2_HUMAN	60S acidic ribosomal protein P2 (Renal carcinoma antigen NY-REN-44)	RPLP2 D11S2243E RPP2	115	1115.59	28.79	High	0	1.07e-14	30582.4	15	781.5	1.5	H-2 Kb
Y3	MHC-DB	Medium	VSTSVNSMWL	10	1xOxidation [M8]	1	1	P05532	KIT_MOUSE	Mast/stem cell growth factor receptor Kit (SCFR) (EC 2.7.10.1) (Proto-oncogene c-Kit) (Tyrosine-protein kinase Kit) (CD antigen CD117)	Kit Sl	979	1139.54	11.78	Medium	0.038	0.3489	1855.1	0.6	10045.8	13	H-2 Db
B22	MHC-DB	High	QAPQNKITV	9		1	5	P06151	LDHA_MOUSE	L-lactate dehydrogenase A chain (LDH-A) (EC 1.1.1.27) (LDH muscle subunit) (LDH-M)	Ldha Ldh-1 Ldh1	332	998.563	35.23	High	0	4.067e-05	59.1	0.04	9987.4	13	H-2 Db
Y3	MHC-DB	Medium	QAPQNKITV	9		1	2	P06151	LDHA_MOUSE	L-lactate dehydrogenase A chain (LDH-A) (EC 1.1.1.27) (LDH muscle subunit) (LDH-M)	Ldha Ldh-1 Ldh1	332	998.563	21.67	Medium	0.024	0.119	59.1	0.04	9987.4	13	H-2 Db
B22	MHC-DB	High	KNLVNKEVM	9	1xOxidation [M9]	1	4	P06745	G6PI_MOUSE	Glucose-6-phosphate isomerase (GPI) (EC 5.3.1.9) (Autocrine motility factor) (AMF) (Neuroleukin) (NLK) (Phosphoglucose isomerase) (PGI) (Phosphohexose isomerase) (PHI)	Gpi Gpi1	558	1090.59	54.51	High	0	5.198e-05	91.4	0.06	6747	9	H-2 Db
B22	MHC-DB	High	KNLVNKEVM	9		1	7	P06745	G6PI_MOUSE	Glucose-6-phosphate isomerase (GPI) (EC 5.3.1.9) (Autocrine motility factor) (AMF) (Neuroleukin) (NLK) (Phosphoglucose isomerase) (PGI) (Phosphohexose isomerase) (PHI)	Gpi Gpi1	558	1074.6	43.83	High	0	6.249e-05	91.4	0.06	6747	9	H-2 Db
Y3	MHC-DB	High	KNLVNKEVM	9		1	2	P06745	G6PI_MOUSE	Glucose-6-phosphate isomerase (GPI) (EC 5.3.1.9) (Autocrine motility factor) (AMF) (Neuroleukin) (NLK) (Phosphoglucose isomerase) (PGI) (Phosphohexose isomerase) (PHI)	Gpi Gpi1	558	1074.6	27.84	High	0.003	0.0203	91.4	0.06	6747	9	H-2 Db
B22	MHC-DB	High	STVRNADVI	9		1	2	P06795	MDR1B_MOUSE	Multidrug resistance protein 1B (EC 3.6.3.44) (ATP-binding cassette sub-family B member 1B) (P-glycoprotein 1) (CD antigen CD243)	Abcb1b Abcb1 Mdr1 Mdr1b Pgy1 Pgy1-1	1276	974.527	27.19	High	0.003	0.03167	7	0.01	11382.6	15	H-2 Db
Y3	MHC-DB	High	STVRNADVI	9		1	3	P06795	MDR1B_MOUSE	Multidrug resistance protein 1B (EC 3.6.3.44) (ATP-binding cassette sub-family B member 1B) (P-glycoprotein 1) (CD antigen CD243)	Abcb1b Abcb1 Mdr1 Mdr1b Pgy1 Pgy1-1	1276	974.527	32.28	High	0.003	0.003654	7	0.01	11382.6	15	H-2 Db
B22	MHC-DB	Medium	AAHCFIQL	8		1	1	P06869	UROK_MOUSE	Urokinase-type plasminogen activator (U-plasminogen activator) (uPA) (EC 3.4.21.73) [Cleaved into: Urokinase-type plasminogen activator long chain A; Urokinase-type plasminogen activator short chain A; Urokinase-type plasminogen activator chain B]	Plau	433	902.455	13.75	Medium	0.036	0.2275	14246.1	4.5	87.3	0.25	H-2 Kb
B22	MHC-DB	High	NAIKNHWNSTM	11		1	1	P06876	MYB_MOUSE	Transcriptional activator Myb (Proto-oncogene c-Myb)	Myb	636	1315.62	10.42	High	0.003	0.02771	271.7	0.15	15970.5	21	H-2 Db
Y3	MHC-DB	Medium	NAIKNHWNSTM	11		1	1	P06876	MYB_MOUSE	Transcriptional activator Myb (Proto-oncogene c-Myb)	Myb	636	1315.62	11.93	Medium	0.023	0.09801	271.7	0.15	15970.5	21	H-2 Db
B22	MHC-DB	High	YGIRNSLLI	9		1	2	P07742	RIR1_MOUSE	Ribonucleoside-diphosphate reductase large subunit (EC 1.17.4.1) (Ribonucleoside-diphosphate reductase subunit M1) (Ribonucleotide reductase large subunit)	Rrm1	792	1048.61	29.4	High	0	0.0004099	12	0.01	3576	5	H-2 Db
Y3	MHC-DB	High	YGIRNSLLI	9		1	2	P07742	RIR1_MOUSE	Ribonucleoside-diphosphate reductase large subunit (EC 1.17.4.1) (Ribonucleoside-diphosphate reductase subunit M1) (Ribonucleotide reductase large subunit)	Rrm1	792	1048.61	21.12	High	0	9.98e-16	12	0.01	3576	5	H-2 Db
B22	MHC-DB	High	FQIVNPHLL	9		1	6	P07742	RIR1_MOUSE	Ribonucleoside-diphosphate reductase large subunit (EC 1.17.4.1) (Ribonucleoside-diphosphate reductase subunit M1) (Ribonucleotide reductase large subunit)	Rrm1	792	1080.62	37.8	High	0	0.0002313	7.6	0.01	4427.7	6	H-2 Db
Y3	MHC-DB	High	FQIVNPHLL	9		1	6	P07742	RIR1_MOUSE	Ribonucleoside-diphosphate reductase large subunit (EC 1.17.4.1) (Ribonucleoside-diphosphate reductase subunit M1) (Ribonucleotide reductase large subunit)	Rrm1	792	1080.62	45.71	High	0	9.98e-16	7.6	0.01	4427.7	6	H-2 Db
Y3	MHC-DB	High	HTYDFEKL	8		1	4	P07742	RIR1_MOUSE	Ribonucleoside-diphosphate reductase large subunit (EC 1.17.4.1) (Ribonucleoside-diphosphate reductase subunit M1) (Ribonucleotide reductase large subunit)	Rrm1	792	1052.5	28.47	High	0	4.23e-11	31513.2	16	90.4	0.25	H-2 Kb
B22	MHC-DB	High	FIMDNCEELI	10	1xOxidation [M3]	1	1	P07901	HS90A_MOUSE	Heat shock protein HSP 90-alpha (Heat shock 86 kDa) (HSP 86) (HSP86) (Tumor-specific transplantation 86 kDa antigen) (TSTA)	Hsp90aa1 Hsp86 Hsp86-1 Hspca	733	1242.54	10.79	High	0.009	0.0778	4969.1	1.3	13718.5	18	H-2 Db
B22	MHC-DB	High	SQFINFPIYV	10		1	1	P08113	ENPL_MOUSE	Endoplasmin (94 kDa glucose-regulated protein) (GRP-94) (Endoplasmic reticulum resident protein 99) (ERp99) (Heat shock protein 90 kDa beta member 1) (Polymorphic tumor rejection antigen 1) (Tumor rejection antigen gp96)	Hsp90b1 Grp94 Tra-1 Tra1	802	1227.64	11.59	High	0	0.0004373	180.2	0.1	803.1	1.5	H-2 Db
B22	MHC-DB	High	VVVENGELI	9		1	2	P08775	RPB1_MOUSE	DNA-directed RNA polymerase II subunit RPB1 (RNA polymerase II subunit B1) (EC 2.7.7.6) (DNA-directed RNA polymerase II subunit A) (DNA-directed RNA polymerase III largest subunit)	Polr2a Rpii215 Rpo2-1	1970	971.541	50.71	High	0	1.984e-06	215.2	0.125	4225.9	6	H-2 Db
B22	MHC-DB	High	VTPFNIDRL	9		1	1	P08775	RPB1_MOUSE	DNA-directed RNA polymerase II subunit RPB1 (RNA polymerase II subunit B1) (EC 2.7.7.6) (DNA-directed RNA polymerase II subunit A) (DNA-directed RNA polymerase III largest subunit)	Polr2a Rpii215 Rpo2-1	1970	1074.59	16.39	High	0	0.0009362	578.1	0.25	690.5	1.4	H-2 Db
Y3	MHC-DB	High	VNYRHLAL	8		1	3	P08775	RPB1_MOUSE	DNA-directed RNA polymerase II subunit RPB1 (RNA polymerase II subunit B1) (EC 2.7.7.6) (DNA-directed RNA polymerase II subunit A) (DNA-directed RNA polymerase III largest subunit)	Polr2a Rpii215 Rpo2-1	1970	985.558	41.76	High	0	1.44e-11	21169.1	7.5	3.3	0.01	H-2 Kb
Y3	MHC-DB	High	VNYRHLALL	9		1	6	P08775	RPB1_MOUSE	DNA-directed RNA polymerase II subunit RPB1 (RNA polymerase II subunit B1) (EC 2.7.7.6) (DNA-directed RNA polymerase II subunit A) (DNA-directed RNA polymerase III largest subunit)	Polr2a Rpii215 Rpo2-1	1970	1098.64	41.87	High	0	2.57e-11	6672.8	1.7	3.7	0.01	H-2 Kb
Y3	MHC-DB	High	SVVLMSHL	8		1	2	P09041	PGK2_MOUSE	Phosphoglycerate kinase 2 (EC 2.7.2.3) (Phosphoglycerate kinase, testis specific)	Pgk2 Pgk-2	417	885.486	32.01	High	0	3.33e-07	18768.4	6	82.6	0.25	H-2 Kb
Y3	MHC-DB	High	RILEFFGL	8		1	3	P09103	PDIA1_MOUSE	Protein disulfide-isomerase (PDI) (EC 5.3.4.1) (Cellular thyroid hormone-binding protein) (Endoplasmic reticulum resident protein 59) (ER protein 59) (ERp59) (Prolyl 4-hydroxylase subunit beta) (p55)	P4hb Pdia1	509	994.572	36.18	High	0	1.65e-08	32657	17	17.3	0.05	H-2 Kb
B22	MHC-DB	High	AGPSNFGTEL	10		1	1	P0C090	RC3H2_MOUSE	Roquin-2 (EC 6.3.2.-) (Membrane-associated nucleic acid-binding protein) (RING finger and CCCH-type zinc finger domain-containing protein 2)	Rc3h2 Mnab	1187	992.468	31.29	High	0.002	0.01296	105	0.07	5288.2	7	H-2 Db
Y3	MHC-DB	High	PVYVFFHL	8		1	1	P0C1P0	PIGY_MOUSE	Phosphatidylinositol N-acetylglucosaminyltransferase subunit Y (Phosphatidylinositol-glycan biosynthesis class Y protein) (PIG-Y)	Pigy Pigyl	71	1021.55	21.74	High	0.003	0.000932	21811	7.5	28.6	0.09	H-2 Kb
B22	MHC-DB	High	PMYTFTKLL	9	1xOxidation [M2]	1	1	P0C5E4	PTPRQ_MOUSE	Phosphatidylinositol phosphatase PTPRQ (EC 3.1.3.-) (Receptor-type tyrosine-protein phosphatase Q) (PTP-RQ) (R-PTP-Q) (EC 3.1.3.48)	Ptprq	2300	1129.6	11.41	High	0.001	0.006675	24147.7	9	200	0.5	H-2 Kb
B22	MHC-DB	High	FAPVNVTTEV	10		1	3	P10126	EF1A1_MOUSE	Elongation factor 1-alpha 1 (EF-1-alpha-1) (Elongation factor Tu) (EF-Tu) (Eukaryotic elongation factor 1 A-1) (eEF1A-1)	Eef1a1 Eef1a	462	1076.56	44.14	High	0	0.0002425	6.4	0.01	17923.5	24	H-2 Db
B22	MHC-DB	High	FAPVNVTTE	9		1	2	P10126	EF1A1_MOUSE	Elongation factor 1-alpha 1 (EF-1-alpha-1) (Elongation factor Tu) (EF-Tu) (Eukaryotic elongation factor 1 A-1) (eEF1A-1)	Eef1a1 Eef1a	462	977.494	28.12	High	0	0.0001002	92.2	0.06	22707.3	32	H-2 Db
B22	MHC-DB	High	KTHINIVVI	9		1	2	P10126	EF1A1_MOUSE	Elongation factor 1-alpha 1 (EF-1-alpha-1) (Elongation factor Tu) (EF-Tu) (Eukaryotic elongation factor 1 A-1) (eEF1A-1)	Eef1a1 Eef1a	462	1036.65	30.95	High	0	3.25e-05	93.2	0.06	6099.3	8	H-2 Db
Y3	MHC-DB	High	RSPWFTTLI	9		1	3	P10404	ENV1_MOUSE	MLV-related proviral Env polyprotein [Cleaved into: Surface protein (SU); Transmembrane protein (TM)]		641	1120.62	39.85	High	0	4.531e-06	2435.5	0.7	184.6	0.5	H-2 Kb
Y3	MHC-DB	High	RSPWFTTL	8		1	3	P10404	ENV1_MOUSE	MLV-related proviral Env polyprotein [Cleaved into: Surface protein (SU); Transmembrane protein (TM)]		641	1007.53	24.94	High	0	9.275e-05	8927.8	2.5	11	0.03	H-2 Kb
Y3	MHC-DB	High	LTQQYHQL	8		1	2	P10404	ENV1_MOUSE	MLV-related proviral Env polyprotein [Cleaved into: Surface protein (SU); Transmembrane protein (TM)]		641	1030.53	43.06	High	0	9.98e-16	36869.8	23	206.2	0.5	H-2 Kb
Y3	MHC-DB	High	SGYFHPLL	8		1	1	P10518	HEM2_MOUSE	Delta-aminolevulinic acid dehydratase (ALADH) (EC 4.2.1.24) (Porphobilinogen synthase)	Alad Lv	330	933.483	19.48	High	0	2.49e-06	19312.2	6.5	12.1	0.04	H-2 Kb
B22	MHC-DB	High	FSGANKEKL	9		1	2	P10639	THIO_MOUSE	Thioredoxin (Trx) (ATL-derived factor) (ADF)	Txn Txn1	105	993.536	24.33	High	0	7.413e-06	184.1	0.1	12095.5	16	H-2 Db
Y3	MHC-DB	Medium	VVFLEVDV	8		1	1	P10639	THIO_MOUSE	Thioredoxin (Trx) (ATL-derived factor) (ADF)	Txn Txn1	105	919.514	12.65	Medium	0.022	0.09212	36696.3	23	985.6	1.8	H-2 Kb
B22	MHC-DB	High	SMAKLRERL	9		1	1	P11370	ENV2_MOUSE	Retrovirus-related Env polyprotein from Fv-4 locus	Fv4 Env	679	1103.64	15.04	High	0.003	0.03209	8597.7	2.5	1158.9	2	H-2 Kb
Y3	MHC-DB	High	ATQQFQQL	8		1	3	P11370	ENV2_MOUSE	Retrovirus-related Env polyprotein from Fv-4 locus	Fv4 Env	679	963.489	32.21	High	0	9.98e-16	30002	14	67.6	0.2	H-2 Kb
Y3	MHC-DB	High	VVLLFETAL	9		1	2	P11499	HS90B_MOUSE	Heat shock protein HSP 90-beta (Heat shock 84 kDa) (HSP 84) (HSP84) (Tumor-specific transplantation 84 kDa antigen) (TSTA)	Hsp90ab1 Hsp84 Hsp84-1 Hspcb	724	1004.6	16.19	High	0	9.98e-16	6804.5	1.8	21.2	0.06	H-2 Kb
B22	MHC-DB	Medium	QSLALFTPAL	10		1	1	P11859	ANGT_MOUSE	Angiotensinogen (Serpin A8) [Cleaved into: Angiotensin-1 (Angiotensin 1-10) (Angiotensin I) (Ang I); Angiotensin-2 (Angiotensin 1-8) (Angiotensin II) (Ang II); Angiotensin-3 (Angiotensin 2-8) (Angiotensin III) (Ang III) (Des-Asp[1]-angiotensin II); Angiotensin-4 (Angiotensin 3-8) (Angiotensin IV) (Ang IV); Angiotensin 1-9; Angiotensin 1-7; Angiotensin 1-5; Angiotensin 1-4]	Agt Serpina8	477	1060.6	15.29	Medium	0.045	0.2652	2118.3	0.6	467.3	1	H-2 Db
Y3	MHC-DB	High	SSYNYRVV	8		1	1	P11881	ITPR1_MOUSE	Inositol 1,4,5-trisphosphate receptor type 1 (IP3 receptor isoform 1) (IP3R 1) (InsP3R1) (Inositol 1,4,5-trisphosphate-binding protein P400) (Protein PCD-6) (Purkinje cell protein 1) (Type 1 inositol 1,4,5-trisphosphate receptor) (Type 1 InsP3 receptor)	Itpr1 Insp3r Pcd6 Pcp1	2749	987.489	26.39	High	0	9.98e-16	5869	1.5	5.4	0.015	H-2 Kb
B22	MHC-DB	High	IIGINGDYF	9		1	2	P11983	TCPA_MOUSE	T-complex protein 1 subunit alpha (TCP-1-alpha) (CCT-alpha) (Tailless complex polypeptide 1A) (TCP-1-A) (Tailless complex polypeptide 1B) (TCP-1-B)	Tcp1 Cct1 Ccta	556	1011.51	34.2	High	0	0.000135	2763.3	0.8	6709.7	9	H-2 Db
B22	MHC-DB	High	SMLINGYAL	9		1	3	P11983	TCPA_MOUSE	T-complex protein 1 subunit alpha (TCP-1-alpha) (CCT-alpha) (Tailless complex polypeptide 1A) (TCP-1-A) (Tailless complex polypeptide 1B) (TCP-1-B)	Tcp1 Cct1 Ccta	556	981.507	49.04	High	0	7.316e-06	5.5	0.01	581.4	1.2	H-2 Db
B22	MHC-DB	High	SMLINGYAL	9	1xOxidation [M2]	1	2	P11983	TCPA_MOUSE	T-complex protein 1 subunit alpha (TCP-1-alpha) (CCT-alpha) (Tailless complex polypeptide 1A) (TCP-1-A) (Tailless complex polypeptide 1B) (TCP-1-B)	Tcp1 Cct1 Ccta	556	997.502	28.1	High	0	0.0004177	5.5	0.01	581.4	1.2	H-2 Db
Y3	MHC-DB	High	FALRYLNFF	9		1	1	P12004	PCNA_HUMAN	Proliferating cell nuclear antigen (PCNA) (Cyclin)	PCNA	261	1190.64	10.68	High	0	3.9e-10	1115.2	0.4	468.3	1	H-2 Db
B22	MHC-DB	Medium	MANTMFAL	8	2xOxidation [M1; M5]	1	2	P12388	PAI2_MOUSE	Plasminogen activator inhibitor 2, macrophage (PAI-2) (Serpin B2)	Serpinb2 Pai2 Planh2	415	930.406	15.44	Medium	0.018	0.1389	17098.7	5.5	412.1	0.9	H-2 Kb
Y3	MHC-DB	High	MANTMFAL	8	2xOxidation [M1; M5]	1	5	P12388	PAI2_MOUSE	Plasminogen activator inhibitor 2, macrophage (PAI-2) (Serpin B2)	Serpinb2 Pai2 Planh2	415	930.406	11.75	High	0.003	0.003654	17098.7	5.5	412.1	0.9	H-2 Kb
B22	MHC-DB	High	SQVENPTASHV	11		1	4	P13379	CD5_MOUSE	T-cell surface glycoprotein CD5 (Lymphocyte antigen 1) (Ly-1) (Lyt-1) (CD antigen CD5)	Cd5 Ly-1	494	1168.56	38	High	0	9.529e-05	1035.4	0.4	28468.5	44	H-2 Db
Y3	MHC-DB	High	SIQNFSKL	8		1	1	P13405	RB_MOUSE	Retinoblastoma-associated protein (pRb) (Rb) (pp105)	Rb1 Rb-1	921	936.515	22.46	High	0	9.98e-16	2483.9	0.7	18.8	0.06	H-2 Kb
Y3	MHC-DB	High	SVYKFFDL	8		1	4	P13405	RB_MOUSE	Retinoblastoma-associated protein (pRb) (Rb) (pp105)	Rb1 Rb-1	921	1018.52	33.82	High	0	3.474e-06	10845.9	3	4.1	0.01	H-2 Kb
Y3	MHC-DB	High	KAFDFYKV	8		1	1	P13405	RB_MOUSE	Retinoblastoma-associated protein (pRb) (Rb) (pp105)	Rb1 Rb-1	921	1017.54	11.4	High	0.003	0.0009359	22068.4	8	60.3	0.175	H-2 Kb
B22	MHC-DB	High	TTVTNPEPM	9		1	5	P13864	DNMT1_MOUSE	DNA (cytosine-5)-methyltransferase 1 (Dnmt1) (Met-1) (EC 2.1.1.37) (DNA methyltransferase MmuI) (DNA MTase MmuI) (M.MmuI) (MCMT)	Dnmt1 Dnmt Met1 Uim	1620	989.461	46.7	High	0	1.329e-05	18.9	0.015	4787.1	6.5	H-2 Db
B22	MHC-DB	High	TTVTNPEPM	9	1xOxidation [M9]	1	3	P13864	DNMT1_MOUSE	DNA (cytosine-5)-methyltransferase 1 (Dnmt1) (Met-1) (EC 2.1.1.37) (DNA methyltransferase MmuI) (DNA MTase MmuI) (M.MmuI) (MCMT)	Dnmt1 Dnmt Met1 Uim	1620	1005.46	34.51	High	0	0.0001207	18.9	0.015	4787.1	6.5	H-2 Db
Y3	MHC-DB	High	TTVTNPEPM	9		1	1	P13864	DNMT1_MOUSE	DNA (cytosine-5)-methyltransferase 1 (Dnmt1) (Met-1) (EC 2.1.1.37) (DNA methyltransferase MmuI) (DNA MTase MmuI) (M.MmuI) (MCMT)	Dnmt1 Dnmt Met1 Uim	1620	989.461	15.46	High	0.003	0.003654	18.9	0.015	4787.1	6.5	H-2 Db
B22	MHC-DB	High	LSLENGTHTL	10		1	4	P13864	DNMT1_MOUSE	DNA (cytosine-5)-methyltransferase 1 (Dnmt1) (Met-1) (EC 2.1.1.37) (DNA methyltransferase MmuI) (DNA MTase MmuI) (M.MmuI) (MCMT)	Dnmt1 Dnmt Met1 Uim	1620	1084.56	43.32	High	0	7.7e-07	60.4	0.04	10775.3	14	H-2 Db
Y3	MHC-DB	High	LSLENGTHTL	10		1	3	P13864	DNMT1_MOUSE	DNA (cytosine-5)-methyltransferase 1 (Dnmt1) (Met-1) (EC 2.1.1.37) (DNA methyltransferase MmuI) (DNA MTase MmuI) (M.MmuI) (MCMT)	Dnmt1 Dnmt Met1 Uim	1620	1084.56	48.65	High	0	9.98e-16	60.4	0.04	10775.3	14	H-2 Db
Y3	MHC-DB	High	LQYTFHDV	8		1	1	P13864	DNMT1_MOUSE	DNA (cytosine-5)-methyltransferase 1 (Dnmt1) (Met-1) (EC 2.1.1.37) (DNA methyltransferase MmuI) (DNA MTase MmuI) (M.MmuI) (MCMT)	Dnmt1 Dnmt Met1 Uim	1620	1022.49	14.53	High	0.005	0.02739	21319.9	7.5	161.7	0.5	H-2 Kb
B22	MHC-DB	High	RQIFNGTFV	9		1	1	P14148	RL7_MOUSE	60S ribosomal protein L7	Rpl7	270	1081.58	17.73	High	0.001	0.005952	9	0.01	12280.7	16	H-2 Db
Y3	MHC-DB	High	VIFNYKGKNV	10		1	2	P14211	CALR_MOUSE	Calreticulin (CRP55) (Calregulin) (Endoplasmic reticulum resident protein 60) (ERp60) (HACBP)	Calr	416	1181.67	41.23	High	0	9.98e-16	42245.8	37	122.2	0.4	H-2 Kb
B22	MHC-DB	High	FAYEGRDYI	9		1	6	P14431	HA19_MOUSE	H-2 class I histocompatibility antigen, Q9 alpha chain (Fragment)	H2-Q9	200	1133.53	33.65	High	0	0.0001742	38	0.025	3665	5.5	H-2 Db
Y3	MHC-DB	High	FAYEGRDYI	9		1	3	P14431	HA19_MOUSE	H-2 class I histocompatibility antigen, Q9 alpha chain (Fragment)	H2-Q9	200	1133.53	34.53	High	0	9.98e-16	38	0.025	3665	5.5	H-2 Db
B22	MHC-DB	High	ATIINEEVL	9		1	4	P14576	SRP54_MOUSE	Signal recognition particle 54 kDa protein (SRP54)	Srp54	504	1001.55	37.53	High	0	1.702e-05	36.7	0.025	6173.1	8	H-2 Db
Y3	MHC-DB	High	RVYEFLDKL	9		1	8	P14685	PSMD3_MOUSE	26S proteasome non-ATPase regulatory subunit 3 (26S proteasome regulatory subunit RPN3) (26S proteasome regulatory subunit S3) (Proteasome subunit p58) (Transplantation antigen P91A) (Tum-P91A antigen)	Psmd3 P91a Tstap91a	530	1182.65	35.52	High	0	1.22e-14	6406.6	1.7	34.9	0.125	H-2 Kb
B22	MHC-DB	High	LTLPMYLTV	9		1	1	P14719	ILRL1_MOUSE	Interleukin-1 receptor-like 1 (Interleukin-33 receptor alpha chain) (Lymphocyte antigen 84) (Protein ST2) (Protein T1)	Il1rl1 Ly84 St2 Ste2	567	1050.59	10.83	High	0.006	0.05876	14442.3	4.5	790.9	1.5	H-2 Kb
B22	MHC-DB	High	IQAENAEFM	9	1xOxidation [M9]	1	4	P14901	HMOX1_MOUSE	Heme oxygenase 1 (HO-1) (EC 1.14.14.18) (P32 protein)	Hmox1	289	1068.47	59.93	High	0	7.066e-06	62.6	0.04	15772	21	H-2 Db
B22	MHC-DB	High	IQAENAEFM	9		1	5	P14901	HMOX1_MOUSE	Heme oxygenase 1 (HO-1) (EC 1.14.14.18) (P32 protein)	Hmox1	289	1052.47	51.71	High	0	2.033e-05	62.6	0.04	15772	21	H-2 Db
Y3	MHC-DB	High	IQAENAEFM	9		1	2	P14901	HMOX1_MOUSE	Heme oxygenase 1 (HO-1) (EC 1.14.14.18) (P32 protein)	Hmox1	289	1052.47	45.65	High	0	9.98e-16	62.6	0.04	15772	21	H-2 Db
Y3	MHC-DB	Medium	QNPVYAPL	8		1	2	P14901	HMOX1_MOUSE	Heme oxygenase 1 (HO-1) (EC 1.14.14.18) (P32 protein)	Hmox1	289	901.478	14.33	Medium	0.017	0.09212	26803.8	11	5.2	0.015	H-2 Kb
B22	MHC-DB	High	FGIKNMDQV	9		1	1	P15037	ETS2_MOUSE	Protein C-ets-2	Ets2	468	1051.52	37.93	High	0	1.156e-05	11.1	0.01	7741.7	10	H-2 Db
Y3	MHC-DB	High	ETPVYANL	8		1	2	P15066	JUND_MOUSE	Transcription factor jun-D	Jund Jun-d Jund1	341	906.457	26.69	High	0.003	0.0025	43654.2	42	42.8	0.125	H-2 Kb
Y3	MHC-DB	High	TQFLYPKV	8		1	1	P15066	JUND_MOUSE	Transcription factor jun-D	Jund Jun-d Jund1	341	995.556	30.17	High	0.002	0.000932	29191.9	13	68.3	0.2	H-2 Kb
B22	MHC-DB	High	RSHLNSIKAYI	11		1	3	P15089	CBPA3_MOUSE	Mast cell carboxypeptidase A (MC-CPA) (EC 3.4.17.1) (Carboxypeptidase A3)	Cpa3	417	1301.73	36.46	High	0	8.12e-09	336.9	0.175	14280.1	19	H-2 Db
B22	MHC-DB	High	KAVTNFIRSHL	11		1	5	P15089	CBPA3_MOUSE	Mast cell carboxypeptidase A (MC-CPA) (EC 3.4.17.1) (Carboxypeptidase A3)	Cpa3	417	1285.74	41.25	High	0	5.74e-07	647.4	0.3	2266.3	3.5	H-2 Db
Y3	MHC-DB	High	FTYGFFKI	8		1	1	P15307	REL_MOUSE	Proto-oncogene c-Rel	Rel	587	1022.53	24.17	High	0.003	0.000932	15242.2	4.5	134.4	0.4	H-2 Kb
B22	MHC-DB	High	MLIKLLEVL	9	1xOxidation [M1]	1	1	P15508	SPTB1_MOUSE	Spectrin beta chain, erythrocytic (Beta-I spectrin)	Sptb Spnb-1 Spnb1 Sptb1	2128	1087.68	44.69	High	0	1.033e-05	6873.4	1.8	8640.7	11	H-2 Db
Y3	MHC-DB	High	SAYEVIKL	8		1	3	P16125	LDHB_MOUSE	L-lactate dehydrogenase B chain (LDH-B) (EC 1.1.1.27) (LDH heart subunit) (LDH-H)	Ldhb Ldh-2 Ldh2	334	922.524	53.59	High	0	6.6e-12	19932.7	6.5	56.8	0.175	H-2 Kb
B22	MHC-DB	High	KALINADEL	9		2	4	P16546	SPTN1_MOUSE	Spectrin alpha chain, non-erythrocytic 1 (Alpha-II spectrin) (Fodrin alpha chain)	Sptan1 Spna2 Spta2	2472	986.552	40.87	High	0	0.0004742	5.5	0.01	3779.5	5.5	H-2 Db
B22	MHC-DB	High	SQLRNADVEL	10		1	1	P17426	AP2A1_MOUSE	AP-2 complex subunit alpha-1 (100 kDa coated vesicle protein A) (Adaptor protein complex AP-2 subunit alpha-1) (Adaptor-related protein complex 2 subunit alpha-1) (Alpha-adaptin A) (Alpha1-adaptin) (Clathrin assembly protein complex 2 alpha-A large chain) (Plasma membrane adaptor HA2/AP2 adaptin alpha A subunit)	Ap2a1 Adtaa Clapa1	977	1144.6	31.79	High	0	6.571e-05	18.2	0.01	13069.7	17	H-2 Db
Y3	MHC-DB	High	VWYRVIQI	8		2	8	P17426	AP2A1_MOUSE	AP-2 complex subunit alpha-1 (100 kDa coated vesicle protein A) (Adaptor protein complex AP-2 subunit alpha-1) (Adaptor-related protein complex 2 subunit alpha-1) (Alpha-adaptin A) (Alpha1-adaptin) (Clathrin assembly protein complex 2 alpha-A large chain) (Plasma membrane adaptor HA2/AP2 adaptin alpha A subunit)	Ap2a1 Adtaa Clapa1	977	1076.63	30.43	High	0.003	0.000932	35603.9	21	155.6	0.4	H-2 Kb
Y3	MHC-DB	High	TNLRYLAL	8		1	1	P17426	AP2A1_MOUSE	AP-2 complex subunit alpha-1 (100 kDa coated vesicle protein A) (Adaptor protein complex AP-2 subunit alpha-1) (Adaptor-related protein complex 2 subunit alpha-1) (Alpha-adaptin A) (Alpha1-adaptin) (Clathrin assembly protein complex 2 alpha-A large chain) (Plasma membrane adaptor HA2/AP2 adaptin alpha A subunit)	Ap2a1 Adtaa Clapa1	977	963.562	16.87	High	0.003	0.01246	32735.9	17	9.1	0.025	H-2 Kb
B22	MHC-DB	High	SQLKNADVEL	10		1	2	P17427	AP2A2_MOUSE	AP-2 complex subunit alpha-2 (100 kDa coated vesicle protein C) (Adaptor protein complex AP-2 subunit alpha-2) (Adaptor-related protein complex 2 subunit alpha-2) (Alpha-adaptin C) (Alpha2-adaptin) (Clathrin assembly protein complex 2 alpha-C large chain) (Plasma membrane adaptor HA2/AP2 adaptin alpha C subunit)	Ap2a2 Adtab	938	1116.59	39.14	High	0	0.00033	31.7	0.025	14502.6	19	H-2 Db
B22	MHC-DB	High	RALLLSTYI	9		1	2	P17427	AP2A2_MOUSE	AP-2 complex subunit alpha-2 (100 kDa coated vesicle protein C) (Adaptor protein complex AP-2 subunit alpha-2) (Adaptor-related protein complex 2 subunit alpha-2) (Alpha-adaptin C) (Alpha2-adaptin) (Clathrin assembly protein complex 2 alpha-C large chain) (Plasma membrane adaptor HA2/AP2 adaptin alpha C subunit)	Ap2a2 Adtab	938	1049.64	20.14	High	0.001	0.0061	57.5	0.04	1949.2	3	H-2 Db
B22	MHC-DB	High	NFPENHFTEL	10		1	4	P17433	SPI1_MOUSE	Transcription factor PU.1 (31 kDa-transforming protein) (SFFV proviral integration 1 protein)	Spi1 Sfpi-1 Sfpi1	272	1247.57	21.1	High	0.001	0.01003	5258.2	1.4	6862	9	H-2 Db
B22	MHC-DB	High	FSVENKWRL	9		1	8	P17665	COX7C_MOUSE	Cytochrome c oxidase subunit 7C, mitochondrial (Cytochrome c oxidase polypeptide VIIc)	Cox7c Cox7c1	63	1178.63	32.63	High	0	0.0001389	170.4	0.1	4676.5	6.5	H-2 Db
Y3	MHC-DB	Medium	FSVENKWRL	9		1	1	P17665	COX7C_MOUSE	Cytochrome c oxidase subunit 7C, mitochondrial (Cytochrome c oxidase polypeptide VIIc)	Cox7c Cox7c1	63	1178.63	11.91	Medium	0.012	0.02739	170.4	0.1	4676.5	6.5	H-2 Db
Y3	MHC-DB	High	LAYYFTEL	8		1	1	P17710	HXK1_MOUSE	Hexokinase-1 (EC 2.7.1.1) (Hexokinase type I) (HK I) (Hexokinase, tumor isozyme)	Hk1	974	1019.51	15.16	High	0.004	0.02296	7338.5	1.9	4.5	0.01	H-2 Kb
B22	MHC-DB	Medium	RAEDNADTL	9		1	1	P17918	PCNA_MOUSE	Proliferating cell nuclear antigen (PCNA) (Cyclin)	Pcna	261	1004.46	13.01	Medium	0.012	0.1027	939.8	0.4	20936.5	29	H-2 Db
B22	MHC-DB	High	SMDSSHVSL	9		1	2	P17918	PCNA_MOUSE	Proliferating cell nuclear antigen (PCNA) (Cyclin)	Pcna	261	962.425	29.33	High	0	0.0008217	14293.5	4.5	1122.3	2	H-2 Kb
B22	MHC-DB	High	AMGVNLTSM	9	1xOxidation [M]	1	8	P17918	PCNA_MOUSE	Proliferating cell nuclear antigen (PCNA) (Cyclin)	Pcna	261	939.427	64.99	High	0	4.03e-07	19.9	0.015	1147.9	2	H-2 Db
B22	MHC-DB	High	AMGVNLTSM	9		1	4	P17918	PCNA_MOUSE	Proliferating cell nuclear antigen (PCNA) (Cyclin)	Pcna	261	923.433	58.1	High	0	5.17e-08	19.9	0.015	1147.9	2	H-2 Db
B22	MHC-DB	High	AMGVNLTSM	9	2xOxidation [M2; M9]	1	4	P17918	PCNA_MOUSE	Proliferating cell nuclear antigen (PCNA) (Cyclin)	Pcna	261	955.422	43.98	High	0	8.085e-05	19.9	0.015	1147.9	2	H-2 Db
Y3	MHC-DB	High	AMGVNLTSM	9		1	3	P17918	PCNA_MOUSE	Proliferating cell nuclear antigen (PCNA) (Cyclin)	Pcna	261	923.433	46.75	High	0	9.98e-16	19.9	0.015	1147.9	2	H-2 Db
Y3	MHC-DB	High	AMGVNLTSM	9	1xOxidation [M2]	1	1	P17918	PCNA_MOUSE	Proliferating cell nuclear antigen (PCNA) (Cyclin)	Pcna	261	939.427	23.04	High	0.006	0.02739	19.9	0.015	1147.9	2	H-2 Db
Y3	MHC-DB	High	AIVERAAQL	9		1	3	P17932	RL32P_MOUSE	Putative 60S ribosomal protein L32'	Rpl32-ps	135	970.568	45.74	High	0	9.98e-16	36225.6	22	287.3	0.7	H-2 Kb
B22	MHC-DB	Medium	MCLDQYSML	9	2xOxidation [M1; M8]	1	1	P18155	MTDC_MOUSE	Bifunctional methylenetetrahydrofolate dehydrogenase/cyclohydrolase, mitochondrial [Includes: NAD-dependent methylenetetrahydrofolate dehydrogenase (EC 1.5.1.15); Methenyltetrahydrofolate cyclohydrolase (EC 3.5.4.9)]	Mthfd2 Nmdmc	350	1135.45	11.22	Medium	0.024	0.1731	37220.9	24	616.1	1.3	H-2 Kb
Y3	MHC-DB	Medium	MRALVSVVSL	10		1	1	P18761	CAH6_MOUSE	Carbonic anhydrase 6 (EC 4.2.1.1) (Carbonate dehydratase VI) (Carbonic anhydrase VI) (CA-VI) (Salivary carbonic anhydrase) (Secreted carbonic anhydrase)	Ca6 Car6	317	1074.63	13.22	Medium	0.027	0.1211	5075.5	1.3	8628.8	11	H-2 Db
B22	MHC-DB	High	AMGTNDTVI	9		1	2	P19096	FAS_MOUSE	Fatty acid synthase (EC 2.3.1.85) [Includes: [Acyl-carrier-protein] S-acetyltransferase (EC 2.3.1.38); [Acyl-carrier-protein] S-malonyltransferase (EC 2.3.1.39); 3-oxoacyl-[acyl-carrier-protein] synthase (EC 2.3.1.41); 3-oxoacyl-[acyl-carrier-protein] reductase (EC 1.1.1.100); 3-hydroxyacyl-[acyl-carrier-protein] dehydratase (EC 4.2.1.59); Enoyl-[acyl-carrier-protein] reductase (EC 1.3.1.39); Ole…	Fasn	2504	921.435	24.09	High	0	6.402e-05	22	0.015	8575.3	11	H-2 Db
B22	MHC-DB	High	TALENLSTL	9		1	4	P19096	FAS_MOUSE	Fatty acid synthase (EC 2.3.1.85) [Includes: [Acyl-carrier-protein] S-acetyltransferase (EC 2.3.1.38); [Acyl-carrier-protein] S-malonyltransferase (EC 2.3.1.39); 3-oxoacyl-[acyl-carrier-protein] synthase (EC 2.3.1.41); 3-oxoacyl-[acyl-carrier-protein] reductase (EC 1.1.1.100); 3-hydroxyacyl-[acyl-carrier-protein] dehydratase (EC 4.2.1.59); Enoyl-[acyl-carrier-protein] reductase (EC 1.3.1.39); Ole…	Fasn	2504	961.52	54.55	High	0	5.428e-05	6.6	0.01	505.7	1.1	H-2 Db
Y3	MHC-DB	High	TALENLSTL	9		1	2	P19096	FAS_MOUSE	Fatty acid synthase (EC 2.3.1.85) [Includes: [Acyl-carrier-protein] S-acetyltransferase (EC 2.3.1.38); [Acyl-carrier-protein] S-malonyltransferase (EC 2.3.1.39); 3-oxoacyl-[acyl-carrier-protein] synthase (EC 2.3.1.41); 3-oxoacyl-[acyl-carrier-protein] reductase (EC 1.1.1.100); 3-hydroxyacyl-[acyl-carrier-protein] dehydratase (EC 4.2.1.59); Enoyl-[acyl-carrier-protein] reductase (EC 1.3.1.39); Ole…	Fasn	2504	961.52	23.87	High	0	9.98e-16	6.6	0.01	505.7	1.1	H-2 Db
B22	MHC-DB	High	SGLLNSQAL	9		1	2	P19096	FAS_MOUSE	Fatty acid synthase (EC 2.3.1.85) [Includes: [Acyl-carrier-protein] S-acetyltransferase (EC 2.3.1.38); [Acyl-carrier-protein] S-malonyltransferase (EC 2.3.1.39); 3-oxoacyl-[acyl-carrier-protein] synthase (EC 2.3.1.41); 3-oxoacyl-[acyl-carrier-protein] reductase (EC 1.1.1.100); 3-hydroxyacyl-[acyl-carrier-protein] dehydratase (EC 4.2.1.59); Enoyl-[acyl-carrier-protein] reductase (EC 1.3.1.39); Ole…	Fasn	2504	902.494	41.21	High	0	8.784e-06	36.7	0.025	647.5	1.3	H-2 Db
Y3	MHC-DB	High	TSVQFMKL	8		1	3	P19096	FAS_MOUSE	Fatty acid synthase (EC 2.3.1.85) [Includes: [Acyl-carrier-protein] S-acetyltransferase (EC 2.3.1.38); [Acyl-carrier-protein] S-malonyltransferase (EC 2.3.1.39); 3-oxoacyl-[acyl-carrier-protein] synthase (EC 2.3.1.41); 3-oxoacyl-[acyl-carrier-protein] reductase (EC 1.1.1.100); 3-hydroxyacyl-[acyl-carrier-protein] dehydratase (EC 4.2.1.59); Enoyl-[acyl-carrier-protein] reductase (EC 1.3.1.39); Ole…	Fasn	2504	953.513	43.95	High	0	9.98e-16	17777.5	5.5	8.7	0.025	H-2 Kb
B22	MHC-DB	Medium	NEDMLNQCTL	10	1xOxidation [M4]	1	1	P19228	CASA1_MOUSE	Alpha-S1-casein (Alpha-casein)	Csn1s1 Csn1 Csna	313	1196.49	12.32	Medium	0.028	0.1949	6716	1.7	31233.5	55	H-2 Db
B22	MHC-DB	High	AAKVNTDAM	9		1	2	P19246	NFH_MOUSE	Neurofilament heavy polypeptide (NF-H) (200 kDa neurofilament protein) (Neurofilament triplet H protein)	Nefh Kiaa0845 Nfh	1090	920.451	33.44	High	0	5.44e-06	21.5	0.015	11649.6	15	H-2 Db
Y3	MHC-DB	High	VGWKYQAV	8		1	2	P19253	RL13A_MOUSE	60S ribosomal protein L13a (Transplantation antigen P198) (Tum-P198 antigen)	Rpl13a P198 Tstap198-7	203	950.509	31.51	High	0.005	0.02739	34917.9	20	14.1	0.04	H-2 Kb
B22	MHC-DB	High	AANRNNDAL	9		1	2	P20152	VIME_MOUSE	Vimentin	Vim	466	958.47	28.97	High	0	0.002113	25.2	0.015	10964.9	14	H-2 Db
Y3	MHC-DB	High	VGYQFRTSL	9		1	3	P21271	MYO5B_MOUSE	Unconventional myosin-Vb	Myo5b Kiaa1119	1818	1070.56	56.55	High	0	9.98e-16	1298.9	0.5	4.5	0.01	H-2 Kb
B22	MHC-DB	High	STVRNADVIA	10		1	2	P21447	MDR1A_MOUSE	Multidrug resistance protein 1A (EC 3.6.3.44) (ATP-binding cassette sub-family B member 1A) (MDR1A) (Multidrug resistance protein 3) (P-glycoprotein 3)	Abcb1a Abcb4 Mdr1a Mdr3 Pgy-3 Pgy3	1276	1045.56	16.49	High	0.004	0.0442	334.9	0.175	26891	41	H-2 Db
Y3	MHC-DB	High	SILRFITI	8		1	2	P22366	MYD88_MOUSE	Myeloid differentiation primary response protein MyD88	Myd88	296	962.603	28.8	High	0	4.69e-10	13888.3	4	47.5	0.15	H-2 Kb
B22	MHC-DB	High	YSGLNQRAV	9		1	2	P22646	CD3E_MOUSE	T-cell surface glycoprotein CD3 epsilon chain (T-cell surface antigen T3/Leu-4 epsilon chain) (CD antigen CD3e)	Cd3e	189	1007.53	47.66	High	0	7.659e-06	426.6	0.2	5834.9	8	H-2 Db
Y3	MHC-DB	High	AASNWLYLAKL	11		1	1	P22724	WNT4_MOUSE	Protein Wnt-4	Wnt4 Wnt-4	351	1249.69	14.29	High	0.007	0.02739	19680.1	6.5	143.3	0.4	H-2 Kb
B22	MHC-DB	High	FALVNGNNI	9		1	3	P22892	AP1G1_MOUSE	AP-1 complex subunit gamma-1 (Adaptor protein complex AP-1 subunit gamma-1) (Adaptor-related protein complex 1 subunit gamma-1) (Clathrin assembly protein complex 1 gamma-1 large chain) (Gamma-adaptin) (Gamma1-adaptin) (Golgi adaptor HA1/AP1 adaptin subunit gamma-1)	Ap1g1 Adtg Clapg1	822	961.51	49.06	High	0	8.76e-07	4.2	0.01	3316.4	5	H-2 Db
Y3	MHC-DB	High	TSYRFTTEL	9		1	1	P22933	GBRD_MOUSE	Gamma-aminobutyric acid receptor subunit delta (GABA(A) receptor subunit delta)	Gabrd	449	1117.55	16.3	High	0	9.98e-16	1773.9	0.6	4.9	0.01	H-2 Kb
B22	MHC-DB	High	FAHFNADYR	9		1	2	P22933	GBRD_MOUSE	Gamma-aminobutyric acid receptor subunit delta (GABA(A) receptor subunit delta)	Gabrd	449	1140.52	20.74	High	0	0.00554	484.7	0.25	20800.2	29	H-2 Db
B22	MHC-DB	High	QSIEFSRL	8		1	2	P23116	EIF3A_MOUSE	Eukaryotic translation initiation factor 3 subunit A (eIF3a) (Centrosomin) (Eukaryotic translation initiation factor 3 subunit 10) (eIF-3-theta) (eIF3 p167) (eIF3 p180) (eIF3 p185) (p162)	Eif3a Csma Eif3 Eif3s10	1344	979.521	25.36	High	0	0.0006723	33685.5	18	5.5	0.015	H-2 Kb
Y3	MHC-DB	High	QSIEFSRL	8		1	3	P23116	EIF3A_MOUSE	Eukaryotic translation initiation factor 3 subunit A (eIF3a) (Centrosomin) (Eukaryotic translation initiation factor 3 subunit 10) (eIF-3-theta) (eIF3 p167) (eIF3 p180) (eIF3 p185) (p162)	Eif3a Csma Eif3 Eif3s10	1344	979.521	40.11	High	0	2.68e-13	33685.5	18	5.5	0.015	H-2 Kb
B22	MHC-DB	High	FGIDNFEFI	9		1	3	P23298	KPCL_MOUSE	Protein kinase C eta type (EC 2.7.11.13) (PKC-L) (nPKC-eta)	Prkch Pkch	683	1101.53	25.12	High	0.001	0.006652	16.8	0.01	3941	5.5	H-2 Db
B22	MHC-DB	High	KTPKNQEAL	9		1	2	P23359	BMP7_MOUSE	Bone morphogenetic protein 7 (BMP-7) (Osteogenic protein 1) (OP-1)	Bmp7 Bmp-7 Op1	430	1028.57	11.88	High	0.002	0.01759	494.4	0.25	6953.6	9	H-2 Db
B22	MHC-DB	High	VQPTHVIHL	9		1	1	P23591	FCL_MOUSE	GDP-L-fucose synthase (EC 1.1.1.271) (GDP-4-keto-6-deoxy-D-mannose-3,5-epimerase-4-reductase) (Protein FX) (Red cell NADP(H)-binding protein) (Transplantation antigen P35B) (Tum-P35B antigen)	Tsta3 P35b Tstap35b	321	1043.6	23.26	High	0	0.003767	4828.6	1.3	169.8	0.5	H-2 Kb
B22	MHC-DB	High	SAPNNITVL	9		1	1	P23780	BGAL_MOUSE	Beta-galactosidase (EC 3.2.1.23) (Acid beta-galactosidase) (Lactase)	Glb1 Bgl Glb-1	647	928.51	26.43	High	0	0.001283	4.5	0.01	2239.8	3.5	H-2 Db
B22	MHC-DB	High	NMTINSTVLT	10		1	1	P23780	BGAL_MOUSE	Beta-galactosidase (EC 3.2.1.23) (Acid beta-galactosidase) (Lactase)	Glb1 Bgl Glb-1	647	1093.56	19.26	High	0.003	0.03091	6093	1.6	22356.3	31	H-2 Db
Y3	MHC-DB	High	YAMIYRNL	8		1	2	P23804	MDM2_MOUSE	E3 ubiquitin-protein ligase Mdm2 (EC 6.3.2.-) (Double minute 2 protein) (Oncoprotein Mdm2) (p53-binding protein Mdm2)	Mdm2	489	1043.53	29.22	High	0	9.98e-16	17002.6	5.5	8.9	0.025	H-2 Kb
Y3	MHC-DB	High	YAMIYRNL	8	1xOxidation [M3]	1	2	P23804	MDM2_MOUSE	E3 ubiquitin-protein ligase Mdm2 (EC 6.3.2.-) (Double minute 2 protein) (Oncoprotein Mdm2) (p53-binding protein Mdm2)	Mdm2	489	1059.53	20.17	High	0	1.05e-07	17002.6	5.5	8.9	0.025	H-2 Kb
Y3	MHC-DB	Medium	INYVVAHV	8		1	1	P24063	ITAL_MOUSE	Integrin alpha-L (CD11 antigen-like family member A) (Leukocyte adhesion glycoprotein LFA-1 alpha chain) (LFA-1A) (Leukocyte function-associated molecule 1 alpha chain) (Lymphocyte antigen 15) (Ly-15) (CD antigen CD11a)	Itgal Lfa-1 Ly-15	1163	914.509	23.07	Medium	0.011	0.02739	32553.6	17	5.3	0.015	H-2 Kb
Y3	MHC-DB	High	KILDTFEKL	9		1	2	P24063	ITAL_MOUSE	Integrin alpha-L (CD11 antigen-like family member A) (Leukocyte adhesion glycoprotein LFA-1 alpha chain) (LFA-1A) (Leukocyte function-associated molecule 1 alpha chain) (Lymphocyte antigen 15) (Ly-15) (CD antigen CD11a)	Itgal Lfa-1 Ly-15	1163	1106.65	54.08	High	0	9.98e-16	31539.9	16	556.8	1.2	H-2 Kb
Y3	MHC-DB	High	ANYQRDGPM	9		1	4	P24270	CATA_MOUSE	Catalase (EC 1.11.1.6)	Cat Cas-1 Cas1	527	1051.46	57.46	High	0	9.98e-16	11433.2	3.5	214.7	0.6	H-2 Kb
Y3	MHC-DB	High	ANYQRDGPM	9	1xOxidation [M9]	1	1	P24270	CATA_MOUSE	Catalase (EC 1.11.1.6)	Cat Cas-1 Cas1	527	1067.46	32.93	High	0.003	0.000932	11433.2	3.5	214.7	0.6	H-2 Kb
Y3	MHC-DB	High	TWKEVYATL	9		1	1	P24529	TY3H_MOUSE	Tyrosine 3-monooxygenase (EC 1.14.16.2) (Tyrosine 3-hydroxylase) (TH)	Th	498	1110.58	24.39	High	0.003	0.0009622	41396.9	34	746.5	1.5	H-2 Kb
B22	MHC-DB	Medium	AMYDFQAT	8	1xOxidation [M2]	1	3	P24604	TEC_MOUSE	Tyrosine-protein kinase Tec (EC 2.7.10.2)	Tec	630	962.392	19.34	Medium	0.024	0.1671	31865.4	16	192.2	0.5	H-2 Kb
B22	MHC-DB	High	RSIQNAQFL	9		1	3	P24638	PPAL_MOUSE	Lysosomal acid phosphatase (LAP) (EC 3.1.3.2)	Acp2	423	1076.58	27.02	High	0	0.0009555	6.8	0.01	2150.9	3.5	H-2 Db
Y3	MHC-DB	High	VQMKFRLL	8		1	2	P24860	CCNB1_MOUSE	G2/mitotic-specific cyclin-B1	Ccnb1 Ccn-2 Ccnb1-rs13 Cycb Cycb1	430	1034.62	38.83	High	0	2.31e-11	20538.7	7	11.2	0.04	H-2 Kb
Y3	MHC-DB	High	VQMKFRLL	8	1xOxidation [M3]	1	2	P24860	CCNB1_MOUSE	G2/mitotic-specific cyclin-B1	Ccnb1 Ccn-2 Ccnb1-rs13 Cycb Cycb1	430	1050.61	23.81	High	0	9.98e-16	20538.7	7	11.2	0.04	H-2 Kb
B22	MHC-DB	High	NQYRLIVSV	9		1	2	P25206	MCM3_MOUSE	DNA replication licensing factor MCM3 (EC 3.6.4.12) (DNA polymerase alpha holoenzyme-associated protein P1) (P1-MCM3)	Mcm3 Mcmd Mcmd3	812	1091.62	35.68	High	0	0.0001414	7265.8	1.9	3862.5	5.5	H-2 Db
B22	MHC-DB	High	FSIKNKKGSEL	11		1	4	P26041	MOES_MOUSE	Moesin (Membrane-organizing extension spike protein)	Msn	577	1250.71	25.21	High	0	0.0001127	138.8	0.08	14437.1	19	H-2 Db
Y3	MHC-DB	High	KNFAFLEF	8		1	2	P26369	U2AF2_MOUSE	Splicing factor U2AF 65 kDa subunit (U2 auxiliary factor 65 kDa subunit) (U2 snRNP auxiliary factor large subunit)	U2af2 U2af65	475	1015.52	22.83	High	0	1.5e-14	30466.5	14	247.3	0.6	H-2 Kb
B22	MHC-DB	High	FAPPDVAPPL	10		1	1	P26450	P85A_MOUSE	Phosphatidylinositol 3-kinase regulatory subunit alpha (PI3-kinase regulatory subunit alpha) (PI3K regulatory subunit alpha) (PtdIns-3-kinase regulatory subunit alpha) (Phosphatidylinositol 3-kinase 85 kDa regulatory subunit alpha) (PI3-kinase subunit p85-alpha) (PtdIns-3-kinase regulatory subunit p85-alpha)	Pik3r1	724	1023.55	12.29	High	0	0.003324	1040	0.4	17067.7	23	H-2 Db
B22	MHC-DB	High	SSLPCDIHLV	10		1	2	P27046	MA2A1_MOUSE	Alpha-mannosidase 2 (EC 3.2.1.114) (Golgi alpha-mannosidase II) (AMan II) (Man II) (Mannosidase alpha class 2A member 1) (Mannosyl-oligosaccharide 1,3-1,6-alpha-mannosidase)	Man2a1 Mana2	1150	1083.55	13.55	High	0.003	0.03241	5354.5	1.4	7843.8	10	H-2 Db
Y3	MHC-DB	High	SSPHYTTL	8		1	3	P27046	MA2A1_MOUSE	Alpha-mannosidase 2 (EC 3.2.1.114) (Golgi alpha-mannosidase II) (AMan II) (Man II) (Mannosidase alpha class 2A member 1) (Mannosyl-oligosaccharide 1,3-1,6-alpha-mannosidase)	Man2a1 Mana2	1150	905.436	21.02	High	0	3.61e-15	5172.1	1.4	12.2	0.04	H-2 Kb
B22	MHC-DB	High	SGPTNASAF	9		1	1	P27546	MAP4_MOUSE	Microtubule-associated protein 4 (MAP-4)	Map4 Mtap4	1125	851.389	20.55	High	0.006	0.05585	120.6	0.08	6581.5	8.5	H-2 Db
B22	MHC-DB	High	ASLQLISHI	9		1	3	P27641	XRCC5_MOUSE	X-ray repair cross-complementing protein 5 (EC 3.6.4.-) (ATP-dependent DNA helicase 2 subunit 2) (ATP-dependent DNA helicase II 80 kDa subunit) (CTC box-binding factor 85 kDa subunit) (CTC85) (CTCBF) (DNA repair protein XRCC5) (Ku autoantigen protein p86 homolog) (Ku80) (Nuclear factor IV)	Xrcc5 G22p2	732	981.573	36.97	High	0	5.779e-06	492.6	0.25	1019.5	1.8	H-2 Db
Y3	MHC-DB	High	RQYMFSSL	8	1xOxidation [M4]	1	2	P27641	XRCC5_MOUSE	X-ray repair cross-complementing protein 5 (EC 3.6.4.-) (ATP-dependent DNA helicase 2 subunit 2) (ATP-dependent DNA helicase II 80 kDa subunit) (CTC box-binding factor 85 kDa subunit) (CTC85) (CTCBF) (DNA repair protein XRCC5) (Ku autoantigen protein p86 homolog) (Ku80) (Nuclear factor IV)	Xrcc5 G22p2	732	1047.49	33.98	High	0	9.98e-16	11666.2	3.5	4	0.01	H-2 Kb
Y3	MHC-DB	High	RQYMFSSL	8		1	4	P27641	XRCC5_MOUSE	X-ray repair cross-complementing protein 5 (EC 3.6.4.-) (ATP-dependent DNA helicase 2 subunit 2) (ATP-dependent DNA helicase II 80 kDa subunit) (CTC box-binding factor 85 kDa subunit) (CTC85) (CTCBF) (DNA repair protein XRCC5) (Ku autoantigen protein p86 homolog) (Ku80) (Nuclear factor IV)	Xrcc5 G22p2	732	1031.5	30.58	High	0.005	0.02341	11666.2	3.5	4	0.01	H-2 Kb
B22	MHC-DB	High	FAHTNIESL	9		1	4	P27773	PDIA3_MOUSE	Protein disulfide-isomerase A3 (EC 5.3.4.1) (58 kDa glucose-regulated protein) (58 kDa microsomal protein) (p58) (Disulfide isomerase ER-60) (Endoplasmic reticulum resident protein 57) (ER protein 57) (ERp57) (Endoplasmic reticulum resident protein 60) (ER protein 60) (ERp60)	Pdia3 Erp Erp60 Grp58	505	1031.52	40.99	High	0	1.72e-05	5.9	0.01	2465	4	H-2 Db
Y3	MHC-DB	High	FAHTNIESL	9		1	3	P27773	PDIA3_MOUSE	Protein disulfide-isomerase A3 (EC 5.3.4.1) (58 kDa glucose-regulated protein) (58 kDa microsomal protein) (p58) (Disulfide isomerase ER-60) (Endoplasmic reticulum resident protein 57) (ER protein 57) (ERp57) (Endoplasmic reticulum resident protein 60) (ER protein 60) (ERp60)	Pdia3 Erp Erp60 Grp58	505	1031.52	41.16	High	0	1.59e-13	5.9	0.01	2465	4	H-2 Db
B22	MHC-DB	Medium	QWYKGAILL	9		1	1	P27931	IL1R2_MOUSE	Interleukin-1 receptor type 2 (IL-1R-2) (IL-1RT-2) (IL-1RT2) (CD121 antigen-like family member B) (IL-1 type II receptor) (Interleukin-1 receptor beta) (IL-1R-beta) (Interleukin-1 receptor type II) (CD antigen CD121b) [Cleaved into: Interleukin-1 receptor type 2, membrane form (mIL-1R2) (mIL-1RII); Interleukin-1 receptor type 2, soluble form (sIL-1R2) (sIL-1RII)]	Il1r2 Il-1r2 Il1rb	410	1091.62	29.92	Medium	0.017	0.1291	36942	23	665.3	1.3	H-2 Kb
B22	MHC-DB	High	GGVVNMYHM	9		1	4	P28063	PSB8_MOUSE	Proteasome subunit beta type-8 (EC 3.4.25.1) (Low molecular mass protein 7) (Macropain subunit C13) (Multicatalytic endopeptidase complex subunit C13) (Proteasome component C13) (Proteasome subunit beta-5i)	Psmb8 Lmp7 Mc13	276	1007.44	50.29	High	0	4.678e-06	17.5	0.01	8407.7	11	H-2 Db
B22	MHC-DB	High	GGVVNMYHM	9	1xOxidation [M]	1	9	P28063	PSB8_MOUSE	Proteasome subunit beta type-8 (EC 3.4.25.1) (Low molecular mass protein 7) (Macropain subunit C13) (Multicatalytic endopeptidase complex subunit C13) (Proteasome component C13) (Proteasome subunit beta-5i)	Psmb8 Lmp7 Mc13	276	1023.44	43.24	High	0	1.238e-05	17.5	0.01	8407.7	11	H-2 Db
B22	MHC-DB	High	GGVVNMYHM	9	2xOxidation [M6; M9]	1	5	P28063	PSB8_MOUSE	Proteasome subunit beta type-8 (EC 3.4.25.1) (Low molecular mass protein 7) (Macropain subunit C13) (Multicatalytic endopeptidase complex subunit C13) (Proteasome component C13) (Proteasome subunit beta-5i)	Psmb8 Lmp7 Mc13	276	1039.43	42.02	High	0	2.125e-05	17.5	0.01	8407.7	11	H-2 Db
Y3	MHC-DB	High	GGVVNMYHM	9		1	2	P28063	PSB8_MOUSE	Proteasome subunit beta type-8 (EC 3.4.25.1) (Low molecular mass protein 7) (Macropain subunit C13) (Multicatalytic endopeptidase complex subunit C13) (Proteasome component C13) (Proteasome subunit beta-5i)	Psmb8 Lmp7 Mc13	276	1007.44	33.85	High	0	9.98e-16	17.5	0.01	8407.7	11	H-2 Db
B22	MHC-DB	High	NSIRNLDTI	9		1	8	P28658	ATX10_MOUSE	Ataxin-10 (Brain protein E46) (Spinocerebellar ataxia type 10 protein homolog)	Atxn10 Sca10	475	1045.56	50.98	High	0	0.0006879	3.6	0.01	10006.1	13	H-2 Db
Y3	MHC-DB	High	NSIRNLDTI	9		1	4	P28658	ATX10_MOUSE	Ataxin-10 (Brain protein E46) (Spinocerebellar ataxia type 10 protein homolog)	Atxn10 Sca10	475	1045.56	49.36	High	0	6.89e-10	3.6	0.01	10006.1	13	H-2 Db
B22	MHC-DB	High	VTIRLLDVL	9		1	3	P28658	ATX10_MOUSE	Ataxin-10 (Brain protein E46) (Spinocerebellar ataxia type 10 protein homolog)	Atxn10 Sca10	475	1041.67	35.29	High	0	8.417e-05	662.1	0.3	871.7	1.6	H-2 Db
Y3	MHC-DB	High	LVLLFREL	8		1	2	P28658	ATX10_MOUSE	Ataxin-10 (Brain protein E46) (Spinocerebellar ataxia type 10 protein homolog)	Atxn10 Sca10	475	1002.63	31.89	High	0	2.49e-08	25553.2	10	30.8	0.09	H-2 Kb
Y3	MHC-DB	High	VVYAVRNL	8		1	2	P28658	ATX10_MOUSE	Ataxin-10 (Brain protein E46) (Spinocerebellar ataxia type 10 protein homolog)	Atxn10 Sca10	475	933.552	24.28	High	0.003	0.007991	34213	19	5.5	0.015	H-2 Kb
Y3	MHC-DB	High	VFIDKQTNL	9		1	2	P28659	CELF1_MOUSE	CUGBP Elav-like family member 1 (CELF-1) (50 kDa nuclear polyadenylated RNA-binding protein) (Brain protein F41) (Bruno-like protein 2) (CUG triplet repeat RNA-binding protein 1) (CUG-BP1) (CUG-BP- and ETR-3-like factor 1) (Deadenylation factor CUG-BP) (Deadenylation factor EDEN-BP) (Embryo deadenylation element-binding protein homolog) (EDEN-BP homolog) (RNA-binding protein BRUNOL-2)	Celf1 Brunol2 Cugbp Cugbp1	486	1077.59	28.24	High	0	9.98e-16	36537	22	267.2	0.7	H-2 Kb
Y3	MHC-DB	High	SSLHPMGGL	9		1	1	P28659	CELF1_MOUSE	CUGBP Elav-like family member 1 (CELF-1) (50 kDa nuclear polyadenylated RNA-binding protein) (Brain protein F41) (Bruno-like protein 2) (CUG triplet repeat RNA-binding protein 1) (CUG-BP1) (CUG-BP- and ETR-3-like factor 1) (Deadenylation factor CUG-BP) (Deadenylation factor EDEN-BP) (Embryo deadenylation element-binding protein homolog) (EDEN-BP homolog) (RNA-binding protein BRUNOL-2)	Celf1 Brunol2 Cugbp Cugbp1	486	898.445	36.89	High	0	4.367e-06	25227.2	10	369	0.9	H-2 Kb
Y3	MHC-DB	High	VILSFRSL	8		1	3	P28660	NCKP1_MOUSE	Nck-associated protein 1 (NAP 1) (Brain protein H19) (MH19) (Membrane-associated protein HEM-2) (p125Nap1)	Nckap1 Hem2 Kiaa0587 Nap1	1128	934.572	33.91	High	0	9.98e-16	26201.7	11	4	0.01	H-2 Kb
Y3	MHC-DB	High	EVFDFRGM	8		1	3	P28660	NCKP1_MOUSE	Nck-associated protein 1 (NAP 1) (Brain protein H19) (MH19) (Membrane-associated protein HEM-2) (p125Nap1)	Nckap1 Hem2 Kiaa0587 Nap1	1128	1000.46	19.49	High	0.002	0.000932	44097.1	45	591.2	1.2	H-2 Kb
B22	MHC-DB	Medium	LSPSWIYNL	9		1	1	P28666	MUG2_MOUSE	Murinoglobulin-2 (MuG2)	Mug2 Mug-2	1451	1092.57	10.94	Medium	0.013	0.1115	11223	3	68	0.2	H-2 Kb
Y3	MHC-DB	High	KTFTFDTV	8		1	1	P28741	KIF3A_MOUSE	Kinesin-like protein KIF3A (Microtubule plus end-directed kinesin motor 3A)	Kif3a Kif3	701	958.488	18.86	High	0.004	0.02296	20346.5	7	90.2	0.25	H-2 Kb
B22	MHC-DB	High	VSPTGTHTL	9		1	3	P28798	GRN_MOUSE	Granulins (PC cell-derived growth factor) (PCDGF) (Proepithelin) (PEPI) [Cleaved into: Acrogranin (Progranulin); Granulin-1; Granulin-2; Granulin-3; Granulin-4; Granulin-5; Granulin-6; Granulin-7]	Grn	589	912.479	28.63	High	0	0.0002392	507.9	0.25	3262.1	5	H-2 Db
B22	MHC-DB	High	AGVRNPQQHL	10		1	13	P29341	PABP1_MOUSE	Polyadenylate-binding protein 1 (PABP-1) (Poly(A)-binding protein 1)	Pabpc1 Pabp1	636	1119.6	30.96	High	0	0.0005372	1499.5	0.5	16639	22	H-2 Db
Y3	MHC-DB	High	AGVRNPQQHL	10		1	9	P29341	PABP1_MOUSE	Polyadenylate-binding protein 1 (PABP-1) (Poly(A)-binding protein 1)	Pabpc1 Pabp1	636	1119.6	43.39	High	0	9.98e-16	1499.5	0.5	16639	22	H-2 Db
B22	MHC-DB	High	VANTSTQTM	9		1	1	P29341	PABP1_MOUSE	Polyadenylate-binding protein 1 (PABP-1) (Poly(A)-binding protein 1)	Pabpc1 Pabp1	636	952.44	16.36	High	0.001	0.008799	563.1	0.25	4231.4	6	H-2 Db
Y3	MHC-DB	High	AQYKFIYV	8		1	4	P29351	PTN6_MOUSE	Tyrosine-protein phosphatase non-receptor type 6 (EC 3.1.3.48) (70Z-SHP) (Hematopoietic cell protein-tyrosine phosphatase) (PTPTY-42) (Protein-tyrosine phosphatase 1C) (PTP-1C) (SH-PTP1) (SHP-1)	Ptpn6 Hcp Hcph Ptp1C	595	1031.56	36.56	High	0	6.73e-07	8783.8	2.5	18.9	0.06	H-2 Kb
B22	MHC-DB	High	VQPKNSSSFL	10		1	1	P29352	PTN22_MOUSE	Tyrosine-protein phosphatase non-receptor type 22 (EC 3.1.3.48) (Hematopoietic cell protein-tyrosine phosphatase 70Z-PEP) (PEST-domain phosphatase) (PEP)	Ptpn22 Ptpn8	802	1106.58	11.93	High	0	0.0005627	469.5	0.2	10900	14	H-2 Db
B22	MHC-DB	High	SKSLQSLNMTL	11	1xOxidation [M9]	1	1	P30204	MSRE_MOUSE	Macrophage scavenger receptor types I and II (Macrophage acetylated LDL receptor I and II) (Scavenger receptor type A) (SR-A) (CD antigen CD204)	Msr1 Scvr	458	1237.65	20.72	High	0.001	0.005834	6372.2	1.7	13531	17	H-2 Db
B22	MHC-DB	High	SQIREMETLI	10	1xOxidation [M6]	1	3	P30276	CCNB2_MOUSE	G2/mitotic-specific cyclin-B2	Ccnb2 Cycb2	398	1235.63	12.89	High	0.001	0.01032	2385.4	0.7	12960.8	17	H-2 Db
B22	MHC-DB	High	AAVIAHDFL	9		1	3	P30282	CCND3_MOUSE	G1/S-specific cyclin-D3	Ccnd3 Cyl-3	292	956.52	46.25	High	0	0.0002729	313.6	0.15	4226.1	6	H-2 Db
B22	MHC-DB	High	YARIYMVL	8		1	3	P30728	DRD3_MOUSE	D(3) dopamine receptor (Dopamine D3 receptor)	Drd3	446	1028.56	20.96	High	0.001	0.008556	24510.9	9.5	189.7	0.5	H-2 Kb
B22	MHC-DB	Medium	ALQSNGHPL	9		1	1	P31360	PO3F2_MOUSE	POU domain, class 3, transcription factor 2 (Brain-specific homeobox/POU domain protein 2) (Brain-2) (Brn-2) (Nervous system-specific octamer-binding transcription factor N-Oct-3) (Octamer-binding protein 7) (Oct-7) (Octamer-binding transcription factor 7) (OTF-7)	Pou3f2 Brn-2 Brn2 Otf7	445	936.49	12.3	Medium	0.021	0.1557	726.6	0.3	9780.2	13	H-2 Db
Y3	MHC-DB	High	SIYKLRTL	8		1	1	P31649	S6A13_MOUSE	Sodium- and chloride-dependent GABA transporter 2 (GAT-2) (Sodium- and chloride-dependent GABA transporter 3) (GAT-3) (Solute carrier family 6 member 13)	Slc6a13 Gabt2 Gabt3 Gat-3 Gat2 Gat3	602	993.609	20.44	High	0.002	0.000932	17781.7	5.5	13.4	0.04	H-2 Kb
Y3	MHC-DB	High	KNVVYRDL	8		1	2	P31750	AKT1_MOUSE	RAC-alpha serine/threonine-protein kinase (EC 2.7.11.1) (AKT1 kinase) (Protein kinase B) (PKB) (Protein kinase B alpha) (PKB alpha) (Proto-oncogene c-Akt) (RAC-PK-alpha) (Thymoma viral proto-oncogene)	Akt1 Akt Rac	480	1006.57	23.1	High	0	4.059e-05	39105.9	28	172.5	0.5	H-2 Kb
B22	MHC-DB	High	SAETNLEAL	9		1	2	P31938	MP2K1_MOUSE	Dual specificity mitogen-activated protein kinase kinase 1 (MAP kinase kinase 1) (MAPKK 1) (EC 2.7.12.2) (ERK activator kinase 1) (MAPK/ERK kinase 1) (MEK 1)	Map2k1 Mek1 Prkmk1	393	947.468	27.46	High	0	0.000903	57.6	0.04	5737	7.5	H-2 Db
B22	MHC-DB	High	AGVVNTIFT	9		1	2	P32037	GTR3_MOUSE	Solute carrier family 2, facilitated glucose transporter member 3 (Glucose transporter type 3, brain) (GLUT-3)	Slc2a3 Glut-3 Glut3	493	921.504	34.83	High	0	0.00122	404.2	0.2	24559.8	36	H-2 Db
Y3	MHC-DB	High	VNTIFTVV	8		1	3	P32037	GTR3_MOUSE	Solute carrier family 2, facilitated glucose transporter member 3 (Glucose transporter type 3, brain) (GLUT-3)	Slc2a3 Glut-3 Glut3	493	892.514	41.85	High	0	5.47e-07	35553.5	21	311.6	0.8	H-2 Kb
Y3	MHC-DB	High	AAYEFTTL	8		1	3	P32233	DRG1_MOUSE	Developmentally-regulated GTP-binding protein 1 (DRG-1) (Neural precursor cell expressed developmentally down-regulated protein 3) (NEDD-3)	Drg1 Drg Nedd-3 Nedd3	367	915.446	37.56	High	0	1.48e-08	4121.9	1.1	3.3	0.01	H-2 Kb
B22	MHC-DB	High	YTVENAKDII	10		1	3	P32921	SYWC_MOUSE	Tryptophan--tRNA ligase, cytoplasmic (EC 6.1.1.2) (Tryptophanyl-tRNA synthetase) (TrpRS) [Cleaved into: T1-TrpRS; T2-TrpRS]	Wars Wrs	481	1165.61	34.78	High	0	0.0002211	105.5	0.07	29751.2	48	H-2 Db
Y3	MHC-DB	High	QSPGFYRNV	9		1	2	P32921	SYWC_MOUSE	Tryptophan--tRNA ligase, cytoplasmic (EC 6.1.1.2) (Tryptophanyl-tRNA synthetase) (TrpRS) [Cleaved into: T1-TrpRS; T2-TrpRS]	Wars Wrs	481	1067.53	26.69	High	0.003	0.000932	40009.4	30	10.7	0.03	H-2 Kb
B22	MHC-DB	High	TMFFAMVLL	9	2xOxidation [M2; M6]	1	1	P33033	MC3R_MOUSE	Melanocortin receptor 3 (MC3-R)	Mc3r	323	1104.55	14.99	High	0.002	0.01731	6245.5	1.6	130.9	0.4	H-2 Kb
B22	MHC-DB	High	YLLYLLEHI	9		1	1	P33609	DPOLA_MOUSE	DNA polymerase alpha catalytic subunit (EC 2.7.7.7) (DNA polymerase alpha catalytic subunit p180)	Pola1 Pola	1465	1176.67	12.17	High	0	6.546e-05	2164.3	0.7	6090.2	8	H-2 Db
Y3	MHC-DB	High	QVFQFYWL	8		1	1	P33609	DPOLA_MOUSE	DNA polymerase alpha catalytic subunit (EC 2.7.7.7) (DNA polymerase alpha catalytic subunit p180)	Pola1 Pola	1465	1130.57	17.9	High	0.003	0.000932	7570.9	2	48.4	0.15	H-2 Kb
B22	MHC-DB	High	KQPLNTTRI	9		1	2	P35235	PTN11_MOUSE	Tyrosine-protein phosphatase non-receptor type 11 (EC 3.1.3.48) (Protein-tyrosine phosphatase SYP) (SH-PTP2) (SHP-2) (Shp2)	Ptpn11	597	1070.63	19.97	High	0.005	0.05091	93.1	0.06	6947.4	9	H-2 Db
Y3	MHC-DB	High	AQYRFIYM	8	1xOxidation [M8]	1	2	P35235	PTN11_MOUSE	Tyrosine-protein phosphatase non-receptor type 11 (EC 3.1.3.48) (Protein-tyrosine phosphatase SYP) (SH-PTP2) (SHP-2) (Shp2)	Ptpn11	597	1107.53	31.67	High	0	9.98e-16	2358.2	0.7	8.7	0.025	H-2 Kb
Y3	MHC-DB	High	AQYRFIYM	8		1	2	P35235	PTN11_MOUSE	Tyrosine-protein phosphatase non-receptor type 11 (EC 3.1.3.48) (Protein-tyrosine phosphatase SYP) (SH-PTP2) (SHP-2) (Shp2)	Ptpn11	597	1091.53	19.35	High	0.005	0.02739	2358.2	0.7	8.7	0.025	H-2 Kb
B22	MHC-DB	High	AMNVNEIFM	9	1xOxidation [M]	1	10	P35278	RAB5C_MOUSE	Ras-related protein Rab-5C	Rab5c	216	1084.48	50.84	High	0	8.8e-08	16.1	0.01	4032.2	5.5	H-2 Db
B22	MHC-DB	High	AMNVNEIFM	9		1	2	P35278	RAB5C_MOUSE	Ras-related protein Rab-5C	Rab5c	216	1068.49	35.86	High	0	0.0007595	16.1	0.01	4032.2	5.5	H-2 Db
B22	MHC-DB	High	AMNVNEIFM	9	2xOxidation [M2; M9]	1	2	P35278	RAB5C_MOUSE	Ras-related protein Rab-5C	Rab5c	216	1100.48	24.33	High	0	0.004305	16.1	0.01	4032.2	5.5	H-2 Db
Y3	MHC-DB	High	EAVALNQEPPI	11		1	1	P35292	RAB17_MOUSE	Ras-related protein Rab-17	Rab17	214	1180.62	15.91	High	0.003	0.009449	5178.4	1.4	10095.6	13	H-2 Db
Y3	MHC-DB	High	IGVDFTVRSL	10		1	3	P35294	RAB19_MOUSE	Ras-related protein Rab-19	Rab19	217	1106.62	66.66	High	0	9.98e-16	30469.5	14	997.5	1.8	H-2 Kb
B22	MHC-DB	High	ASIVNKDGL	9		1	3	P35396	PPARD_MOUSE	Peroxisome proliferator-activated receptor delta (PPAR-delta) (Nuclear hormone receptor 1) (NUC1) (Nuclear receptor subfamily 1 group C member 2) (Peroxisome proliferator-activated receptor beta) (PPAR-beta)	Ppard Nr1c2 Pparb	440	916.51	47.62	High	0	5.036e-05	57.2	0.04	2531.3	4	H-2 Db
Y3	MHC-DB	High	SQYLFPKL	8		1	4	P35396	PPARD_MOUSE	Peroxisome proliferator-activated receptor delta (PPAR-delta) (Nuclear hormone receptor 1) (NUC1) (Nuclear receptor subfamily 1 group C member 2) (Peroxisome proliferator-activated receptor beta) (PPAR-beta)	Ppard Nr1c2 Pparb	440	995.556	36.8	High	0.003	0.003654	9738.5	3	4.5	0.01	H-2 Kb
B22	MHC-DB	Medium	QVFEAYNM	8		1	1	P35487	ODPAT_MOUSE	Pyruvate dehydrogenase E1 component subunit alpha, testis-specific form, mitochondrial (EC 1.2.4.1) (PDHE1-A type II)	Pdha2 Pdha-2 Pdhal	391	1001.44	12.07	Medium	0.033	0.2097	34474.2	19	415.8	0.9	H-2 Kb
B22	MHC-DB	High	IAPEDQVVL	9		1	2	P35545	UBIM_MOUSE	Ubiquitin-like protein FUBI (Monoclonal non-specific suppressor factor beta) (MNSF-beta)	Fau	74	983.541	33.43	High	0	0.00116	910.2	0.4	8445.5	11	H-2 Db
Y3	MHC-DB	High	NAIKYVNL	8		1	1	P35761	TTK_MOUSE	Dual specificity protein kinase TTK (EC 2.7.12.1) (ESK) (PYT)	Ttk Esk	856	934.536	20.74	High	0.004	0.02296	25918.3	11	49.3	0.15	H-2 Kb
B22	MHC-DB	High	IQWPNGITL	9		1	3	P35951	LDLR_MOUSE	Low-density lipoprotein receptor (LDL receptor)	Ldlr	862	1041.57	31.44	High	0	0.004279	264.8	0.125	1732.9	3	H-2 Db
Y3	MHC-DB	High	KILTFDQL	8		1	3	P35980	RL18_MOUSE	60S ribosomal protein L18	Rpl18	188	977.567	41.33	High	0	6.43e-07	24159.4	9	66.5	0.2	H-2 Kb
B22	MHC-DB	High	YMANGCLLNYL	11		1	1	P35991	BTK_MOUSE	Tyrosine-protein kinase BTK (EC 2.7.10.2) (Agammaglobulinemia tyrosine kinase) (ATK) (B-cell progenitor kinase) (BPK) (Bruton tyrosine kinase) (Kinase EMB)	Btk Bpk	659	1274.59	15.35	High	0.001	0.006158	2498.8	0.7	11698.2	15	H-2 Db
B22	MHC-DB	High	HTVQNADQV	9		1	3	P36371	TAP2_MOUSE	Antigen peptide transporter 2 (APT2) (ATP-binding cassette sub-family B member 3) (Histocompatibility antigen modifier 2)	Tap2 Abcb3 Ham-2 Ham2	702	1011.49	41.74	High	0	0.002125	248	0.125	22374.7	31	H-2 Db
Y3	MHC-DB	High	HTVQNADQV	9		1	2	P36371	TAP2_MOUSE	Antigen peptide transporter 2 (APT2) (ATP-binding cassette sub-family B member 3) (Histocompatibility antigen modifier 2)	Tap2 Abcb3 Ham-2 Ham2	702	1011.49	21.28	High	0.003	0.003654	248	0.125	22374.7	31	H-2 Db
Y3	MHC-DB	High	VSPRLTFL	8		1	3	P36371	TAP2_MOUSE	Antigen peptide transporter 2 (APT2) (ATP-binding cassette sub-family B member 3) (Histocompatibility antigen modifier 2)	Tap2 Abcb3 Ham-2 Ham2	702	932.556	28.62	High	0.003	0.003654	5322	1.4	30	0.09	H-2 Kb
B22	MHC-DB	High	GKVELLDYL	9		1	2	P38533	HSF2_MOUSE	Heat shock factor protein 2 (HSF 2) (Heat shock transcription factor 2) (HSTF 2)	Hsf2	535	1049.59	24.93	High	0	0.002144	4731.3	1.3	21264.4	29	H-2 Db
Y3	MHC-DB	High	KIVQFIVTL	9		1	4	P38533	HSF2_MOUSE	Heat shock factor protein 2 (HSF 2) (Heat shock transcription factor 2) (HSTF 2)	Hsf2	535	1060.68	37.93	High	0	6.918e-06	5194	1.4	367.1	0.9	H-2 Kb
B22	MHC-DB	Medium	FFEEFNQYL	9		1	1	P38585	TTL_MOUSE	Tubulin--tyrosine ligase (TTL) (EC 6.3.2.25)	Ttl	377	1236.56	15.68	Medium	0.028	0.193	21958.3	8	4179.4	6	H-2 Kb
Y3	MHC-DB	High	SGPKHLNM	8		1	1	P38647	GRP75_MOUSE	Stress-70 protein, mitochondrial (75 kDa glucose-regulated protein) (GRP-75) (Heat shock 70 kDa protein 9) (Mortalin) (Peptide-binding protein 74) (PBP74) (p66 MOT)	Hspa9 Grp75 Hsp74 Hspa9a	679	883.445	14.52	High	0.003	0.000941	26591.8	11	704.8	1.4	H-2 Kb
B22	MHC-DB	High	YAIKNIHGV	9		1	1	P39054	DYN2_MOUSE	Dynamin-2 (EC 3.6.5.5) (Dynamin UDNM)	Dnm2 Dyn2	870	1014.57	32.09	High	0	0.0002401	38.9	0.025	4255.6	6	H-2 Db
Y3	MHC-DB	High	RSYDFEFM	8	1xOxidation [M8]	1	4	P40336	VP26A_MOUSE	Vacuolar protein sorting-associated protein 26A (H<beta>58 protein) (H beta 58) (Vesicle protein sorting 26A) (mVPS26)	Vps26a Vps26	327	1110.46	22.98	High	0	9.98e-16	3828.1	1	21.5	0.07	H-2 Kb
Y3	MHC-DB	High	RSYDFEFM	8		1	3	P40336	VP26A_MOUSE	Vacuolar protein sorting-associated protein 26A (H<beta>58 protein) (H beta 58) (Vesicle protein sorting 26A) (mVPS26)	Vps26a Vps26	327	1094.46	20.12	High	0.002	0.000932	3828.1	1	21.5	0.07	H-2 Kb
Y3	MHC-DB	High	NSFRYNGL	8		1	2	P41105	RL28_MOUSE	60S ribosomal protein L28	Rpl28	137	970.474	33.53	High	0.003	0.003654	34958.8	20	9.3	0.025	H-2 Kb
Y3	MHC-DB	High	SSYRFVQNV	9		1	1	P42128	FOXK1_MOUSE	Forkhead box protein K1 (Myocyte nuclear factor) (MNF)	Foxk1 Mnf	719	1099.55	27.35	High	0	2.02e-07	6189	1.6	3.1	0.01	H-2 Kb
Y3	MHC-DB	High	IVELFRNL	8		1	2	P42227	STAT3_MOUSE	Signal transducer and activator of transcription 3 (Acute-phase response factor)	Stat3 Aprf	770	1003.59	40.32	High	0	9.98e-16	34004.5	19	17.8	0.05	H-2 Kb
B22	MHC-DB	High	ATLVFHNL	8		1	2	P42227	STAT3_MOUSE	Signal transducer and activator of transcription 3 (Acute-phase response factor)	Stat3 Aprf	770	914.509	41.18	High	0	6.899e-05	20044.6	7	6.9	0.02	H-2 Kb
Y3	MHC-DB	High	ATLVFHNL	8		1	5	P42227	STAT3_MOUSE	Signal transducer and activator of transcription 3 (Acute-phase response factor)	Stat3 Aprf	770	914.509	41.04	High	0	2.41e-09	20044.6	7	6.9	0.02	H-2 Kb
Y3	MHC-DB	High	RIVELFRNL	9		1	9	P42227	STAT3_MOUSE	Signal transducer and activator of transcription 3 (Acute-phase response factor)	Stat3 Aprf	770	1159.69	32.79	High	0	4.085e-06	26151.2	11	60.4	0.175	H-2 Kb
B22	MHC-DB	Medium	VSLSSLSL	8		1	1	P42567	EPS15_MOUSE	Epidermal growth factor receptor substrate 15 (Protein Eps15) (Protein AF-1p)	Eps15	897	805.467	11.94	Medium	0.049	0.286	16348.5	5	116.4	0.4	H-2 Kb
Y3	MHC-DB	High	VSLSSLSL	8		1	1	P42567	EPS15_MOUSE	Epidermal growth factor receptor substrate 15 (Protein Eps15) (Protein AF-1p)	Eps15	897	805.467	10.11	High	0.005	0.02296	16348.5	5	116.4	0.4	H-2 Kb
Y3	MHC-DB	High	SIIVFNLV	8		1	3	P42867	GPT_MOUSE	UDP-N-acetylglucosamine--dolichyl-phosphate N-acetylglucosaminephosphotransferase (EC 2.7.8.15) (GlcNAc-1-P transferase) (G1PT) (GPT) (N-acetylglucosamine-1-phosphate transferase)	Dpagt1 Dpagt2 Gnpta	410	904.55	24.54	High	0.002	0.000932	30076.8	14	25.9	0.08	H-2 Kb
Y3	MHC-DB	High	KAPGFAQM	8		1	1	P42932	TCPQ_MOUSE	T-complex protein 1 subunit theta (TCP-1-theta) (CCT-theta)	Cct8 Cctq	548	849.429	27.17	High	0.003	0.0009979	22798.4	8.5	96.7	0.3	H-2 Kb
Y3	MHC-DB	Medium	ARNAYFIL	8		1	1	P43137	LIT1_MOUSE	Lithostathine-1 (Islet of Langerhans regenerating protein 1) (REG 1) (Pancreatic stone protein 1) (PSP) (Pancreatic thread protein 1) (PTP) (Regenerating protein 1)	Reg1	165	967.536	15.18	Medium	0.022	0.09212	42077.9	36	6241.5	8.5	H-2 Kb
Y3	MHC-DB	High	AIVSFAHV	8		1	1	P43247	MSH2_MOUSE	DNA mismatch repair protein Msh2 (MutS protein homolog 2)	Msh2	935	843.472	21.09	High	0	0.000932	17683.1	5.5	10.5	0.03	H-2 Kb
Y3	MHC-DB	High	INAARGLGL	9		1	1	P43247	MSH2_MOUSE	DNA mismatch repair protein Msh2 (MutS protein homolog 2)	Msh2	935	884.531	28.49	High	0.001	0.000932	45208.8	55	1077.3	1.9	H-2 Kb
Y3	MHC-DB	High	ATFDFSQYM	9		1	1	P43247	MSH2_MOUSE	DNA mismatch repair protein Msh2 (MutS protein homolog 2)	Msh2	935	1109.46	27.75	High	0.003	0.001933	11153.1	3	26.5	0.08	H-2 Kb
Y3	MHC-DB	High	AVIKFLEL	8		1	3	P43247	MSH2_MOUSE	DNA mismatch repair protein Msh2 (MutS protein homolog 2)	Msh2	935	932.582	52.61	High	0	4.93e-15	19761.6	6.5	70.5	0.2	H-2 Kb
B22	MHC-DB	High	KSLVNKGTL	9		1	3	P43275	H11_MOUSE	Histone H1.1 (H1 VAR.3) (Histone H1a) (H1a)	Hist1h1a H1a H1f1	213	959.588	41.93	High	0	0.0001695	33.7	0.025	1374.4	2.5	H-2 Db
Y3	MHC-DB	High	KSLVNKGTL	9		1	2	P43275	H11_MOUSE	Histone H1.1 (H1 VAR.3) (Histone H1a) (H1a)	Hist1h1a H1a H1f1	213	959.588	14.78	High	0.006	0.02739	33.7	0.025	1374.4	2.5	H-2 Db
B22	MHC-DB	Medium	HSTVNQVPL	9		1	1	P43488	TNFL4_MOUSE	Tumor necrosis factor ligand superfamily member 4 (OX40 ligand) (OX40L) (CD antigen CD252)	Tnfsf4 Ox40l Txgp1l	198	994.532	13.65	Medium	0.042	0.2563	23.7	0.015	3350.8	5	H-2 Db
B22	MHC-DB	High	FGPVNHEEL	9		1	3	P46414	CDN1B_MOUSE	Cyclin-dependent kinase inhibitor 1B (Cyclin-dependent kinase inhibitor p27) (p27Kip1)	Cdkn1b	197	1041.5	29.2	High	0	0.00455	9.1	0.01	5211.2	7	H-2 Db
Y3	MHC-DB	High	FGPVNHEEL	9		1	3	P46414	CDN1B_MOUSE	Cyclin-dependent kinase inhibitor 1B (Cyclin-dependent kinase inhibitor p27) (p27Kip1)	Cdkn1b	197	1041.5	31.59	High	0	2.38e-14	9.1	0.01	5211.2	7	H-2 Db
Y3	MHC-DB	High	QLVFSFNDKL	10		1	1	P46460	NSF_MOUSE	Vesicle-fusing ATPase (EC 3.6.4.6) (N-ethylmaleimide-sensitive fusion protein) (NEM-sensitive fusion protein) (Suppressor of K(+) transport growth defect 2) (Protein SKD2) (Vesicular-fusion protein NSF)	Nsf Skd2	744	1210.65	15.48	High	0.003	0.003768	25875.7	11	1132	2	H-2 Kb
Y3	MHC-DB	High	IGPRFSNL	8		1	1	P46460	NSF_MOUSE	Vesicle-fusing ATPase (EC 3.6.4.6) (N-ethylmaleimide-sensitive fusion protein) (NEM-sensitive fusion protein) (Suppressor of K(+) transport growth defect 2) (Protein SKD2) (Vesicular-fusion protein NSF)	Nsf Skd2	744	903.505	22.65	High	0.006	0.02739	28686.5	13	4.2	0.01	H-2 Kb
Y3	MHC-DB	High	LSFDFKDTDM	10		1	1	P46662	MERL_MOUSE	Merlin (Moesin-ezrin-radixin-like protein) (Neurofibromin-2) (Schwannomin)	Nf2 Nf-2	596	1218.53	22.95	High	0	9.98e-16	17188.1	5.5	1019	1.8	H-2 Kb
Y3	MHC-DB	High	IQWRFVNRI	9		1	4	P46935	NEDD4_MOUSE	E3 ubiquitin-protein ligase NEDD4 (EC 6.3.2.-) (Neural precursor cell expressed developmentally down-regulated protein 4) (NEDD-4)	Nedd4 Kiaa0093 Nedd-4 Nedd4-1 Nedd4a	887	1231.71	23.12	High	0	3.21e-09	8973	2.5	70.9	0.2	H-2 Kb
B22	MHC-DB	High	ISFKFDHL	8		1	1	P47753	CAZA1_MOUSE	F-actin-capping protein subunit alpha-1 (CapZ alpha-1)	Capza1 Cappa1	286	1006.54	22.28	High	0	2.862e-05	7690.7	2	2.7	0.01	H-2 Kb
Y3	MHC-DB	High	ISFKFDHL	8		1	6	P47753	CAZA1_MOUSE	F-actin-capping protein subunit alpha-1 (CapZ alpha-1)	Capza1 Cappa1	286	1006.54	40.12	High	0.003	0.00148	7690.7	2	2.7	0.01	H-2 Kb
B22	MHC-DB	High	LANVNIGSL	9		1	2	P47955	RLA1_MOUSE	60S acidic ribosomal protein P1	Rplp1	114	900.515	44.93	High	0	1.178e-05	149.8	0.09	2798	4.5	H-2 Db
B22	MHC-DB	High	IMGQNVADYM	10	1xOxidation [M2]	1	2	P47962	RL5_MOUSE	60S ribosomal protein L5	Rpl5	297	1157.5	23.76	High	0	0.005433	76.9	0.05	7447.3	9.5	H-2 Db
B22	MHC-DB	High	SAIQNLHSF	9		2	2	P48024	EIF1_MOUSE	Eukaryotic translation initiation factor 1 (eIF1) (Protein translation factor SUI1 homolog)	Eif1 Sui1 Sui1-rs1	113	1016.52	35.94	High	0	0.0008868	10.9	0.01	1880.8	3	H-2 Db
Y3	MHC-DB	High	VAQVTGETPI	10		1	1	P48381	RFX3_MOUSE	Transcription factor RFX3 (Regulatory factor X 3)	Rfx3	749	1014.55	31.69	High	0.002	0.000932	1220	0.4	8115.7	11	H-2 Db
B22	MHC-DB	High	AALVSRTFL	9		1	1	P48410	ABCD1_MOUSE	ATP-binding cassette sub-family D member 1 (Adrenoleukodystrophy protein) (ALDP)	Abcd1 Ald Aldgh	736	977.578	36.5	High	0	5.999e-05	19.7	0.015	1555.1	2.5	H-2 Db
B22	MHC-DB	High	SMKTNREEL	9		1	1	P48725	PCNT_MOUSE	Pericentrin	Pcnt Pcnt2	2898	1107.55	22.55	High	0	0.002729	149	0.09	6698.3	9	H-2 Db
Y3	MHC-DB	High	IQRQMVQL	8	1xOxidation [M5]	1	1	P48725	PCNT_MOUSE	Pericentrin	Pcnt Pcnt2	2898	1031.57	16.91	High	0.007	0.02739	30848	15	1059.6	1.9	H-2 Kb
Y3	MHC-DB	High	IRYFPTQAL	9		1	5	P48962	ADT1_MOUSE	ADP/ATP translocase 1 (ADP,ATP carrier protein 1) (ADP,ATP carrier protein, heart/skeletal muscle isoform T1) (Adenine nucleotide translocator 1) (ANT 1) (Solute carrier family 25 member 4) (mANC1)	Slc25a4 Anc1 Ant1	298	1108.61	57.82	High	0	9.98e-16	25532.8	10	437.1	1	H-2 Kb
B22	MHC-DB	High	NSLLNQGFL	9		1	3	P48972	MYBB_MOUSE	Myb-related protein B (B-Myb) (Myb-like protein 2)	Mybl2 Bmyb	704	1005.54	39.81	High	0	0.0005401	26.3	0.02	4554	6.5	H-2 Db
B22	MHC-DB	High	NAVKNHWNSTI	11		1	1	P48972	MYBB_MOUSE	Myb-related protein B (B-Myb) (Myb-like protein 2)	Mybl2 Bmyb	704	1283.65	35.47	High	0	2.08e-05	545.3	0.25	20060.2	27	H-2 Db
B22	MHC-DB	High	YQLENIQVL	9		1	4	P49025	CTRO_MOUSE	Citron Rho-interacting kinase (CRIK) (EC 2.7.11.1) (Rho-interacting, serine/threonine-protein kinase 21)	Cit Crik	2055	1119.6	52.35	High	0	8.107e-05	12.5	0.01	7950.2	11	H-2 Db
B22	MHC-DB	High	YMGTNIHSL	9		1	1	P49442	INPP_MOUSE	Inositol polyphosphate 1-phosphatase (IPP) (IPPase) (EC 3.1.3.57)	Inpp1	396	1035.49	32.86	High	0	4.426e-06	20.7	0.015	2859.1	4.5	H-2 Db
Y3	MHC-DB	High	SSLLFTQI	8		1	1	P49452	CENPC_MOUSE	Centromere protein C (CENP-C) (Centromere autoantigen C) (Centromere protein C 1) (CENP-C 1)	Cenpc Cenpc1	906	908.509	14.94	High	0	9.1e-14	6499.7	1.7	9.3	0.025	H-2 Kb
B22	MHC-DB	High	AALPNIYEL	9		1	1	P49718	MCM5_MOUSE	DNA replication licensing factor MCM5 (EC 3.6.4.12) (CDC46 homolog) (P1-CDC46)	Mcm5 Cdc46 Mcmd5	733	1003.55	13.25	High	0	0.0009247	9.5	0.01	1876.5	3	H-2 Db
B22	MHC-DB	High	FVQTNISHL	9		1	1	P49772	FLT3L_MOUSE	Fms-related tyrosine kinase 3 ligand (Flt3 ligand) (Flt3L) (SL cytokine)	Flt3lg Flt3l	232	1058.56	27.39	High	0	0.00019	831.9	0.3	1339.5	2.5	H-2 Db
B22	MHC-DB	High	SSIVNKEGL	9		1	4	P49813	TMOD1_MOUSE	Tropomodulin-1 (Erythrocyte tropomodulin) (E-Tmod)	Tmod1 Tmod	359	946.52	46.81	High	0	2.187e-05	67.4	0.05	1079.5	1.9	H-2 Db
Y3	MHC-DB	High	SSIVNKEGL	9		1	3	P49813	TMOD1_MOUSE	Tropomodulin-1 (Erythrocyte tropomodulin) (E-Tmod)	Tmod1 Tmod	359	946.52	29.95	High	0	2.67e-12	67.4	0.05	1079.5	1.9	H-2 Db
Y3	MHC-DB	Medium	VVLKYRHV	8		1	1	P49962	SRP09_MOUSE	Signal recognition particle 9 kDa protein (SRP9)	Srp9	86	1013.63	11.34	Medium	0.016	0.03313	39241.1	28	9.1	0.025	H-2 Kb
B22	MHC-DB	High	YQIAMVHYI	9		1	2	P50096	IMDH1_MOUSE	Inosine-5'-monophosphate dehydrogenase 1 (IMP dehydrogenase 1) (IMPD 1) (IMPDH 1) (EC 1.1.1.205) (IMPDH-I)	Impdh1	514	1137.58	27.95	High	0	4.164e-06	49.8	0.04	9713.7	13	H-2 Db
B22	MHC-DB	High	GSIINISSI	9		1	2	P50171	DHB8_MOUSE	Estradiol 17-beta-dehydrogenase 8 (EC 1.1.1.62) (17-beta-hydroxysteroid dehydrogenase 8) (17-beta-HSD 8) (3-oxoacyl-[acyl-carrier-protein] reductase) (EC 1.1.1.-) (Protein Ke6) (Ke-6) (Testosterone 17-beta-dehydrogenase 8) (EC 1.1.1.239)	Hsd17b8 H2-Ke6 Hke6	259	903.515	22.25	High	0	0.002354	18.4	0.01	5842.9	8	H-2 Db
Y3	MHC-DB	Medium	SIYIPRGV	8		1	1	P50516	VATA_MOUSE	V-type proton ATPase catalytic subunit A (V-ATPase subunit A) (EC 3.6.3.14) (V-ATPase 69 kDa subunit) (Vacuolar proton pump subunit alpha)	Atp6v1a Atp6a1 Atp6a2 Atp6v1a1	617	904.525	13.02	Medium	0.027	0.1211	41380.8	34	224.8	0.6	H-2 Kb
B22	MHC-DB	High	KGIVNEQFL	9		1	2	P50544	ACADV_MOUSE	Very long-chain specific acyl-CoA dehydrogenase, mitochondrial (EC 1.3.8.9) (MVLCAD) (VLCAD)	Acadvl Vlcad	656	1047.58	32.47	High	0	0.0001012	15	0.01	4213.7	6	H-2 Db
Y3	MHC-DB	Medium	AQFKFTVL	8		1	2	P50580	PA2G4_MOUSE	Proliferation-associated protein 2G4 (IRES-specific cellular trans-acting factor 45 kDa) (ITAF45) (Mpp1) (Proliferation-associated protein 1) (Protein p38-2G4)	Pa2g4 Ebp1 Plfap	394	953.546	24.86	Medium	0.011	0.02739	7997.5	2.5	25.6	0.08	H-2 Kb
B22	MHC-DB	High	ALLQNKDVI	9		1	2	P51569	AGAL_MOUSE	Alpha-galactosidase A (EC 3.2.1.22) (Alpha-D-galactosidase A) (Alpha-D-galactoside galactohydrolase) (Melibiase)	Gla Ags	419	1013.6	30.36	High	0	0.001683	41.2	0.03	21418.6	30	H-2 Db
Y3	MHC-DB	High	NAGVFHLPI	9		1	3	P51658	DHB2_MOUSE	Estradiol 17-beta-dehydrogenase 2 (EC 1.1.1.62) (17-beta-hydroxysteroid dehydrogenase type 2) (17-beta-HSD 2) (Testosterone 17-beta-dehydrogenase) (EC 1.1.1.239)	Hsd17b2 Edh17b2	381	967.536	15.88	High	0.005	0.02739	3043	0.8	1900.4	3	H-2 Db
B22	MHC-DB	High	MTDIYLLNL	9		1	1	P51683	CCR2_MOUSE	C-C chemokine receptor type 2 (C-C CKR-2) (CC-CKR-2) (CCR-2) (CCR2) (JE/FIC receptor) (MCP-1 receptor) (CD antigen CD192)	Ccr2 Cmkbr2	373	1095.58	25.48	High	0.003	0.03185	40942.6	32	425.9	1	H-2 Kb
B22	MHC-DB	Medium	YSYMIDNVI	9		1	1	P51863	VA0D1_MOUSE	V-type proton ATPase subunit d 1 (V-ATPase subunit d 1) (P39) (Physophilin) (V-ATPase 40 kDa accessory protein) (V-ATPase AC39 subunit) (Vacuolar proton pump subunit d 1)	Atp6v0d1 Atp6d	351	1117.52	14.25	Medium	0.028	0.1868	1357.1	0.5	2428.3	4	H-2 Db
B22	MHC-DB	High	SQAVNKQQI	9		1	3	P51944	CCNF_MOUSE	Cyclin-F	Ccnf	777	1015.55	38.41	High	0	3.233e-05	251	0.125	13598.5	18	H-2 Db
Y3	MHC-DB	High	SQAVNKQQI	9		1	1	P51944	CCNF_MOUSE	Cyclin-F	Ccnf	777	1015.55	15.42	High	0	0.0001636	251	0.125	13598.5	18	H-2 Db
Y3	MHC-DB	High	SIYAPARL	8		1	2	P51944	CCNF_MOUSE	Cyclin-F	Ccnf	777	890.509	20.6	High	0.003	0.000932	35423.3	21	7.8	0.02	H-2 Kb
Y3	MHC-DB	High	TAFQFLQL	8		1	3	P51945	CCNG1_MOUSE	Cyclin-G1 (Cyclin-G)	Ccng1 Ccng	294	967.525	39.41	High	0	1.263e-06	5712.2	1.5	5.7	0.015	H-2 Kb
B22	MHC-DB	Medium	QALKYVEL	8		1	1	P51945	CCNG1_MOUSE	Cyclin-G1 (Cyclin-G)	Ccng1 Ccng	294	963.551	10.14	Medium	0.019	0.1454	23109.9	8.5	82.7	0.25	H-2 Kb
Y3	MHC-DB	High	QALKYVEL	8		1	1	P51945	CCNG1_MOUSE	Cyclin-G1 (Cyclin-G)	Ccng1 Ccng	294	963.551	15.83	High	0.003	0.003654	23109.9	8.5	82.7	0.25	H-2 Kb
B22	MHC-DB	High	SQYRFTVSDL	10		1	3	P51945	CCNG1_MOUSE	Cyclin-G1 (Cyclin-G)	Ccng1 Ccng	294	1215.6	50.77	High	0	4.96e-07	4952.9	1.3	93.4	0.25	H-2 Kb
B22	MHC-DB	High	YQKENKDVI	9		1	4	P51949	MAT1_MOUSE	CDK-activating kinase assembly factor MAT1 (CDK7/cyclin-H assembly factor) (Menage a trois) (RING finger protein MAT1) (p35) (p36)	Mnat1 Mat1	309	1136.59	23.93	High	0	0.0001483	134	0.08	30932.5	55	H-2 Db
B22	MHC-DB	High	VGPKNKTSI	9		1	4	P52479	UBP10_MOUSE	Ubiquitin carboxyl-terminal hydrolase 10 (EC 3.4.19.12) (Deubiquitinating enzyme 10) (Ubiquitin thioesterase 10) (Ubiquitin-specific-processing protease 10)	Usp10 Kiaa0190 Ode-1 Uchrp	792	943.557	35.19	High	0	0.0002892	79.2	0.05	5944.9	8	H-2 Db
B22	MHC-DB	Medium	MALHNPQYI	9	1xOxidation [M1]	1	1	P52479	UBP10_MOUSE	Ubiquitin carboxyl-terminal hydrolase 10 (EC 3.4.19.12) (Deubiquitinating enzyme 10) (Ubiquitin thioesterase 10) (Ubiquitin-specific-processing protease 10)	Usp10 Kiaa0190 Ode-1 Uchrp	792	1102.54	11.48	Medium	0.045	0.2711	9.8	0.01	4400.3	6	H-2 Db
B22	MHC-DB	High	AMADTFLEHM	10		1	3	P52480	KPYM_MOUSE	Pyruvate kinase PKM (EC 2.7.1.40) (Pyruvate kinase muscle isozyme)	Pkm Pk3 Pkm2 Pykm	531	1165.5	68.78	High	0	3.65e-09	6357.3	1.6	3406.9	5	H-2 Db
B22	MHC-DB	High	AMADTFLEHM	10	1xOxidation [M]	1	5	P52480	KPYM_MOUSE	Pyruvate kinase PKM (EC 2.7.1.40) (Pyruvate kinase muscle isozyme)	Pkm Pk3 Pkm2 Pykm	531	1181.5	47.89	High	0	7.66e-06	6357.3	1.6	3406.9	5	H-2 Db
B22	MHC-DB	Medium	LSHRNQEPP	9		1	1	P52875	TM165_MOUSE	Transmembrane protein 165 (TPA-regulated locus protein) (Transmembrane protein PFT27) (Transmembrane protein TPARL)	Tmem165 Tparl	323	1077.54	10.39	Medium	0.021	0.1537	1931.9	0.6	28919.6	46	H-2 Db
B22	MHC-DB	High	SQLQNQANL	9		1	1	P53347	ONCM_MOUSE	Oncostatin-M (OSM)	Osm	263	1015.52	21.55	High	0	0.0001308	27.5	0.02	516.8	1.1	H-2 Db
Y3	MHC-DB	High	AVFSKLVTM	9		1	1	P53349	M3K1_MOUSE	Mitogen-activated protein kinase kinase kinase 1 (EC 2.7.11.25) (MAPK/ERK kinase kinase 1) (MEK kinase 1) (MEKK 1)	Map3k1 Mekk Mekk1	1493	995.559	13.37	High	0	2.103e-05	4659.3	1.2	131.1	0.4	H-2 Kb
B22	MHC-DB	High	ASLGLLQFPI	10		1	1	P53395	ODB2_MOUSE	Lipoamide acyltransferase component of branched-chain alpha-keto acid dehydrogenase complex, mitochondrial (EC 2.3.1.168) (Branched-chain alpha-keto acid dehydrogenase complex component E2) (BCKAD-E2) (BCKADE2) (Dihydrolipoamide acetyltransferase component of branched-chain alpha-keto acid dehydrogenase complex) (Dihydrolipoamide branched chain transacylase) (Dihydrolipoyllysine-residue (2-methyl…	Dbt	482	1058.62	16.31	High	0.004	0.0441	1287	0.5	7596.2	10	H-2 Db
B22	MHC-DB	High	VHVINVDKV	9		1	1	P53612	PGTB2_MOUSE	Geranylgeranyl transferase type-2 subunit beta (EC 2.5.1.60) (Geranylgeranyl transferase type II subunit beta) (GGTase-II-beta) (Rab geranyl-geranyltransferase subunit beta) (Rab GG transferase beta) (Rab GGTase beta) (Rab geranylgeranyltransferase subunit beta) (Type II protein geranyl-geranyltransferase subunit beta)	Rabggtb	339	1022.6	40.69	High	0	0.0004698	1844.5	0.6	6461.7	8.5	H-2 Db
Y3	MHC-DB	Medium	ASYNHSQV	8		1	1	P53762	ARNT_MOUSE	Aryl hydrocarbon receptor nuclear translocator (ARNT protein) (Dioxin receptor, nuclear translocator) (Hypoxia-inducible factor 1-beta) (HIF-1-beta) (HIF1-beta)	Arnt	791	905.411	19.34	Medium	0.018	0.09212	11378.1	3.5	25.4	0.08	H-2 Kb
B22	MHC-DB	High	AMMQEAQL	8		1	1	P53783	SOX1_MOUSE	Transcription factor SOX-1	Sox1 Sox-1	391	921.417	17.67	High	0.002	0.01266	15915.8	5	807.3	1.5	H-2 Kb
Y3	MHC-DB	High	ISLEFRNL	8		1	3	P53798	FDFT_MOUSE	Squalene synthase (SQS) (SS) (EC 2.5.1.21) (FPP:FPP farnesyltransferase) (Farnesyl-diphosphate farnesyltransferase)	Fdft1 Erg9	416	991.557	44.2	High	0	9.98e-16	20386.2	7	2.5	0.01	H-2 Kb
Y3	MHC-DB	High	STLLFAHI	8		1	1	P53995	APC1_MOUSE	Anaphase-promoting complex subunit 1 (APC1) (Cyclosome subunit 1) (Mitotic checkpoint regulator) (Testis-specific gene 24 protein)	Anapc1 Mcpr Tsg24	1944	901.514	31.11	High	0	3.09e-11	14035	4	4.8	0.01	H-2 Kb
B22	MHC-DB	High	HSLVLVDEL	9		1	2	P54276	MSH6_MOUSE	DNA mismatch repair protein Msh6 (G/T mismatch-binding protein) (GTBP) (GTMBP) (MutS-alpha 160 kDa subunit) (p160)	Msh6 Gtmbp	1358	1024.57	21.16	High	0.003	0.03683	260.9	0.125	5396.9	7.5	H-2 Db
Y3	MHC-DB	High	VSYWFDQRF	9		1	2	P54751	SIA4A_MOUSE	CMP-N-acetylneuraminate-beta-galactosamide-alpha-2,3-sialyltransferase 1 (Alpha 2,3-ST 1) (Beta-galactoside alpha-2,3-sialyltransferase 1) (EC 2.4.99.4) (Gal-NAc6S) (Gal-beta-1,3-GalNAc-alpha-2,3-sialyltransferase) (ST3Gal I) (ST3GalI) (ST3GalA.1) (ST3O) (Sialyltransferase 4A) (SIAT4-A)	St3gal1 Siat4 Siat4a	337	1247.58	40.43	High	0	9.98e-16	22667.6	8	12.4	0.04	H-2 Kb
B22	MHC-DB	High	STITSKMNL	9		1	2	P54775	PRS6B_MOUSE	26S protease regulatory subunit 6B (26S proteasome AAA-ATPase subunit RPT3) (CIP21) (MB67-interacting protein) (MIP224) (Proteasome 26S subunit ATPase 4) (Tat-binding protein 7) (TBP-7)	Psmc4 Tbp7	418	994.524	34.08	High	0	0.0004585	11543.9	3.5	404.4	0.9	H-2 Kb
B22	MHC-DB	High	MTVQCDVYI	9		1	1	P54818	GALC_MOUSE	Galactocerebrosidase (GALCERase) (EC 3.2.1.46) (Galactocerebroside beta-galactosidase) (Galactosylceramidase) (Galactosylceramide beta-galactosidase)	Galc	684	1071.48	10.49	High	0.009	0.07725	3303.9	0.9	8332.3	11	H-2 Db
B22	MHC-DB	High	NQLKNTSTI	9		1	3	P54823	DDX6_MOUSE	Probable ATP-dependent RNA helicase DDX6 (EC 3.6.4.13) (ATP-dependent RNA helicase p54) (DEAD box protein 6) (Oncogene RCK homolog)	Ddx6 Hlr2 Rck	483	1018.55	32.46	High	0	8.666e-05	20.1	0.015	18035.8	24	H-2 Db
Y3	MHC-DB	High	VINFDFPKL	9		1	4	P54823	DDX6_MOUSE	Probable ATP-dependent RNA helicase DDX6 (EC 3.6.4.13) (ATP-dependent RNA helicase p54) (DEAD box protein 6) (Oncogene RCK homolog)	Ddx6 Hlr2 Rck	483	1092.61	52.39	High	0	9.98e-16	21475.2	7.5	530.2	1.1	H-2 Kb
B22	MHC-DB	High	INFDFPKL	8		1	4	P54823	DDX6_MOUSE	Probable ATP-dependent RNA helicase DDX6 (EC 3.6.4.13) (ATP-dependent RNA helicase p54) (DEAD box protein 6) (Oncogene RCK homolog)	Ddx6 Hlr2 Rck	483	993.54	46.41	High	0	1.635e-06	28514.5	13	6.2	0.015	H-2 Kb
Y3	MHC-DB	High	INFDFPKL	8		1	8	P54823	DDX6_MOUSE	Probable ATP-dependent RNA helicase DDX6 (EC 3.6.4.13) (ATP-dependent RNA helicase p54) (DEAD box protein 6) (Oncogene RCK homolog)	Ddx6 Hlr2 Rck	483	993.54	59.52	High	0.003	0.000932	28514.5	13	6.2	0.015	H-2 Kb
B22	MHC-DB	High	FFLINGPEI	9		1	1	P55072	TERA_HUMAN	Transitional endoplasmic reticulum ATPase (TER ATPase) (EC 3.6.4.6) (15S Mg(2+)-ATPase p97 subunit) (Valosin-containing protein) (VCP)	VCP	806	1049.57	11.92	High	0	0.003491	319	0.15	5552.8	7.5	H-2 Db
B22	MHC-DB	High	RLITNSEEI	9		1	3	P55096	ABCD3_MOUSE	ATP-binding cassette sub-family D member 3 (68 kDa peroxisomal membrane protein) (PMP68) (70 kDa peroxisomal membrane protein) (PMP70)	Abcd3 Pmp70 Pxmp1	659	1074.58	27.1	High	0	3.088e-05	83	0.06	15219.8	20	H-2 Db
B22	MHC-DB	High	SSVLNVVSM	9		1	2	P55200	KMT2A_MOUSE	Histone-lysine N-methyltransferase 2A (Lysine N-methyltransferase 2A) (EC 2.1.1.43) (ALL-1) (Myeloid/lymphoid or mixed-lineage leukemia) (Myeloid/lymphoid or mixed-lineage leukemia protein 1) (Zinc finger protein HRX) [Cleaved into: MLL cleavage product N320 (N-terminal cleavage product of 320 kDa) (p320); MLL cleavage product C180 (C-terminal cleavage product of 180 kDa) (p180)]	Kmt2a All1 Hrx Mll Mll1	3966	935.487	28.46	High	0	7.172e-05	10.4	0.01	725.9	1.4	H-2 Db
B22	MHC-DB	High	SAVVDKDFL	9		1	4	P55264	ADK_MOUSE	Adenosine kinase (AK) (EC 2.7.1.20) (Adenosine 5'-phosphotransferase)	Adk	361	993.525	35.49	High	0	0.000367	23.6	0.015	13672.3	18	H-2 Db
B22	MHC-DB	High	NALTNWLTD	9		1	1	P56371	RAB4A_MOUSE	Ras-related protein Rab-4A	Rab4a Rab4	218	1047.51	12.15	High	0.003	0.02619	2847.9	0.8	22894.6	32	H-2 Db
B22	MHC-DB	High	RADFSNEKTI	10		1	2	P56375	ACYP2_MOUSE	Acylphosphatase-2 (EC 3.6.1.7) (Acylphosphatase, muscle type isozyme) (Acylphosphate phosphohydrolase 2)	Acyp2 Acyp	106	1180.6	12.56	High	0.008	0.06873	1549.8	0.5	13544.3	17	H-2 Db
Y3	MHC-DB	High	VAYWRQAGL	9		2	5	P56382	ATP5E_MOUSE	ATP synthase subunit epsilon, mitochondrial (ATPase subunit epsilon)	Atp5e	52	1063.57	48.97	High	0	2.82e-14	20170.1	7	6.3	0.015	H-2 Kb
Y3	MHC-DB	High	EHYEYRHV	8		1	1	P56390	CKS2_MOUSE	Cyclin-dependent kinases regulatory subunit 2 (CKS-2)	Cks2	79	1132.52	17.22	High	0	9.378e-06	45909.7	60	662.6	1.3	H-2 Kb
B22	MHC-DB	High	VDMDFTMTL	9		1	1	P56475	GBRR1_MOUSE	Gamma-aminobutyric acid receptor subunit rho-1 (GABA(A) receptor subunit rho-1) (GABA(C) receptor)	Gabrr1	480	1072.47	18.01	High	0	0.003612	35669.8	21	557.7	1.2	H-2 Kb
Y3	MHC-DB	High	LMRMLQML	8	3xOxidation [M2; M4; M7]	1	1	P56564	EAA1_MOUSE	Excitatory amino acid transporter 1 (Glial high affinity glutamate transporter) (High-affinity neuronal glutamate transporter) (Sodium-dependent glutamate/aspartate transporter 1) (GLAST-1) (Solute carrier family 1 member 3)	Slc1a3 Eaat1 Gmt1	543	1083.54	22.05	High	0.005	0.02531	25456.1	10	1183.8	2	H-2 Kb
Y3	MHC-DB	High	VQYTFDLQL	9		1	4	P56581	TDG_MOUSE	G/T mismatch-specific thymine DNA glycosylase (EC 3.2.2.29) (C-JUN leucine zipper interactive protein JZA-3) (Thymine-DNA glycosylase)	Tdg	421	1126.58	39.93	High	0	9.98e-16	7250.2	1.9	21	0.06	H-2 Kb
Y3	MHC-DB	High	YSFPFQQM	8		1	2	P56581	TDG_MOUSE	G/T mismatch-specific thymine DNA glycosylase (EC 3.2.2.29) (C-JUN leucine zipper interactive protein JZA-3) (Thymine-DNA glycosylase)	Tdg	421	1047.46	14.62	High	0.003	0.003782	10474.2	3	9.9	0.03	H-2 Kb
B22	MHC-DB	High	KALANVATV	9		1	1	P57716	NICA_MOUSE	Nicastrin	Ncstn	708	886.536	35.83	High	0	3.579e-05	6.6	0.01	1819.3	3	H-2 Db
B22	MHC-DB	Medium	TRLLYGFL	8		1	1	P57716	NICA_MOUSE	Nicastrin	Ncstn	708	982.572	11.14	Medium	0.028	0.1893	31994.9	16	679.7	1.3	H-2 Kb
Y3	MHC-DB	High	TIQEFLERI	9		1	4	P57725	SAMN1_MOUSE	SAM domain-containing protein SAMSN-1 (SAM domain, SH3 domain and nuclear localization signals protein 1) (SH3 protein expressed in lymphocytes 2) (SH3-lymphocyte protein 2) (SLy2)	Samsn1	372	1148.63	38.95	High	0	1.59e-09	34549.7	19	530.8	1.1	H-2 Kb
Y3	MHC-DB	High	VIASFKVL	8		1	2	P57780	ACTN4_MOUSE	Alpha-actinin-4 (Non-muscle alpha-actinin 4)	Actn4	912	876.555	35.55	High	0.003	0.000932	28286.2	12	173.6	0.5	H-2 Kb
Y3	MHC-DB	High	RVLDFQKV	8		1	1	P57784	RU2A_MOUSE	U2 small nuclear ribonucleoprotein A' (U2 snRNP A')	Snrpa1	255	1004.59	21.67	High	0.003	0.001445	40502.4	31	764.9	1.5	H-2 Kb
Y3	MHC-DB	Medium	MQAALLYAL	9		1	1	P58043	SESN2_MOUSE	Sestrin-2 (EC 1.11.1.15)	Sesn2	480	993.544	18.95	Medium	0.015	0.02739	4502.7	1.2	3770.5	5.5	H-2 Db
B22	MHC-DB	High	YQVLNEVVI	9		1	2	P58058	NADK_MOUSE	NAD kinase (EC 2.7.1.23) (Poly(P)/ATP NAD kinase)	Nadk	439	1076.6	24.56	High	0	0.000286	7.1	0.01	10424.8	13	H-2 Db
B22	MHC-DB	High	AIVRNLESL	9		1	1	P58064	RT06_MOUSE	28S ribosomal protein S6, mitochondrial (MRP-S6) (S6mt)	Mrps6 Rpms6	125	1014.59	23.92	High	0	0.0003721	263	0.125	1981.7	3.5	H-2 Db
B22	MHC-DB	High	SAVENILEHL	10		1	3	P58064	RT06_MOUSE	28S ribosomal protein S6, mitochondrial (MRP-S6) (S6mt)	Mrps6 Rpms6	125	1124.59	46.68	High	0	7.29e-07	46.7	0.04	6646.3	8.5	H-2 Db
Y3	MHC-DB	High	SAVENILEHL	10		1	2	P58064	RT06_MOUSE	28S ribosomal protein S6, mitochondrial (MRP-S6) (S6mt)	Mrps6 Rpms6	125	1124.59	24.31	High	0	0.0008333	46.7	0.04	6646.3	8.5	H-2 Db
Y3	MHC-DB	High	SGLLFTHL	8		1	1	P58158	B3GA3_MOUSE	Galactosylgalactosylxylosylprotein 3-beta-glucuronosyltransferase 3 (EC 2.4.1.135) (Beta-1,3-glucuronyltransferase 3) (Glucuronosyltransferase I) (GlcAT-I) (UDP-GlcUA:Gal beta-1,3-Gal-R glucuronyltransferase) (GlcUAT-I)	B3gat3	335	887.499	25.26	High	0.002	0.000932	9644.8	3	4.1	0.01	H-2 Kb
B22	MHC-DB	High	RIVENVNVI	9		1	3	P58252	EF2_MOUSE	Elongation factor 2 (EF-2)	Eef2	858	1055.62	39	High	0	0.0006737	260.1	0.125	13547.7	17	H-2 Db
Y3	MHC-DB	Medium	RIVENVNVI	9		1	1	P58252	EF2_MOUSE	Elongation factor 2 (EF-2)	Eef2	858	1055.62	19.79	Medium	0.015	0.02778	260.1	0.125	13547.7	17	H-2 Db
Y3	MHC-DB	High	TTFEHAHNM	9		1	3	P58252	EF2_MOUSE	Elongation factor 2 (EF-2)	Eef2	858	1087.46	40.43	High	0.001	0.000932	13828.2	4	268.3	0.7	H-2 Kb
Y3	MHC-DB	High	VNYDFGHMHV	10		1	3	P58283	RN216_MOUSE	E3 ubiquitin-protein ligase RNF216 (EC 6.3.2.-) (RING finger protein 216) (Triad domain-containing protein 3) (UbcM4-interacting protein 83) (Ubiquitin-conjugating enzyme 7-interacting protein 1)	Rnf216 Triad3 Ubce7ip1 Uip83 Zin	853	1218.54	45.93	High	0	9.98e-16	25564.3	10	15.9	0.05	H-2 Kb
B22	MHC-DB	High	SMAENSIPL	9		1	3	P58462	FOXP1_MOUSE	Forkhead box protein P1 (Forkhead-related transcription factor 1)	Foxp1	705	961.466	28.85	High	0	0.0001264	20.3	0.015	409.6	0.9	H-2 Db
B22	MHC-DB	High	SMAENSIPL	9	1xOxidation [M2]	1	2	P58462	FOXP1_MOUSE	Forkhead box protein P1 (Forkhead-related transcription factor 1)	Foxp1	705	977.461	10.47	High	0.002	0.02382	20.3	0.015	409.6	0.9	H-2 Db
B22	MHC-DB	High	SSHSNKALM	9		1	1	P58501	PAXB1_MOUSE	PAX3- and PAX7-binding protein 1 (PAX3/7BP) (GC-rich sequence DNA-binding factor 1)	Paxbp1 Gcfc Gcfc1	919	974.472	23.54	High	0.002	0.01916	31.8	0.025	630.6	1.3	H-2 Db
Y3	MHC-DB	High	IAECNHRQL	9		1	1	P58682	TLR8_MOUSE	Toll-like receptor 8 (CD antigen CD288)	Tlr8	1032	1083.54	15.51	High	0.007	0.02739	6843.4	1.8	2141.7	3.5	H-2 Db
Y3	MHC-DB	High	VNAQFPRF	8		1	3	P58742	AAAS_MOUSE	Aladin (Adracalin)	Aaas	546	978.516	46.84	High	0	6.9e-07	39636.7	29	322.2	0.8	H-2 Kb
B22	MHC-DB	High	SSPTSTEYI	9		1	3	P58929	GMEB2_MOUSE	Glucocorticoid modulatory element-binding protein 2 (GMEB-2)	Gmeb2	530	984.452	34.45	High	0	0.0007208	38.7	0.025	7123.7	9.5	H-2 Db
B22	MHC-DB	High	TAVTNSARL	9		1	2	P59016	VP33B_MOUSE	Vacuolar protein sorting-associated protein 33B	Vps33b	617	932.516	36.59	High	0	0.0001822	105.2	0.07	368.5	0.9	H-2 Db
B22	MHC-DB	High	ASLVNADKL	9		1	3	P59016	VP33B_MOUSE	Vacuolar protein sorting-associated protein 33B	Vps33b	617	930.526	56.7	High	0	3.991e-05	6.9	0.01	2826.7	4.5	H-2 Db
Y3	MHC-DB	High	SNYKFFLL	8		1	2	P59267	ZDHC2_MOUSE	Palmitoyltransferase ZDHHC2 (EC 2.3.1.225) (Zinc finger DHHC domain-containing protein 2) (DHHC-2)	Zdhhc2	366	1031.56	32.26	High	0	9.98e-16	14609	4.5	2.7	0.01	H-2 Kb
Y3	MHC-DB	Medium	KGIFYLTL	8		1	1	P59268	ZDHC9_MOUSE	Palmitoyltransferase ZDHHC9 (EC 2.3.1.225) (Zinc finger DHHC domain-containing protein 9) (DHHC-9) (DHHC9)	Zdhhc9	364	954.566	14.55	Medium	0.021	0.09212	16005.1	5	166.6	0.5	H-2 Kb
B22	MHC-DB	High	GSVVNSVAL	9		1	3	P59326	YTHD1_MOUSE	YTH domain-containing family protein 1 (Dermatomyositis associated with cancer putative autoantigen 1 homolog) (DACA-1 homolog)	Ythdf1	559	845.473	49.33	High	0	4.922e-06	31.5	0.025	3037.6	4.5	H-2 Db
B22	MHC-DB	High	RALINSRTF	9		1	2	P59598	ASXL1_MOUSE	Putative Polycomb group protein ASXL1 (Additional sex combs-like protein 1)	Asxl1 Kiaa0978	1514	1077.62	26.97	High	0	0.001933	284	0.15	2968.7	4.5	H-2 Db
B22	MHC-DB	High	SAIRGQAEV	9		1	2	P59598	ASXL1_MOUSE	Putative Polycomb group protein ASXL1 (Additional sex combs-like protein 1)	Asxl1 Kiaa0978	1514	930.5	33.05	High	0	0.001432	415	0.2	2501.8	4	H-2 Db
B22	MHC-DB	Medium	SKAPAMSQKI	10	1xOxidation [M6]	1	1	P59598	ASXL1_MOUSE	Putative Polycomb group protein ASXL1 (Additional sex combs-like protein 1)	Asxl1 Kiaa0978	1514	1076.58	11.53	Medium	0.036	0.2269	7481.7	1.9	20489.9	28	H-2 Db
B22	MHC-DB	High	FGYSGDVSPL	10		1	1	P59823	IRPL1_MOUSE	Interleukin-1 receptor accessory protein-like 1 (IL-1-RAPL-1) (IL-1RAPL-1) (IL1RAPL-1) (X-linked interleukin-1 receptor accessory protein-like 1)	Il1rapl1	695	1041.49	13.69	High	0.002	0.01597	1292.3	0.5	4177.7	6	H-2 Db
B22	MHC-DB	High	SVLVNDFFL	9		1	2	P60229	EIF3E_MOUSE	Eukaryotic translation initiation factor 3 subunit E (eIF3e) (Eukaryotic translation initiation factor 3 subunit 6) (MMTV integration site 6) (Mammary tumor-associated protein INT-6) (Viral integration site protein INT-6) (eIF-3 p48)	Eif3e Eif3s6 Int6	445	1053.56	36.71	High	0	0.0002931	24.2	0.015	1269	2.5	H-2 Db
Y3	MHC-DB	Medium	QSSVNSSPV	9		1	1	P60330	ESPL1_MOUSE	Separin (EC 3.4.22.49) (Caspase-like protein ESPL1) (Extra spindle poles-like 1 protein) (Separase)	Espl1 Esp1 Kiaa0165	2118	904.437	13.7	Medium	0.035	0.3489	984.7	0.4	3576	5	H-2 Db
B22	MHC-DB	High	RQGANINEI	9		1	2	P60335	PCBP1_MOUSE	Poly(rC)-binding protein 1 (Alpha-CP1) (Heterogeneous nuclear ribonucleoprotein E1) (hnRNP E1)	Pcbp1	356	1014.53	27.19	High	0	0.001607	191.2	0.1	26032.1	39	H-2 Db
B22	MHC-DB	High	YSIQGQHTI	9		1	1	P60335	PCBP1_MOUSE	Poly(rC)-binding protein 1 (Alpha-CP1) (Heterogeneous nuclear ribonucleoprotein E1) (hnRNP E1)	Pcbp1	356	1046.53	27.05	High	0	0.000387	32.1	0.025	14410.8	19	H-2 Db
B22	MHC-DB	High	ASLSTFQQM	9	1xOxidation [M9]	1	2	P60710	ACTB_MOUSE	Actin, cytoplasmic 1 (Beta-actin) [Cleaved into: Actin, cytoplasmic 1, N-terminally processed]	Actb	375	1028.47	47.67	High	0	7.376e-06	2956	0.8	66.1	0.2	H-2 Kb
Y3	MHC-DB	High	ASLSTFQQM	9		1	3	P60710	ACTB_MOUSE	Actin, cytoplasmic 1 (Beta-actin) [Cleaved into: Actin, cytoplasmic 1, N-terminally processed]	Actb	375	1012.48	62.89	High	0	9.98e-16	2956	0.8	66.1	0.2	H-2 Kb
Y3	MHC-DB	High	ASLSTFQQM	9	1xOxidation [M9]	1	2	P60710	ACTB_MOUSE	Actin, cytoplasmic 1 (Beta-actin) [Cleaved into: Actin, cytoplasmic 1, N-terminally processed]	Actb	375	1028.47	48.14	High	0	3.45e-08	2956	0.8	66.1	0.2	H-2 Kb
Y3	MHC-DB	High	QIYDIFQKL	9		1	4	P60843	IF4A1_MOUSE	Eukaryotic initiation factor 4A-I (eIF-4A-I) (eIF4A-I) (EC 3.6.4.13) (ATP-dependent RNA helicase eIF4A-1)	Eif4a1 Ddx2a Eif4a	406	1167.64	32.59	High	0	9.98e-16	35645.5	21	76.4	0.25	H-2 Kb
B22	MHC-DB	Medium	SRFYLLLL	8		1	1	P60882	MEGF8_MOUSE	Multiple epidermal growth factor-like domains protein 8 (Multiple EGF-like domains protein 8) (Epidermal growth factor-like protein 4) (EGF-like protein 4)	Megf8 Egfl4	2789	1024.62	18.67	Medium	0.011	0.09897	28281.9	12	754.4	1.5	H-2 Kb
B22	MHC-DB	High	AMNVNDLFL	9		1	1	P61021	RAB5B_MOUSE	Ras-related protein Rab-5B	Rab5b	215	1036.51	17.89	High	0	0.0004473	25.4	0.015	4054.2	5.5	H-2 Db
B22	MHC-DB	High	YAGSNFPEHI	10		1	14	P61161	ARP2_MOUSE	Actin-related protein 2 (Actin-like protein 2)	Actr2 Arp2	394	1134.52	58.86	High	0	8.3e-09	53.8	0.04	7417.4	9.5	H-2 Db
Y3	MHC-DB	High	YAGSNFPEHI	10		1	10	P61161	ARP2_MOUSE	Actin-related protein 2 (Actin-like protein 2)	Actr2 Arp2	394	1134.52	63.58	High	0	9.98e-16	53.8	0.04	7417.4	9.5	H-2 Db
B22	MHC-DB	High	TSPVNPAVF	9		1	2	P61166	TM258_MOUSE	Transmembrane protein 258	Tmem258	79	931.488	25.65	High	0.001	0.01096	81	0.05	5145.9	7	H-2 Db
B22	MHC-DB	Medium	KMCMYKYPGM	10		1	1	P61222	ABCE1_MOUSE	ATP-binding cassette sub-family E member 1 (RNase L inhibitor) (Ribonuclease 4 inhibitor) (RNS4I)	Abce1 Rli	599	1251.54	13.58	Medium	0.02	0.1495	15384.7	4.5	391.9	0.9	H-2 Kb
Y3	MHC-DB	Medium	SAVGNDTQL	9		1	1	P61406	EST1A_MOUSE	Telomerase-binding protein EST1A (EC 3.1.-.-) (EST1-like protein A) (Ever shorter telomeres 1A) (Smg-6 homolog) (Telomerase subunit EST1A)	Smg6 Est1a Kiaa0732	1418	904.437	13.05	Medium	0.021	0.09212	58.9	0.04	3166.2	4.5	H-2 Db
Y3	MHC-DB	Medium	VAPEFRRL	8		1	1	P61600	NAA20_MOUSE	N-alpha-acetyltransferase 20 (EC 2.3.1.88) (Methionine N-acetyltransferase) (N-acetyltransferase 5) (N-terminal acetyltransferase B complex catalytic subunit NAA20) (N-terminal acetyltransferase B complex catalytic subunit NAT5) (NatB complex subunit NAT5) (NatB catalytic subunit)	Naa20 Nat5	178	987.573	13.86	Medium	0.024	0.1211	28649.6	13	5.7	0.015	H-2 Kb
Y3	MHC-DB	High	LSARFSGNL	9		2	2	P61620	S61A1_MOUSE	Protein transport protein Sec61 subunit alpha isoform 1 (Sec61 alpha-1)	Sec61a1 Sec61a	476	964.521	35.26	High	0	2.561e-05	32323.4	16	20.4	0.06	H-2 Kb
Y3	MHC-DB	High	IIALFHLL	8		1	3	P61620	S61A1_MOUSE	Protein transport protein Sec61 subunit alpha isoform 1 (Sec61 alpha-1)	Sec61a1 Sec61a	476	939.603	26.66	High	0.002	0.000932	16701.4	5	36.8	0.125	H-2 Kb
B22	MHC-DB	High	TATKNLDSL	9		1	1	P61759	PFD3_MOUSE	Prefoldin subunit 3 (Von Hippel-Lindau-binding protein 1) (VBP-1) (VHL-binding protein 1)	Vbp1 Pfdn3	196	962.515	12.63	High	0.002	0.0142	74.1	0.05	5149.9	7	H-2 Db
B22	MHC-DB	High	AAMKNVTEL	9	1xOxidation [M3]	1	4	P61982	1433G_MOUSE	14-3-3 protein gamma [Cleaved into: 14-3-3 protein gamma, N-terminally processed]	Ywhag	247	992.508	34.66	High	0	4.266e-06	5	0.01	1317.7	2.5	H-2 Db
B22	MHC-DB	High	AAMKNVTEL	9		1	3	P61982	1433G_MOUSE	14-3-3 protein gamma [Cleaved into: 14-3-3 protein gamma, N-terminally processed]	Ywhag	247	976.513	28.44	High	0	0.0002163	5	0.01	1317.7	2.5	H-2 Db
Y3	MHC-DB	High	AAMKNVTEL	9		1	1	P61982	1433G_MOUSE	14-3-3 protein gamma [Cleaved into: 14-3-3 protein gamma, N-terminally processed]	Ywhag	247	976.513	13.79	High	0.002	0.000932	5	0.01	1317.7	2.5	H-2 Db
B22	MHC-DB	High	IAVANAQEL	9		1	4	P62075	TIM13_MOUSE	Mitochondrial import inner membrane translocase subunit Tim13	Timm13 Tim13a Timm13a	95	928.51	46.62	High	0	1.523e-05	10.7	0.01	1554.3	2.5	H-2 Db
B22	MHC-DB	High	IAVANAQELL	10		1	2	P62075	TIM13_MOUSE	Mitochondrial import inner membrane translocase subunit Tim13	Timm13 Tim13a Timm13a	95	1041.59	53.06	High	0	7.524e-06	80.6	0.05	7935.5	11	H-2 Db
Y3	MHC-DB	High	IIFVPVPQL	9		1	1	P62082	RS7_MOUSE	40S ribosomal protein S7	Rps7	194	1025.64	19.38	High	0	1.42e-07	19508.8	6.5	74.1	0.25	H-2 Kb
B22	MHC-DB	High	FIRNQEQM	8	1xOxidation [M8]	1	2	P62192	PRS4_MOUSE	26S protease regulatory subunit 4 (P26s4) (26S proteasome AAA-ATPase subunit RPT2) (Proteasome 26S subunit ATPase 1)	Psmc1	440	1081.51	38.44	High	0	3.906e-05	2576	0.7	16448	22	H-2 Db
B22	MHC-DB	High	FIRNQEQM	8		1	3	P62192	PRS4_MOUSE	26S protease regulatory subunit 4 (P26s4) (26S proteasome AAA-ATPase subunit RPT2) (Proteasome 26S subunit ATPase 1)	Psmc1	440	1065.51	34.29	High	0	0.0001501	2576	0.7	16448	22	H-2 Db
B22	MHC-DB	High	KAVANQTSATF	11		1	3	P62192	PRS4_MOUSE	26S protease regulatory subunit 4 (P26s4) (26S proteasome AAA-ATPase subunit RPT2) (Proteasome 26S subunit ATPase 1)	Psmc1	440	1137.59	59.39	High	0	5.29e-08	747.9	0.3	15371.7	20	H-2 Db
B22	MHC-DB	High	VALRNDSYTL	10		1	1	P62196	PRS8_MOUSE	26S protease regulatory subunit 8 (26S proteasome AAA-ATPase subunit RPT6) (Proteasome 26S subunit ATPase 5) (Proteasome subunit p45) (p45/SUG) (mSUG1)	Psmc5 Sug1	406	1151.61	32.63	High	0	0.00037	16.6	0.01	2431.2	4	H-2 Db
Y3	MHC-DB	High	VVIRGNSIIM	10		1	3	P62309	RUXG_MOUSE	Small nuclear ribonucleoprotein G (snRNP-G) (Sm protein G) (Sm-G) (SmG)	Snrpg	76	1101.64	44.99	High	0	0.0003932	2612.1	0.8	6830.7	9	H-2 Db
Y3	MHC-DB	High	SGVDYRGV	8		1	3	P62313	LSM6_MOUSE	U6 snRNA-associated Sm-like protein LSm6	Lsm6	80	852.421	45.99	High	0.002	0.000932	45970.8	60	431.9	1	H-2 Kb
B22	MHC-DB	Medium	GNANINTSNI	10		1	1	P62500	T22D1_MOUSE	TSC22 domain family protein 1 (Regulatory protein TSC-22) (TGFB-stimulated clone 22 homolog) (TSC22-related inducible leucine zipper 1b) (Transforming growth factor beta-1-induced transcript 4 protein)	Tsc22d1 Kiaa1994 Tgfb1i4 Tilz1b Tsc22	1077	1017.5	10.14	Medium	0.049	0.2896	2216.1	0.7	27264.5	42	H-2 Db
Y3	MHC-DB	High	SFYNELRV	8		1	1	P62737	ACTA_MOUSE	Actin, aortic smooth muscle (Alpha-actin-2)	Acta2 Actsa Actvs	377	1027.52	28.36	High	0	1.107e-06	26706	11	464.1	1	H-2 Kb
B22	MHC-DB	High	LSVLNLVIV	9		1	2	P62754	RS6_MOUSE	40S ribosomal protein S6 (Phosphoprotein NP33)	Rps6	249	969.634	14.42	High	0.005	0.05106	134.1	0.08	2925	4.5	H-2 Db
Y3	MHC-DB	High	SNYNFEKPF	9		1	4	P62827	RAN_MOUSE	GTP-binding nuclear protein Ran (GTPase Ran) (Ras-like protein TC4) (Ras-related nuclear protein)	Ran Rasl2-8	216	1145.53	41.41	High	0	6.88e-09	25418.7	10	33.6	0.1	H-2 Kb
B22	MHC-DB	High	VGVYNGKTF	9		1	2	P62843	RS15_MOUSE	40S ribosomal protein S15 (RIG protein)	Rps15 Rig	145	984.515	56.1	High	0	7.46e-08	5145.4	1.3	6594.2	8.5	H-2 Db
B22	MHC-DB	High	FVIRNIVEA	9		1	3	P62855	RS26_MOUSE	40S ribosomal protein S26	Rps26	115	1060.62	38.33	High	0	0.0004614	199.6	0.125	10528.6	14	H-2 Db
B22	MHC-DB	Medium	AAPRPPPKPM	10		1	2	P62855	RS26_MOUSE	40S ribosomal protein S26	Rps26	115	1061.59	15.93	Medium	0.018	0.1393	6494.4	1.7	19487.5	26	H-2 Db
Y3	MHC-DB	High	SEIEYYAML	9		1	2	P62889	RL30_MOUSE	60S ribosomal protein L30	Rpl30	115	1118.51	21.47	High	0	9.98e-16	22632.8	8	27.8	0.08	H-2 Kb
Y3	MHC-DB	High	AVLKYYKV	8		1	3	P62983	RS27A_MOUSE	Ubiquitin-40S ribosomal protein S27a (Ubiquitin carboxyl extension protein 80) [Cleaved into: Ubiquitin; 40S ribosomal protein S27a]	Rps27a Uba80 Ubcep1	156	983.592	26.78	High	0.003	0.000932	34296	19	177	0.5	H-2 Kb
B22	MHC-DB	High	AIMPNGDHI	9		1	4	P63005	LIS1_MOUSE	Platelet-activating factor acetylhydrolase IB subunit alpha (Lissencephaly-1 protein) (LIS-1) (PAF acetylhydrolase 45 kDa subunit) (PAF-AH 45 kDa subunit) (PAF-AH alpha) (PAFAH alpha)	Pafah1b1 Lis-1 Lis1 Pafaha	410	967.467	23.17	High	0.001	0.008952	332.1	0.175	10533.3	14	H-2 Db
Y3	MHC-DB	High	AIMPNGDHI	9		1	1	P63005	LIS1_MOUSE	Platelet-activating factor acetylhydrolase IB subunit alpha (Lissencephaly-1 protein) (LIS-1) (PAF acetylhydrolase 45 kDa subunit) (PAF-AH 45 kDa subunit) (PAF-AH alpha) (PAFAH alpha)	Pafah1b1 Lis-1 Lis1 Pafaha	410	967.467	12.87	High	0.007	0.02739	332.1	0.175	10533.3	14	H-2 Db
B22	MHC-DB	High	KTVTNAVVTV	10		1	2	P63017	HSP7C_MOUSE	Heat shock cognate 71 kDa protein (Heat shock 70 kDa protein 8)	Hspa8 Hsc70 Hsc73	646	1031.61	21.39	High	0.001	0.00589	678.2	0.3	18178.8	24	H-2 Db
Y3	MHC-DB	High	VGPRYTNL	8		1	4	P63085	MK01_MOUSE	Mitogen-activated protein kinase 1 (MAP kinase 1) (MAPK 1) (EC 2.7.11.24) (ERT1) (Extracellular signal-regulated kinase 2) (ERK-2) (MAP kinase isoform p42) (p42-MAPK) (Mitogen-activated protein kinase 2) (MAP kinase 2) (MAPK 2)	Mapk1 Erk2 Mapk Prkm1	358	919.5	15.14	High	0	3.57e-08	27639.6	12	4.6	0.01	H-2 Kb
B22	MHC-DB	High	SQPESKVFYL	10		1	3	P63101	1433Z_MOUSE	14-3-3 protein zeta/delta (Protein kinase C inhibitor protein 1) (KCIP-1) (SEZ-2)	Ywhaz	245	1197.62	40.56	High	0	3.917e-05	2056.7	0.6	10072.6	13	H-2 Db
B22	MHC-DB	High	VAIQAVLSL	9		1	6	P63260	ACTG_MOUSE	Actin, cytoplasmic 2 (Gamma-actin) [Cleaved into: Actin, cytoplasmic 2, N-terminally processed]	Actg1 Actg	375	913.572	24.02	High	0	0.0001119	2169.4	0.7	545.1	1.1	H-2 Db
Y3	MHC-DB	High	VAIQAVLSL	9		1	5	P63260	ACTG_MOUSE	Actin, cytoplasmic 2 (Gamma-actin) [Cleaved into: Actin, cytoplasmic 2, N-terminally processed]	Actg1 Actg	375	913.572	27.23	High	0.003	0.000932	2169.4	0.7	545.1	1.1	H-2 Db
B22	MHC-DB	High	AALMNQQFL	9		1	1	P63328	PP2BA_MOUSE	Serine/threonine-protein phosphatase 2B catalytic subunit alpha isoform (EC 3.1.3.16) (CAM-PRP catalytic subunit) (Calmodulin-dependent calcineurin A subunit alpha isoform)	Ppp3ca Calna	521	1035.53	32.43	High	0	2.659e-05	4.5	0.01	1285.2	2.5	H-2 Db
B22	MHC-DB	High	AALMNQQFL	9	1xOxidation [M4]	1	1	P63328	PP2BA_MOUSE	Serine/threonine-protein phosphatase 2B catalytic subunit alpha isoform (EC 3.1.3.16) (CAM-PRP catalytic subunit) (Calmodulin-dependent calcineurin A subunit alpha isoform)	Ppp3ca Calna	521	1051.52	16.51	High	0.001	0.0105	4.5	0.01	1285.2	2.5	H-2 Db
Y3	MHC-DB	High	VALDFENEM	9		1	1	P68033	ACTC_MOUSE	Actin, alpha cardiac muscle 1 (Alpha-cardiac actin)	Actc1 Actc	377	1067.47	30.89	High	0.001	0.000932	9649.4	3	102.9	0.3	H-2 Kb
Y3	MHC-DB	High	TFYNELRV	8		1	1	P68134	ACTS_MOUSE	Actin, alpha skeletal muscle (Alpha-actin-1)	Acta1 Acta	377	1041.54	14.62	High	0	3.355e-06	32887.5	17	822.4	1.6	H-2 Kb
B22	MHC-DB	High	RQLFHPEQL	9		1	1	P68373	TBA1C_MOUSE	Tubulin alpha-1C chain (Alpha-tubulin 6) (Alpha-tubulin isotype M-alpha-6) (Tubulin alpha-6 chain)	Tuba1c Tuba6	449	1167.63	11.19	High	0	0.003854	6302.4	1.6	4671	6.5	H-2 Db
Y3	MHC-DB	High	RQLFHPEQL	9		1	1	P68373	TBA1C_MOUSE	Tubulin alpha-1C chain (Alpha-tubulin 6) (Alpha-tubulin isotype M-alpha-6) (Tubulin alpha-6 chain)	Tuba1c Tuba6	449	1167.63	13.69	High	0	5.21e-14	6302.4	1.6	4671	6.5	H-2 Db
B22	MHC-DB	High	SMLQNPLGNVL	11	1xOxidation [M2]	1	6	P70166	CPEB1_MOUSE	Cytoplasmic polyadenylation element-binding protein 1 (CPE-BP1) (CPE-binding protein 1) (mCPEB) (mCPEB-1)	Cpeb1 Cpeb	561	1201.62	69.78	High	0	2.15e-08	108.3	0.07	9738.2	13	H-2 Db
B22	MHC-DB	High	SMLQNPLGNVL	11		1	4	P70166	CPEB1_MOUSE	Cytoplasmic polyadenylation element-binding protein 1 (CPE-BP1) (CPE-binding protein 1) (mCPEB) (mCPEB-1)	Cpeb1 Cpeb	561	1185.63	61.08	High	0	6.915e-06	108.3	0.07	9738.2	13	H-2 Db
Y3	MHC-DB	High	SMLQNPLGNVL	11		1	2	P70166	CPEB1_MOUSE	Cytoplasmic polyadenylation element-binding protein 1 (CPE-BP1) (CPE-binding protein 1) (mCPEB) (mCPEB-1)	Cpeb1 Cpeb	561	1185.63	40.38	High	0	9.98e-16	108.3	0.07	9738.2	13	H-2 Db
B22	MHC-DB	High	AAVENLPTFL	10		1	3	P70168	IMB1_MOUSE	Importin subunit beta-1 (Karyopherin subunit beta-1) (Nuclear factor p97) (Pore targeting complex 97 kDa subunit) (PTAC97) (SCG)	Kpnb1 Impnb	876	1074.58	47.57	High	0	2.908e-06	12.3	0.01	9164.5	12	H-2 Db
B22	MHC-DB	High	NALLNSLEF	9		1	1	P70168	IMB1_MOUSE	Importin subunit beta-1 (Karyopherin subunit beta-1) (Nuclear factor p97) (Pore targeting complex 97 kDa subunit) (PTAC97) (SCG)	Kpnb1 Impnb	876	1020.54	26.42	High	0	0.0006536	258.5	0.125	4122.5	6	H-2 Db
B22	MHC-DB	High	AGPTNVHLI	9		1	1	P70178	SIX5_MOUSE	Homeobox protein SIX5 (DM locus-associated homeodomain protein homolog) (Sine oculis homeobox homolog 5)	Six5 Dmahp	719	921.515	44.5	High	0	0.0003024	19.1	0.015	12856.2	17	H-2 Db
B22	MHC-DB	High	RSIGNKNTI	9		2	2	P70187	MF14A_MOUSE	Hippocampus abundant transcript 1 protein (Major facilitator superfamily domain-containing 14A)	Mfsd14a Hiat1	490	1002.57	26.7	High	0	0.001408	41.3	0.03	9720.2	13	H-2 Db
B22	MHC-DB	High	FHLQNGDVV	9		1	1	P70188	KIFA3_MOUSE	Kinesin-associated protein 3 (KAP-3) (KAP3)	Kifap3	793	1028.52	11.76	High	0	0.002801	147.6	0.09	22389.9	31	H-2 Db
Y3	MHC-DB	High	IIYVFYQM	8		1	2	P70188	KIFA3_MOUSE	Kinesin-associated protein 3 (KAP-3) (KAP3)	Kifap3	793	1076.55	31.56	High	0	9.12e-11	10026.6	3	2.8	0.01	H-2 Kb
Y3	MHC-DB	High	SNLELHSL	8		1	2	P70195	PSB7_MOUSE	Proteasome subunit beta type-7 (EC 3.4.25.1) (Macropain chain Z) (Multicatalytic endopeptidase complex chain Z) (Proteasome subunit Z)	Psmb7 Mmc14	277	912.479	40.6	High	0	1.766e-05	24570.9	9.5	485	1.1	H-2 Kb
Y3	MHC-DB	High	KSFVFSLL	8		1	1	P70213	FV1_MOUSE	Friend virus susceptibility protein 1	Fv1	459	940.55	15.64	High	0.005	0.02296	14526.8	4.5	2.7	0.01	H-2 Kb
B22	MHC-DB	High	YQPMNKFLL	9		1	2	P70218	M4K1_MOUSE	Mitogen-activated protein kinase kinase kinase kinase 1 (EC 2.7.11.1) (Hematopoietic progenitor kinase) (HPK) (MAPK/ERK kinase kinase kinase 1) (MEK kinase kinase 1) (MEKKK 1)	Map4k1 Hpk1	827	1153.61	31.31	High	0	0.0002343	51.2	0.04	3258.6	5	H-2 Db
B22	MHC-DB	High	YQPMNKFLL	9	1xOxidation [M4]	1	1	P70218	M4K1_MOUSE	Mitogen-activated protein kinase kinase kinase kinase 1 (EC 2.7.11.1) (Hematopoietic progenitor kinase) (HPK) (MAPK/ERK kinase kinase kinase 1) (MEK kinase kinase 1) (MEKKK 1)	Map4k1 Hpk1	827	1169.6	13.46	High	0	0.004023	51.2	0.04	3258.6	5	H-2 Db
Y3	MHC-DB	High	KSVLFHTV	8		1	1	P70218	M4K1_MOUSE	Mitogen-activated protein kinase kinase kinase kinase 1 (EC 2.7.11.1) (Hematopoietic progenitor kinase) (HPK) (MAPK/ERK kinase kinase kinase 1) (MEK kinase kinase 1) (MEKKK 1)	Map4k1 Hpk1	827	930.541	14.68	High	0.003	0.000932	14270.5	4.5	130.1	0.4	H-2 Kb
Y3	MHC-DB	High	SGYQPPRL	8		1	2	P70218	M4K1_MOUSE	Mitogen-activated protein kinase kinase kinase kinase 1 (EC 2.7.11.1) (Hematopoietic progenitor kinase) (HPK) (MAPK/ERK kinase kinase kinase 1) (MEK kinase kinase 1) (MEKKK 1)	Map4k1 Hpk1	827	917.484	30.98	High	0.003	0.001002	23845.7	9	80	0.25	H-2 Kb
Y3	MHC-DB	High	KNLDWFPRM	9	1xOxidation [M9]	1	3	P70227	ITPR3_MOUSE	Inositol 1,4,5-trisphosphate receptor type 3 (IP3 receptor isoform 3) (IP3R 3) (InsP3R3) (Type 3 inositol 1,4,5-trisphosphate receptor) (Type 3 InsP3 receptor)	Itpr3	2670	1222.6	35.62	High	0	0.000932	33113.9	17	54.3	0.175	H-2 Kb
B22	MHC-DB	High	FSLYNGILL	9		1	1	P70245	EBP_MOUSE	3-beta-hydroxysteroid-Delta(8),Delta(7)-isomerase (EC 5.3.3.5) (Cholestenol Delta-isomerase) (Delta(8)-Delta(7) sterol isomerase) (D8-D7 sterol isomerase) (Emopamil-binding protein)	Ebp Msi	230	1039.58	16.68	High	0	0.001413	24	0.015	781.7	1.5	H-2 Db
B22	MHC-DB	High	SGVWNVTEL	9		1	3	P70257	NFIX_MOUSE	Nuclear factor 1 X-type (NF1-X) (Nuclear factor 1/X) (CCAAT-box-binding transcription factor) (CTF) (Nuclear factor I/X) (NF-I/X) (NFI-X) (TGGCA-binding protein)	Nfix	488	1004.5	31.78	High	0	0.001783	20.4	0.015	1727.7	3	H-2 Db
B22	MHC-DB	High	IMVRNIDLV	9	1xOxidation [M2]	1	2	P70280	VAMP7_MOUSE	Vesicle-associated membrane protein 7 (VAMP-7) (Synaptobrevin-like protein 1)	Vamp7 Sybl1	220	1088.61	32.74	High	0	0.000246	18.8	0.015	1183.4	2	H-2 Db
Y3	MHC-DB	Medium	QVFIQVNV	8		1	1	P70310	NTR2_MOUSE	Neurotensin receptor type 2 (NT-R-2) (NTR2) (Low-affinity levocabastine-sensitive neurotensin receptor) (NTRL)	Ntsr2	416	946.536	10.51	Medium	0.028	0.1389	41595	34	920.6	1.7	H-2 Kb
B22	MHC-DB	Medium	MSLSMRDPV	9	1xOxidation [M1]	1	1	P70324	TBX3_MOUSE	T-box transcription factor TBX3 (T-box protein 3)	Tbx3	741	1051.49	11.61	Medium	0.024	0.1675	70.1	0.05	842	1.6	H-2 Db
B22	MHC-DB	High	SQLANEKLTQL	11		1	1	P70335	ROCK1_MOUSE	Rho-associated protein kinase 1 (EC 2.7.11.1) (Rho-associated, coiled-coil-containing protein kinase 1) (Rho-associated, coiled-coil-containing protein kinase I) (ROCK-I) (p160 ROCK-1) (p160ROCK)	Rock1	1354	1244.68	16.09	High	0	0.0008224	319.4	0.15	8608.9	11	H-2 Db
B22	MHC-DB	Medium	YSNIPVTSL	9		1	1	P70365	NCOA1_MOUSE	Nuclear receptor coactivator 1 (NCoA-1) (EC 2.3.1.48) (Nuclear receptor coactivator protein 1) (mNRC-1) (Steroid receptor coactivator 1) (SRC-1)	Ncoa1 Src1	1447	993.525	10.84	Medium	0.015	0.121	3036.3	0.8	2360.9	3.5	H-2 Db
B22	MHC-DB	High	GAVTNVKVI	9		1	4	P70372	ELAV1_MOUSE	ELAV-like protein 1 (Elav-like generic protein) (Hu-antigen R) (HuR) (MelG)	Elavl1 Elra Hua	326	900.551	44.75	High	0	6.689e-06	48.6	0.04	21829.7	30	H-2 Db
Y3	MHC-DB	High	GAVTNVKVI	9		1	1	P70372	ELAV1_MOUSE	ELAV-like protein 1 (Elav-like generic protein) (Hu-antigen R) (HuR) (MelG)	Elavl1 Elra Hua	326	900.551	26.33	High	0	2.19e-09	48.6	0.04	21829.7	30	H-2 Db
B22	MHC-DB	High	INVPNAEVL	9		1	3	P70398	USP9X_MOUSE	Probable ubiquitin carboxyl-terminal hydrolase FAF-X (EC 3.4.19.12) (Deubiquitinating enzyme FAF-X) (Fat facets homolog) (Fat facets protein-related, X-linked) (Ubiquitin carboxyl-terminal hydrolase FAM) (Ubiquitin thioesterase FAF-X) (Ubiquitin-specific protease 9, X chromosome) (Ubiquitin-specific-processing protease FAF-X)	Usp9x Fafl Fam	2559	968.541	51.71	High	0	4.687e-06	755.3	0.3	5159.2	7	H-2 Db
B22	MHC-DB	Medium	ITFTNNQL	8		1	1	P70669	PHEX_MOUSE	Metalloendopeptidase homolog PEX (EC 3.4.24.-) (Phosphate regulating neutral endopeptidase) (Vitamin D-resistant hypophosphatemic rickets protein) (X-linked hypophosphatemia protein) (HYP)	Phex Hyp Pex	749	950.494	14.02	Medium	0.026	0.18	13305.1	4	203.4	0.5	H-2 Kb
B22	MHC-DB	High	SALVNVGAPV	10		1	1	P70670	NACAM_MOUSE	Nascent polypeptide-associated complex subunit alpha, muscle-specific form (Alpha-NAC, muscle-specific form) (skNAC)	Naca Gm1878	2187	926.531	26.25	High	0	0.0003334	8.4	0.01	2589	4	H-2 Db
B22	MHC-DB	High	FGLQNFPEL	9		1	2	P70697	DCUP_MOUSE	Uroporphyrinogen decarboxylase (UPD) (URO-D) (EC 4.1.1.37)	Urod	367	1064.54	24.78	High	0	0.003944	20.2	0.015	315.4	0.8	H-2 Db
Y3	MHC-DB	High	AVVEFSRNV	9		1	1	P70698	PYRG1_MOUSE	CTP synthase 1 (EC 6.3.4.2) (CTP synthetase 1) (UTP--ammonia ligase 1)	Ctps1 Ctps	591	1020.55	27.39	High	0	3.11e-11	40621.4	31	113.2	0.3	H-2 Kb
B22	MHC-DB	High	DSLVNQEVL	9		1	3	P70700	RPA2_MOUSE	DNA-directed RNA polymerase I subunit RPA2 (RNA polymerase I subunit 2) (EC 2.7.7.6) (DNA-directed RNA polymerase I 135 kDa polypeptide) (RPA135)	Polr1b Rpa2 Rpo1-2	1135	1016.53	44.31	High	0	9.938e-06	62.3	0.04	14656.5	19	H-2 Db
Y3	MHC-DB	High	ITWNVGPL	8		1	2	P79457	UTY_MOUSE	Histone demethylase UTY (EC 1.14.11.-) (Male-specific histocompatibility antigen H-YDB) (Ubiquitously transcribed TPR protein on the Y chromosome) (Ubiquitously transcribed Y chromosome tetratricopeptide repeat protein)	Uty Kdm6c	1212	899.499	15.55	High	0.003	0.0009323	9293.4	2.5	34	0.1	H-2 Kb
Y3	MHC-DB	High	KTFSYAGF	8		1	2	P80313	TCPH_MOUSE	T-complex protein 1 subunit eta (TCP-1-eta) (CCT-eta) [Cleaved into: T-complex protein 1 subunit eta, N-terminally processed]	Cct7 Ccth	544	920.451	23.81	High	0.005	0.02454	42809.5	39	16.7	0.05	H-2 Kb
Y3	MHC-DB	High	STFDHPEL	8		1	3	P80314	TCPB_MOUSE	T-complex protein 1 subunit beta (TCP-1-beta) (CCT-beta)	Cct2 Cctb	535	945.431	16.88	High	0.004	0.02296	29964.1	14	132.3	0.4	H-2 Kb
B22	MHC-DB	High	VTITNDGATI	10		1	2	P80316	TCPE_MOUSE	T-complex protein 1 subunit epsilon (TCP-1-epsilon) (CCT-epsilon)	Cct5 Ccte Kiaa0098	541	1004.53	45.32	High	0	2.885e-06	73.4	0.05	7894.8	10	H-2 Db
B22	MHC-DB	High	YAMRAFADAL	10		1	2	P80316	TCPE_MOUSE	T-complex protein 1 subunit epsilon (TCP-1-epsilon) (CCT-epsilon)	Cct5 Ccte Kiaa0098	541	1128.55	34.51	High	0	7.17e-07	390.8	0.175	437.5	1	H-2 Db
B22	MHC-DB	Medium	IVAGMSMETL	10	2xOxidation [M5; M7]	1	1	P82198	BGH3_MOUSE	Transforming growth factor-beta-induced protein ig-h3 (Beta ig-h3)	Tgfbi	683	1083.51	11.86	Medium	0.015	0.1213	5458.5	1.4	7199.5	9.5	H-2 Db
B22	MHC-DB	High	KSISNPPGSNL	11		1	3	P83741	WNK1_MOUSE	Serine/threonine-protein kinase WNK1 (EC 2.7.11.1) (Protein kinase lysine-deficient 1) (Protein kinase with no lysine 1)	Wnk1 Hsn2 Prkwnk1	2377	1113.59	65.2	High	0	3.59e-08	1771.4	0.6	10553.4	14	H-2 Db
B22	MHC-DB	High	YLVVNPNYL	9		1	3	P97311	MCM6_MOUSE	DNA replication licensing factor MCM6 (EC 3.6.4.12) (Mis5 homolog)	Mcm6 Mcmd6 Mis5	821	1094.59	35.95	High	0	0.0004909	11.8	0.01	9087.9	12	H-2 Db
Y3	MHC-DB	High	RIMEFTTTL	9		1	1	P97313	PRKDC_MOUSE	DNA-dependent protein kinase catalytic subunit (DNA-PK catalytic subunit) (DNA-PKcs) (EC 2.7.11.1) (p460)	Prkdc Xrcc7	4128	1111.58	24.5	High	0	3.51e-05	4892.6	1.3	85.7	0.25	H-2 Kb
Y3	MHC-DB	High	LSIPYRLI	8		1	2	P97313	PRKDC_MOUSE	DNA-dependent protein kinase catalytic subunit (DNA-PK catalytic subunit) (DNA-PKcs) (EC 2.7.11.1) (p460)	Prkdc Xrcc7	4128	974.603	15.43	High	0.005	0.02643	36884.5	23	150.2	0.4	H-2 Kb
B22	MHC-DB	High	SALINLVEF	9		1	3	P97313	PRKDC_MOUSE	DNA-dependent protein kinase catalytic subunit (DNA-PK catalytic subunit) (DNA-PKcs) (EC 2.7.11.1) (p460)	Prkdc Xrcc7	4128	1005.56	35.93	High	0	1.916e-05	20.7	0.015	613.4	1.3	H-2 Db
B22	MHC-DB	High	NQLSNHISSL	10		1	2	P97324	G6PD2_MOUSE	Glucose-6-phosphate 1-dehydrogenase 2 (G6PD) (EC 1.1.1.49)	G6pd2 G6pd-2	513	1112.57	46.93	High	0	0.0007784	876.6	0.4	17322.4	23	H-2 Db
B22	MHC-DB	High	HALDNGLFTL	10		1	2	P97376	FRG1_MOUSE	Protein FRG1 (FSHD region gene 1 protein)	Frg1	258	1100.57	21.55	High	0	0.0002605	353.3	0.175	11588.9	15	H-2 Db
Y3	MHC-DB	High	KSYLFQLL	8		1	3	P97377	CDK2_MOUSE	Cyclin-dependent kinase 2 (EC 2.7.11.22) (Cell division protein kinase 2)	Cdk2 Cdkn2	346	1011.59	32.19	High	0	9.98e-16	9752.2	3	2.4	0.01	H-2 Kb
Y3	MHC-DB	High	EVYLFERI	8		1	1	P97390	VPS45_MOUSE	Vacuolar protein sorting-associated protein 45 (mVps45)	Vps45 Vps45a	570	1068.57	15.39	High	0.002	0.000932	31381.9	15	288.1	0.7	H-2 Kb
B22	MHC-DB	High	SGPINFTVFL	10		1	3	P97457	MLRS_MOUSE	Myosin regulatory light chain 2, skeletal muscle isoform (Fast skeletal myosin light chain 2) (MLC2F)	Mylpf	169	1094.59	38.08	High	0	0.0001712	38.5	0.025	1084.4	1.9	H-2 Db
B22	MHC-DB	High	SGPINFTVF	9		1	3	P97457	MLRS_MOUSE	Myosin regulatory light chain 2, skeletal muscle isoform (Fast skeletal myosin light chain 2) (MLC2F)	Mylpf	169	981.504	29.55	High	0	0.0008577	37.2	0.025	1053.8	1.9	H-2 Db
B22	MHC-DB	High	VSPRGAGYL	9		1	2	P97470	PP4C_MOUSE	Serine/threonine-protein phosphatase 4 catalytic subunit (PP4C) (Pp4) (EC 3.1.3.16) (Protein phosphatase X) (PP-X)	Ppp4c Ppp4 Ppx	307	919.5	17.26	High	0	0.002597	1322.2	0.5	466.9	1	H-2 Db
B22	MHC-DB	High	RALQLLDEV	9		1	2	P97471	SMAD4_MOUSE	Mothers against decapentaplegic homolog 4 (MAD homolog 4) (Mothers against DPP homolog 4) (Deletion target in pancreatic carcinoma 4 homolog) (SMAD family member 4) (SMAD 4) (Smad4)	Smad4 Dpc4 Madh4	551	1056.6	27.76	High	0	0.001457	113.7	0.07	8141.9	11	H-2 Db
Y3	MHC-DB	High	RALQLLDEV	9		1	1	P97471	SMAD4_MOUSE	Mothers against decapentaplegic homolog 4 (MAD homolog 4) (Mothers against DPP homolog 4) (Deletion target in pancreatic carcinoma 4 homolog) (SMAD family member 4) (SMAD 4) (Smad4)	Smad4 Dpc4 Madh4	551	1056.6	17.01	High	0	2.28e-12	113.7	0.07	8141.9	11	H-2 Db
Y3	MHC-DB	High	SNYLFTKL	8		1	1	P97481	EPAS1_MOUSE	Endothelial PAS domain-containing protein 1 (EPAS-1) (HIF-1-alpha-like factor) (HLF) (mHLF) (HIF-related factor) (HRF) (Hypoxia-inducible factor 2-alpha) (HIF-2-alpha) (HIF2-alpha)	Epas1 Hif2a	874	985.535	21.91	High	0	1.7e-10	14843.1	4.5	2.4	0.01	H-2 Kb
Y3	MHC-DB	Medium	IQSTNWQTM	9	1xOxidation [M9]	1	1	P97494	GSH1_MOUSE	Glutamate--cysteine ligase catalytic subunit (EC 6.3.2.2) (GCS heavy chain) (Gamma-ECS) (Gamma-glutamylcysteine synthetase)	Gclc Glclc	637	1124.5	13.93	Medium	0.022	0.09212	339.9	0.175	3051.4	4.5	H-2 Db
Y3	MHC-DB	High	TITSFPRL	8		1	4	P97494	GSH1_MOUSE	Glutamate--cysteine ligase catalytic subunit (EC 6.3.2.2) (GCS heavy chain) (Gamma-ECS) (Gamma-glutamylcysteine synthetase)	Gclc Glclc	637	934.536	31.17	High	0.007	0.02739	32173	16	32.3	0.1	H-2 Kb
Y3	MHC-DB	High	SSFLFWRM	8		1	3	P97783	AF1Q_MOUSE	Protein AF1q	Mllt11 Af1q	90	1073.52	29.25	High	0	9.98e-16	8134.8	2.5	7.8	0.02	H-2 Kb
B22	MHC-DB	High	GSVANKFYV	9		1	1	P97855	G3BP1_MOUSE	Ras GTPase-activating protein-binding protein 1 (G3BP-1) (EC 3.6.4.12) (EC 3.6.4.13) (ATP-dependent DNA helicase VIII) (GAP SH3 domain-binding protein 1) (HDH-VIII)	G3bp1 G3bp	465	984.515	20.05	High	0.002	0.01424	30.1	0.02	11997.9	15	H-2 Db
Y3	MHC-DB	High	SSYAHGGL	8		1	2	P97855	G3BP1_MOUSE	Ras GTPase-activating protein-binding protein 1 (G3BP-1) (EC 3.6.4.12) (EC 3.6.4.13) (ATP-dependent DNA helicase VIII) (GAP SH3 domain-binding protein 1) (HDH-VIII)	G3bp1 G3bp	465	791.368	18.65	High	0.005	0.02739	20404.9	7	6.5	0.02	H-2 Kb
B22	MHC-DB	High	HAIENIDTF	9		1	4	P97929	BRCA2_MOUSE	Breast cancer type 2 susceptibility protein homolog (Fanconi anemia group D1 protein homolog)	Brca2 Fancd1	3329	1059.51	34.39	High	0	8.63e-05	10.4	0.01	9996.9	13	H-2 Db
Y3	MHC-DB	High	HAIENIDTF	9		1	2	P97929	BRCA2_MOUSE	Breast cancer type 2 susceptibility protein homolog (Fanconi anemia group D1 protein homolog)	Brca2 Fancd1	3329	1059.51	31.58	High	0	4.11e-07	10.4	0.01	9996.9	13	H-2 Db
B22	MHC-DB	Medium	MYVLIVVL	8	1xOxidation [M1]	1	1	P97952	SCN1B_MOUSE	Sodium channel subunit beta-1	Scn1b	218	965.574	23.4	Medium	0.027	0.1829	10751.1	3	7955.5	11	H-2 Db
B22	MHC-DB	High	SAPRDLFDM	9		1	3	P98083	SHC1_MOUSE	SHC-transforming protein 1 (SHC-transforming protein A) (Src homology 2 domain-containing-transforming protein C1) (SH2 domain protein C1)	Shc1 Shc ShcA	579	1051.49	25.75	High	0.002	0.01197	373.1	0.175	8805.3	12	H-2 Db
Y3	MHC-DB	High	ASYLLAAL	8		1	3	P99027	RLA2_MOUSE	60S acidic ribosomal protein P2	Rplp2	115	821.477	37.16	High	0.003	0.0009323	10122.3	3	3.4	0.01	H-2 Kb
B22	MHC-DB	High	MRYVASYL	8		1	2	P99027	RLA2_MOUSE	60S acidic ribosomal protein P2	Rplp2	115	1002.51	25.5	High	0	0.001786	31015.3	15	488.4	1.1	H-2 Kb
B22	MHC-DB	High	LMSNNPLATI	10	1xOxidation [M2]	1	1	Q00196	PO2F2_MOUSE	POU domain, class 2, transcription factor 2 (Lymphoid-restricted immunoglobulin octamer-binding protein NF-A2) (Octamer-binding protein 2) (Oct-2) (Octamer-binding transcription factor 2) (OTF-2)	Pou2f2 Oct2 Otf2	463	1089.56	13.02	High	0.008	0.06665	4648.8	1.2	10150.6	13	H-2 Db
B22	MHC-DB	High	AAPAPFLPM	9		1	3	Q00417	TCF7_MOUSE	Transcription factor 7 (TCF-7) (T-cell-specific transcription factor 1) (T-cell factor 1) (TCF-1)	Tcf7 Tcf-1 Tcf1	419	914.481	33.99	High	0	0.000352	459.3	0.2	347.4	0.8	H-2 Db
B22	MHC-DB	High	SMMVKQEGM	9	1xOxidation [M]	1	4	Q00547	HMMR_MOUSE	Hyaluronan mediated motility receptor (Intracellular hyaluronic acid-binding protein) (Receptor for hyaluronan-mediated motility) (CD antigen CD168)	Hmmr Ihabp Rhamm	794	1056.45	33.19	High	0	2.574e-05	4608.5	1.2	735.5	1.4	H-2 Db
B22	MHC-DB	High	SMMVKQEGM	9		1	2	Q00547	HMMR_MOUSE	Hyaluronan mediated motility receptor (Intracellular hyaluronic acid-binding protein) (Receptor for hyaluronan-mediated motility) (CD antigen CD168)	Hmmr Ihabp Rhamm	794	1040.46	29.52	High	0	1.479e-05	4608.5	1.2	735.5	1.4	H-2 Db
B22	MHC-DB	High	SMMVKQEGM	9	2xOxidation [M9; M]	1	2	Q00547	HMMR_MOUSE	Hyaluronan mediated motility receptor (Intracellular hyaluronic acid-binding protein) (Receptor for hyaluronan-mediated motility) (CD antigen CD168)	Hmmr Ihabp Rhamm	794	1072.45	20.67	High	0	4.659e-05	4608.5	1.2	735.5	1.4	H-2 Db
Y3	MHC-DB	High	TNQEYARM	8		1	3	Q00547	HMMR_MOUSE	Hyaluronan mediated motility receptor (Intracellular hyaluronic acid-binding protein) (Receptor for hyaluronan-mediated motility) (CD antigen CD168)	Hmmr Ihabp Rhamm	794	1012.45	44.27	High	0	2.2e-07	43102.7	40	37.5	0.125	H-2 Kb
Y3	MHC-DB	High	TNQEYARM	8	1xOxidation [M8]	1	2	Q00547	HMMR_MOUSE	Hyaluronan mediated motility receptor (Intracellular hyaluronic acid-binding protein) (Receptor for hyaluronan-mediated motility) (CD antigen CD168)	Hmmr Ihabp Rhamm	794	1028.45	24.6	High	0	9.98e-16	43102.7	40	37.5	0.125	H-2 Kb
B22	MHC-DB	High	SGPTNEDLYI	10		1	7	Q01237	HMDH_MOUSE	3-hydroxy-3-methylglutaryl-coenzyme A reductase (HMG-CoA reductase) (EC 1.1.1.34)	Hmgcr	887	1108.52	35.4	High	0	0.0006403	18.6	0.01	25023.8	37	H-2 Db
Y3	MHC-DB	High	SGPTNEDLYI	10		1	3	Q01237	HMDH_MOUSE	3-hydroxy-3-methylglutaryl-coenzyme A reductase (HMG-CoA reductase) (EC 1.1.1.34)	Hmgcr	887	1108.52	35.61	High	0	7.703e-06	18.6	0.01	25023.8	37	H-2 Db
B22	MHC-DB	High	NAVGNPEYL	9		1	2	Q01279	EGFR_MOUSE	Epidermal growth factor receptor (EC 2.7.10.1)	Egfr	1210	976.473	35.86	High	0	0.0005371	22.1	0.015	18916	25	H-2 Db
B22	MHC-DB	High	VAILDSTTI	9		1	3	Q01320	TOP2A_MOUSE	DNA topoisomerase 2-alpha (EC 5.99.1.3) (DNA topoisomerase II, alpha isozyme)	Top2a Top-2 Top2	1528	932.53	48.6	High	0	3.074e-06	27.5	0.02	2910.8	4.5	H-2 Db
Y3	MHC-DB	High	AGPTFNYL	8		1	2	Q01320	TOP2A_MOUSE	DNA topoisomerase 2-alpha (EC 5.99.1.3) (DNA topoisomerase II, alpha isozyme)	Top2a Top-2 Top2	1528	882.436	41.21	High	0.003	0.000932	9605.2	2.5	41.3	0.125	H-2 Kb
Y3	MHC-DB	High	VGINYREV	8		1	2	Q01320	TOP2A_MOUSE	DNA topoisomerase 2-alpha (EC 5.99.1.3) (DNA topoisomerase II, alpha isozyme)	Top2a Top-2 Top2	1528	949.51	39.18	High	0	2.408e-05	15699.6	5	46.2	0.15	H-2 Kb
B22	MHC-DB	High	NSMVLFDHV	9	1xOxidation [M3]	1	4	Q01320	TOP2A_MOUSE	DNA topoisomerase 2-alpha (EC 5.99.1.3) (DNA topoisomerase II, alpha isozyme)	Top2a Top-2 Top2	1528	1077.5	53.23	High	0	6.47e-05	808.3	0.3	952.2	1.7	H-2 Db
B22	MHC-DB	High	NSMVLFDHV	9		1	4	Q01320	TOP2A_MOUSE	DNA topoisomerase 2-alpha (EC 5.99.1.3) (DNA topoisomerase II, alpha isozyme)	Top2a Top-2 Top2	1528	1061.51	49.05	High	0	3.132e-06	808.3	0.3	952.2	1.7	H-2 Db
Y3	MHC-DB	High	IVFTVVGNVL	10		1	1	Q01337	ADA2C_MOUSE	Alpha-2C adrenergic receptor (Alpha-2 adrenergic receptor subtype C4) (Alpha-2C adrenoreceptor) (Alpha-2C adrenoceptor) (Alpha-2CAR)	Adra2c	458	1060.64	14.12	High	0.006	0.02739	22314.5	8	1040.7	1.9	H-2 Kb
B22	MHC-DB	Medium	MKIGLNMGPV	10	2xOxidation [M1; M7]	1	1	Q01341	ADCY6_MOUSE	Adenylate cyclase type 6 (EC 4.6.1.1) (ATP pyrophosphate-lyase 6) (Adenylate cyclase type VI) (Adenylyl cyclase 6) (AC6) (Ca(2+)-inhibitable adenylyl cyclase)	Adcy6	1165	1091.56	10.58	Medium	0.042	0.253	3499.6	1	11592.1	15	H-2 Db
B22	MHC-DB	High	YAMRLMEQM	9		1	3	Q01341	ADCY6_MOUSE	Adenylate cyclase type 6 (EC 4.6.1.1) (ATP pyrophosphate-lyase 6) (Adenylate cyclase type VI) (Adenylyl cyclase 6) (AC6) (Ca(2+)-inhibitable adenylyl cyclase)	Adcy6	1165	1172.53	31.65	High	0	3.152e-05	35.8	0.025	1513.9	2.5	H-2 Db
B22	MHC-DB	High	YAMRLMEQM	9	1xOxidation [M3]	1	1	Q01341	ADCY6_MOUSE	Adenylate cyclase type 6 (EC 4.6.1.1) (ATP pyrophosphate-lyase 6) (Adenylate cyclase type VI) (Adenylyl cyclase 6) (AC6) (Ca(2+)-inhibitable adenylyl cyclase)	Adcy6	1165	1188.52	20.42	High	0	1.872e-05	35.8	0.025	1513.9	2.5	H-2 Db
Y3	MHC-DB	High	TIPLFVQL	8		1	3	Q02248	CTNB1_MOUSE	Catenin beta-1 (Beta-catenin)	Ctnnb1 Catnb	781	930.566	23.75	High	0.003	0.000932	28737.8	13	17.4	0.05	H-2 Kb
Y3	MHC-DB	High	RTYTYEKLL	9		2	1	Q02248	CTNB1_MOUSE	Catenin beta-1 (Beta-catenin)	Ctnnb1 Catnb	781	1186.65	14.72	High	0.003	0.003654	33572	18	43.4	0.15	H-2 Kb
B22	MHC-DB	Medium	LMGLNSADL	9	1xOxidation [M2]	1	1	Q02566	MYH6_MOUSE	Myosin-6 (Myosin heavy chain 6) (Myosin heavy chain, cardiac muscle alpha isoform) (MyHC-alpha)	Myh6 Myhca	1938	949.466	10.19	Medium	0.045	0.2673	2793	0.8	1527.2	2.5	H-2 Db
Y3	MHC-DB	High	SIYEKLIQF	9		1	3	Q02614	S30BP_MOUSE	SAP30-binding protein (Transcriptional regulator protein HCNGP)	Sap30bp Hcngp	308	1140.63	33.2	High	0	9.98e-16	24871.8	9.5	89.8	0.25	H-2 Kb
B22	MHC-DB	High	MAPTSPAPTL	10		1	1	Q02853	MMP11_MOUSE	Stromelysin-3 (SL-3) (ST3) (EC 3.4.24.-) (Matrix metalloproteinase-11) (MMP-11)	Mmp11	492	985.502	11.97	High	0.002	0.02051	1934	0.6	8155.9	11	H-2 Db
Y3	MHC-DB	High	SNVVFKLL	8		1	2	Q03958	PFD6_MOUSE	Prefoldin subunit 6 (Protein Ke2)	Pfdn6 H2-Ke2 Pfd6	127	919.561	40.57	High	0	9.98e-16	31442.7	15	20.7	0.06	H-2 Kb
Y3	MHC-DB	High	SALDWWPKI	9		1	4	Q04690	NF1_MOUSE	Neurofibromin (Neurofibromatosis-related protein NF-1)	Nf1	2841	1115.59	25.42	High	0	5.47e-15	13433.7	4	204.9	0.5	H-2 Kb
B22	MHC-DB	High	YQHINSYQL	9		1	2	Q04692	SMRCD_MOUSE	SWI/SNF-related matrix-associated actin-dependent regulator of chromatin subfamily A containing DEAD/H box 1 (EC 3.6.4.12) (ATP-dependent helicase SMARCAD1) (Enhancer trap locus homolog 1) (Etl-1)	Smarcad1 Etl1 Kiaa1122	1021	1165.56	26.12	High	0	0.002601	17.1	0.01	2507.4	4	H-2 Db
Y3	MHC-DB	High	ISYNFIEKL	9		1	1	Q05A62	DNAL1_MOUSE	Dynein light chain 1, axonemal	Dnal1 Dnalc1	190	1126.61	37.45	High	0	9.98e-16	3965.5	1.1	5.9	0.015	H-2 Kb
Y3	MHC-DB	High	QGPQFVTGV	9		1	1	Q05CL8	LARP7_MOUSE	La-related protein 7 (La ribonucleoprotein domain family member 7)	Larp7 D3Wsu161e	570	932.484	12.52	High	0	9.98e-16	31691.7	16	669.3	1.3	H-2 Kb
Y3	MHC-DB	Medium	QVSVQEFALL	10		1	1	Q06194	FA8_MOUSE	Coagulation factor VIII (Procoagulant component)	F8 Cf8 F8c	2319	1133.62	11.21	Medium	0.028	0.1314	16659.9	5	190.4	0.5	H-2 Kb
B22	MHC-DB	High	LMYSQESL	8	1xOxidation [M2]	1	1	Q06194	FA8_MOUSE	Coagulation factor VIII (Procoagulant component)	F8 Cf8 F8c	2319	986.45	13.78	High	0.004	0.04731	13022	4	592.7	1.2	H-2 Kb
Y3	MHC-DB	High	ATRSFPQL	8		1	4	Q07076	ANXA7_MOUSE	Annexin A7 (Annexin VII) (Annexin-7) (Synexin)	Anxa7 Anx7	463	919.5	40.2	High	0	0.000932	33761.1	18	37.4	0.125	H-2 Kb
B22	MHC-DB	High	YAMENSREHV	10		1	2	Q07113	MPRI_MOUSE	Cation-independent mannose-6-phosphate receptor (CI Man-6-P receptor) (CI-MPR) (M6PR) (300 kDa mannose 6-phosphate receptor) (MPR 300) (Insulin-like growth factor 2 receptor) (Insulin-like growth factor II receptor) (IGF-II receptor) (M6P/IGF2 receptor) (M6P/IGF2R) (CD antigen CD222)	Igf2r	2483	1235.55	21.59	High	0	0.0002644	25.1	0.015	12529.9	16	H-2 Db
B22	MHC-DB	High	VSISNLGVAKI	11		1	3	Q07113	MPRI_MOUSE	Cation-independent mannose-6-phosphate receptor (CI Man-6-P receptor) (CI-MPR) (M6PR) (300 kDa mannose 6-phosphate receptor) (MPR 300) (Insulin-like growth factor 2 receptor) (Insulin-like growth factor II receptor) (IGF-II receptor) (M6P/IGF2 receptor) (M6P/IGF2R) (CD antigen CD222)	Igf2r	2483	1100.67	38.85	High	0	0.0001316	252	0.125	4006.6	5.5	H-2 Db
Y3	MHC-DB	Medium	TAPAKLVSF	9		1	1	Q07113	MPRI_MOUSE	Cation-independent mannose-6-phosphate receptor (CI Man-6-P receptor) (CI-MPR) (M6PR) (300 kDa mannose 6-phosphate receptor) (MPR 300) (Insulin-like growth factor 2 receptor) (Insulin-like growth factor II receptor) (IGF-II receptor) (M6P/IGF2 receptor) (M6P/IGF2R) (CD antigen CD222)	Igf2r	2483	933.54	11.59	Medium	0.037	0.3489	13660.3	4	1025.8	1.8	H-2 Kb
Y3	MHC-DB	High	VSYKYSKV	8		1	2	Q07113	MPRI_MOUSE	Cation-independent mannose-6-phosphate receptor (CI Man-6-P receptor) (CI-MPR) (M6PR) (300 kDa mannose 6-phosphate receptor) (MPR 300) (Insulin-like growth factor 2 receptor) (Insulin-like growth factor II receptor) (IGF-II receptor) (M6P/IGF2 receptor) (M6P/IGF2R) (CD antigen CD222)	Igf2r	2483	973.535	38.84	High	0	1.31e-07	29827.6	14	2.7	0.01	H-2 Kb
B22	MHC-DB	High	ISPQNGRYQI	10		1	2	Q07174	M3K8_MOUSE	Mitogen-activated protein kinase kinase kinase 8 (EC 2.7.11.25) (Cancer Osaka thyroid oncogene) (Proto-oncogene c-Cot) (Serine/threonine-protein kinase cot) (Tumor progression locus 2) (TPL-2)	Map3k8 Cot Tpl2	467	1175.62	32.38	High	0	0.0001113	176.3	0.1	15726.5	21	H-2 Db
B22	MHC-DB	High	SSPQNQEQI	9		1	3	Q07243	MTF1_MOUSE	Metal regulatory transcription factor 1 (MRE-binding transcription factor) (Transcription factor MTF-1)	Mtf1 Mtf-1	675	1030.48	31.41	High	0	0.001858	16.8	0.01	9446.9	12	H-2 Db
B22	MHC-DB	High	STVTNTRVL	9		1	2	Q07409	CNTN3_MOUSE	Contactin-3 (Brain-derived immunoglobulin superfamily protein 1) (BIG-1) (Plasmacytoma-associated neuronal glycoprotein)	Cntn3 Pang Pcs	1028	990.558	25.68	High	0	4.809e-05	188.5	0.1	3713.9	5.5	H-2 Db
Y3	MHC-DB	High	SAPDFSRNPM	10		1	5	Q07409	CNTN3_MOUSE	Contactin-3 (Brain-derived immunoglobulin superfamily protein 1) (BIG-1) (Plasmacytoma-associated neuronal glycoprotein)	Cntn3 Pang Pcs	1028	1121.5	32.06	High	0	1.03e-08	786.3	0.3	817.2	1.6	H-2 Db
Y3	MHC-DB	High	SAPDFSRNPM	10	1xOxidation [M10]	1	1	Q07409	CNTN3_MOUSE	Contactin-3 (Brain-derived immunoglobulin superfamily protein 1) (BIG-1) (Plasmacytoma-associated neuronal glycoprotein)	Cntn3 Pang Pcs	1028	1137.5	12.76	High	0	9.99e-16	786.3	0.3	817.2	1.6	H-2 Db
Y3	MHC-DB	High	SGYIPARL	8		1	3	Q07832	PLK1_MOUSE	Serine/threonine-protein kinase PLK1 (EC 2.7.11.21) (Polo-like kinase 1) (PLK-1) (Serine/threonine-protein kinase 13) (STPK13)	Plk1 Plk	603	876.494	30.51	High	0.003	0.001448	32139.3	16	12.5	0.04	H-2 Kb
Y3	MHC-DB	High	IGPDFQKGL	9		1	1	Q08093	CNN2_MOUSE	Calponin-2 (Calponin H2, smooth muscle) (Neutral calponin)	Cnn2	305	974.531	22.53	High	0.003	0.002043	44324.8	46	177.6	0.5	H-2 Kb
B22	MHC-DB	Medium	IMTPNILPPV	10	1xOxidation [M2]	1	1	Q08642	PADI2_MOUSE	Protein-arginine deiminase type-2 (EC 3.5.3.15) (Peptidylarginine deiminase II) (Protein-arginine deiminase type II)	Padi2 Pad2 Pdi Pdi2	673	1110.62	14.43	Medium	0.03	0.199	3141.9	0.9	4259.5	6	H-2 Db
B22	MHC-DB	High	SCLLPNSLSL	10		1	1	Q09M02	CBPC5_MOUSE	Cytosolic carboxypeptidase-like protein 5 (EC 3.4.17.-) (ATP/GTP-binding protein-like 5)	Agbl5 Ccp5	886	1046.56	21.04	High	0.004	0.04711	5247.1	1.4	9727.3	13	H-2 Db
B22	MHC-DB	High	VQVPNLESL	9		1	4	Q09XV5	CHD8_MOUSE	Chromodomain-helicase-DNA-binding protein 8 (CHD-8) (EC 3.6.4.12) (ATP-dependent helicase CHD8) (Axis duplication inhibitor) (Duplin)	Chd8 Kiaa1564	2582	998.552	52.55	High	0	1.672e-06	134	0.08	2901.1	4.5	H-2 Db
B22	MHC-DB	High	GVHVNQELL	9		1	3	Q0P5W1	VPS8_MOUSE	Vacuolar protein sorting-associated protein 8 homolog	Vps8 Kiaa0804	1427	1008.55	30.01	High	0	0.0008075	612.1	0.25	7212.9	9.5	H-2 Db
Y3	MHC-DB	High	SASVRKGPL	9		1	1	Q0VAV2	EXPH5_MOUSE	Exophilin-5 (Synaptotagmin-like protein homolog lacking C2 domains b) (SlaC2-b) (Slp homolog lacking C2 domains b)	Exph5 Kiaa0624 Slac2b	1960	914.542	21.28	High	0.003	0.003654	20718.2	7	1007.4	1.8	H-2 Kb
B22	MHC-DB	High	RTIRNQNTV	9		1	2	Q0VBD2	MCM10_MOUSE	Protein MCM10 homolog	Mcm10	885	1101.61	21.94	High	0.002	0.02369	41.1	0.03	6131	8	H-2 Db
B22	MHC-DB	High	PSIKNTLQL	9		1	1	Q0VBV7	CE126_MOUSE	Centrosomal protein of 126 kDa	Cep126 Kiaa1377	1103	1013.6	15.85	High	0	0.002907	3447.4	0.9	6433.9	8.5	H-2 Db
B22	MHC-DB	High	VALSNMNVI	9		1	1	Q11011	PSA_MOUSE	Puromycin-sensitive aminopeptidase (PSA) (EC 3.4.11.14) (Cytosol alanyl aminopeptidase) (AAP-S)	Npepps Psa	920	960.518	24.32	High	0	0.002202	3.2	0.01	1262.5	2.5	H-2 Db
B22	MHC-DB	High	SSVSNKTTL	9		1	3	Q148V7	K1468_MOUSE	LisH domain and HEAT repeat-containing protein KIAA1468	Kiaa1468	1216	936.5	46.33	High	0	5.682e-06	7.2	0.01	1125.9	2	H-2 Db
Y3	MHC-DB	High	SSVSNKTTL	9		1	2	Q148V7	K1468_MOUSE	LisH domain and HEAT repeat-containing protein KIAA1468	Kiaa1468	1216	936.5	24.31	High	0.003	0.005831	7.2	0.01	1125.9	2	H-2 Db
Y3	MHC-DB	High	YASRCSAEI	9		1	1	Q149M0	CL12B_MOUSE	C-type lectin domain family 12 member B	Clec12b	275	999.456	12.37	High	0.006	0.02739	3517.9	1	7253.3	9.5	H-2 Db
Y3	MHC-DB	High	DVYTFNAL	8		1	1	Q14C51	PTCD3_MOUSE	Pentatricopeptide repeat domain-containing protein 3, mitochondrial (28S ribosomal protein S39, mitochondrial) (MRP-S39)	Ptcd3 Mrps39	685	942.457	16.09	High	0	0.000932	29771.1	14	22.5	0.07	H-2 Kb
B22	MHC-DB	High	SQLRLLFTM	9		1	1	Q15021	CND1_HUMAN	Condensin complex subunit 1 (Chromosome condensation-related SMC-associated protein 1) (Chromosome-associated protein D2) (hCAP-D2) (Non-SMC condensin I complex subunit D2) (XCAP-D2 homolog)	NCAPD2 CAPD2 CNAP1 KIAA0159	1401	1108.62	34.1	High	0	0.0008185	134.2	0.08	1452.5	2.5	H-2 Db
B22	MHC-DB	High	KALGNEIVV	9		1	2	Q18PI6	SLAF5_MOUSE	SLAM family member 5 (Leukocyte differentiation antigen CD84) (Signaling lymphocytic activation molecule 5) (CD antigen CD84)	Cd84 Slamf5	329	942.562	18.78	High	0.002	0.02075	139.4	0.08	7465.2	9.5	H-2 Db
Y3	MHC-DB	High	VIQTAAIL	8		1	1	Q2PZL6	FAT4_MOUSE	Protocadherin Fat 4 (FAT tumor suppressor homolog 4) (Fat-like cadherin protein FAT-J)	Fat4 Fatj	4981	828.519	19.74	High	0.005	0.02391	30307.7	14	653.3	1.3	H-2 Kb
B22	MHC-DB	High	SAMLNWTEP	9	1xOxidation [M3]	1	3	Q2QI47	USH2A_MOUSE	Usherin (Usher syndrome type IIa protein homolog) (Usher syndrome type-2A protein homolog)	Ush2A Gm676	5193	1064.47	12.24	High	0.003	0.03898	93.4	0.06	7760.5	10	H-2 Db
B22	MHC-DB	High	ASLPIMFPWPL	11	1xOxidation [M6]	1	1	Q2TA57	ASPH1_MOUSE	Aspartate beta-hydroxylase domain-containing protein 1 (EC 1.14.11.-)	Asphd1	360	1287.68	10.43	High	0.001	0.005838	4701.2	1.2	4028.7	5.5	H-2 Db
Y3	MHC-DB	Medium	TLLKNFPI	8		1	1	Q2WG76	RIPP2_MOUSE	Protein ripply2	Ripply2	128	945.577	16.42	Medium	0.012	0.02739	4810.8	1.3	7188.9	9.5	H-2 Db
B22	MHC-DB	High	SALENAENHV	10		1	2	Q32P12	CQ053_MOUSE	Uncharacterized protein C17orf53 homolog		615	1083.51	45.31	High	0	4.462e-06	39.8	0.03	11855.6	15	H-2 Db
Y3	MHC-DB	High	AAILFSERL	9		1	1	Q3KQJ0	TMM69_MOUSE	Transmembrane protein 69	Tmem69	245	1019.59	30.09	High	0	9.98e-16	4170.7	1.1	39.3	0.125	H-2 Kb
B22	MHC-DB	High	AALEAKQVL	9		1	1	Q3SYK4	VRTN_MOUSE	Vertnin	Vrtn	740	942.562	24.32	High	0.004	0.04933	4504.5	1.2	6670.6	8.5	H-2 Db
Y3	MHC-DB	High	SALRFLNL	8		1	3	Q3TAA7	S11IP_MOUSE	Serine/threonine-protein kinase 11-interacting protein (LKB1-interacting protein 1)	Stk11ip Lip1 Lkb1ip	1072	933.552	28.1	High	0	9.98e-16	7720.7	2	3.3	0.01	H-2 Kb
Y3	MHC-DB	Medium	LLMPYSNL	8		1	1	Q3TBT3	STING_MOUSE	Stimulator of interferon genes protein (mSTING) (Endoplasmic reticulum interferon stimulator) (ERIS) (Mediator of IRF3 activation) (MMITA) (Transmembrane protein 173)	Tmem173 Eris Mita Mpys Sting	378	950.502	22.86	Medium	0.021	0.09212	37689	24	58	0.175	H-2 Kb
B22	MHC-DB	High	KAPDNRETL	9		1	7	Q3TDQ1	STT3B_MOUSE	Dolichyl-diphosphooligosaccharide--protein glycosyltransferase subunit STT3B (Oligosaccharyl transferase subunit STT3B) (STT3-B) (EC 2.4.99.18) (B6dom1 antigen) (Source of immunodominant MHC-associated peptides)	Stt3b Simp	823	1043.55	21.14	High	0.003	0.02924	52.7	0.04	8057.6	11	H-2 Db
Y3	MHC-DB	High	KAPDNRETL	9		1	4	Q3TDQ1	STT3B_MOUSE	Dolichyl-diphosphooligosaccharide--protein glycosyltransferase subunit STT3B (Oligosaccharyl transferase subunit STT3B) (STT3-B) (EC 2.4.99.18) (B6dom1 antigen) (Source of immunodominant MHC-associated peptides)	Stt3b Simp	823	1043.55	26.27	High	0.003	0.000932	52.7	0.04	8057.6	11	H-2 Db
Y3	MHC-DB	High	AVIRFESI	8		1	1	Q3TDQ1	STT3B_MOUSE	Dolichyl-diphosphooligosaccharide--protein glycosyltransferase subunit STT3B (Oligosaccharyl transferase subunit STT3B) (STT3-B) (EC 2.4.99.18) (B6dom1 antigen) (Source of immunodominant MHC-associated peptides)	Stt3b Simp	823	934.536	22.93	High	0.003	0.000932	18818.6	6	248	0.6	H-2 Kb
Y3	MHC-DB	High	VSQYYPKL	8		1	7	Q3TEA8	HP1B3_MOUSE	Heterochromatin protein 1-binding protein 3	Hp1bp3	554	997.535	42.34	High	0	0.0002781	30860.7	15	10.1	0.03	H-2 Kb
B22	MHC-DB	High	FSLAPYRDYL	10		1	3	Q3TEI4	CO039_MOUSE	Uncharacterized protein C15orf39 homolog		1023	1244.63	42.33	High	0	2.826e-06	397.2	0.175	1021.8	1.8	H-2 Db
B22	MHC-DB	High	LAPQNKPEL	9		1	3	Q3TGF2	F107B_MOUSE	Protein FAM107B	Fam107b	131	1009.57	31.05	High	0	2.421e-05	108.1	0.07	6986	9	H-2 Db
Y3	MHC-DB	High	ISFEFRSLL	9		1	3	Q3THF9	CQ10B_MOUSE	Coenzyme Q-binding protein COQ10 homolog B, mitochondrial	Coq10b	240	1111.61	44.75	High	0	9.98e-16	4402	1.2	4.3	0.01	H-2 Kb
Y3	MHC-DB	High	IMYNVTEL	8	1xOxidation [M2]	1	2	Q3TIR1	TPC13_MOUSE	Trafficking protein particle complex subunit 13	Trappc13	417	998.486	28.19	High	0	0.0003257	1003.8	0.4	21	0.06	H-2 Kb
Y3	MHC-DB	High	IMYNVTEL	8		1	2	Q3TIR1	TPC13_MOUSE	Trafficking protein particle complex subunit 13	Trappc13	417	982.491	21.28	High	0	6.55e-07	1003.8	0.4	21	0.06	H-2 Kb
B22	MHC-DB	High	SMGVNDIDI	9		1	3	Q3TIV5	ZC3HF_MOUSE	Zinc finger CCCH domain-containing protein 15 (DRG family-regulatory protein 1) (Epo-immediate response gene protein FM22)	Zc3h15 Dfrp1	426	963.445	37.74	High	0	0.0001379	193	0.1	5318	7	H-2 Db
B22	MHC-DB	High	SMGVNDIDI	9	1xOxidation [M2]	1	2	Q3TIV5	ZC3HF_MOUSE	Zinc finger CCCH domain-containing protein 15 (DRG family-regulatory protein 1) (Epo-immediate response gene protein FM22)	Zc3h15 Dfrp1	426	979.44	18.64	High	0.002	0.02408	193	0.1	5318	7	H-2 Db
Y3	MHC-DB	High	ASPEFTKL	8		1	3	Q3TJZ6	FA98A_MOUSE	Protein FAM98A	Fam98a	515	892.478	38.07	High	0	4.32e-10	19602.5	6.5	20.9	0.06	H-2 Kb
B22	MHC-DB	High	DALENAQAI	9		1	3	Q3TL44	NLRX1_MOUSE	NLR family member X1	Nlrx1	975	944.468	51.47	High	0	7.592e-06	103.1	0.07	15731.1	21	H-2 Db
B22	MHC-DB	High	YTVKNGDSL	9		1	1	Q3TLI0	TPC10_MOUSE	Trafficking protein particle complex subunit 10 (Trafficking protein particle complex subunit TMEM1) (Transport protein particle subunit TMEM1) (TRAPP subunit TMEM1)	Trappc10 Tmem1	1259	996.5	20.22	High	0.002	0.01937	30.5	0.02	8710.1	11	H-2 Db
B22	MHC-DB	High	SSPENKNWLL	10		1	5	Q3TLR7	DTL_MOUSE	Denticleless protein homolog (Lethal(2) denticleless protein homolog) (Meth A retinoic acid-regulated nuclear matrix-associated protein) (Meth A RAMP) (Retinoic acid-regulated nuclear matrix-associated protein)	Dtl Cdt2 L2dtl Ramp	729	1187.61	29.64	High	0	0.0008096	155.3	0.09	12164.3	16	H-2 Db
B22	MHC-DB	High	SSPENKNWL	9		1	4	Q3TLR7	DTL_MOUSE	Denticleless protein homolog (Lethal(2) denticleless protein homolog) (Meth A retinoic acid-regulated nuclear matrix-associated protein) (Meth A RAMP) (Retinoic acid-regulated nuclear matrix-associated protein)	Dtl Cdt2 L2dtl Ramp	729	1074.52	30.18	High	0.002	0.01772	16.9	0.01	6263.9	8.5	H-2 Db
Y3	MHC-DB	High	SSPENKNWL	9		1	3	Q3TLR7	DTL_MOUSE	Denticleless protein homolog (Lethal(2) denticleless protein homolog) (Meth A retinoic acid-regulated nuclear matrix-associated protein) (Meth A RAMP) (Retinoic acid-regulated nuclear matrix-associated protein)	Dtl Cdt2 L2dtl Ramp	729	1074.52	33.17	High	0.002	0.000932	16.9	0.01	6263.9	8.5	H-2 Db
Y3	MHC-DB	High	AAYIWKVSM	9		1	2	Q3TLR7	DTL_MOUSE	Denticleless protein homolog (Lethal(2) denticleless protein homolog) (Meth A retinoic acid-regulated nuclear matrix-associated protein) (Meth A RAMP) (Retinoic acid-regulated nuclear matrix-associated protein)	Dtl Cdt2 L2dtl Ramp	729	1068.55	48.18	High	0	1.04e-13	4693.4	1.2	98.9	0.3	H-2 Kb
B22	MHC-DB	High	MFMVSCKVFL	10	1xOxidation [M3]	1	1	Q3TMP8	TM38A_MOUSE	Trimeric intracellular cation channel type A (TRIC-A) (TRICA) (27 kDa sarcoplasmic reticulum protein) (Mitsugumin-33A) (SPR-27) (Transmembrane protein 38A)	Tmem38a	298	1220.59	25.98	High	0.003	0.03378	2769.5	0.8	8657.3	11	H-2 Db
B22	MHC-DB	Medium	ASQVYAALL	9		1	1	Q3TNA1	XYLB_MOUSE	Xylulose kinase (Xylulokinase) (EC 2.7.1.17)	Xylb	551	935.52	18.96	Medium	0.018	0.141	21149.9	7.5	23.2	0.07	H-2 Kb
Y3	MHC-DB	High	VALVYPKI	8		1	3	Q3TPR7	T184C_MOUSE	Transmembrane protein 184C (Transmembrane protein 34)	Tmem184c Tmem34	525	902.571	29.78	High	0	9.98e-16	14751.4	4.5	42.5	0.125	H-2 Kb
B22	MHC-DB	High	SLIVNKNWL	9		1	1	Q3TQQ9	CA112_MOUSE	Uncharacterized protein C1orf112 homolog		903	1086.63	16.75	High	0	0.002013	55.4	0.04	7379	9.5	H-2 Db
B22	MHC-DB	High	SQVVNVLTSVI	11		1	3	Q3TQQ9	CA112_MOUSE	Uncharacterized protein C1orf112 homolog		903	1158.67	60.11	High	0	5.52e-08	98.4	0.06	18981.8	26	H-2 Db
Y3	MHC-DB	High	SQVVNVLTSVI	11		1	1	Q3TQQ9	CA112_MOUSE	Uncharacterized protein C1orf112 homolog		903	1158.67	14.85	High	0	0.0001482	98.4	0.06	18981.8	26	H-2 Db
Y3	MHC-DB	High	AVLDFISSL	9		1	1	Q3TQQ9	CA112_MOUSE	Uncharacterized protein C1orf112 homolog		903	964.535	22.25	High	0.003	0.000932	24063.9	9	48.8	0.15	H-2 Kb
B22	MHC-DB	High	SGVSNPHVI	9		1	3	Q3TUF7	YETS2_MOUSE	YEATS domain-containing protein 2	Yeats2 Kiaa1197	1407	909.479	45.31	High	0	4.445e-05	12.1	0.01	16985.3	22	H-2 Db
Y3	MHC-DB	High	RGVEFVHV	8		1	1	Q3TW96	UAP1L_MOUSE	UDP-N-acetylhexosamine pyrophosphorylase-like protein 1 (EC 2.7.7.-)	Uap1l1	507	942.516	13.14	High	0	0.0007064	35630.5	21	247.2	0.6	H-2 Kb
B22	MHC-DB	High	DAVKNGDYI	9		1	3	Q3TYA6	MPP8_MOUSE	M-phase phosphoprotein 8	Mphosph8 Mpp8	858	994.484	31.73	High	0.001	0.01142	17.6	0.01	25551.9	38	H-2 Db
B22	MHC-DB	High	TSLLYWQL	8		1	2	Q3TYU2	AT135_MOUSE	Probable cation-transporting ATPase 13A5 (EC 3.6.3.-) (P5-ATPase isoform 5)	Atp13a5	1216	1023.55	14.8	High	0.003	0.03068	16761.7	5.5	30.6	0.09	H-2 Kb
B22	MHC-DB	High	VAVKNSGGFL	10		1	1	Q3TZZ7	ESYT2_MOUSE	Extended synaptotagmin-2 (E-Syt2)	Esyt2 D12Ertd551e Fam62b	845	991.557	32.13	High	0	0.00101	145	0.09	4992.3	7	H-2 Db
B22	MHC-DB	High	RQLENGTTL	9		1	2	Q3TZZ7	ESYT2_MOUSE	Extended synaptotagmin-2 (E-Syt2)	Esyt2 D12Ertd551e Fam62b	845	1031.55	36.01	High	0	0.001454	8	0.01	8574.6	11	H-2 Db
Y3	MHC-DB	High	RQLENGTTL	9		1	2	Q3TZZ7	ESYT2_MOUSE	Extended synaptotagmin-2 (E-Syt2)	Esyt2 D12Ertd551e Fam62b	845	1031.55	22.37	High	0.003	0.000932	8	0.01	8574.6	11	H-2 Db
Y3	MHC-DB	High	STFSFTKV	8		1	1	Q3TZZ7	ESYT2_MOUSE	Extended synaptotagmin-2 (E-Syt2)	Esyt2 D12Ertd551e Fam62b	845	916.477	15.55	High	0	1.2e-14	26416.3	11	7.7	0.02	H-2 Kb
B22	MHC-DB	Medium	LSDISCMQPL	10	1xOxidation [M7]	1	1	Q3U034	METL4_MOUSE	Methyltransferase-like protein 4 (EC 2.1.1.-)	Mettl4	471	1122.52	10.38	Medium	0.011	0.08833	3104.7	0.9	2729.1	4	H-2 Db
B22	MHC-DB	High	RTVGNIEEL	9		1	2	Q3U0B3	DHR11_MOUSE	Dehydrogenase/reductase SDR family member 11 (EC 1.1.-.-) (Short-chain dehydrogenase/reductase family 24C member 1)	Dhrs11 Sdr24c1	260	1030.55	15.96	High	0.008	0.0716	662.2	0.3	11631.9	15	H-2 Db
B22	MHC-DB	High	SQNTNVDKP	9		1	2	Q3U0V1	FUBP2_MOUSE	Far upstream element-binding protein 2 (FUSE-binding protein 2) (KH type-splicing regulatory protein) (KSRP)	Khsrp Fubp2	748	1002.49	19.82	High	0	0.003903	7784.7	2	38477.6	75	H-2 Db
B22	MHC-DB	High	FSNVNLKEV	9		1	3	Q3U1J4	DDB1_MOUSE	DNA damage-binding protein 1 (DDB p127 subunit) (Damage-specific DNA-binding protein 1) (UV-damaged DNA-binding factor)	Ddb1	1140	1049.56	48.58	High	0	1.012e-06	52.9	0.04	6515.6	8.5	H-2 Db
Y3	MHC-DB	High	FSNVNLKEV	9		1	1	Q3U1J4	DDB1_MOUSE	DNA damage-binding protein 1 (DDB p127 subunit) (Damage-specific DNA-binding protein 1) (UV-damaged DNA-binding factor)	Ddb1	1140	1049.56	24.35	High	0	1.08e-11	52.9	0.04	6515.6	8.5	H-2 Db
B22	MHC-DB	High	AAVQNPALTAL	11		1	4	Q3U1N2	SRBP2_MOUSE	Sterol regulatory element-binding protein 2 (SREBP-2) (Sterol regulatory element-binding transcription factor 2) [Cleaved into: Processed sterol regulatory element-binding protein 2]	Srebf2 Srebp2	1130	1068.6	41.06	High	0	0.0001838	63.1	0.04	13504.1	17	H-2 Db
Y3	MHC-DB	High	VQRSFSQV	8		1	2	Q3U1N2	SRBP2_MOUSE	Sterol regulatory element-binding protein 2 (SREBP-2) (Sterol regulatory element-binding transcription factor 2) [Cleaved into: Processed sterol regulatory element-binding protein 2]	Srebf2 Srebp2	1130	950.505	38.12	High	0.003	0.001667	37249.5	24	70.6	0.2	H-2 Kb
Y3	MHC-DB	High	SALFPFSAL	9		1	2	Q3U2A8	SYVM_MOUSE	Valine--tRNA ligase, mitochondrial (EC 6.1.1.9) (Valyl-tRNA synthetase) (ValRS)	Vars2 Kiaa1885 Vars2l	1060	952.514	12.23	High	0.003	0.0216	1847.4	0.6	35.4	0.125	H-2 Kb
B22	MHC-DB	High	YLMKNADYF	9		1	1	Q3U2S4	OTUD5_MOUSE	OTU domain-containing protein 5 (EC 3.4.19.12) (Deubiquitinating enzyme A) (DUBA)	Otud5 DXImx46e Sfc7	566	1164.54	12.18	High	0	0.000267	39.1	0.03	11670.6	15	H-2 Db
Y3	MHC-DB	Medium	LSLAYNKI	8		1	1	Q3U3V8	XRRA1_MOUSE	X-ray radiation resistance-associated protein 1	Xrra1	786	921.54	12.07	Medium	0.011	0.02739	27699.8	12	232.3	0.6	H-2 Kb
B22	MHC-DB	High	VLVKLLEVM	9		1	3	Q3U487	HECD3_MOUSE	E3 ubiquitin-protein ligase HECTD3 (EC 6.3.2.-) (HECT domain-containing protein 3)	Hectd3	861	1043.65	50.28	High	0	4.96e-07	5341.2	1.4	7911	10	H-2 Db
B22	MHC-DB	High	VLVKLLEVM	9	1xOxidation [M9]	1	1	Q3U487	HECD3_MOUSE	E3 ubiquitin-protein ligase HECTD3 (EC 6.3.2.-) (HECT domain-containing protein 3)	Hectd3	861	1059.65	40.32	High	0	1.82e-06	5341.2	1.4	7911	10	H-2 Db
Y3	MHC-DB	High	IGYEHEVL	8		1	3	Q3U4G0	CO041_MOUSE	Uncharacterized protein C15orf41 homolog		281	959.483	25.57	High	0.002	0.000932	20701.8	7	64	0.2	H-2 Kb
B22	MHC-DB	High	YSLQNFEEI	9		1	3	Q3U5C7	PRIC1_MOUSE	Prickle-like protein 1	Prickle1	832	1142.54	32.44	High	0	2.991e-05	3.5	0.01	1348.6	2.5	H-2 Db
Y3	MHC-DB	High	LNYKFPGL	8		1	4	Q3U5C7	PRIC1_MOUSE	Prickle-like protein 1	Prickle1	832	951.53	35.53	High	0.001	0.000932	34264.5	19	3.5	0.01	H-2 Kb
B22	MHC-DB	Medium	FYSLGNYL	8		1	1	Q3U5Q7	CMPK2_MOUSE	UMP-CMP kinase 2, mitochondrial (EC 2.7.4.14) (Nucleoside-diphosphate kinase) (EC 2.7.4.6) (Thymidylate kinase LPS-inducible member) (TYKi)	Cmpk2 Tyki	447	976.477	10.29	Medium	0.015	0.1216	6098.6	1.6	11435.3	15	H-2 Db
Y3	MHC-DB	High	QTFTFTRV	8		1	2	Q3U7R1	ESYT1_MOUSE	Extended synaptotagmin-1 (E-Syt1) (Membrane-bound C2 domain-containing protein)	Esyt1 Fam62a Mbc2	1092	999.526	16.97	High	0.005	0.02296	36926.9	23	8.9	0.025	H-2 Kb
B22	MHC-DB	High	KQLYNLDII	9		1	2	Q3U821	WDR75_MOUSE	WD repeat-containing protein 75 (U3 small nucleolar RNA-associated protein 17 homolog)	Wdr75 Utp17	830	1119.64	33.4	High	0	0.0009391	25.4	0.015	7764.2	10	H-2 Db
Y3	MHC-DB	High	STRVYASM	8		1	1	Q3UB74	TBRG1_MOUSE	Transforming growth factor beta regulator 1 (Nuclear interactor of ARF and Mdm2)	Tbrg1 Niam	406	914.44	11.48	High	0.003	0.003668	37865.1	25	11.6	0.04	H-2 Kb
Y3	MHC-DB	Medium	STRVYASM	8	1xOxidation [M8]	1	1	Q3UB74	TBRG1_MOUSE	Transforming growth factor beta regulator 1 (Nuclear interactor of ARF and Mdm2)	Tbrg1 Niam	406	930.435	15.15	Medium	0.02	0.09212	37865.1	25	11.6	0.04	H-2 Kb
B22	MHC-DB	Medium	KVSANEGFI	9		1	1	Q3UDW8	HGNAT_MOUSE	Heparan-alpha-glucosaminide N-acetyltransferase (EC 2.3.1.78) (Transmembrane protein 76)	Hgsnat D8Ertd354e Tmem76	656	964.51	11.33	Medium	0.042	0.255	7058	1.8	17927.8	24	H-2 Db
Y3	MHC-DB	High	SIWEFKYL	8		1	1	Q3UEN2	FA35A_MOUSE	Protein FAM35A	Fam35a	891	1085.57	23.69	High	0	2.818e-05	15723.7	5	7.9	0.02	H-2 Kb
Y3	MHC-DB	High	KVVEFSEL	8		1	2	Q3UFM5	NOM1_MOUSE	Nucleolar MIF4G domain-containing protein 1 (SGD1 homolog)	Nom1 Gm1040	854	950.519	45.14	High	0	2.96e-15	30030	14	65.2	0.2	H-2 Kb
B22	MHC-DB	High	SSLMKATVL	9		1	1	Q3UFY7	5NT3B_MOUSE	7-methylguanosine phosphate-specific 5'-nucleotidase (7-methylguanosine nucleotidase) (EC 3.1.3.91) (Cytosolic 5'-nucleotidase 3B) (Cytosolic 5'-nucleotidase III-like protein) (cN-III-like protein) (EC 3.1.3.5) (N(7)-methylguanylate 5'-phosphatase)	Nt5c3b Nt5c3l	300	949.539	34.78	High	0	0.0004125	181.9	0.1	348.1	0.8	H-2 Db
B22	MHC-DB	High	GLVGNATVL	9		1	1	Q3UG61	MRGB1_MOUSE	Mas-related G-protein coupled receptor member B1	Mrgprb1 Mrgb1	350	843.493	14.66	High	0	0.00223	1803.8	0.6	21949.5	31	H-2 Db
Y3	MHC-DB	High	GVLRFVNL	8		1	3	Q3UGP8	AG10B_MOUSE	Putative Dol-P-Glc:Glc(2)Man(9)GlcNAc(2)-PP-Dol alpha-1,2-glucosyltransferase (EC 2.4.1.256) (Alpha-1,2-glucosyltransferase ALG10-A) (Alpha-2-glucosyltransferase ALG10-B) (Asparagine-linked glycosylation protein 10 homolog B)	Alg10b	474	917.557	29.76	High	0.003	0.0009358	28244.6	12	30.8	0.09	H-2 Kb
Y3	MHC-DB	Medium	NFYLLYLL	8		1	1	Q3UGP8	AG10B_MOUSE	Putative Dol-P-Glc:Glc(2)Man(9)GlcNAc(2)-PP-Dol alpha-1,2-glucosyltransferase (EC 2.4.1.256) (Alpha-1,2-glucosyltransferase ALG10-A) (Alpha-2-glucosyltransferase ALG10-B) (Asparagine-linked glycosylation protein 10 homolog B)	Alg10b	474	1058.59	22.14	Medium	0.015	0.02739	18408	6	473.6	1	H-2 Kb
B22	MHC-DB	High	AVLTNQETI	9		1	4	Q3UGY8	BIG3_MOUSE	Brefeldin A-inhibited guanine nucleotide-exchange protein 3 (ARFGEF family member 3)	Arfgef3 Big3 D10Bwg1379e Kiaa1244	2170	988.531	49.06	High	0	0.0007835	14.1	0.01	6345.8	8.5	H-2 Db
B22	MHC-DB	High	SALQNFASTF	10		1	3	Q3UGY8	BIG3_MOUSE	Brefeldin A-inhibited guanine nucleotide-exchange protein 3 (ARFGEF family member 3)	Arfgef3 Big3 D10Bwg1379e Kiaa1244	2170	1085.53	51.12	High	0	1.196e-05	51.1	0.04	766.1	1.5	H-2 Db
Y3	MHC-DB	High	VSISFKSL	8		1	1	Q3UHA3	SPTCS_MOUSE	Spatacsin (Spastic paraplegia 11 protein homolog)	Spg11 Kiaa1840	2430	880.514	37.42	High	0	1.13e-08	21597.4	7.5	4.4	0.01	H-2 Kb
B22	MHC-DB	High	TSPINPQHM	9		1	3	Q3UHC0	TNR6C_MOUSE	Trinucleotide repeat-containing gene 6C protein	Tnrc6c Kiaa1582	1690	1024.49	14.51	High	0.002	0.01553	77.5	0.05	3324.9	5	H-2 Db
Y3	MHC-DB	High	RAPAFHQL	8		1	1	Q3UHH1	ZSWM8_MOUSE	Zinc finger SWIM domain-containing protein 8	Zswim8 Kiaa0913	1832	939.516	28.41	High	0	1.92e-12	16410.3	5	65	0.2	H-2 Kb
Y3	MHC-DB	Medium	RAPEMVNL	8		1	1	Q3UHJ0	AAK1_MOUSE	AP2-associated protein kinase 1 (EC 2.7.11.1) (Adaptor-associated kinase 1)	Aak1 Kiaa1048	959	929.487	11.6	Medium	0.022	0.09212	23263.9	8.5	509.7	1.1	H-2 Kb
B22	MHC-DB	High	AAPRSFIFL	9		1	3	Q3UIK4	MET14_MOUSE	N6-adenosine-methyltransferase subunit METTL14 (EC 2.1.1.62) (Methyltransferase-like protein 14)	Mettl14 Kiaa1627	456	1021.58	21.82	High	0	0.001887	164.7	0.1	193.9	0.5	H-2 Db
Y3	MHC-DB	High	VNVDHPINL	9		1	2	Q3UIW5	RNF10_MOUSE	RING finger protein 10 (Sid 2705)	Rnf10 Kiaa0262 Rie2 Sid2705	804	1020.55	46.79	High	0	1.29e-07	39341	28	178.5	0.5	H-2 Kb
B22	MHC-DB	High	FVISNYREQL	10		1	1	Q3UJC8	CE034_MOUSE	Uncharacterized protein C5orf34 homolog		639	1268.66	39.17	High	0	5.665e-06	192.7	0.1	954.3	1.7	H-2 Db
Y3	MHC-DB	High	IWTIATNL	8		1	2	Q3UJF0	GPR55_MOUSE	G-protein coupled receptor 55	Gpr55 Gm218	327	931.525	23.13	High	0	9.98e-16	35762.2	21	741.6	1.4	H-2 Kb
Y3	MHC-DB	High	SQYRFEHL	8		1	5	Q3UJK4	GTPB2_MOUSE	GTP-binding protein 2 (GTP-binding-like protein 2)	Gtpbp2	602	1079.53	13.26	High	0	0.000932	5442.6	1.4	3.8	0.01	H-2 Kb
B22	MHC-DB	High	GALKNIVAV	9		1	4	Q3ULJ0	GPD1L_MOUSE	Glycerol-3-phosphate dehydrogenase 1-like protein (EC 1.1.1.8)	Gpd1l Kiaa0089	351	884.556	31.77	High	0.001	0.007434	28.7	0.02	7041.4	9	H-2 Db
B22	MHC-DB	High	DALTNLTVL	9		1	3	Q3UM45	PP1R7_MOUSE	Protein phosphatase 1 regulatory subunit 7 (Protein phosphatase 1 regulatory subunit 22)	Ppp1r7 Sds22	361	959.541	41.9	High	0	3.235e-06	18.7	0.01	6444.7	8.5	H-2 Db
B22	MHC-DB	High	RAIENIDTL	9		1	4	Q3UM45	PP1R7_MOUSE	Protein phosphatase 1 regulatory subunit 7 (Protein phosphatase 1 regulatory subunit 22)	Ppp1r7 Sds22	361	1044.57	33.07	High	0	9.656e-05	3.4	0.01	4217.3	6	H-2 Db
Y3	MHC-DB	High	RAIENIDTL	9		1	3	Q3UM45	PP1R7_MOUSE	Protein phosphatase 1 regulatory subunit 7 (Protein phosphatase 1 regulatory subunit 22)	Ppp1r7 Sds22	361	1044.57	30.47	High	0	9.98e-16	3.4	0.01	4217.3	6	H-2 Db
B22	MHC-DB	High	ASPANVGTL	9		1	1	Q3UMB5	SMCR8_MOUSE	Smith-Magenis syndrome chromosomal region candidate gene 8 protein homolog	Smcr8	935	829.441	27.15	High	0.001	0.006823	13.3	0.01	2450.6	4	H-2 Db
Y3	MHC-DB	High	VNFTYQFL	8		1	3	Q3UMB9	WASH7_MOUSE	WASH complex subunit 7	Kiaa1033	1173	1031.52	44.56	High	0	9.98e-16	10912	3	2.9	0.01	H-2 Kb
Y3	MHC-DB	Medium	YLHRNFII	8		1	1	Q3UMM4	CDK10_MOUSE	Cyclin-dependent kinase 10 (EC 2.7.11.22) (Cell division protein kinase 10)	Cdk10	360	1075.6	15.12	Medium	0.021	0.09212	5425.7	1.4	12655.8	16	H-2 Db
Y3	MHC-DB	High	STYLFRLM	8		1	3	Q3UN04	UBP30_MOUSE	Ubiquitin carboxyl-terminal hydrolase 30 (EC 3.4.19.12) (Deubiquitinating enzyme 30) (Ubiquitin thioesterase 30) (Ubiquitin-specific-processing protease 30) (Ub-specific protease 30)	Usp30	517	1030.54	45.83	High	0	9.98e-16	16358	5	3.2	0.01	H-2 Kb
Y3	MHC-DB	High	STYLFRLM	8	1xOxidation [M8]	1	2	Q3UN04	UBP30_MOUSE	Ubiquitin carboxyl-terminal hydrolase 30 (EC 3.4.19.12) (Deubiquitinating enzyme 30) (Ubiquitin thioesterase 30) (Ubiquitin-specific-processing protease 30) (Ub-specific protease 30)	Usp30	517	1046.53	42.32	High	0	3.22e-08	16358	5	3.2	0.01	H-2 Kb
B22	MHC-DB	High	GALDTGANVL	10		1	1	Q3UN21	MF4B3_MOUSE	Sodium-dependent glucose transporter 1C (Major facilitator superfamily domain-containing protein 4B3)	Mfsd4b3 Naglt1c	355	930.489	16.89	High	0.007	0.06609	7805.4	2	21277.3	29	H-2 Db
B22	MHC-DB	High	RAIEDADWI	9		1	1	Q3UN90	LYRM9_MOUSE	LYR motif-containing protein 9	Lyrm9	78	1088.54	25.92	High	0	0.001373	42.2	0.03	29736.7	48	H-2 Db
Y3	MHC-DB	High	RIYQFTAA	8		1	1	Q3UND0	SKAP2_MOUSE	Src kinase-associated phosphoprotein 2 (Pyk2/RAFTK-associated protein) (SKAP55 homolog) (SKAP-HOM) (Src family-associated phosphoprotein 2) (Src kinase-associated phosphoprotein 55-related protein) (Src-associated adapter protein with PH and SH3 domains)	Skap2 Prap Ra70 Saps Scap2 Skap55r	358	969.515	20.22	High	0.003	0.000932	26879.9	11	49.9	0.15	H-2 Kb
B22	MHC-DB	High	AGSLRKVETI	10		1	1	Q3UNH4	GRIN1_MOUSE	G protein-regulated inducer of neurite outgrowth 1 (GRIN1)	Gprin1	932	1073.63	13.57	High	0.001	0.006829	4210.9	1.1	18962.9	26	H-2 Db
B22	MHC-DB	High	NVSLQDAAVL	10		1	1	Q3UNZ8	QORL2_MOUSE	Quinone oxidoreductase-like protein 2 (EC 1.-.-.-)		350	1029.56	12.92	High	0.002	0.01715	4383.6	1.2	14179.2	18	H-2 Db
B22	MHC-DB	High	SSPSNIHNI	9		1	3	Q3UQ44	IQGA2_MOUSE	Ras GTPase-activating-like protein IQGAP2	Iqgap2	1575	968.48	31.43	High	0	0.004226	10.6	0.01	2741.3	4	H-2 Db
B22	MHC-DB	High	VSPDNDIYI	9		1	2	Q3UQV5	KBTB8_MOUSE	Kelch repeat and BTB domain-containing protein 8	Kbtbd8 Kiaa1842	599	1035.5	29.31	High	0	0.0004076	117.6	0.07	2945.1	4.5	H-2 Db
B22	MHC-DB	High	VALQEGHSL	9		1	1	Q3URE1	ACSF3_MOUSE	Acyl-CoA synthetase family member 3, mitochondrial (EC 6.2.1.-)	Acsf3	583	953.505	20.72	High	0	0.0002904	2813.9	0.8	3825.2	5.5	H-2 Db
B22	MHC-DB	High	LMPANSLYG	9		1	1	Q3URE9	LIGO2_MOUSE	Leucine-rich repeat and immunoglobulin-like domain-containing nogo receptor-interacting protein 2 (Leucine-rich repeat neuronal protein 6C)	Lingo2 Lrrn6c	606	965.476	11.59	High	0.003	0.03084	5255.3	1.4	21169.6	29	H-2 Db
B22	MHC-DB	High	LGVTNFVHM	9		1	2	Q3USW5	FXRD2_MOUSE	FAD-dependent oxidoreductase domain-containing protein 2	Foxred2 D15Bwg0759e	665	1017.52	56.3	High	0	1.7e-07	96.3	0.06	430.7	1	H-2 Db
Y3	MHC-DB	High	VCMTNHVSSL	10	1xOxidation [M3]	1	1	Q3UTY6	THSD4_MOUSE	Thrombospondin type-1 domain-containing protein 4 (A disintegrin and metalloproteinase with thrombospondin motifs-like protein 6) (ADAMTS-like protein 6) (ADAMTSL-6) (ADAMTS-like protein 4) (ADAMTSL-4)	Thsd4	1018	1106.5	11.08	High	0.003	0.001279	3081.1	0.9	2452.7	4	H-2 Db
B22	MHC-DB	High	STLLNHSFF	9		1	1	Q3UUJ4	STRAA_MOUSE	STE20-related kinase adapter protein alpha (STRAD alpha) (STE20-related adapter protein)	Strada Lyk5 Strad	431	1065.54	27.84	High	0	0.0006461	118.1	0.07	620.9	1.3	H-2 Db
Y3	MHC-DB	High	KALDYIHHM	9		1	1	Q3UUJ4	STRAA_MOUSE	STE20-related kinase adapter protein alpha (STRAD alpha) (STE20-related adapter protein)	Strada Lyk5 Strad	431	1127.57	16.48	High	0	5.04e-09	12907.5	4	336.5	0.8	H-2 Kb
B22	MHC-DB	High	YMNVNNYWI	9		1	2	Q3UUQ7	PGAP1_MOUSE	GPI inositol-deacylase (EC 3.1.-.-) (Post-GPI attachment to proteins factor 1)	Pgap1	922	1216.55	25.05	High	0	2.126e-05	6.7	0.01	10823.4	14	H-2 Db
B22	MHC-DB	Medium	STALDNGHVI	10		1	1	Q3UUY6	PROM2_MOUSE	Prominin-2 (PROM-2) (Prominin-like protein 2) (mPROML2)	Prom2 Proml2	835	1026.52	14.14	Medium	0.033	0.214	98.1	0.06	24857.9	36	H-2 Db
B22	MHC-DB	High	GQVINLDQL	9		1	3	Q3UVG3	F91A1_MOUSE	Protein FAM91A1	Fam91a1 D15Ertd621e Kiaa0493	837	999.547	46.79	High	0	2.243e-06	49.8	0.04	13635.5	18	H-2 Db
B22	MHC-DB	High	VSPRNPAHF	9		1	1	Q3UVK0	ERMP1_MOUSE	Endoplasmic reticulum metallopeptidase 1 (EC 3.4.-.-) (Felix-ina)	Ermp1 D19Wsu12e Fxna Kiaa1815	898	1024.53	20.18	High	0.001	0.006327	248.1	0.125	539.1	1.1	H-2 Db
Y3	MHC-DB	High	VITNFSARI	9		1	1	Q3UVL4	VPS51_MOUSE	Vacuolar protein sorting-associated protein 51 homolog (Protein fat-free homolog)	Vps51 Ffr	782	1020.58	17.66	High	0	2.48e-10	39624.7	29	31.1	0.09	H-2 Kb
Y3	MHC-DB	High	ICLNNEEPF	9		1	1	Q3UW41	WFDC9_MOUSE	Protein WFDC9	Wfdc9	83	1078.49	11.14	High	0.003	0.003654	2083.2	0.6	4483.5	6	H-2 Db
B22	MHC-DB	High	SSIQNGKYTL	10		1	3	Q3UWM4	KDM7A_MOUSE	Lysine-specific demethylase 7A (EC 1.14.11.-) (JmjC domain-containing histone demethylation protein 1D) (Lysine-specific demethylase 7)	Kdm7a Jhdm1d Kdm7 Kiaa1718	940	1110.58	32.3	High	0	9.803e-05	9.8	0.01	8744	11	H-2 Db
Y3	MHC-DB	High	SNPEFRQL	8		1	4	Q3UWM4	KDM7A_MOUSE	Lysine-specific demethylase 7A (EC 1.14.11.-) (JmjC domain-containing histone demethylation protein 1D) (Lysine-specific demethylase 7)	Kdm7a Jhdm1d Kdm7 Kiaa1718	940	990.5	28.81	High	0.002	0.000932	34141.6	19	17.3	0.05	H-2 Kb
Y3	MHC-DB	High	TNLVPYPRI	9		1	1	Q3UX10	TBAL3_MOUSE	Tubulin alpha chain-like 3	Tubal3	446	1072.61	15.92	High	0.003	0.003654	25594.2	10	121	0.4	H-2 Kb
B22	MHC-DB	Medium	MPAFHETL	8	1xOxidation [M1]	1	1	Q3UY23	FDXA1_MOUSE	Ferredoxin-fold anticodon-binding domain-containing protein 1 homolog (FDX-ACDB domain-containing protein 1)	Fdxacb1	622	961.445	13.95	Medium	0.014	0.1161	15526.5	5	6372.7	8.5	H-2 Db
B22	MHC-DB	High	WQVVAMAAL	9		1	1	Q3UY23	FDXA1_MOUSE	Ferredoxin-fold anticodon-binding domain-containing protein 1 homolog (FDX-ACDB domain-containing protein 1)	Fdxacb1	622	988.529	13.93	High	0.002	0.01193	5986	1.6	1624.5	3	H-2 Db
B22	MHC-DB	High	WAIENPAAF	9		1	1	Q3UZW7	EF2KT_MOUSE	Protein-lysine N-methyltransferase EEF2KMT (EC 2.1.1.-) (eEF2-lysine methyltransferase) (eEF2-KMT)	Eef2kmt Fam86 Fam86a	335	1018.5	14.16	High	0.003	0.03667	85.6	0.06	2283	3.5	H-2 Db
Y3	MHC-DB	Medium	SDSNFSNLIRL	11		1	1	Q3V016	HIPK4_MOUSE	Homeodomain-interacting protein kinase 4 (EC 2.7.11.1)	Hipk4 Gm162	616	1265.65	12.94	Medium	0.015	0.02739	12147.3	3.5	414.7	0.9	H-2 Kb
Y3	MHC-DB	Medium	SDPNKTAI	8		1	1	Q3V0Q1	DYH12_MOUSE	Dynein heavy chain 12, axonemal (Axonemal beta dynein heavy chain 12) (Axonemal dynein heavy chain 12-like protein) (Axonemal dynein heavy chain 7-like protein) (Ciliary dynein heavy chain 12)	Dnah12 Dnah12l Dnah7l Dnahc12 Dnahc7l	3086	845.436	13.1	Medium	0.024	0.1211	26432	11	29446.6	47	H-2 Db
B22	MHC-DB	High	RSPEPLFTYV	10		1	1	Q3V188	ENDOU_MOUSE	Poly(U)-specific endoribonuclease (EC 3.1.-.-) (Placental protein 11-related protein) (PP11-related protein) (Protein endoU) (T-cell-specific protein 30) (Tcl-30) (Uridylate-specific endoribonuclease)	Endou Pp11r	412	1208.63	10.45	High	0.001	0.009171	2015	0.6	4050.5	5.5	H-2 Db
Y3	MHC-DB	High	KSPEYESL	8		1	1	Q3V1L4	5NTC_MOUSE	Cytosolic purine 5'-nucleotidase (EC 3.1.3.5) (Cytosolic 5'-nucleotidase II)	Nt5c2	560	952.462	37.98	High	0	2.54e-12	24278.1	9	99.2	0.3	H-2 Kb
Y3	MHC-DB	Medium	SALEGTRWL	9		1	1	Q3V1L6	MTMRB_MOUSE	Myotubularin-related protein 11	Mtmr11	700	1032.55	10.7	Medium	0.027	0.1211	2163.1	0.7	7300.9	9.5	H-2 Db
B22	MHC-DB	High	AMLENLLSM	9		1	2	Q3V300	KIF22_MOUSE	Kinesin-like protein KIF22	Kif22	660	1021.51	36.11	High	0	0.000173	19	0.015	556.8	1.2	H-2 Db
Y3	MHC-DB	Medium	AVLHYALL	8		1	1	Q3V3Z3	AGRG5_MOUSE	Adhesion G-protein coupled receptor G5 (G-protein coupled receptor 114) (G-protein coupled receptor PGR27)	Adgrg5 Gm1109 Gpr114 Pgr27	523	899.535	14.14	Medium	0.043	0.3518	21656.3	7.5	11	0.03	H-2 Kb
Y3	MHC-DB	High	VNFVFETHDL	10		1	1	Q45VK7	DYHC2_MOUSE	Cytoplasmic dynein 2 heavy chain 1 (Cytoplasmic dynein 2 heavy chain) (Dynein cytoplasmic heavy chain 2) (Dynein heavy chain 11) (mDHC11) (Dynein heavy chain isotype 1B)	Dync2h1 Dhc1b Dnchc2 Kiaa1997	4306	1220.59	34.3	High	0	9.98e-16	14852.4	4.5	22.6	0.07	H-2 Kb
Y3	MHC-DB	High	SSMKKIPEM	9	2xOxidation [M3; M9]	1	3	Q45VK7	DYHC2_MOUSE	Cytoplasmic dynein 2 heavy chain 1 (Cytoplasmic dynein 2 heavy chain) (Dynein cytoplasmic heavy chain 2) (Dynein heavy chain 11) (mDHC11) (Dynein heavy chain isotype 1B)	Dync2h1 Dhc1b Dnchc2 Kiaa1997	4306	1082.52	15.98	High	0.003	0.005872	3150.1	0.9	663.6	1.3	H-2 Db
Y3	MHC-DB	Medium	NMVSHVSSI	9		1	1	Q497L8	S22AG_MOUSE	Solute carrier family 22 member 16 (Carnitine transporter 2) (CT2)	Slc22a16	649	973.477	14.62	Medium	0.03	0.2366	2880.5	0.8	3325.3	5	H-2 Db
B22	MHC-DB	High	FVRINQDYI	9		1	1	Q497V5	SRBD1_MOUSE	S1 RNA-binding domain-containing protein 1	Srbd1	1015	1167.62	19.61	High	0	0.00126	251.6	0.125	7770	10	H-2 Db
B22	MHC-DB	High	SIHGTNPQYL	10		1	1	Q4FK66	PR38A_MOUSE	Pre-mRNA-splicing factor 38A	Prpf38a	312	1129.56	26.98	High	0	0.004735	1153.1	0.4	11461.4	15	H-2 Db
B22	MHC-DB	High	SQNRNGEFV	9		1	1	Q4FK66	PR38A_MOUSE	Pre-mRNA-splicing factor 38A	Prpf38a	312	1050.5	13.24	High	0	0.002247	31.3	0.025	26156.3	39	H-2 Db
B22	MHC-DB	Medium	MLGALYMRL	9		1	1	Q4FK66	PR38A_MOUSE	Pre-mRNA-splicing factor 38A	Prpf38a	312	1067.57	14.8	Medium	0.043	0.2611	34288.2	19	1096.7	1.9	H-2 Kb
B22	MHC-DB	High	SSVRDRDLL	9		1	4	Q4FZC9	SYNE3_MOUSE	Nesprin-3 (Nuclear envelope spectrin repeat protein 3)	Syne3	975	1060.57	16.19	High	0.001	0.006648	288	0.15	7638.9	10	H-2 Db
B22	MHC-DB	High	TSPLGAEKI	9		1	2	Q4FZC9	SYNE3_MOUSE	Nesprin-3 (Nuclear envelope spectrin repeat protein 3)	Syne3	975	915.515	28.14	High	0	0.001655	6003.4	1.6	16203.7	21	H-2 Db
B22	MHC-DB	High	KQIENGVYL	9		1	1	Q4PJX1	ODR4_MOUSE	Protein odr-4 homolog (mODR-4)	Odr4	447	1063.58	14.45	High	0	0.0009471	10.2	0.01	4960.4	7	H-2 Db
B22	MHC-DB	High	RSLESRDHL	9		1	2	Q4QRL3	CC88B_MOUSE	Coiled-coil domain-containing protein 88B (Hook-related protein 3) (HkRP3)	Ccdc88b Ccdc88	1481	1112.58	11.12	High	0	0.0001136	929.7	0.4	3927.7	5.5	H-2 Db
Y3	MHC-DB	High	VSTSFQRV	8		1	1	Q4QY64	ATAD5_MOUSE	ATPase family AAA domain-containing protein 5 (Chromosome fragility-associated gene 1 protein)	Atad5 Frag1	1826	923.495	18.67	High	0.003	0.000932	38155.5	25	17.2	0.05	H-2 Kb
Y3	MHC-DB	Medium	VRYIHVEL	8		1	1	Q4U2R1	HERC2_MOUSE	E3 ubiquitin-protein ligase HERC2 (EC 6.3.2.-) (HECT domain and RCC1-like domain-containing protein 2)	Herc2 Jdf2 Kiaa0393 Rjs	4836	1028.59	15.55	Medium	0.015	0.02739	33920.7	18	120.7	0.4	H-2 Kb
B22	MHC-DB	High	STLRLLTTI	9		1	2	Q4VA53	PDS5B_MOUSE	Sister chromatid cohesion protein PDS5 homolog B (Androgen-induced proliferation inhibitor) (Androgen-induced prostate proliferative shutoff-associated protein AS3)	Pds5b Aprin As3 Kiaa0979	1446	1017.63	33.78	High	0	0.001806	158.1	0.09	682.1	1.4	H-2 Db
B22	MHC-DB	Medium	VSPQAVYTA	9		1	1	Q4VBF2	R3HD4_MOUSE	R3H domain-containing protein 4	R3hdm4	262	935.483	13.14	Medium	0.035	0.2257	7410.4	1.9	12175.5	16	H-2 Db
B22	MHC-DB	High	RQVENVLSL	9		1	3	Q501J2	F173A_MOUSE	Protein FAM173A	Fam173a	229	1057.6	33.59	High	0	7.17e-05	115	0.07	6644.4	8.5	H-2 Db
B22	MHC-DB	High	KLIQLMEEI	9		1	1	Q501J6	DDX17_MOUSE	Probable ATP-dependent RNA helicase DDX17 (EC 3.6.4.13) (DEAD box protein 17)	Ddx17	650	1116.63	17.19	High	0	0.003088	1733.4	0.6	14337.2	19	H-2 Db
Y3	MHC-DB	Medium	IMGFRGTTI	9	1xOxidation [M2]	1	1	Q505D7	OPA3_MOUSE	Optic atrophy 3 protein homolog	Opa3	179	1011.53	16.94	Medium	0.024	0.1211	8102.7	2.5	1036.6	1.9	H-2 Kb
B22	MHC-DB	High	WQVMNVATI	9		1	1	Q505F1	NR2C1_MOUSE	Nuclear receptor subfamily 2 group C member 1 (Orphan nuclear receptor TR2) (Testicular receptor 2) (mTR2)	Nr2c1 Tr2 Tr2-11	590	1061.54	16.57	High	0.003	0.0279	12.1	0.01	5594.9	7.5	H-2 Db
Y3	MHC-DB	High	LTIYDEDVI	9		1	1	Q50L43	PA24D_MOUSE	Cytosolic phospholipase A2 delta (cPLA2-delta) (EC 3.1.1.4) (Phospholipase A2 group IVD)	Pla2g4d	825	1080.55	11.36	High	0.003	0.000956	7221.1	1.9	19053.8	26	H-2 Db
B22	MHC-DB	High	NQGTNVETI	9		1	2	Q52KB6	C2CD3_MOUSE	C2 domain-containing protein 3 (Protein hearty)	C2cd3 Hty	2323	975.474	26.1	High	0.002	0.01446	67.6	0.05	30788.6	50	H-2 Db
B22	MHC-DB	High	KAMENIGEL	9		1	2	Q569Z5	DDX46_MOUSE	Probable ATP-dependent RNA helicase DDX46 (EC 3.6.4.13) (DEAD box protein 46)	Ddx46 Kiaa0801	1032	1004.51	31.72	High	0	2.961e-05	22.7	0.015	1738.5	3	H-2 Db
B22	MHC-DB	High	AALMNLGAIL	10	1xOxidation [M4]	1	2	Q56A06	TMTC2_MOUSE	Transmembrane and TPR repeat-containing protein 2	Tmtc2	836	1002.57	21.3	High	0.002	0.01316	61.7	0.04	4082.4	6	H-2 Db
Y3	MHC-DB	High	IGNTFSQV	8		1	2	Q56A08	GPKOW_MOUSE	G patch domain and KOW motifs-containing protein (Protein MOS2 homolog)	Gpkow	488	865.441	14.57	High	0.003	0.000932	38594.8	26	93.1	0.25	H-2 Kb
B22	MHC-DB	Medium	KANTMVALM	9	1xOxidation [M9]	1	1	Q571B6	WHAMM_MOUSE	WASP homolog-associated protein with actin, membranes and microtubules (WAS protein homology region 2 domain-containing protein 1) (WH2 domain-containing protein 1)	Whamm Kiaa1971 Whdc1	793	994.506	14.4	Medium	0.014	0.1194	1515.5	0.5	1558.8	2.5	H-2 Db
B22	MHC-DB	High	STVENFSQL	9		1	2	Q571H0	NPA1P_MOUSE	Nucleolar pre-ribosomal-associated protein 1 (URB1 ribosome biogenesis 1 homolog)	Urb1 Kiaa0539 Npa1	2274	1024.49	32.69	High	0	0.001855	158.8	0.09	48.6	0.15	H-2 Db
Y3	MHC-DB	High	SIWQFFSRL	9		1	2	Q58A65	JIP4_MOUSE	C-Jun-amino-terminal kinase-interacting protein 4 (JIP-4) (JNK-interacting protein 4) (JNK-associated leucine-zipper protein) (JLP) (JNK/SAPK-associated protein 2) (JSAP2) (Mitogen-activated protein kinase 8-interacting protein 4) (Sperm-associated antigen 9)	Spag9 Jip4 Jsap2 Kiaa0516 Mapk8ip4	1321	1183.63	24.54	High	0	9.98e-16	7122.1	1.8	3.5	0.01	H-2 Kb
Y3	MHC-DB	High	TTYKYFAL	8		1	3	Q5BLK4	TUT7_MOUSE	Terminal uridylyltransferase 7 (TUTase 7) (EC 2.7.7.52) (Zinc finger CCHC domain-containing protein 6)	Zcchc6 Kiaa1711 Tut7	1491	1006.52	20.14	High	0	2.72e-11	22673.9	8	2.7	0.01	H-2 Kb
B22	MHC-DB	High	SSSLNQEKI	9		1	3	Q5DTT3	F208B_MOUSE	Protein FAM208B (Peripheral benzodiazepine receptor-associated protein 20)	Fam208b Kiaa2006 Pap20	2382	1005.52	30.49	High	0	5.749e-05	413.8	0.2	12407.6	16	H-2 Db
B22	MHC-DB	High	FAVVNHQGTL	10		1	4	Q5DU02	UBP22_MOUSE	Ubiquitin carboxyl-terminal hydrolase 22 (EC 3.4.19.12) (Deubiquitinating enzyme 22) (Ubiquitin thioesterase 22) (Ubiquitin-specific-processing protease 22)	Usp22 Kiaa1063	525	1085.57	46.51	High	0	1.249e-05	9.5	0.01	5343	7	H-2 Db
B22	MHC-DB	High	GALSNLEQL	9		1	1	Q5DU41	LRC8B_MOUSE	Volume-regulated anion channel subunit LRRC8B (Leucine-rich repeat-containing protein 8B) (T-cell activation leucine repeat-rich protein) (TA-LRRP)	Lrrc8b Kiaa0231	803	944.505	17.2	High	0	0.0009907	13.5	0.01	4582.8	6.5	H-2 Db
Y3	MHC-DB	High	KTTFFRNL	8		1	2	Q5EBH1	RASF5_MOUSE	Ras association domain-containing protein 5 (New ras effector 1) (Regulator for cell adhesion and polarization enriched in lymphoid tissues) (RAPL)	Rassf5 Nore1 Rapl	413	1026.57	24.09	High	0.003	0.003665	38758	27	27.2	0.08	H-2 Kb
B22	MHC-DB	High	WKVVNPYYL	9		1	4	Q5EG47	AAPK1_MOUSE	5'-AMP-activated protein kinase catalytic subunit alpha-1 (AMPK subunit alpha-1) (EC 2.7.11.1) (Acetyl-CoA carboxylase kinase) (ACACA kinase) (EC 2.7.11.27) (Hydroxymethylglutaryl-CoA reductase kinase) (HMGCR kinase) (EC 2.7.11.31) (Tau-protein kinase PRKAA1) (EC 2.7.11.26)	Prkaa1	559	1181.64	35.29	High	0	1.312e-05	121.8	0.08	10703.3	14	H-2 Db
Y3	MHC-DB	High	WKVVNPYYL	9		1	2	Q5EG47	AAPK1_MOUSE	5'-AMP-activated protein kinase catalytic subunit alpha-1 (AMPK subunit alpha-1) (EC 2.7.11.1) (Acetyl-CoA carboxylase kinase) (ACACA kinase) (EC 2.7.11.27) (Hydroxymethylglutaryl-CoA reductase kinase) (HMGCR kinase) (EC 2.7.11.31) (Tau-protein kinase PRKAA1) (EC 2.7.11.26)	Prkaa1	559	1181.64	15.36	High	0	9.98e-16	121.8	0.08	10703.3	14	H-2 Db
B22	MHC-DB	High	SQISNGSHM	9	1xOxidation [M9]	1	2	Q5F2E8	TAOK1_MOUSE	Serine/threonine-protein kinase TAO1 (EC 2.7.11.1) (Thousand and one amino acid protein 1)	Taok1 Kiaa1361	1001	976.415	17.44	High	0	0.00187	8.9	0.01	3426.7	5	H-2 Db
B22	MHC-DB	High	SALRLLEAL	9		1	2	Q5GH66	XKR5_MOUSE	XK-related protein 5	Xkr5 Xrg5	676	985.604	55	High	0	8.48e-08	95.1	0.06	264.4	0.7	H-2 Db
B22	MHC-DB	High	FSFKMISYM	9		1	1	Q5H8C4	VP13A_MOUSE	Vacuolar protein sorting-associated protein 13A (Chorea-acanthocytosis protein homolog) (Chorein)	Vps13a Chac Kiaa0986	3166	1153.54	10.8	High	0.002	0.01545	122.4	0.08	95.2	0.3	H-2 Db
B22	MHC-DB	Medium	INPLNETVA	9		1	3	Q5H8C4	VP13A_MOUSE	Vacuolar protein sorting-associated protein 13A (Chorea-acanthocytosis protein homolog) (Chorein)	Vps13a Chac Kiaa0986	3166	970.52	11.62	Medium	0.025	0.1766	3852.6	1	11267.1	15	H-2 Db
Y3	MHC-DB	High	VSIQFYHL	8		1	4	Q5H8C4	VP13A_MOUSE	Vacuolar protein sorting-associated protein 13A (Chorea-acanthocytosis protein homolog) (Chorein)	Vps13a Chac Kiaa0986	3166	1006.54	34.11	High	0	0.000932	2819.6	0.8	2.5	0.01	H-2 Kb
Y3	MHC-DB	Medium	SGREFVNL	8		1	1	Q5HZH2	TSR3_MOUSE	Ribosome biogenesis protein TSR3 homolog	Tsr3	323	921.479	11.65	Medium	0.016	0.05937	39805.1	29	10.1	0.03	H-2 Kb
B22	MHC-DB	High	IMQLVATEYL	10		1	1	Q5HZJ0	RNC_MOUSE	Ribonuclease 3 (EC 3.1.26.3) (Protein Drosha) (Ribonuclease III) (RNase III)	Drosha Etohi2 Rn3 Rnasen	1373	1180.63	23.73	High	0	0.0001624	2360.3	0.7	5940.9	8	H-2 Db
Y3	MHC-DB	High	IGVIFTHV	8		1	2	Q5HZJ0	RNC_MOUSE	Ribonuclease 3 (EC 3.1.26.3) (Protein Drosha) (Ribonuclease III) (RNase III)	Drosha Etohi2 Rn3 Rnasen	1373	885.519	30.99	High	0.003	0.001796	25288.1	10	15.5	0.05	H-2 Kb
Y3	MHC-DB	High	VIISFNSL	8		1	2	Q5I012	S38AA_MOUSE	Putative sodium-coupled neutral amino acid transporter 10 (Solute carrier family 38 member 10)	Slc38a10	1090	892.514	40.32	High	0	3.73e-15	21363.3	7.5	4.7	0.01	H-2 Kb
Y3	MHC-DB	Medium	LQYLFALL	8		1	1	Q5I043	UBP28_MOUSE	Ubiquitin carboxyl-terminal hydrolase 28 (EC 3.4.19.12) (Deubiquitinating enzyme 28) (Ubiquitin thioesterase 28) (Ubiquitin-specific-processing protease 28)	Usp28 Kiaa1515	1051	980.582	10.52	Medium	0.037	0.3489	11827.4	3.5	3.3	0.01	H-2 Kb
Y3	MHC-DB	High	IGLAYVNHL	9		1	1	Q5KU39	VPS41_MOUSE	Vacuolar protein sorting-associated protein 41 homolog (VAM2 homolog) (mVAM2)	Vps41	853	999.562	31.01	High	0	0.000932	14180.3	4.5	20.1	0.06	H-2 Kb
Y3	MHC-DB	High	YQYSFPEL	8		1	3	Q5M8N4	D39U1_MOUSE	Epimerase family protein SDR39U1 (EC 1.1.1.-) (Short-chain dehydrogenase/reductase family 39U member 1)	Sdr39u1	308	1046.48	41.39	High	0	9.98e-16	4969.1	1.3	15.1	0.05	H-2 Kb
Y3	MHC-DB	High	LILDYRNL	8		1	1	Q5NCE8	MRS2_MOUSE	Magnesium transporter MRS2 homolog, mitochondrial (MRS2-like protein)	Mrs2 Gm902 Mrs2l	434	1019.59	20.18	High	0	6.04e-07	40965.6	32	15	0.05	H-2 Kb
Y3	MHC-DB	High	QSIIFINL	8		1	1	Q5NCE8	MRS2_MOUSE	Magnesium transporter MRS2 homolog, mitochondrial (MRS2-like protein)	Mrs2 Gm902 Mrs2l	434	947.556	13.67	High	0	7.27e-07	23744.3	9	5.7	0.015	H-2 Kb
Y3	MHC-DB	High	ANYQVGRL	8		1	2	Q5NCY3	CB5D1_MOUSE	Cytochrome b5 domain-containing protein 1	Cyb5d1 Gm740	228	920.495	29.29	High	0.003	0.01279	32637.2	17	35.2	0.125	H-2 Kb
Y3	MHC-DB	High	IGPRYSSV	8		1	5	Q5PRF0	HTR5A_MOUSE	HEAT repeat-containing protein 5A	Heatr5a Kiaa1316	2038	878.473	30.18	High	0.003	0.002622	36908.5	23	19.4	0.06	H-2 Kb
B22	MHC-DB	High	VMMTVYSKI	9	1xOxidation [M3]	1	1	Q5QD12	TAA7A_MOUSE	Trace amine-associated receptor 7a (TaR-7a) (Trace amine receptor 7a) (mTaar7a)	Taar7a Gm229	358	1087.55	16.75	High	0.003	0.03045	6013.7	1.6	109.6	0.3	H-2 Kb
B22	MHC-DB	Medium	MTMLGNMAVII	11	3xOxidation [M1; M3; M7]	1	1	Q5QD15	TAAR4_MOUSE	Trace amine-associated receptor 4 (TaR-4) (Trace amine receptor 4) (mTaar4) (2-phenylethylamine receptor)	Taar4 Gm226	347	1241.59	14.61	Medium	0.014	0.1184	1869.5	0.6	14876.6	19	H-2 Db
Y3	MHC-DB	High	SGFYYKTRI	9		1	2	Q5RJG1	NOL10_MOUSE	Nucleolar protein 10	Nol10 Gm67	687	1134.59	19.98	High	0.003	0.000932	20423.5	7	34.5	0.1	H-2 Kb
B22	MHC-DB	High	VTVINLFQL	9		1	2	Q5RJH6	SMG7_MOUSE	Protein SMG7 (EST1-like protein C) (SMG-7 homolog)	Smg7 Est1c Kiaa0250	1138	1046.62	20.76	High	0	0.001369	265.8	0.125	221.8	0.6	H-2 Db
B22	MHC-DB	High	YGPENTLPTL	10		1	2	Q5RJY2	G2E3_MOUSE	G2/M phase-specific E3 ubiquitin-protein ligase (EC 6.3.2.-)	G2e3 Kiaa1333	716	1104.56	38.56	High	0	0.000131	43.5	0.03	16652.1	22	H-2 Db
B22	MHC-DB	High	FSFSNDFTI	9		1	2	Q5S006	LRRK2_MOUSE	Leucine-rich repeat serine/threonine-protein kinase 2 (EC 2.7.11.1)	Lrrk2	2527	1077.49	12.01	High	0	0.004911	7	0.01	643.2	1.3	H-2 Db
B22	MHC-DB	High	ATLINNTWL	9		1	1	Q5S248	TM11E_MOUSE	Transmembrane protease serine 11E (EC 3.4.21.-) (Serine protease DESC1) [Cleaved into: Transmembrane protease serine 11E non-catalytic chain; Transmembrane protease serine 11E catalytic chain]	Tmprss11e Desc1	423	1045.57	24.7	High	0	0.0001004	32.8	0.025	6080.9	8	H-2 Db
B22	MHC-DB	Medium	LSINGFAYF	9		1	1	Q5SDA5	GUC2F_MOUSE	Retinal guanylyl cyclase 2 (EC 4.6.1.2)	Gucy2f	1108	1031.52	10.46	Medium	0.033	0.2145	5191.2	1.4	163.4	0.5	H-2 Kb
B22	MHC-DB	High	THLLNSEHL	9		1	1	Q5SPL2	PHF12_MOUSE	PHD finger protein 12 (PHD factor 1) (Pf1)	Phf12 Kiaa1523	1003	1063.55	32.15	High	0	6.809e-05	1657.5	0.5	2493.7	4	H-2 Db
B22	MHC-DB	High	AAIRDGELI	9		1	1	Q5SPL2	PHF12_MOUSE	PHD finger protein 12 (PHD factor 1) (Pf1)	Phf12 Kiaa1523	1003	957.536	17.77	High	0.002	0.01966	96.9	0.06	19035.7	26	H-2 Db
B22	MHC-DB	High	YQILNNEVF	9		1	2	Q5SQX6	CYFP2_MOUSE	Cytoplasmic FMR1-interacting protein 2 (p53-inducible protein 121)	Cyfip2 Kiaa1168 Pir121	1253	1139.57	31.88	High	0	4.73e-07	28.1	0.02	14817.9	19	H-2 Db
Y3	MHC-DB	High	QSFFFTHL	8		1	2	Q5SQX6	CYFP2_MOUSE	Cytoplasmic FMR1-interacting protein 2 (p53-inducible protein 121)	Cyfip2 Kiaa1168 Pir121	1253	1026.5	28.77	High	0.002	0.000932	9491.3	2.5	3.1	0.01	H-2 Kb
B22	MHC-DB	Medium	LMQQNSFL	8	1xOxidation [M2]	1	1	Q5SSE9	ABCAD_MOUSE	ATP-binding cassette sub-family A member 13	Abca13	5034	996.482	14.09	Medium	0.041	0.2459	4026.7	1.1	10122.6	13	H-2 Db
B22	MHC-DB	High	FSVLNWDQV	9		1	3	Q5SSF7	FA46C_MOUSE	Protein FAM46C	Fam46c	391	1107.55	43.73	High	0	0.0001096	6.2	0.01	931.2	1.7	H-2 Db
Y3	MHC-DB	High	KIWEWLVGV	9		1	3	Q5SSH7	ZZEF1_MOUSE	Zinc finger ZZ-type and EF-hand domain-containing protein 1	Zzef1 Kiaa0399	2924	1129.64	27.12	High	0.003	0.003654	37126	23	556.6	1.2	H-2 Kb
B22	MHC-DB	High	AASKNGQYV	9		1	2	Q5SSI6	UTP18_MOUSE	U3 small nucleolar RNA-associated protein 18 homolog (WD repeat-containing protein 50)	Utp18 Wdr50	552	937.474	35.02	High	0	0.005213	223.3	0.125	17133	23	H-2 Db
B22	MHC-DB	High	VTGNFPEPL	9		1	1	Q5SUE7	ADAD1_MOUSE	Adenosine deaminase domain-containing protein 1 (Testis nuclear RNA-binding protein)	Adad1 Tenr	619	973.499	18.67	High	0.003	0.03682	13871.3	4	156.3	0.4	H-2 Kb
Y3	MHC-DB	Medium	LMWLFGCPL	9	1xOxidation [M2]	1	1	Q5SUR0	PUR4_MOUSE	Phosphoribosylformylglycinamidine synthase (FGAM synthase) (FGAMS) (EC 6.3.5.3) (Formylglycinamide ribonucleotide amidotransferase) (FGAR amidotransferase) (FGAR-AT) (Formylglycinamide ribotide amidotransferase)	Pfas Kiaa0361	1337	1095.54	10.79	Medium	0.015	0.02739	1773.6	0.6	103	0.3	H-2 Kb
Y3	MHC-DB	High	VSYEKFSNL	9		1	2	Q5SVR0	TBC9B_MOUSE	TBC1 domain family member 9B	Tbc1d9b Kiaa0676	1263	1086.55	40.69	High	0	9.98e-16	5958.2	1.5	2.5	0.01	H-2 Kb
B22	MHC-DB	High	VAVSNLEKV	9		1	2	Q5SVT3	ETAA1_MOUSE	Ewing's tumor-associated antigen 1 homolog	Etaa1	877	958.557	47.8	High	0	6.667e-06	14.2	0.01	1632.1	3	H-2 Db
Y3	MHC-DB	High	QGYEYDNL	8		1	1	Q5SW45	MKS1_MOUSE	Meckel syndrome type 1 protein homolog	Mks1	561	1001.42	11.69	High	0.003	0.005423	32759.3	17	12.6	0.04	H-2 Kb
Y3	MHC-DB	High	RIFQFQNF	8		1	3	Q5SWD9	TSR1_MOUSE	Pre-rRNA-processing protein TSR1 homolog	Tsr1 Kiaa1401	803	1099.57	32.18	High	0	2.51e-14	27172.9	12	17.7	0.05	H-2 Kb
Y3	MHC-DB	High	RAYLFAHV	8		1	4	Q5SWD9	TSR1_MOUSE	Pre-rRNA-processing protein TSR1 homolog	Tsr1 Kiaa1401	803	976.536	26.93	High	0	0.000932	13181.6	4	2.5	0.01	H-2 Kb
B22	MHC-DB	High	VSLRNSISNFL	11		1	3	Q5SWU9	ACACA_MOUSE	Acetyl-CoA carboxylase 1 (ACC1) (EC 6.4.1.2) (ACC-alpha) (Acetyl-CoA carboxylase 265) [Includes: Biotin carboxylase (EC 6.3.4.14)]	Acaca Acac Gm738	2345	1249.69	31.39	High	0	5.623e-06	205.3	0.125	3328.4	5	H-2 Db
B22	MHC-DB	High	SLIKLWESM	9		1	1	Q5SWU9	ACACA_MOUSE	Acetyl-CoA carboxylase 1 (ACC1) (EC 6.4.1.2) (ACC-alpha) (Acetyl-CoA carboxylase 265) [Includes: Biotin carboxylase (EC 6.3.4.14)]	Acaca Acac Gm738	2345	1106.59	25.7	High	0	0.0002101	3380.4	0.9	2148.7	3.5	H-2 Db
Y3	MHC-DB	High	SQVRFSNI	8		1	1	Q5SWW4	MED13_MOUSE	Mediator of RNA polymerase II transcription subunit 13 (Thyroid hormone receptor-associated protein 1) (Thyroid hormone receptor-associated protein complex 240 kDa component) (Trap240)	Med13 Kiaa0593 Thrap1 Trap240	2171	950.505	23.02	High	0.005	0.02739	18513.6	6	31.6	0.09	H-2 Kb
B22	MHC-DB	High	SGHSNHIAL	9		1	1	Q5SX19	PIGL_MOUSE	N-acetylglucosaminyl-phosphatidylinositol de-N-acetylase (EC 3.5.1.89) (Phosphatidylinositol-glycan biosynthesis class L protein) (PIG-L)	Pigl Gm737	252	935.469	20.76	High	0.001	0.005872	68	0.05	439	1	H-2 Db
Y3	MHC-DB	High	TIFNFIITV	9		1	4	Q5SYH2	TM199_MOUSE	Transmembrane protein 199	Tmem199	208	1067.61	40.63	High	0	1.95e-12	19922.8	6.5	68	0.2	H-2 Kb
Y3	MHC-DB	High	SQYVFTEM	8		1	3	Q5SYH2	TM199_MOUSE	Transmembrane protein 199	Tmem199	208	1004.44	45.44	High	0	9.98e-16	3636.3	1	7.8	0.02	H-2 Kb
Y3	MHC-DB	High	ISLDYQHL	8		1	1	Q5SYL3	K0100_MOUSE	Protein KIAA0100	Kiaa0100	2234	988.51	28.85	High	0	0.0001843	18085.8	6	4.4	0.01	H-2 Kb
B22	MHC-DB	High	SGLTMITHL	9		1	1	Q5U4C1	GASP1_MOUSE	G-protein coupled receptor-associated sorting protein 1 (GASP-1)	Gprasp1 Kiaa0443	1347	972.518	24.63	High	0	0.003462	508.1	0.25	168	0.5	H-2 Db
B22	MHC-DB	High	RAPEGDDFL	9		1	5	Q5U4C3	SFR19_MOUSE	Splicing factor, arginine/serine-rich 19 (SR-related and CTD-associated factor 1)	Scaf1 Sfrs19	1256	1019.48	23.55	High	0.002	0.0248	661.4	0.3	23643.8	34	H-2 Db
Y3	MHC-DB	High	VAYRYEVL	8		1	3	Q5U4C9	DYRK2_MOUSE	Dual specificity tyrosine-phosphorylation-regulated kinase 2 (EC 2.7.12.1)	Dyrk2	599	1012.55	25.31	High	0	6.79e-12	5049.9	1.3	3.4	0.01	H-2 Kb
B22	MHC-DB	Medium	AVLSCYAVF	9		1	1	Q5U4D8	SC5A6_MOUSE	Sodium-dependent multivitamin transporter (Na(+)-dependent multivitamin transporter) (Solute carrier family 5 member 6)	Slc5a6	634	972.486	14.35	Medium	0.018	0.1402	12121.5	3.5	402.1	0.9	H-2 Kb
Y3	MHC-DB	High	TNYKFFML	8		1	3	Q5Y5T1	ZDH20_MOUSE	Probable palmitoyltransferase ZDHHC20 (EC 2.3.1.225) (Zinc finger DHHC domain-containing protein 20) (DHHC-20)	Zdhhc20	380	1063.53	44.24	High	0	8.48e-13	21968.8	8	2.9	0.01	H-2 Kb
Y3	MHC-DB	Medium	VMINGQTVKL	10		1	1	Q5Y5T2	ZDH18_MOUSE	Palmitoyltransferase ZDHHC18 (EC 2.3.1.225) (Zinc finger DHHC domain-containing protein 18) (DHHC-18)	Zdhhc18	380	1102.63	12.09	Medium	0.023	0.09212	4004.2	1.1	2359.4	3.5	H-2 Db
B22	MHC-DB	High	LSFTCVWYSVI	11		1	1	Q5Y5T3	ZDH23_MOUSE	Palmitoyltransferase ZDHHC23 (EC 2.3.1.225) (DHHC-containing protein 11) (Zinc finger DHHC domain-containing protein 23) (DHHC-23) (zDHHC23)	Zdhhc23 Gm779	425	1317.65	10.91	High	0.001	0.0114	7207.7	1.9	1029.7	1.8	H-2 Kb
B22	MHC-DB	High	LVIFNQEVI	9		1	1	Q60520	SIN3A_MOUSE	Paired amphipathic helix protein Sin3a (Histone deacetylase complex subunit Sin3a) (Transcriptional corepressor Sin3a)	Sin3a Kiaa4126	1274	1074.62	42.37	High	0	7.297e-05	121.4	0.08	6608.1	8.5	H-2 Db
B22	MHC-DB	High	NALMLQLEL	9	1xOxidation [M4]	1	1	Q60700	M3K12_MOUSE	Mitogen-activated protein kinase kinase kinase 12 (EC 2.7.11.25) (Dual leucine zipper bearing kinase) (DLK) (Leucine-zipper protein kinase) (ZPK) (MAPK-upstream kinase) (MUK) (Mixed lineage kinase)	Map3k12 Zpk	888	1060.57	14.13	High	0.001	0.01049	1357.8	0.5	4513.2	6.5	H-2 Db
B22	MHC-DB	Medium	SKAANPKDPV	10		1	1	Q60775	ELF1_MOUSE	ETS-related transcription factor Elf-1 (E74-like factor 1)	Elf1	612	1026.56	13.1	Medium	0.027	0.1812	3458	0.9	22322.7	31	H-2 Db
B22	MHC-DB	High	QELANEVVI	9		1	1	Q60779	GAS8_MOUSE	Growth arrest-specific protein 8 (GAS-8) (Growth arrest-specific protein 11) (GAS-11)	Gas8 Gas11	478	1014.55	19.37	High	0.002	0.02123	3046.9	0.8	22131.5	31	H-2 Db
Y3	MHC-DB	High	SNYHFYSSI	9		1	4	Q60795	NF2L2_MOUSE	Nuclear factor erythroid 2-related factor 2 (NF-E2-related factor 2) (NFE2-related factor 2) (Nuclear factor, erythroid derived 2, like 2)	Nfe2l2 Nrf-2 Nrf2	597	1117.49	31.16	High	0	8.96e-09	6276.5	1.6	3.9	0.01	H-2 Kb
Y3	MHC-DB	Medium	YNVPLEARM	9		1	1	Q60841	RELN_MOUSE	Reelin (EC 3.4.21.-) (Reeler protein)	Reln Rl	3461	1092.55	10.07	Medium	0.046	0.3802	24740	9.5	1138.6	2	H-2 Kb
Y3	MHC-DB	High	RNFIFSRL	8		1	6	Q60848	HELLS_MOUSE	Lymphocyte-specific helicase (EC 3.6.4.-) (Proliferation-associated SNF2-like protein)	Hells Lsh Pasg	821	1052.6	27.01	High	0	3.835e-05	31681.8	16	2.9	0.01	H-2 Kb
Y3	MHC-DB	High	KVLVFSQM	8		1	4	Q60848	HELLS_MOUSE	Lymphocyte-specific helicase (EC 3.6.4.-) (Proliferation-associated SNF2-like protein)	Hells Lsh Pasg	821	951.533	52.11	High	0	7.783e-05	23235.7	8.5	31.7	0.09	H-2 Kb
Y3	MHC-DB	High	KVLVFSQM	8	1xOxidation [M8]	1	3	Q60848	HELLS_MOUSE	Lymphocyte-specific helicase (EC 3.6.4.-) (Proliferation-associated SNF2-like protein)	Hells Lsh Pasg	821	967.528	51.54	High	0	9.98e-16	23235.7	8.5	31.7	0.09	H-2 Kb
B22	MHC-DB	High	FMNPFNLPNL	10		1	2	Q60864	STIP1_MOUSE	Stress-induced-phosphoprotein 1 (STI1) (mSTI1) (Hsc70/Hsp90-organizing protein) (Hop)	Stip1	543	1206.6	12.24	High	0	3.668e-05	344.4	0.175	1216.6	2.5	H-2 Db
Y3	MHC-DB	Medium	VIDKKLRNL	9		1	1	Q60865	CAPR1_MOUSE	Caprin-1 (Cytoplasmic activation- and proliferation-associated protein 1) (GPI-anchored membrane protein 1) (GPI-anchored protein p137) (GPI-p137) (p137GPI) (Membrane component chromosome 11 surface marker 1) (RNA granule protein 105)	Caprin1 Gpiap Gpiap1 Gpip137 M11s1 Rng105 G5E5	707	1098.7	11.36	Medium	0.012	0.02739	43939.9	44	658.1	1.3	H-2 Kb
Y3	MHC-DB	High	VNRSFIAL	8		1	2	Q60870	REEP5_MOUSE	Receptor expression-enhancing protein 5 (GP106) (Polyposis locus protein 1 homolog) (Protein TB2 homolog)	Reep5 Dp1	185	919.536	22.19	High	0.003	0.003654	29196.9	13	7.6	0.02	H-2 Kb
Y3	MHC-DB	Medium	LAYTANSPL	9		1	1	Q60935	NAR1_MOUSE	GPI-linked NAD(P)(+)--arginine ADP-ribosyltransferase 1 (EC 2.4.2.31) (ADP-ribosyltransferase C2 and C3 toxin-like 1) (ARTC1) (Mono(ADP-ribosyl)transferase 1) (YAC-1) (CD antigen CD296)	Art1 Art2	325	949.499	12.27	Medium	0.019	0.09212	2927.7	0.8	126.1	0.4	H-2 Kb
Y3	MHC-DB	Medium	MGIRAPGPM	9	1xOxidation [M9]	1	1	Q60954	MEIS1_MOUSE	Homeobox protein Meis1 (Myeloid ecotropic viral integration site 1)	Meis1	390	945.465	22.83	Medium	0.034	0.3489	6760.4	1.8	3571.5	5	H-2 Db
B22	MHC-DB	High	SALQSLLHL	9		1	3	Q60960	IMA5_MOUSE	Importin subunit alpha-5 (Importin alpha-S1) (Karyopherin subunit alpha-1) (Nucleoprotein interactor 1) (NPI-1) (RAG cohort protein 2) (SRP1-beta) [Cleaved into: Importin subunit alpha-5, N-terminally processed]	Kpna1 Rch2	538	981.573	25.23	High	0	0.001858	252.9	0.125	309.7	0.8	H-2 Db
B22	MHC-DB	High	NDAIVNVARA	10		1	1	Q60976	JERKY_MOUSE	Jerky protein	Jrk	557	1042.56	14.8	High	0.009	0.07483	4928.6	1.3	29976.7	48	H-2 Db
Y3	MHC-DB	High	SAISLRNL	8		1	1	Q60988	STIL_MOUSE	SCL-interrupting locus protein homolog	Stil Sil	1262	873.515	35.31	High	0	9.98e-16	10355.2	3	54.3	0.175	H-2 Kb
B22	MHC-DB	High	TSSVNKEQL	9		1	1	Q60989	XIAP_MOUSE	E3 ubiquitin-protein ligase XIAP (EC 6.3.2.-) (Baculoviral IAP repeat-containing protein 4) (IAP homolog A) (Inhibitor of apoptosis protein 3) (IAP-3) (mIAP-3) (mIAP3) (X-linked inhibitor of apoptosis protein) (X-linked IAP)	Xiap Aipa Api3 Birc4 Miha	496	1005.52	16.32	High	0	0.000888	2660.3	0.8	9645	13	H-2 Db
Y3	MHC-DB	High	FAATLLLSAL	10		1	1	Q60991	CP7B1_MOUSE	25-hydroxycholesterol 7-alpha-hydroxylase (EC 1.14.13.100) (Cytochrome P450 7B1) (Hippocampal transcript 1 protein) (HCT-1) (Oxysterol 7-alpha-hydroxylase)	Cyp7b1	507	1019.61	34.87	High	0.003	0.000932	2351.5	0.7	5671.7	7.5	H-2 Db
Y3	MHC-DB	High	RNLSFVARQM	10		1	4	Q61037	TSC2_MOUSE	Tuberin (Tuberous sclerosis 2 protein homolog)	Tsc2	1814	1221.65	24.01	High	0	3.682e-06	28527.1	13	363.9	0.9	H-2 Kb
Y3	MHC-DB	High	LFYVQQANL	9		1	2	Q61068	U17PA_MOUSE	Ubiquitin carboxyl-terminal hydrolase 17-like protein A (USP17-A) (EC 3.4.19.12) (Deubiquitinating enzyme 1) (Ubiquitin carboxyl-terminal hydrolase DUB-1) (Ubiquitin thioesterase DUB-1) (Ubiquitin-specific-processing protease DUB-1)	Usp17la Dub-1 Dub1	526	1095.58	19.01	High	0	0.000652	29571.1	14	54.9	0.175	H-2 Kb
B22	MHC-DB	High	NMPWNVDTL	9		1	6	Q61081	CDC37_MOUSE	Hsp90 co-chaperone Cdc37 (Hsp90 chaperone protein kinase-targeting subunit) (p50Cdc37) [Cleaved into: Hsp90 co-chaperone Cdc37, N-terminally processed]	Cdc37	379	1089.5	33.73	High	0	0.0001381	13.7	0.01	8988.9	12	H-2 Db
B22	MHC-DB	High	NMPWNVDTL	9	1xOxidation [M2]	1	3	Q61081	CDC37_MOUSE	Hsp90 co-chaperone Cdc37 (Hsp90 chaperone protein kinase-targeting subunit) (p50Cdc37) [Cleaved into: Hsp90 co-chaperone Cdc37, N-terminally processed]	Cdc37	379	1105.5	29.99	High	0	3.503e-05	13.7	0.01	8988.9	12	H-2 Db
Y3	MHC-DB	High	NMPWNVDTL	9		1	2	Q61081	CDC37_MOUSE	Hsp90 co-chaperone Cdc37 (Hsp90 chaperone protein kinase-targeting subunit) (p50Cdc37) [Cleaved into: Hsp90 co-chaperone Cdc37, N-terminally processed]	Cdc37	379	1089.5	26.31	High	0	6.417e-05	13.7	0.01	8988.9	12	H-2 Db
Y3	MHC-DB	High	LSFARYFI	8		1	2	Q61086	FZD3_MOUSE	Frizzled-3 (Fz-3) (mFz3)	Fzd3	666	1016.56	16.2	High	0.003	0.003443	8021.7	2.5	215.5	0.6	H-2 Kb
B22	MHC-DB	High	ASLKSTSTL	9		1	1	Q61102	ABCB7_MOUSE	ATP-binding cassette sub-family B member 7, mitochondrial (ATP-binding cassette transporter 7) (ABC transporter 7 protein)	Abcb7 Abc7	752	907.51	24.09	High	0	0.0008824	535.3	0.25	1368	2.5	H-2 Db
Y3	MHC-DB	High	KTYETASL	8		1	1	Q61102	ABCB7_MOUSE	ATP-binding cassette sub-family B member 7, mitochondrial (ATP-binding cassette transporter 7) (ABC transporter 7 protein)	Abcb7 Abc7	752	912.467	13.31	High	0.003	0.003695	33136.1	17	40.8	0.125	H-2 Kb
Y3	MHC-DB	High	SALVFNLL	8		1	2	Q61102	ABCB7_MOUSE	ATP-binding cassette sub-family B member 7, mitochondrial (ATP-binding cassette transporter 7) (ABC transporter 7 protein)	Abcb7 Abc7	752	876.519	25.6	High	0.002	0.000932	7993.6	2.5	7.2	0.02	H-2 Kb
B22	MHC-DB	High	EAIKNHEEL	9		1	2	Q61112	CAB45_MOUSE	45 kDa calcium-binding protein (Cab45) (Stromal cell-derived factor 4) (SDF-4)	Sdf4 Cab45	361	1082.55	28.92	High	0	0.0001912	148	0.09	10429.4	13	H-2 Db
Y3	MHC-DB	High	VIFDFMDTL	9		1	1	Q61151	2A5E_MOUSE	Serine/threonine-protein phosphatase 2A 56 kDa regulatory subunit epsilon isoform (PP2A B subunit isoform B'-epsilon) (PP2A B subunit isoform B56-epsilon) (PP2A B subunit isoform PR61-epsilon) (PP2A B subunit isoform R5-epsilon)	Ppp2r5e Kiaa4006	467	1100.53	17.14	High	0	9.98e-16	8935.3	2.5	17.7	0.05	H-2 Kb
Y3	MHC-DB	High	VIFDFMDTL	9	1xOxidation [M6]	1	1	Q61151	2A5E_MOUSE	Serine/threonine-protein phosphatase 2A 56 kDa regulatory subunit epsilon isoform (PP2A B subunit isoform B'-epsilon) (PP2A B subunit isoform B56-epsilon) (PP2A B subunit isoform PR61-epsilon) (PP2A B subunit isoform R5-epsilon)	Ppp2r5e Kiaa4006	467	1116.53	16.69	High	0	9.98e-16	8935.3	2.5	17.7	0.05	H-2 Kb
Y3	MHC-DB	High	RIYGKFLGL	9		1	4	Q61151	2A5E_MOUSE	Serine/threonine-protein phosphatase 2A 56 kDa regulatory subunit epsilon isoform (PP2A B subunit isoform B'-epsilon) (PP2A B subunit isoform B56-epsilon) (PP2A B subunit isoform PR61-epsilon) (PP2A B subunit isoform R5-epsilon)	Ppp2r5e Kiaa4006	467	1066.64	36.92	High	0	1.08e-09	34028.4	19	19.2	0.06	H-2 Kb
Y3	MHC-DB	High	TSPHYQNL	8		1	4	Q61152	PTN18_MOUSE	Tyrosine-protein phosphatase non-receptor type 18 (EC 3.1.3.48) (Fetal liver phosphatase 1) (FLP-1) (PTP-K1)	Ptpn18 Flp1 Ptpk1	453	959.458	24.86	High	0	2.138e-06	30702.8	15	13.1	0.04	H-2 Kb
Y3	MHC-DB	High	SVLLFIEHV	9		1	2	Q61168	LAPM5_MOUSE	Lysosomal-associated transmembrane protein 5 (Lysosomal-associated multitransmembrane protein 5) (Retinoic acid-inducible E3 protein)	Laptm5	261	1056.61	34.12	High	0.003	0.000932	8590.2	2.5	103.5	0.3	H-2 Kb
B22	MHC-DB	High	SQVINPTAITV	11		1	2	Q61191	HCFC1_MOUSE	Host cell factor 1 (HCF) (HCF-1) (C1 factor) [Cleaved into: HCF N-terminal chain 1; HCF N-terminal chain 2; HCF N-terminal chain 3; HCF N-terminal chain 4; HCF N-terminal chain 5; HCF N-terminal chain 6; HCF C-terminal chain 1; HCF C-terminal chain 2; HCF C-terminal chain 3; HCF C-terminal chain 4; HCF C-terminal chain 5; HCF C-terminal chain 6]	Hcfc1	2045	1142.64	21.9	High	0	0.0002969	263.2	0.125	20376.7	28	H-2 Db
B22	MHC-DB	High	NLFLNLLSL	9		1	2	Q61194	P3C2A_MOUSE	Phosphatidylinositol 4-phosphate 3-kinase C2 domain-containing subunit alpha (PI3K-C2-alpha) (PtdIns-3-kinase C2 subunit alpha) (EC 2.7.1.154) (Cpk-m) (Phosphoinositide 3-kinase-C2-alpha) (p170)	Pik3c2a Cpk	1686	1046.62	28.2	High	0	0.000518	2498	0.7	1708.6	3	H-2 Db
B22	MHC-DB	High	VAPKNYSETI	10		1	1	Q61216	MRE11_MOUSE	Double-strand break repair protein MRE11A (MmMRE11A) (Meiotic recombination 11 homolog 1) (MRE11 homolog 1) (Meiotic recombination 11 homolog A) (MRE11 homolog A)	Mre11a Mre11	706	1121.58	12.19	High	0.002	0.01481	20.5	0.015	1956.9	3	H-2 Db
Y3	MHC-DB	High	RGLSRYPNL	9		1	2	Q61239	FNTA_MOUSE	Protein farnesyltransferase/geranylgeranyltransferase type-1 subunit alpha (EC 2.5.1.58) (EC 2.5.1.59) (CAAX farnesyltransferase subunit alpha) (FTase-alpha) (Ras proteins prenyltransferase subunit alpha) (Type I protein geranyl-geranyltransferase subunit alpha) (GGTase-I-alpha)	Fnta	377	1075.6	18.73	High	0.003	0.002023	25012.7	9.5	14.4	0.04	H-2 Kb
B22	MHC-DB	High	RSLADVDTI	9		1	3	Q61292	LAMB2_MOUSE	Laminin subunit beta-2 (Laminin-11 subunit beta) (Laminin-14 subunit beta) (Laminin-15 subunit beta) (Laminin-3 subunit beta) (Laminin-4 subunit beta) (Laminin-7 subunit beta) (Laminin-9 subunit beta) (S-laminin subunit beta) (S-LAM beta)	Lamb2 Lams	1799	989.526	25.62	High	0.001	0.007712	56.1	0.04	23070.6	33	H-2 Db
Y3	MHC-DB	High	TPAAVNPPEM	10	1xOxidation [M10]	1	5	Q61324	ARNT2_MOUSE	Aryl hydrocarbon receptor nuclear translocator 2 (ARNT protein 2)	Arnt2 Kiaa0307	712	1042.49	10.19	High	0.009	0.02739	1521.7	0.5	22622	32	H-2 Db
Y3	MHC-DB	High	SAFEHTQM	8		1	3	Q61334	BAP29_MOUSE	B-cell receptor-associated protein 29 (BCR-associated protein 29) (Bap29)	Bcap29 Bap29	240	950.404	41.51	High	0	9.93e-14	12818.4	4	53.5	0.175	H-2 Kb
B22	MHC-DB	High	IAEENDVACL	10		1	1	Q61410	KGP2_MOUSE	cGMP-dependent protein kinase 2 (cGK 2) (cGK2) (EC 2.7.11.12) (cGMP-dependent protein kinase II) (cGKII)	Prkg2 Prkgr2	762	1076.49	11.35	High	0.006	0.06187	6133.4	1.6	17537.2	23	H-2 Db
Y3	MHC-DB	High	YGVLFRNL	8		1	2	Q61451	CD53_MOUSE	Leukocyte surface antigen CD53 (Cell surface glycoprotein CD53) (CD antigen CD53)	Cd53	219	981.552	24.23	High	0	0.000932	23672.9	9	13.3	0.04	H-2 Kb
B22	MHC-DB	High	KAVANGKVL	9		1	2	Q61458	CCNH_MOUSE	Cyclin-H	Ccnh	323	899.567	34.11	High	0	2.031e-05	62.2	0.04	12156.7	16	H-2 Db
Y3	MHC-DB	High	SSPQFVGNL	9		1	4	Q61458	CCNH_MOUSE	Cyclin-H	Ccnh	323	948.479	23.05	High	0.003	0.003654	4442.6	1.2	8.2	0.025	H-2 Kb
B22	MHC-DB	High	AMWANEQAL	9		1	1	Q61462	CY24A_MOUSE	Cytochrome b-245 light chain (Cytochrome b(558) alpha chain) (Cytochrome b558 subunit alpha) (Neutrophil cytochrome b 22 kDa polypeptide) (Superoxide-generating NADPH oxidase light chain subunit) (p22 phagocyte B-cytochrome) (p22-phox) (p22phox)	Cyba	192	1033.48	40.18	High	0	3.38e-07	155.4	0.09	802.5	1.5	H-2 Db
B22	MHC-DB	High	SQLELKSLI	9		1	3	Q61532	MK06_MOUSE	Mitogen-activated protein kinase 6 (MAP kinase 6) (MAPK 6) (EC 2.7.11.24) (Extracellular signal-regulated kinase 3) (ERK-3)	Mapk6 Erk3 Prkm4 Prkm6	720	1030.61	40.65	High	0	2.823e-06	2201.3	0.7	3189.5	4.5	H-2 Db
Y3	MHC-DB	High	SQLELKSLI	9		1	1	Q61532	MK06_MOUSE	Mitogen-activated protein kinase 6 (MAP kinase 6) (MAPK 6) (EC 2.7.11.24) (Extracellular signal-regulated kinase 3) (ERK-3)	Mapk6 Erk3 Prkm4 Prkm6	720	1030.61	23.16	High	0.003	0.000932	2201.3	0.7	3189.5	4.5	H-2 Db
B22	MHC-DB	High	VSLQVKMHF	9	1xOxidation [M7]	1	6	Q61618	AA3R_MOUSE	Adenosine receptor A3 (A3AR)	Adora3 Gpcr2	319	1104.59	12.46	High	0.003	0.03851	25007.6	9.5	862.3	1.6	H-2 Kb
B22	MHC-DB	High	YIHINIGAL	9		1	2	Q61656	DDX5_MOUSE	Probable ATP-dependent RNA helicase DDX5 (EC 3.6.4.13) (DEAD box RNA helicase DEAD1) (mDEAD1) (DEAD box protein 5) (RNA helicase p68)	Ddx5 Tnz2	614	1013.58	49.47	High	0	1.205e-05	382.8	0.175	1343	2.5	H-2 Db
Y3	MHC-DB	High	STQQYGSNV	9		1	2	Q61656	DDX5_MOUSE	Probable ATP-dependent RNA helicase DDX5 (EC 3.6.4.13) (DEAD box RNA helicase DEAD1) (mDEAD1) (DEAD box protein 5) (RNA helicase p68)	Ddx5 Tnz2	614	983.443	39.62	High	0	2.26e-15	37864.3	25	396.4	0.9	H-2 Kb
B22	MHC-DB	High	TGVVNGESL	9		1	2	Q61666	HIRA_MOUSE	Protein HIRA (TUP1-like enhancer of split protein 1)	Hira Tuple1	1015	875.447	34.51	High	0	0.001683	43.3	0.03	9329.9	12	H-2 Db
B22	MHC-DB	High	AVSNGYLVSL	10		1	1	Q61672	S29A2_MOUSE	Equilibrative nucleoside transporter 2 (36 kDa hydrophobic nucleolar protein) (36 kDa nucleolar protein HNP36) (Delayed-early response protein 12) (Equilibrative nitrobenzylmercaptopurine riboside-insensitive nucleoside transporter) (Equilibrative NBMPR-insensitive nucleoside transporter) (Nucleoside transporter, ei-type) (Solute carrier family 29 member 2)	Slc29a2 Der12 Ent2 Hnp36	456	1022.55	12.49	High	0.003	0.02978	31344.6	15	1182.6	2	H-2 Kb
Y3	MHC-DB	High	VNFIKENLL	9		2	1	Q61687	ATRX_MOUSE	Transcriptional regulator ATRX (EC 3.6.4.12) (ATP-dependent helicase ATRX) (HP1 alpha-interacting protein) (HP1-BP38 protein) (Heterochromatin protein 2) (X-linked nuclear protein)	Atrx Hp1bp2 Xnp	2476	1089.63	11.71	High	0	4.28e-09	23413.1	8.5	55.6	0.175	H-2 Kb
B22	MHC-DB	High	YMPLENTYI	9		1	1	Q61712	DNJC1_MOUSE	DnaJ homolog subfamily C member 1 (DnaJ protein homolog MTJ1)	Dnajc1 Dnajl1 Mtj1	552	1143.54	19.08	High	0.002	0.01225	916.4	0.4	7997.9	11	H-2 Db
B22	MHC-DB	High	TGVVNAQAL	9		1	4	Q61753	SERA_MOUSE	D-3-phosphoglycerate dehydrogenase (3-PGDH) (EC 1.1.1.95) (A10)	Phgdh	533	872.484	48.49	High	0	2.582e-05	50.8	0.04	2996	4.5	H-2 Db
Y3	MHC-DB	High	TGVVNAQAL	9		1	2	Q61753	SERA_MOUSE	D-3-phosphoglycerate dehydrogenase (3-PGDH) (EC 1.1.1.95) (A10)	Phgdh	533	872.484	40.84	High	0	0.000932	50.8	0.04	2996	4.5	H-2 Db
B22	MHC-DB	High	SQNHLQASYM	10	1xOxidation [M10]	1	1	Q61789	LAMA3_MOUSE	Laminin subunit alpha-3 (Epiligrin subunit alpha) (Kalinin subunit alpha) (Laminin-5 subunit alpha) (Laminin-6 subunit alpha) (Laminin-7 subunit alpha) (Nicein subunit alpha)	Lama3	3330	1194.52	17.81	High	0.004	0.04935	2829.4	0.8	9282.9	12	H-2 Db
Y3	MHC-DB	High	ITYNLKVL	8		1	1	Q61790	LAG3_MOUSE	Lymphocyte activation gene 3 protein (LAG-3) (CD antigen CD223)	Lag3	521	963.587	14.15	High	0.007	0.02739	11205.4	3	63.5	0.2	H-2 Kb
B22	MHC-DB	High	VAAANREVL	9		1	4	Q61806	XL3C_MOUSE	X-linked lymphocyte-regulated protein 3C (XLR-related protein A12)	Xlr3c Xlr3b	226	942.537	65.41	High	0	2.471e-05	16.5	0.01	6123.6	8	H-2 Db
Y3	MHC-DB	High	VAAANREVL	9		1	2	Q61806	XL3C_MOUSE	X-linked lymphocyte-regulated protein 3C (XLR-related protein A12)	Xlr3c Xlr3b	226	942.537	43.43	High	0.002	0.000932	16.5	0.01	6123.6	8	H-2 Db
B22	MHC-DB	High	DIENEQTL	8		1	1	Q61823	PDCD4_MOUSE	Programmed cell death protein 4 (Protein MA-3) (Topoisomerase-inhibitor suppressed protein)	Pdcd4 Ma3 Tis	469	961.447	12.96	High	0.003	0.02904	29837.2	14	34631.6	65	H-2 Db
Y3	MHC-DB	High	KIIEFANI	8		1	2	Q61884	MNS1_MOUSE	Meiosis-specific nuclear structural protein 1	Mns1	491	947.556	31.35	High	0	9.98e-16	32369.6	17	11	0.03	H-2 Kb
B22	MHC-DB	High	SSMTNSTAA	9		1	2	Q61990	PCBP2_MOUSE	Poly(rC)-binding protein 2 (Alpha-CP2) (CTBP) (CBP) (Putative heterogeneous nuclear ribonucleoprotein X) (hnRNP X)	Pcbp2 Cbp Hnrnpx Hnrpx	362	869.367	35.32	High	0	0.0006516	34.2	0.025	3736.2	5.5	H-2 Db
B22	MHC-DB	Medium	FAPSNEAWEN	10		1	1	Q62009	POSTN_MOUSE	Periostin (PN) (Osteoblast-specific factor 2) (OSF-2)	Postn Osf2	838	1164.5	10.86	Medium	0.034	0.2212	5509.2	1.4	39045	80	H-2 Db
B22	MHC-DB	High	AFLDNVTTM	9	1xOxidation [M9]	1	1	Q62052	P_MOUSE	P protein (Melanocyte-specific transporter protein) (Pink-eyed dilution protein)	Oca2 P	833	1027.48	10.31	High	0.002	0.01862	1002.8	0.4	2444.2	4	H-2 Db
B22	MHC-DB	High	SMFFLNSFV	9	1xOxidation [M2]	1	1	Q62052	P_MOUSE	P protein (Melanocyte-specific transporter protein) (Pink-eyed dilution protein)	Oca2 P	833	1107.52	10.22	High	0.008	0.06941	1495.5	0.5	345.9	0.8	H-2 Db
B22	MHC-DB	High	SQLRNEVAI	9		1	1	Q62101	KPCD1_MOUSE	Serine/threonine-protein kinase D1 (EC 2.7.11.13) (Protein kinase C mu type) (Protein kinase D) (nPKC-D1) (nPKC-mu)	Prkd1 Pkcm Pkd Prkcm	918	1029.57	24.85	High	0.001	0.005795	9.8	0.01	3371.6	5	H-2 Db
Y3	MHC-DB	High	VSYPHLVLL	9		1	4	Q62137	JAK3_MOUSE	Tyrosine-protein kinase JAK3 (EC 2.7.10.2) (Janus kinase 3) (JAK-3)	Jak3	1100	1040.61	36.2	High	0	0.0004084	3810.5	1	9.5	0.03	H-2 Kb
B22	MHC-DB	High	IALFNQELV	9		1	1	Q62141	SIN3B_MOUSE	Paired amphipathic helix protein Sin3b (Histone deacetylase complex subunit Sin3b) (Transcriptional corepressor Sin3b)	Sin3b Kiaa0700	1098	1046.59	25.47	High	0	0.0002773	17.4	0.01	1139.6	2	H-2 Db
Y3	MHC-DB	High	VFTEVANL	8		1	2	Q62141	SIN3B_MOUSE	Paired amphipathic helix protein Sin3b (Histone deacetylase complex subunit Sin3b) (Transcriptional corepressor Sin3b)	Sin3b Kiaa0700	1098	892.478	34.57	High	0.003	0.000932	39643.1	29	195.2	0.5	H-2 Kb
B22	MHC-DB	High	SAPQNGFWAV	10		1	4	Q62158	TRI27_MOUSE	Zinc finger protein RFP (EC 6.3.2.-) (Ret finger protein) (Tripartite motif-containing protein 27)	Trim27 Rfp	513	1076.52	25.7	High	0	0.002496	54.5	0.04	14290	19	H-2 Db
Y3	MHC-DB	High	IVWEFEQL	8		1	4	Q62158	TRI27_MOUSE	Zinc finger protein RFP (EC 6.3.2.-) (Ret finger protein) (Tripartite motif-containing protein 27)	Trim27 Rfp	513	1063.55	35.2	High	0	9.98e-16	21549.7	7.5	9.6	0.03	H-2 Kb
Y3	MHC-DB	High	SNVKHVINF	9		1	3	Q62167	DDX3X_MOUSE	ATP-dependent RNA helicase DDX3X (EC 3.6.4.13) (D1Pas1-related sequence 2) (DEAD box RNA helicase DEAD3) (mDEAD3) (DEAD box protein 3, X-chromosomal) (Embryonic RNA helicase)	Ddx3x D1Pas1-rs2 Ddx3 Dead3 Erh	662	1057.58	33.26	High	0.006	0.02739	34590.1	19	436.4	1	H-2 Kb
Y3	MHC-DB	High	SANKFENL	8		1	2	Q62192	CD180_MOUSE	CD180 antigen (Lymphocyte antigen 78) (Ly-78) (Radioprotective 105 kDa protein) (CD antigen CD180)	Cd180 Ly78 Rp105	661	922.463	30.33	High	0	9.98e-16	22260	8	47.3	0.15	H-2 Kb
B22	MHC-DB	High	SSPLNSRAV	9		1	2	Q62210	BIRC2_MOUSE	Baculoviral IAP repeat-containing protein 2 (EC 6.3.2.-) (Cellular inhibitor of apoptosis 1) (C-IAP1) (Inhibitor of apoptosis protein 2) (mIAP2)	Birc2	612	930.5	23.43	High	0.002	0.01463	178	0.1	1392.4	2.5	H-2 Db
B22	MHC-DB	Medium	VAVGRDLPV	9		1	1	Q62240	KDM5D_MOUSE	Lysine-specific demethylase 5D (EC 1.14.11.-) (Histocompatibility Y antigen) (H-Y) (Histone demethylase JARID1D) (Jumonji/ARID domain-containing protein 1D) (Protein SmcY)	Kdm5d Hya Jarid1d Smcy	1548	925.547	10.91	Medium	0.043	0.2586	24594.9	9.5	925.5	1.7	H-2 Kb
Y3	MHC-DB	High	VQYVLPRL	8		1	1	Q62245	SOS1_MOUSE	Son of sevenless homolog 1 (SOS-1) (mSOS-1)	Sos1	1319	987.599	24.47	High	0.003	0.00163	15145.3	4.5	12.3	0.04	H-2 Kb
B22	MHC-DB	High	ILHTNLVYL	9		1	3	Q62280	SSXT_MOUSE	Protein SSXT (Protein SYT) (Synovial sarcoma-associated Ss18-alpha)	Ss18 Ssxt Syt	418	1085.64	20.32	High	0.001	0.009957	151	0.09	885.1	1.6	H-2 Db
Y3	MHC-DB	High	VVYDLSIRGF	10		1	3	Q62348	TSN_MOUSE	Translin (EC 3.1.-.-) (Component 3 of promoter of RISC) (C3PO) (Testis/brain RNA-binding protein) (TB-RBP)	Tsn	228	1168.64	64.6	High	0	9.98e-16	39239.4	28	641.5	1.3	H-2 Kb
Y3	MHC-DB	High	LSYTRFSLA	9		1	3	Q62351	TFR1_MOUSE	Transferrin receptor protein 1 (TR) (TfR) (TfR1) (Trfr) (CD antigen CD71)	Tfrc Trfr	763	1057.57	49.27	High	0	2.63e-10	26995.3	11	29.5	0.09	H-2 Kb
B22	MHC-DB	High	FAPRDPIPYL	10		1	2	Q62376	RU17_MOUSE	U1 small nuclear ribonucleoprotein 70 kDa (U1 snRNP 70 kDa) (U1-70K) (snRNP70)	Snrnp70 Snrp70	448	1188.64	16.51	High	0.004	0.04312	575.8	0.25	13690.2	18	H-2 Db
Y3	MHC-DB	High	YAYSFKYL	8		1	1	Q62383	SPT6H_MOUSE	Transcription elongation factor SPT6	Supt6h Kiaa0162 Supt6	1726	1054.52	21.89	High	0	9.98e-16	2086.3	0.6	4.6	0.01	H-2 Kb
Y3	MHC-DB	High	QAYQYEQI	8		1	2	Q62383	SPT6H_MOUSE	Transcription elongation factor SPT6	Supt6h Kiaa0162 Supt6	1726	1042.48	15.61	High	0	2.58e-12	11187.2	3	55.3	0.175	H-2 Kb
B22	MHC-DB	High	FMISHLDYL	9		1	3	Q62388	ATM_MOUSE	Serine-protein kinase ATM (EC 2.7.11.1) (Ataxia telangiectasia mutated homolog) (A-T mutated homolog)	Atm	3066	1138.56	28.34	High	0	1.716e-05	27.7	0.02	244.7	0.6	H-2 Db
B22	MHC-DB	High	FMISHLDYL	9	1xOxidation [M2]	1	2	Q62388	ATM_MOUSE	Serine-protein kinase ATM (EC 2.7.11.1) (Ataxia telangiectasia mutated homolog) (A-T mutated homolog)	Atm	3066	1154.56	25.8	High	0	0.0001242	27.7	0.02	244.7	0.6	H-2 Db
Y3	MHC-DB	High	VIIELIQL	8		1	1	Q62388	ATM_MOUSE	Serine-protein kinase ATM (EC 2.7.11.1) (Ataxia telangiectasia mutated homolog) (A-T mutated homolog)	Atm	3066	940.608	22.04	High	0.003	0.000932	30677.6	15	99.8	0.3	H-2 Kb
Y3	MHC-DB	Medium	KEYMNTSEV	9	1xOxidation [M4]	1	1	Q62394	ZN185_MOUSE	Zinc finger protein 185 (LIM domain protein Zfp185) (P1-A)	Znf185 Zfp185	352	1116.49	14.82	Medium	0.022	0.09212	3241.5	0.9	5786	7.5	H-2 Db
B22	MHC-DB	High	SLLRNIHLM	9		1	1	Q62417	SRBS1_MOUSE	Sorbin and SH3 domain-containing protein 1 (Ponsin) (SH3 domain protein 5) (SH3P12) (c-Cbl-associated protein) (CAP)	Sorbs1 Kiaa1296 Sh3d5	1290	1096.63	15.86	High	0	0.0009155	71.6	0.05	3723.1	5.5	H-2 Db
Y3	MHC-DB	High	SVYQKTNAI	9		1	1	Q62418	DBNL_MOUSE	Drebrin-like protein (Actin-binding protein 1) (SH3 domain-containing protein 7)	Dbnl Abp1 Sh3p7	436	1023.55	19.41	High	0.003	0.006716	3664.9	1	422.4	0.9	H-2 Kb
Y3	MHC-DB	High	KSLERATQL	9		1	2	Q63829	COMD3_MOUSE	COMM domain-containing protein 3 (Bmi-1 upstream gene protein) (Bup protein)	Commd3 Bup	195	1045.6	36.25	High	0	9.98e-16	13056.1	4	327.8	0.8	H-2 Kb
Y3	MHC-DB	High	VGPRYTQL	8		1	5	Q63844	MK03_MOUSE	Mitogen-activated protein kinase 3 (MAP kinase 3) (MAPK 3) (EC 2.7.11.24) (ERT2) (Extracellular signal-regulated kinase 1) (ERK-1) (Insulin-stimulated MAP2 kinase) (MAP kinase isoform p44) (p44-MAPK) (MNK1) (Microtubule-associated protein 2 kinase) (p44-ERK1)	Mapk3 Erk1 Prkm3	380	933.515	32.76	High	0.002	0.000932	26147	11	6.8	0.02	H-2 Kb
B22	MHC-DB	Medium	SILQQDIL	8		1	1	Q640L5	CCD18_MOUSE	Coiled-coil domain-containing protein 18	Ccdc18	1455	929.53	14.7	Medium	0.011	0.08816	19413.2	6.5	7978.8	11	H-2 Db
B22	MHC-DB	High	ETIMNQEKL	9		1	3	Q64152	BTF3_MOUSE	Transcription factor BTF3 (Nascent polypeptide-associated complex subunit beta) (NAC-beta) (RNA polymerase B transcription factor 3)	Btf3	204	1105.56	26.32	High	0	0.0002008	2946.4	0.8	12945.4	17	H-2 Db
B22	MHC-DB	High	ETIMNQEKL	9	1xOxidation [M4]	1	1	Q64152	BTF3_MOUSE	Transcription factor BTF3 (Nascent polypeptide-associated complex subunit beta) (NAC-beta) (RNA polymerase B transcription factor 3)	Btf3	204	1121.55	21.39	High	0	0.00144	2946.4	0.8	12945.4	17	H-2 Db
B22	MHC-DB	High	NTPENREYL	9		1	4	Q641P0	ARP3B_MOUSE	Actin-related protein 3B (ARP3-beta) (Actin-like protein 3B)	Actr3b	418	1135.54	41.44	High	0	0.0002578	77	0.05	15342.6	20	H-2 Db
Y3	MHC-DB	High	STPEFFQV	8		1	1	Q641P0	ARP3B_MOUSE	Actin-related protein 3B (ARP3-beta) (Actin-like protein 3B)	Actr3b	418	954.457	16.67	High	0.003	0.00425	32011.6	16	47	0.15	H-2 Kb
Y3	MHC-DB	High	RIYSFQMAL	9		1	2	Q64261	CDK6_MOUSE	Cyclin-dependent kinase 6 (EC 2.7.11.22) (CR2 protein kinase) (CRK2) (Cell division protein kinase 6) (Serine/threonine-protein kinase PLSTIRE)	Cdk6 Cdkn6 Crk2	326	1128.59	22.07	High	0	9.98e-16	12977.9	4	7.1	0.02	H-2 Kb
B22	MHC-DB	High	SALANGRAL	9		1	1	Q64317	DLX1_MOUSE	Homeobox protein DLX-1	Dlx1	255	872.495	32.73	High	0.001	0.00797	17.1	0.01	1610	3	H-2 Db
B22	MHC-DB	Medium	MFRNMGYL	8	1xOxidation [M1]	1	1	Q64326	ACTHR_MOUSE	Adrenocorticotropic hormone receptor (ACTH receptor) (ACTH-R) (Adrenocorticotropin receptor) (Melanocortin receptor 2) (MC2-R)	Mc2r Acthr	296	1047.48	13.22	Medium	0.02	0.149	930.6	0.4	1201.8	2.5	H-2 Db
Y3	MHC-DB	High	VNIEFKDL	8		1	4	Q64343	ABCG1_MOUSE	ATP-binding cassette sub-family G member 1 (ATP-binding cassette transporter 8) (White protein homolog)	Abcg1 Abc8 Wht1	666	977.53	49.2	High	0	9.98e-16	34236	19	31.2	0.09	H-2 Kb
B22	MHC-DB	Medium	LNLIFFIL	8		1	1	Q64446	ATP7B_MOUSE	Copper-transporting ATPase 2 (EC 3.6.3.54) (Copper pump 2) (Wilson disease-associated protein homolog)	Atp7b Wnd	1462	992.618	14.87	Medium	0.017	0.1314	25731.6	10	76.5	0.25	H-2 Kb
B22	MHC-DB	High	SVYVYKVL	8		1	1	Q64478	H2B1H_MOUSE	Histone H2B type 1-H (h2B-221)	Hist1h2bh	126	970.561	17.64	High	0.002	0.0122	21731.9	7.5	6.7	0.02	H-2 Kb
Y3	MHC-DB	High	SVYVYKVL	8		1	5	Q64478	H2B1H_MOUSE	Histone H2B type 1-H (h2B-221)	Hist1h2bh	126	970.561	35.06	High	0.003	0.003651	21731.9	7.5	6.7	0.02	H-2 Kb
B22	MHC-DB	High	NSMVLFDHM	9	2xOxidation [M3; M9]	1	2	Q64511	TOP2B_MOUSE	DNA topoisomerase 2-beta (EC 5.99.1.3) (DNA topoisomerase II, beta isozyme)	Top2b	1612	1125.47	48.04	High	0	1.361e-05	340.5	0.175	637.3	1.3	H-2 Db
B22	MHC-DB	High	NSMVLFDHM	9		1	3	Q64511	TOP2B_MOUSE	DNA topoisomerase 2-beta (EC 5.99.1.3) (DNA topoisomerase II, beta isozyme)	Top2b	1612	1093.48	41.57	High	0	0.002696	340.5	0.175	637.3	1.3	H-2 Db
B22	MHC-DB	High	NSMVLFDHM	9	1xOxidation [M]	1	5	Q64511	TOP2B_MOUSE	DNA topoisomerase 2-beta (EC 5.99.1.3) (DNA topoisomerase II, beta isozyme)	Top2b	1612	1109.48	38.16	High	0	0.001559	340.5	0.175	637.3	1.3	H-2 Db
B22	MHC-DB	High	LAVRNDEEL	9		1	2	Q64522	H2A2B_MOUSE	Histone H2A type 2-B (H2a-613A)	Hist2h2ab	130	1058.55	17.05	High	0	0.001266	22.7	0.015	7959.3	11	H-2 Db
Y3	MHC-DB	High	SGPQFVQL	8		1	4	Q64693	OBF1_MOUSE	POU domain class 2-associating factor 1 (B-cell-specific coactivator OBF-1) (BOB-1) (BOB1) (OCA-B) (OCT-binding factor 1)	Pou2af1 Obf-1	256	875.462	39.08	High	0.003	0.003654	14436	4.5	17.1	0.05	H-2 Kb
Y3	MHC-DB	High	GTLRFGVL	8		1	2	Q64697	PTCA_MOUSE	Protein tyrosine phosphatase receptor type C-associated protein (PTPRC-associated protein) (CD45-associated protein) (CD45-AP) (LSM-1)	Ptprcap	197	862.515	32.01	High	0.004	0.02296	28536.1	13	430.4	1	H-2 Kb
Y3	MHC-DB	High	SLIEFFNKM	9		1	3	Q64700	RBL2_MOUSE	Retinoblastoma-like protein 2 (130 kDa retinoblastoma-associated protein) (p130) (Retinoblastoma-related protein 2) (RBR-2) (pRb2)	Rbl2	1135	1128.58	43.87	High	0	9.98e-16	7929.4	2	74.7	0.25	H-2 Kb
Y3	MHC-DB	High	VAMVFKTL	8		2	2	Q65Z40	WAPL_MOUSE	Wings apart-like protein homolog (Dioxin-inducible factor 2) (DIF-2) (WAPL cohesin release factor)	Wapl Kiaa0261 Wapal	1200	908.527	38.79	High	0	2.67e-15	9220.4	2.5	8.3	0.025	H-2 Kb
B22	MHC-DB	High	VVTTNDMDML	10	2xOxidation [M7; M9]	1	1	Q66JQ7	CASC5_MOUSE	Protein CASC5 (Cancer susceptibility candidate gene 5 protein homolog) (Kinetochore-null protein 1)	Casc5 Knl1	1612	1170.5	16.72	High	0.009	0.07587	5301	1.4	7725.6	10	H-2 Db
Y3	MHC-DB	High	VRVFFSGL	8		1	1	Q66JV4	R12BB_MOUSE	RNA-binding protein 12B-B (RNA-binding motif protein 12B-B)	Rbm12b2 Rbm12bb	834	924.53	30.25	High	0	9.98e-16	40475.3	31	49	0.15	H-2 Kb
B22	MHC-DB	High	MAFSLTVPTL	10	1xOxidation [M1]	1	1	Q66JY2	IN80D_MOUSE	INO80 complex subunit D	Ino80d	873	1095.58	18.78	High	0	0.002875	2664.3	0.8	1244.7	2.5	H-2 Db
B22	MHC-DB	High	GGPENVAEM	9		1	4	Q689Z5	SBNO1_MOUSE	Protein strawberry notch homolog 1 (mSno1)	Sbno1 Sno1	1390	903.388	35.85	High	0	0.001573	67.4	0.05	17391.5	23	H-2 Db
B22	MHC-DB	High	GGPENVAEM	9	1xOxidation [M9]	1	3	Q689Z5	SBNO1_MOUSE	Protein strawberry notch homolog 1 (mSno1)	Sbno1 Sno1	1390	919.383	23.25	High	0.003	0.03011	67.4	0.05	17391.5	23	H-2 Db
Y3	MHC-DB	High	RVMEYINRL	9		1	4	Q68FD5	CLH1_MOUSE	Clathrin heavy chain 1	Cltc	1675	1193.65	25.01	High	0	2.23e-07	30851	15	78.4	0.25	H-2 Kb
Y3	MHC-DB	High	RVMEYINRL	9	1xOxidation [M3]	1	2	Q68FD5	CLH1_MOUSE	Clathrin heavy chain 1	Cltc	1675	1209.64	13.28	High	0.003	0.01666	30851	15	78.4	0.25	H-2 Kb
Y3	MHC-DB	Medium	IQLIAMQPI	9	1xOxidation [M6]	1	2	Q68FD9	K1549_MOUSE	UPF0606 protein KIAA1549	Kiaa1549	1940	1042.6	22.77	Medium	0.016	0.07139	1231.8	0.4	1290.9	2.5	H-2 Db
Y3	MHC-DB	High	RVYEWFGL	8		1	2	Q69ZB8	ZCHC2_MOUSE	Zinc finger CCHC domain-containing protein 2	Zcchc2 Kiaa1744	1166	1069.55	16.82	High	0	9.98e-16	29679.5	14	16.4	0.05	H-2 Kb
B22	MHC-DB	High	ATVSNGPFL	9		1	5	Q69ZF8	MSL2_MOUSE	E3 ubiquitin-protein ligase MSL2 (EC 6.3.2.-) (Male-specific lethal 2-like 1) (MSL2-like 1) (Male-specific lethal-2 homolog) (MSL-2) (Male-specific lethal-2 homolog 1) (RING finger protein 184)	Msl2 Kiaa1585 Msl2l1 Rnf184	577	905.473	50.77	High	0	7.41e-07	40.9	0.03	5319.8	7	H-2 Db
B22	MHC-DB	High	FTVSNFVDNL	10		1	2	Q69ZK9	NLGN2_MOUSE	Neuroligin-2	Nlgn2 Kiaa1366	836	1155.57	26.9	High	0	4.528e-05	209.6	0.125	1303.2	2.5	H-2 Db
B22	MHC-DB	High	SAPDNVLEV	9		1	4	Q69ZR2	HECD1_MOUSE	E3 ubiquitin-protein ligase HECTD1 (EC 6.3.2.-) (HECT domain-containing protein 1) (Protein open mind)	Hectd1 Kiaa1131 Opm	2618	943.473	22.71	High	0.002	0.01873	119.9	0.08	4987	7	H-2 Db
B22	MHC-DB	High	TALENLIVL	9		1	2	Q69ZR2	HECD1_MOUSE	E3 ubiquitin-protein ligase HECTD1 (EC 6.3.2.-) (HECT domain-containing protein 1) (Protein open mind)	Hectd1 Kiaa1131 Opm	2618	985.593	20.84	High	0	0.0004761	9.2	0.01	1187.5	2.5	H-2 Db
B22	MHC-DB	High	KQLLNLVVI	9		1	1	Q69ZS7	HBS1L_MOUSE	HBS1-like protein	Hbs1l Hbs1 Kiaa1038	682	1039.69	11.16	High	0	0.0009313	12.6	0.01	6079.1	8	H-2 Db
B22	MHC-DB	High	VSPQNVHHSYL	11		1	5	Q69ZS7	HBS1L_MOUSE	HBS1-like protein	Hbs1l Hbs1 Kiaa1038	682	1280.64	27.65	High	0	0.004711	147.9	0.09	282.6	0.7	H-2 Db
B22	MHC-DB	High	RQVQNTAITL	10		1	2	Q69ZX6	MOR2A_MOUSE	MORC family CW-type zinc finger protein 2A (Zinc finger CW-type coiled-coil domain protein 1)	Morc2a Kiaa0852 Zcwcc1	1030	1143.65	23.75	High	0	4.784e-05	99.8	0.06	15834	21	H-2 Db
B22	MHC-DB	Medium	YSQDIYENL	9		1	1	Q69ZX8	ABLM3_MOUSE	Actin-binding LIM protein 3 (abLIM-3) (Actin-binding LIM protein family member 3)	Ablim3 Kiaa0843	682	1144.52	11.85	Medium	0.011	0.08745	31769.7	16	575.7	1.2	H-2 Kb
Y3	MHC-DB	High	MNITYSNL	8		1	1	Q6A009	LTN1_MOUSE	E3 ubiquitin-protein ligase listerin (EC 6.3.2.-) (RING finger protein 160) (Zinc finger protein 294) (Zfp-294)	Ltn1 Kiaa0714 Lister Rnf160 Zfp294 Znf294	1767	955.455	38.23	High	0	2.66e-11	34258.9	19	4.2	0.01	H-2 Kb
B22	MHC-DB	High	FSLENVPEGEL	11		1	1	Q6A037	N4BP1_MOUSE	NEDD4-binding protein 1 (N4BP1)	N4bp1 Kiaa0615	893	1233.6	11.5	High	0.007	0.06371	274.5	0.15	15246	20	H-2 Db
B22	MHC-DB	High	MAPENKVADWL	11		1	3	Q6A065	CE170_MOUSE	Centrosomal protein of 170 kDa (Cep170)	Cep170 Kiaa0470	1588	1273.62	39.19	High	0	0.0002194	190.2	0.1	19074	26	H-2 Db
B22	MHC-DB	High	SGITNSASSTL	11		1	2	Q6A068	CDC5L_MOUSE	Cell division cycle 5-like protein (Cdc5-like protein)	Cdc5l Kiaa0432	802	1037.51	54.48	High	0	1.47e-07	304.4	0.15	8356.6	11	H-2 Db
B22	MHC-DB	High	FATNNSEHI	9		1	1	Q6A068	CDC5L_MOUSE	Cell division cycle 5-like protein (Cdc5-like protein)	Cdc5l Kiaa0432	802	1032.47	14.75	High	0.001	0.006131	42.4	0.03	9856.7	13	H-2 Db
Y3	MHC-DB	High	SSLKFLLL	8		1	4	Q6AXC6	DDX11_MOUSE	Probable ATP-dependent DNA helicase DDX11 (EC 3.6.4.12) (DEAD/H box protein 11)	Ddx11	880	920.582	37.77	High	0	9.98e-16	12608.8	3.5	6.1	0.015	H-2 Kb
B22	MHC-DB	High	TQVLNTHYV	9		1	2	Q6DIC0	SMCA2_MOUSE	Probable global transcription activator SNF2L2 (EC 3.6.4.-) (ATP-dependent helicase SMARCA2) (BRG1-associated factor 190B) (BAF190B) (Protein brahma homolog) (SNF2-alpha) (SWI/SNF-related matrix-associated actin-dependent regulator of chromatin subfamily A member 2)	Smarca2 Baf190b Brm Snf2a Snf2l2	1577	1074.56	37.19	High	0	1.083e-05	18.1	0.01	8712.1	11	H-2 Db
B22	MHC-DB	High	FAFRNFLYL	9		1	2	Q6DIC0	SMCA2_MOUSE	Probable global transcription activator SNF2L2 (EC 3.6.4.-) (ATP-dependent helicase SMARCA2) (BRG1-associated factor 190B) (BAF190B) (Protein brahma homolog) (SNF2-alpha) (SWI/SNF-related matrix-associated actin-dependent regulator of chromatin subfamily A member 2)	Smarca2 Baf190b Brm Snf2a Snf2l2	1577	1190.64	15.25	High	0	0.005732	12.3	0.01	35.7	0.125	H-2 Db
Y3	MHC-DB	High	VWYWRRITM	9		2	1	Q6DID7	WLS_MOUSE	Protein wntless homolog (Integral membrane protein GPR177) (Protein evenness interrupted homolog) (EVI)	Wls Gpr177	541	1310.68	10.33	High	0	0.000932	19233.4	6.5	48.3	0.15	H-2 Kb
Y3	MHC-DB	High	SGYDFSRL	8		1	3	Q6GQT6	SCAP_MOUSE	Sterol regulatory element-binding protein cleavage-activating protein (SCAP) (SREBP cleavage-activating protein)	Scap Kiaa0199	1276	944.447	44.66	High	0	2.97e-12	26950.4	11	3.6	0.01	H-2 Kb
B22	MHC-DB	High	SSLVNKEDVL	10		1	2	Q6GQT9	NOMO1_MOUSE	Nodal modulator 1	Nomo1	1214	1103.59	36.99	High	0	9.745e-05	19.7	0.015	10225.3	13	H-2 Db
B22	MHC-DB	High	SSLVNKEDV	9		1	3	Q6GQT9	NOMO1_MOUSE	Nodal modulator 1	Nomo1	1214	990.51	37.57	High	0	0.001288	37.5	0.025	6478.4	8.5	H-2 Db
Y3	MHC-DB	High	GILTFSNL	8		1	1	Q6GQT9	NOMO1_MOUSE	Nodal modulator 1	Nomo1	1214	864.483	20.64	High	0.003	0.000932	30243.5	14	15.8	0.05	H-2 Kb
B22	MHC-DB	High	KGIHNFESI	9		1	2	Q6GQV7	EDRF1_MOUSE	Erythroid differentiation-related factor 1	Edrf1	1239	1044.55	32.3	High	0	0.0001079	36.7	0.025	2272.9	3.5	H-2 Db
Y3	MHC-DB	High	SAAKFFQL	8		1	2	Q6GQW0	BTBDB_MOUSE	Ankyrin repeat and BTB/POZ domain-containing protein BTBD11 (BTB/POZ domain-containing protein 11)	Btbd11	1109	911.499	51.34	High	0	9.98e-16	18507.4	6	33.7	0.1	H-2 Kb
Y3	MHC-DB	Medium	TAFDLVML	8	1xOxidation [M7]	1	1	Q6GQX6	ANKS6_MOUSE	Ankyrin repeat and SAM domain-containing protein 6 (SamCystin) (Sterile alpha motif domain-containing protein 6) (SAM domain-containing protein 6)	Anks6 Gm635 Samd6	883	925.47	26.74	Medium	0.015	0.02739	20795.4	7	186.9	0.5	H-2 Kb
B22	MHC-DB	High	GAIVNGKVL	9		1	4	Q6GYP7	RGPA1_MOUSE	Ral GTPase-activating protein subunit alpha-1 (GAP-related-interacting partner to E12) (GRIPE) (GTPase-activating RapGAP domain-like 1) (Tuberin-like protein 1) (p240)	Ralgapa1 Garnl1 Kiaa0884 Tulip1	2035	870.541	39.42	High	0	0.0004789	25.2	0.015	14426.4	19	H-2 Db
B22	MHC-DB	Medium	QSHSNTSTL	9		1	1	Q6GYP7	RGPA1_MOUSE	Ral GTPase-activating protein subunit alpha-1 (GAP-related-interacting partner to E12) (GRIPE) (GTPase-activating RapGAP domain-like 1) (Tuberin-like protein 1) (p240)	Ralgapa1 Garnl1 Kiaa0884 Tulip1	2035	974.454	10.92	Medium	0.02	0.1498	53.1	0.04	2099.9	3.5	H-2 Db
B22	MHC-DB	Medium	GMHYNYLEL	9	1xOxidation [M2]	1	1	Q6IQX7	CHSS2_MOUSE	Chondroitin sulfate synthase 2 (EC 2.4.1.175) (EC 2.4.1.226) (Chondroitin glucuronyltransferase 2) (Chondroitin-polymerizing factor) (ChPF) (Glucuronosyl-N-acetylgalactosaminyl-proteoglycan 4-beta-N-acetylgalactosaminyltransferase II) (N-acetylgalactosaminyl-proteoglycan 3-beta-glucuronosyltransferase II) (N-acetylgalactosaminyltransferase 2)	Chpf Css2 D1Bwg1363e	774	1155.51	13.54	Medium	0.024	0.1735	199	0.125	432.2	1	H-2 Db
B22	MHC-DB	High	NAVRNLQEL	9		1	1	Q6IQY5	CEP70_MOUSE	Centrosomal protein of 70 kDa (Cep70)	Cep70	616	1056.58	19.78	High	0	0.0002786	19.3	0.015	6096.2	8	H-2 Db
B22	MHC-DB	High	YSLGNTYTL	9		1	1	Q6IR34	GPSM1_MOUSE	G-protein-signaling modulator 1 (Activator of G-protein signaling 3)	Gpsm1 Ags3 C10a	673	1031.5	31.82	High	0	0.0006178	4.4	0.01	1512.8	2.5	H-2 Db
B22	MHC-DB	High	QGIKNSVTL	9		1	2	Q6IRU7	CEP78_MOUSE	Centrosomal protein of 78 kDa (Cep78)	Cep78	790	959.552	21.67	High	0.002	0.01476	89.5	0.06	2806.7	4.5	H-2 Db
B22	MHC-DB	High	AAVENLKNI	9		1	3	Q6KAR6	EXOC3_MOUSE	Exocyst complex component 3 (Exocyst complex component Sec6)	Exoc3 Sec6l1	755	971.552	29.08	High	0	0.0004763	88.8	0.06	4679.6	6.5	H-2 Db
Y3	MHC-DB	High	TAVQRVAGM	9		1	1	Q6KAR6	EXOC3_MOUSE	Exocyst complex component 3 (Exocyst complex component Sec6)	Exoc3 Sec6l1	755	932.498	35.78	High	0	3.33e-10	22948.6	8.5	533.8	1.1	H-2 Kb
B22	MHC-DB	High	YQLSNLYAI	9		1	1	Q6KAU4	MB12B_MOUSE	Multivesicular body subunit 12B (ESCRT-I complex subunit MVB12B) (Protein FAM125B)	Mvb12b Fam125b	317	1084.57	36.27	High	0	2.265e-05	4	0.01	2376.6	4	H-2 Db
Y3	MHC-DB	High	LSLLLQHL	8		1	2	Q6KCD5	NIPBL_MOUSE	Nipped-B-like protein (Delangin homolog) (SCC2 homolog)	Nipbl	2798	936.588	25.59	High	0.003	0.000932	15291.4	4.5	70.7	0.2	H-2 Kb
B22	MHC-DB	High	VALLNLENM	9		1	3	Q6NS46	RRP5_MOUSE	Protein RRP5 homolog (Apoptosis-linked gene 4 protein) (Programmed cell death protein 11)	Pdcd11 Alg4 Kiaa0185	1862	1016.54	42.37	High	0	1.929e-06	10.3	0.01	256.8	0.7	H-2 Db
B22	MHC-DB	High	VALLNLENM	9	1xOxidation [M9]	1	1	Q6NS46	RRP5_MOUSE	Protein RRP5 homolog (Apoptosis-linked gene 4 protein) (Programmed cell death protein 11)	Pdcd11 Alg4 Kiaa0185	1862	1032.54	16.76	High	0	0.0006331	10.3	0.01	256.8	0.7	H-2 Db
Y3	MHC-DB	High	VIVKFAQL	8		1	3	Q6NS46	RRP5_MOUSE	Protein RRP5 homolog (Apoptosis-linked gene 4 protein) (Programmed cell death protein 11)	Pdcd11 Alg4 Kiaa0185	1862	917.582	32.44	High	0.003	0.000932	26591.8	11	3	0.01	H-2 Kb
B22	MHC-DB	High	AAPVSGPRL	9		1	3	Q6NSQ7	LTV1_MOUSE	Protein LTV1 homolog	Ltv1	470	867.505	39.72	High	0	0.001254	3734.5	1	3135.1	4.5	H-2 Db
B22	MHC-DB	High	SAPGSPQEAM	10		1	3	Q6NSQ7	LTV1_MOUSE	Protein LTV1 homolog	Ltv1	470	974.425	42.28	High	0	8.509e-06	6056.3	1.6	19796.9	27	H-2 Db
B22	MHC-DB	High	KSLINKNEL	9		1	2	Q6NVF0	OCRL_MOUSE	Inositol polyphosphate 5-phosphatase OCRL-1 (EC 3.1.3.36)	Ocrl	900	1058.62	21.65	High	0	0.00313	64.1	0.04	2532.2	4	H-2 Db
B22	MHC-DB	High	AFLRELL	7		1	2	Q6NVF0	OCRL_MOUSE	Inositol polyphosphate 5-phosphatase OCRL-1 (EC 3.1.3.36)	Ocrl	900	861.519	22.07	High	0.006	0.0566	na	na	na	na	na
Y3	MHC-DB	Medium	AFLRELL	7		1	1	Q6NVF0	OCRL_MOUSE	Inositol polyphosphate 5-phosphatase OCRL-1 (EC 3.1.3.36)	Ocrl	900	861.519	17.02	Medium	0.011	0.02739	na	na	na	na	na
Y3	MHC-DB	High	VTVDFSKL	8		1	2	Q6NVF4	HELB_MOUSE	DNA helicase B (EC 3.6.4.12)	Helb	1074	908.509	30.79	High	0	9.98e-16	35578.9	21	15.3	0.05	H-2 Kb
B22	MHC-DB	Medium	SANASGLMAPL	11	1xOxidation [M8]	1	1	Q6NWW5	KIF24_MOUSE	Kinesin-like protein KIF24	Kif24	1356	1047.51	10.15	Medium	0.037	0.2316	3913.1	1	6485.1	8.5	H-2 Db
B22	MHC-DB	High	NMHQNIKYI	9		1	1	Q6NXH2	MANEA_MOUSE	Glycoprotein endo-alpha-1,2-mannosidase (Endo-alpha mannosidase) (Endomannosidase) (mEndo) (EC 3.2.1.130)	Manea	462	1160.59	15.46	High	0	0.0007702	73.2	0.05	14380.2	19	H-2 Db
B22	MHC-DB	High	KQVKNGPSL	9		1	1	Q6NXI6	RPRD2_MOUSE	Regulation of nuclear pre-mRNA domain-containing protein 2	Rprd2 Kiaa0460	1469	970.568	14.2	High	0.004	0.04049	405.9	0.2	8941.8	12	H-2 Db
Y3	MHC-DB	High	AWYQKQELL	9		1	1	Q6NXY1	TBC31_MOUSE	TBC1 domain family member 31 (Protein 4-B-3) (WD repeat-containing protein 67)	Tbc1d31 Wdr67	996	1178.62	34.26	High	0	6.48e-10	13121.1	4	259.4	0.7	H-2 Kb
Y3	MHC-DB	High	GIMRFVNI	8		1	2	Q6NXY1	TBC31_MOUSE	TBC1 domain family member 31 (Protein 4-B-3) (WD repeat-containing protein 67)	Tbc1d31 Wdr67	996	949.529	24.34	High	0.003	0.003654	30550.4	15	263.4	0.7	H-2 Kb
Y3	MHC-DB	High	KVLRFLNV	8		1	1	Q6NXY1	TBC31_MOUSE	TBC1 domain family member 31 (Protein 4-B-3) (WD repeat-containing protein 67)	Tbc1d31 Wdr67	996	988.63	16.67	High	0.009	0.02739	32959.4	17	32.8	0.1	H-2 Kb
B22	MHC-DB	High	SAIRNGTDM	9		1	2	Q6NZQ0	CC189_MOUSE	Coiled-coil domain-containing protein 189	Ccdc189 Gm166	333	964.452	49.6	High	0	0.0001929	5.1	0.01	3523.3	5	H-2 Db
B22	MHC-DB	High	SAIRNGTDM	9	1xOxidation [M9]	1	1	Q6NZQ0	CC189_MOUSE	Coiled-coil domain-containing protein 189	Ccdc189 Gm166	333	980.447	21.8	High	0	0.0003401	5.1	0.01	3523.3	5	H-2 Db
B22	MHC-DB	High	FMVEKGPTL	9	1xOxidation [M2]	1	2	Q6P073	UB2J2_MOUSE	Ubiquitin-conjugating enzyme E2 J2 (EC 2.3.2.23) (Non-canonical ubiquitin-conjugating enzyme 2) (NCUBE-2)	Ube2j2 Ncube2	259	1037.53	28.45	High	0	0.005008	1447	0.5	1487.4	2.5	H-2 Db
B22	MHC-DB	High	FMVEKGPTL	9		1	3	Q6P073	UB2J2_MOUSE	Ubiquitin-conjugating enzyme E2 J2 (EC 2.3.2.23) (Non-canonical ubiquitin-conjugating enzyme 2) (NCUBE-2)	Ube2j2 Ncube2	259	1021.54	23.42	High	0	0.0004898	1447	0.5	1487.4	2.5	H-2 Db
Y3	MHC-DB	High	FMVEKGPTL	9		1	1	Q6P073	UB2J2_MOUSE	Ubiquitin-conjugating enzyme E2 J2 (EC 2.3.2.23) (Non-canonical ubiquitin-conjugating enzyme 2) (NCUBE-2)	Ube2j2 Ncube2	259	1021.54	21.59	High	0	0.000932	1447	0.5	1487.4	2.5	H-2 Db
B22	MHC-DB	High	RQLENTEHM	9		1	2	Q6P1D7	SLX4_MOUSE	Structure-specific endonuclease subunit SLX4 (BTB/POZ domain-containing protein 12)	Slx4 Btbd12	1565	1157.54	14.25	High	0	0.00262	28.7	0.02	13091.8	17	H-2 Db
B22	MHC-DB	Medium	ISTVVNEAAMK	11	1xOxidation [M10]	1	2	Q6P1G0	HEAT6_MOUSE	HEAT repeat-containing protein 6	Heatr6	1184	1178.61	13.65	Medium	0.041	0.2448	3836.4	1	9640.3	13	H-2 Db
B22	MHC-DB	High	AGLMQGLPAI	10	1xOxidation [M4]	1	2	Q6P1G2	KDM2B_MOUSE	Lysine-specific demethylase 2B (EC 1.14.11.27) (F-box and leucine-rich repeat protein 10) (F-box protein FBL10) (F-box/LRR-repeat protein 10) (JmjC domain-containing histone demethylation protein 1B) ([Histone-H3]-lysine-36 demethylase 1B)	Kdm2b Fbl10 Fbxl10 Jhdm1b Kiaa3014	1309	986.534	19.25	High	0.003	0.03865	6433.5	1.7	17385.6	23	H-2 Db
B22	MHC-DB	Medium	EVTMDAMMARL	11	1xOxidation [M7]	1	1	Q6P1H6	ANKL2_MOUSE	Ankyrin repeat and LEM domain-containing protein 2 (LEM domain-containing protein 4)	Ankle2 D5Ertd585e Kiaa0692 Lem4	964	1283.58	15.84	Medium	0.028	0.19	29500.2	13	940.8	1.7	H-2 Kb
B22	MHC-DB	Medium	KSVDPENNPTL	11		1	4	Q6P2B1	TNPO3_MOUSE	Transportin-3	Tnpo3	923	1213.61	14.45	Medium	0.032	0.2083	3653.9	1	19904.3	27	H-2 Db
B22	MHC-DB	High	YAIENVETNL	10		1	2	Q6P2B1	TNPO3_MOUSE	Transportin-3	Tnpo3	923	1165.57	39.37	High	0	1.725e-05	5.5	0.01	6315.4	8.5	H-2 Db
Y3	MHC-DB	High	AFFKTLSNM	9		1	1	Q6P2K6	P4R3A_MOUSE	Serine/threonine-protein phosphatase 4 regulatory subunit 3A (SMEK homolog 1)	Ppp4r3a Kiaa2010 Pp4r3a Smek1	820	1058.53	11.06	High	0	4.345e-05	22709	8	201.8	0.5	H-2 Kb
Y3	MHC-DB	Medium	KTHTCQVVI	9		1	2	Q6P3Y5	Z280C_MOUSE	Zinc finger protein 280C (Suppressor of hairy wing homolog 3)	Znf280c Kiaa1584 Suhw3 Zfp280c	742	1028.56	11.46	Medium	0.024	0.1211	6851.1	1.8	7366.7	9.5	H-2 Db
Y3	MHC-DB	Medium	VTFLNTVV	8		1	1	Q6P4T0	ATG2A_MOUSE	Autophagy-related protein 2 homolog A	Atg2a Kiaa0404	1914	892.514	26.11	Medium	0.019	0.09212	8687.3	2.5	969.5	1.8	H-2 Kb
Y3	MHC-DB	High	VILPLISKL	9		1	7	Q6P4T1	SNX19_MOUSE	Sorting nexin-19	Snx19 Kiaa0254	997	995.686	32.93	High	0	0.000932	21773.8	7.5	265.8	0.7	H-2 Kb
Y3	MHC-DB	High	SSYVHSNL	8		1	2	Q6P4T1	SNX19_MOUSE	Sorting nexin-19	Snx19 Kiaa0254	997	906.432	33.18	High	0	5.112e-05	16287.4	5	3.2	0.01	H-2 Kb
B22	MHC-DB	High	SSLSNAKDV	9		1	3	Q6P4T2	U520_MOUSE	U5 small nuclear ribonucleoprotein 200 kDa helicase (EC 3.6.4.13) (BRR2 homolog) (U5 snRNP-specific 200 kDa protein) (U5-200KD)	Snrnp200 Kiaa0788	2136	920.468	43.75	High	0	8.68e-06	310.4	0.15	6644.1	8.5	H-2 Db
Y3	MHC-DB	High	KNFPFERL	8		1	2	Q6P4T2	U520_MOUSE	U5 small nuclear ribonucleoprotein 200 kDa helicase (EC 3.6.4.13) (BRR2 homolog) (U5 snRNP-specific 200 kDa protein) (U5-200KD)	Snrnp200 Kiaa0788	2136	1050.57	32.35	High	0	0.000932	33254.2	18	11.2	0.04	H-2 Kb
B22	MHC-DB	High	VAPLNLGMI	9		1	4	Q6P4T2	U520_MOUSE	U5 small nuclear ribonucleoprotein 200 kDa helicase (EC 3.6.4.13) (BRR2 homolog) (U5 snRNP-specific 200 kDa protein) (U5-200KD)	Snrnp200 Kiaa0788	2136	927.533	51.47	High	0	7.579e-06	34.3	0.025	449	1	H-2 Db
B22	MHC-DB	High	VAPLNLGMI	9	1xOxidation [M8]	1	3	Q6P4T2	U520_MOUSE	U5 small nuclear ribonucleoprotein 200 kDa helicase (EC 3.6.4.13) (BRR2 homolog) (U5 snRNP-specific 200 kDa protein) (U5-200KD)	Snrnp200 Kiaa0788	2136	943.528	37.73	High	0	0.0004304	34.3	0.025	449	1	H-2 Db
Y3	MHC-DB	High	TNVTFSKV	8		1	1	Q6P5B0	RRP12_MOUSE	RRP12-like protein	Rrp12 Kiaa0690	1295	895.488	24.49	High	0.002	0.000932	41452.1	34	111.7	0.3	H-2 Kb
Y3	MHC-DB	Medium	VAASFKGL	8		1	2	Q6P5B0	RRP12_MOUSE	RRP12-like protein	Rrp12 Kiaa0690	1295	792.461	24.1	Medium	0.015	0.02917	37248.7	24	36.5	0.125	H-2 Kb
B22	MHC-DB	High	FANSDYLAL	9		1	2	Q6P5D3	DHX57_MOUSE	Putative ATP-dependent RNA helicase DHX57 (EC 3.6.4.13) (DEAH box protein 57)	Dhx57	1388	1013.49	18.82	High	0	0.00223	344.1	0.175	1745.5	3	H-2 Db
B22	MHC-DB	High	KGVYNKSTI	9		1	3	Q6P5D8	SMHD1_MOUSE	Structural maintenance of chromosomes flexible hinge domain-containing protein 1	Smchd1 Kiaa0650	2007	1009.57	35.28	High	0	6.798e-05	123.2	0.08	7761.7	10	H-2 Db
Y3	MHC-DB	High	KGVYNKSTI	9		1	1	Q6P5D8	SMHD1_MOUSE	Structural maintenance of chromosomes flexible hinge domain-containing protein 1	Smchd1 Kiaa0650	2007	1009.57	25.99	High	0	0.000932	123.2	0.08	7761.7	10	H-2 Db
B22	MHC-DB	High	VQPEHIQYL	9		1	3	Q6P5D8	SMHD1_MOUSE	Structural maintenance of chromosomes flexible hinge domain-containing protein 1	Smchd1 Kiaa0650	2007	1126.59	33.2	High	0	0.0001816	2321.1	0.7	554.5	1.2	H-2 Db
Y3	MHC-DB	High	STLIYKFL	8		1	1	Q6P5F9	XPO1_MOUSE	Exportin-1 (Exp1) (Chromosome region maintenance 1 protein homolog)	Xpo1 Crm1	1071	984.576	24.1	High	0	1.2e-07	21351.5	7.5	22.5	0.07	H-2 Kb
Y3	MHC-DB	High	TILEFSQNM	9	1xOxidation [M9]	1	2	Q6P5F9	XPO1_MOUSE	Exportin-1 (Exp1) (Chromosome region maintenance 1 protein homolog)	Xpo1 Crm1	1071	1098.51	56	High	0	9.98e-16	27389.9	12	34.2	0.1	H-2 Kb
Y3	MHC-DB	High	TILEFSQNM	9		1	3	Q6P5F9	XPO1_MOUSE	Exportin-1 (Exp1) (Chromosome region maintenance 1 protein homolog)	Xpo1 Crm1	1071	1082.52	51.81	High	0	8.55e-08	27389.9	12	34.2	0.1	H-2 Kb
Y3	MHC-DB	High	LIYKFLNV	8		1	3	Q6P5F9	XPO1_MOUSE	Exportin-1 (Exp1) (Chromosome region maintenance 1 protein homolog)	Xpo1 Crm1	1071	1009.61	22.28	High	0.003	0.003654	33117.1	17	5.8	0.015	H-2 Kb
Y3	MHC-DB	High	ITYAWTRL	8		1	1	Q6P8H8	ALG8_MOUSE	Probable dolichyl pyrophosphate Glc1Man9GlcNAc2 alpha-1,3-glucosyltransferase (EC 2.4.1.265) (Asparagine-linked glycosylation protein 8 homolog) (Dol-P-Glc:Glc(1)Man(9)GlcNAc(2)-PP-dolichyl alpha-1,3-glucosyltransferase) (Dolichyl-P-Glc:Glc1Man9GlcNAc2-PP-dolichyl glucosyltransferase)	Alg8 Gm1089	526	1023.56	26.46	High	0	1.33e-12	25327.2	10	3.9	0.01	H-2 Kb
B22	MHC-DB	High	AVVTNAMII	9		1	1	Q6P9J9	ANO6_MOUSE	Anoctamin-6 (Small-conductance calcium-activated nonselective cation channel) (SCAN channel) (Transmembrane protein 16F)	Ano6 Tmem16f	911	931.528	27.34	High	0	5.352e-05	230.4	0.125	6271.2	8.5	H-2 Db
B22	MHC-DB	High	VGLYLREHI	9		1	1	Q6P9L6	KIF15_MOUSE	Kinesin-like protein KIF15 (Kinesin-like protein 2) (Kinesin-like protein 7)	Kif15 Klp2 Knsl7	1387	1099.63	15.58	High	0	0.001061	3211.8	0.9	1452.3	2.5	H-2 Db
B22	MHC-DB	High	AAVANQHSSFV	11		1	2	Q6P9P6	KIF11_MOUSE	Kinesin-like protein KIF11 (Kinesin-related motor protein Eg5)	Kif11	1052	1130.56	41.3	High	0	0.0002136	75	0.05	17270	23	H-2 Db
Y3	MHC-DB	High	KTYTFDMV	8		1	1	Q6P9P6	KIF11_MOUSE	Kinesin-like protein KIF11 (Kinesin-related motor protein Eg5)	Kif11	1052	1004.48	11.42	High	0	2.04e-10	28803.5	13	28.3	0.09	H-2 Kb
B22	MHC-DB	High	AALLNFDEF	9		1	2	Q6P9Q4	FHOD1_MOUSE	FH1/FH2 domain-containing protein 1 (Formin homolog overexpressed in spleen 1) (FHOS) (Formin homology 2 domain-containing protein 1)	Fhod1 Fhos1	1197	1039.51	34.21	High	0	2.694e-05	15.1	0.01	658.5	1.3	H-2 Db
B22	MHC-DB	High	YSPTGKEFV	9		1	3	Q6PAC3	DCA13_MOUSE	DDB1- and CUL4-associated factor 13 (WD repeat and SOF domain-containing protein 1)	Dcaf13 Gm83 Wdsof1	445	1027.51	25.39	High	0	0.0001814	675.2	0.3	23335.7	33	H-2 Db
Y3	MHC-DB	High	YSPTGKEFV	9		1	2	Q6PAC3	DCA13_MOUSE	DDB1- and CUL4-associated factor 13 (WD repeat and SOF domain-containing protein 1)	Dcaf13 Gm83 Wdsof1	445	1027.51	18.74	High	0.002	0.000932	675.2	0.3	23335.7	33	H-2 Db
Y3	MHC-DB	High	SSVKFNPV	8		1	3	Q6PAC3	DCA13_MOUSE	DDB1- and CUL4-associated factor 13 (WD repeat and SOF domain-containing protein 1)	Dcaf13 Gm83 Wdsof1	445	877.478	29.82	High	0.003	0.003654	13432.5	4	12.2	0.04	H-2 Kb
B22	MHC-DB	High	TSMYQKCTTV	10		1	2	Q6PAL8	DEN5A_MOUSE	DENN domain-containing protein 5A (Rab6-interacting protein 1) (Rab6IP1)	Dennd5a Rab6ip1	1287	1161.53	21.62	High	0.001	0.007691	3142.6	0.9	931.3	1.7	H-2 Db
Y3	MHC-DB	High	TSMYQKCTTV	10		1	2	Q6PAL8	DEN5A_MOUSE	DENN domain-containing protein 5A (Rab6-interacting protein 1) (Rab6IP1)	Dennd5a Rab6ip1	1287	1161.53	17.63	High	0.003	0.000932	3142.6	0.9	931.3	1.7	H-2 Db
B22	MHC-DB	High	RALENPDTA	9		1	2	Q6PB44	PTN23_MOUSE	Tyrosine-protein phosphatase non-receptor type 23 (EC 3.1.3.48)	Ptpn23 Kiaa1471	1692	986.49	20.09	High	0.003	0.03415	30.2	0.02	26259	39	H-2 Db
B22	MHC-DB	High	RALENPDTASL	11		1	2	Q6PB44	PTN23_MOUSE	Tyrosine-protein phosphatase non-receptor type 23 (EC 3.1.3.48)	Ptpn23 Kiaa1471	1692	1186.61	38.22	High	0	0.0001181	85.2	0.06	13579	18	H-2 Db
Y3	MHC-DB	High	KIYYFAAV	8		2	1	Q6PB44	PTN23_MOUSE	Tyrosine-protein phosphatase non-receptor type 23 (EC 3.1.3.48)	Ptpn23 Kiaa1471	1692	974.535	18.12	High	0	0.000932	29328.6	13	3.3	0.01	H-2 Kb
B22	MHC-DB	High	AAIENIEHL	9		1	4	Q6PB66	LPPRC_MOUSE	Leucine-rich PPR motif-containing protein, mitochondrial (130 kDa leucine-rich protein) (LRP 130) (mLRP130)	Lrpprc Lrp130	1392	1009.53	42.88	High	0	0.000664	6.9	0.01	2047.4	3.5	H-2 Db
Y3	MHC-DB	High	AAIENIEHL	9		1	1	Q6PB66	LPPRC_MOUSE	Leucine-rich PPR motif-containing protein, mitochondrial (130 kDa leucine-rich protein) (LRP 130) (mLRP130)	Lrpprc Lrp130	1392	1009.53	33.44	High	0	9.98e-16	6.9	0.01	2047.4	3.5	H-2 Db
B22	MHC-DB	High	STLVHKFFL	9		1	5	Q6PCL9	PAPOG_MOUSE	Poly(A) polymerase gamma (PAP-gamma) (EC 2.7.7.19) (Polynucleotide adenylyltransferase gamma) (SRP RNA 3'-adenylating enzyme) (Signal recognition particle RNA-adenylating enzyme) (SRP RNA-adenylating enzyme)	Papolg	739	1091.62	36.6	High	0	6.746e-06	892.7	0.4	285.8	0.7	H-2 Db
B22	MHC-DB	High	TGVVNNNEM	9		1	3	Q6PCN7	HLTF_MOUSE	Helicase-like transcription factor (EC 3.6.4.-) (EC 6.3.2.-) (P113) (SWI/SNF-related matrix-associated actin-dependent regulator of chromatin subfamily A member 3) (Sucrose nonfermenting protein 2-like 3) (TNF-response element-binding protein)	Hltf Smarca3 Snf2l3 Zbu1	1003	977.436	44.6	High	0	8.891e-05	120.1	0.08	12782.4	16	H-2 Db
B22	MHC-DB	High	TGVVNNNEM	9	1xOxidation [M9]	1	2	Q6PCN7	HLTF_MOUSE	Helicase-like transcription factor (EC 3.6.4.-) (EC 6.3.2.-) (P113) (SWI/SNF-related matrix-associated actin-dependent regulator of chromatin subfamily A member 3) (Sucrose nonfermenting protein 2-like 3) (TNF-response element-binding protein)	Hltf Smarca3 Snf2l3 Zbu1	1003	993.431	30.36	High	0	0.0001898	120.1	0.08	12782.4	16	H-2 Db
Y3	MHC-DB	High	SGFVFTRL	8		1	3	Q6PCN7	HLTF_MOUSE	Helicase-like transcription factor (EC 3.6.4.-) (EC 6.3.2.-) (P113) (SWI/SNF-related matrix-associated actin-dependent regulator of chromatin subfamily A member 3) (Sucrose nonfermenting protein 2-like 3) (TNF-response element-binding protein)	Hltf Smarca3 Snf2l3 Zbu1	1003	926.509	53.74	High	0	1.471e-05	16923.7	5.5	2.5	0.01	H-2 Kb
B22	MHC-DB	High	FVLENFSTL	9		1	1	Q6PCX9	TRI37_MOUSE	E3 ubiquitin-protein ligase TRIM37 (EC 6.3.2.-) (Tripartite motif-containing protein 37)	Trim37 Kiaa0898	961	1069.56	35	High	0	5.87e-07	20.9	0.015	86.6	0.25	H-2 Db
Y3	MHC-DB	Medium	LSVQTNEAI	9		1	1	Q6PD19	CJ076_MOUSE	UPF0668 protein C10orf76 homolog		689	974.515	15.48	Medium	0.028	0.1211	6559.2	1.7	15345.9	20	H-2 Db
B22	MHC-DB	High	SSVQNYFHL	9		1	1	Q6PD31	TRAK1_MOUSE	Trafficking kinesin-binding protein 1	Trak1	939	1094.53	32.59	High	0	0.0001848	10.8	0.01	17.2	0.05	H-2 Db
Y3	MHC-DB	High	VNVRFTGV	8		1	1	Q6PDI6	FA63B_MOUSE	Protein FAM63B	Fam63b Kiaa1164	601	891.505	36.03	High	0	1.33e-10	40571.3	31	8.5	0.025	H-2 Kb
Y3	MHC-DB	High	ANINFPNL	8		1	1	Q6PDK2	KMT2D_MOUSE	Histone-lysine N-methyltransferase 2D (Lysine N-methyltransferase 2D) (EC 2.1.1.43) (ALL1-related protein) (Myeloid/lymphoid or mixed-lineage leukemia protein 2)	Kmt2d Mll2 Mll4	5588	902.473	24.41	High	0	3.26e-07	12015.3	3.5	6.5	0.02	H-2 Kb
Y3	MHC-DB	Medium	VNLTNLNL	8		1	1	Q6PFD9	NUP98_MOUSE	Nuclear pore complex protein Nup98-Nup96 [Cleaved into: Nuclear pore complex protein Nup98 (98 kDa nucleoporin) (Nucleoporin Nup98) (Nup98); Nuclear pore complex protein Nup96 (96 kDa nucleoporin) (Nucleoporin Nup96) (Nup96)]	Nup98	1816	900.515	12.9	Medium	0.023	0.09212	7677.9	2	247.3	0.6	H-2 Kb
B22	MHC-DB	High	IINENYDYL	9		1	3	Q6PFD9	NUP98_MOUSE	Nuclear pore complex protein Nup98-Nup96 [Cleaved into: Nuclear pore complex protein Nup98 (98 kDa nucleoporin) (Nucleoporin Nup98) (Nup98); Nuclear pore complex protein Nup96 (96 kDa nucleoporin) (Nucleoporin Nup96) (Nup96)]	Nup98	1816	1156.55	20.58	High	0	0.0006314	118.4	0.07	277	0.7	H-2 Db
Y3	MHC-DB	High	RALNYTHL	8		1	1	Q6PFD9	NUP98_MOUSE	Nuclear pore complex protein Nup98-Nup96 [Cleaved into: Nuclear pore complex protein Nup98 (98 kDa nucleoporin) (Nucleoporin Nup98) (Nup98); Nuclear pore complex protein Nup96 (96 kDa nucleoporin) (Nucleoporin Nup96) (Nup96)]	Nup98	1816	987.537	10.36	High	0	0.000932	513.2	0.25	8.8	0.025	H-2 Kb
Y3	MHC-DB	High	VSFFFQNI	8		1	2	Q6PFE3	RA54B_MOUSE	DNA repair and recombination protein RAD54B (EC 3.6.4.-) (RAD54 homolog B)	Rad54b	886	1001.51	22.86	High	0	7.1e-15	8392.5	2.5	2.8	0.01	H-2 Kb
Y3	MHC-DB	High	VVYPFPTF	8		1	2	Q6PFH3	DCA15_MOUSE	DDB1- and CUL4-associated factor 15	Dcaf15	600	969.508	29.53	High	0.001	0.000932	23470.4	8.5	18.2	0.06	H-2 Kb
B22	MHC-DB	High	AANVNAKDM	9		1	2	Q6PFX9	TNKS1_MOUSE	Tankyrase-1 (TANK1) (EC 2.4.2.30) (ADP-ribosyltransferase diphtheria toxin-like 5) (ARTD5) (TRF1-interacting ankyrin-related ADP-ribose polymerase 1) (Tankyrase I)	Tnks Tnks1	1320	933.446	37.41	High	0	0.0001684	281.1	0.15	14820	19	H-2 Db
B22	MHC-DB	High	LNFITFSML	9	1xOxidation [M8]	1	1	Q6PHB0	I20RA_MOUSE	Interleukin-20 receptor subunit alpha (IL-20 receptor subunit alpha) (IL-20R-alpha) (IL-20RA) (IL-20R1)	Il20ra	546	1101.56	12.98	High	0.008	0.06679	16106.2	5	17.9	0.05	H-2 Kb
B22	MHC-DB	Medium	SALRTLGKL	9		1	1	Q6PHZ5	RB15B_MOUSE	Putative RNA-binding protein 15B (RNA-binding motif protein 15B)	Rbm15b	887	958.604	17.66	Medium	0.015	0.1218	3935.1	1.1	318.3	0.8	H-2 Kb
B22	MHC-DB	Medium	VAMAFPPVF	9	1xOxidation [M3]	1	1	Q6PI62	GP173_MOUSE	Probable G-protein coupled receptor 173 (Super conserved receptor expressed in brain 3)	Gpr173 Sreb3	373	994.507	10.93	Medium	0.049	0.2899	7105.6	1.8	439.6	1	H-2 Kb
B22	MHC-DB	High	VSPVSKTAM	9		1	2	Q6PIJ4	NFRKB_MOUSE	Nuclear factor related to kappa-B-binding protein (DNA-binding protein R kappa-B)	Nfrkb	1296	919.492	26.81	High	0	0.0007954	344.2	0.175	1067	1.9	H-2 Db
Y3	MHC-DB	High	TAPQYYRL	8		1	3	Q6PJN8	DALD3_MOUSE	DALR anticodon-binding domain-containing protein 3	Dalrd3	538	1011.53	29.78	High	0	3.739e-06	14536.8	4.5	11.9	0.04	H-2 Kb
B22	MHC-DB	High	KQLVNKEHL	9		1	2	Q6PR54	RIF1_MOUSE	Telomere-associated protein RIF1 (Rap1-interacting factor 1 homolog) (mRif1)	Rif1	2419	1108.65	27.98	High	0	0.000504	41.6	0.03	6199.1	8	H-2 Db
B22	MHC-DB	High	SAVVDFEAL	9		1	1	Q6PR54	RIF1_MOUSE	Telomere-associated protein RIF1 (Rap1-interacting factor 1 homolog) (mRif1)	Rif1	2419	950.483	11.96	High	0.001	0.00808	69.5	0.05	811	1.5	H-2 Db
B22	MHC-DB	High	VLQGYTPI	8		1	1	Q6Q473	CLA4A_MOUSE	Calcium-activated chloride channel regulator 4A (EC 3.4.-.-) (Calcium-activated chloride channel regulator 6) (mClca6) [Cleaved into: Calcium-activated chloride channel regulator 4A, 110 kDa form; Calcium-activated chloride channel regulator 4A, 30 kDa form]	Clca4a Clca6	924	890.498	14.3	High	0.006	0.05818	4721	1.3	1114	2	H-2 Db
B22	MHC-DB	High	LSPINHNTL	9		1	2	Q6QI06	RICTR_MOUSE	Rapamycin-insensitive companion of mTOR (AVO3 homolog) (mAVO3) (Protein pianissimo)	Rictor Kiaa1999	1708	1008.55	28.56	High	0	6.03e-05	24.9	0.015	647.9	1.3	H-2 Db
B22	MHC-DB	High	LSNNNLTTL	9		1	1	Q6RKD8	FLRT1_MOUSE	Leucine-rich repeat transmembrane protein FLRT1 (Fibronectin leucine rich transmembrane protein 1)	Flrt1	674	989.526	11.04	High	0.006	0.06002	37.5	0.025	1474.4	2.5	H-2 Db
B22	MHC-DB	High	MSIENQEEL	9		1	2	Q6RT24	CENPE_MOUSE	Centromere-associated protein E (Centromere protein E) (CENP-E) (Kinesin superfamily protein 10) (KIF10) (Motor domain of KIF10)	Cenpe	2474	1092.49	28.73	High	0	0.0002643	10.7	0.01	3216.4	5	H-2 Db
B22	MHC-DB	High	VTLKNEVYI	9		1	1	Q6V595	KLHL6_MOUSE	Kelch-like protein 6	Klhl6	619	1078.61	29.44	High	0	9.544e-05	32.7	0.025	1024.3	1.8	H-2 Db
B22	MHC-DB	Medium	AALSAQYTV	9		1	1	Q6VGS5	DAPLE_MOUSE	Protein Daple (Coiled-coil domain-containing protein 88C) (Dvl-associating protein with a high frequency of leucine residues)	Ccdc88c Daple	2009	923.483	12.41	Medium	0.018	0.1389	313.9	0.15	3832.3	5.5	H-2 Db
Y3	MHC-DB	Medium	NLPNVLMI	8		1	1	Q6VGS5	DAPLE_MOUSE	Protein Daple (Coiled-coil domain-containing protein 88C) (Dvl-associating protein with a high frequency of leucine residues)	Ccdc88c Daple	2009	913.518	11.06	Medium	0.016	0.03208	28292.9	12	25775.7	38	H-2 Db
Y3	MHC-DB	Medium	FGGLVSANLI	10		1	2	Q6VNB8	WDFY3_MOUSE	WD repeat and FYVE domain-containing protein 3 (Beach domain, WD repeat and FYVE domain-containing protein 1) (BWF1)	Wdfy3	3508	990.562	19.78	Medium	0.027	0.1211	2789.4	0.8	15153.7	20	H-2 Db
B22	MHC-DB	High	SLPTNLIHL	9		1	3	Q6WKZ8	UBR2_MOUSE	E3 ubiquitin-protein ligase UBR2 (EC 6.3.2.-) (N-recognin-2) (Ubiquitin-protein ligase E3-alpha-2) (Ubiquitin-protein ligase E3-alpha-II)	Ubr2 Kiaa0349	1755	1007.59	31.87	High	0	0.0005956	238.7	0.125	1094.4	1.9	H-2 Db
Y3	MHC-DB	High	QTFTFTQKI	9		1	1	Q6WKZ8	UBR2_MOUSE	E3 ubiquitin-protein ligase UBR2 (EC 6.3.2.-) (N-recognin-2) (Ubiquitin-protein ligase E3-alpha-2) (Ubiquitin-protein ligase E3-alpha-II)	Ubr2 Kiaa0349	1755	1113.59	14.35	High	0	1.89e-15	22014.9	8	127.8	0.4	H-2 Kb
Y3	MHC-DB	High	VAYKFPEL	8		1	4	Q6WKZ8	UBR2_MOUSE	E3 ubiquitin-protein ligase UBR2 (EC 6.3.2.-) (N-recognin-2) (Ubiquitin-protein ligase E3-alpha-2) (Ubiquitin-protein ligase E3-alpha-II)	Ubr2 Kiaa0349	1755	966.53	32.52	High	0	9.98e-16	8158	2.5	2.6	0.01	H-2 Kb
Y3	MHC-DB	High	VAYKFPELL	9		1	3	Q6WKZ8	UBR2_MOUSE	E3 ubiquitin-protein ligase UBR2 (EC 6.3.2.-) (N-recognin-2) (Ubiquitin-protein ligase E3-alpha-2) (Ubiquitin-protein ligase E3-alpha-II)	Ubr2 Kiaa0349	1755	1079.61	47.67	High	0	9.98e-16	1984	0.6	9.5	0.03	H-2 Kb
B22	MHC-DB	High	QGPFNNQEM	9		1	1	Q6Y7W8	PERQ2_MOUSE	PERQ amino acid-rich with GYF domain-containing protein 2 (GRB10-interacting GYF protein 2) (Trinucleotide repeat-containing gene 15 protein)	Gigyf2 Kiaa0642 Perq2 Tnrc15	1291	1064.45	14.58	High	0.003	0.03229	1298.1	0.5	14728.2	19	H-2 Db
Y3	MHC-DB	Medium	VIRVSFSNLF	10		1	1	Q6ZPG2	WDR90_MOUSE	WD repeat-containing protein 90	Wdr90 Kiaa1924	1874	1181.67	10.19	Medium	0.027	0.1211	38136.1	25	153.4	0.4	H-2 Kb
B22	MHC-DB	High	SSPSSRETL	9		1	1	Q6ZPS2	CRNS1_MOUSE	Carnosine synthase 1 (EC 6.3.2.11) (ATP-grasp domain-containing protein 1)	Carns1 Atpgd1 Kiaa1394	827	963.474	12.7	High	0.003	0.0287	138.7	0.08	3382.3	5	H-2 Db
Y3	MHC-DB	High	KNIRFPLM	8	1xOxidation [M8]	1	5	Q6ZPT1	KLHL9_MOUSE	Kelch-like protein 9	Klhl9 Kiaa1354	617	1034.58	40.24	High	0	9.98e-16	26657.2	11	35.4	0.125	H-2 Kb
Y3	MHC-DB	High	KNIRFPLM	8		1	4	Q6ZPT1	KLHL9_MOUSE	Kelch-like protein 9	Klhl9 Kiaa1354	617	1018.59	26.65	High	0.003	0.0009604	26657.2	11	35.4	0.125	H-2 Kb
Y3	MHC-DB	High	SALKYYQL	8		1	2	Q6ZPU9	KBP_MOUSE	KIF1-binding protein	Kif1bp Kbp Kiaa1279	617	985.535	40.99	High	0	1.962e-05	9378.9	2.5	6.4	0.015	H-2 Kb
B22	MHC-DB	High	SHLINHVNI	9		1	1	Q6ZPY2	SMG5_MOUSE	Protein SMG5 (EST1-like protein B) (SMG-5 homolog)	Smg5 Est1b Kiaa1089	1017	1046.57	44.21	High	0	6.682e-05	575.9	0.25	901.5	1.7	H-2 Db
B22	MHC-DB	High	LSIHNGPSV	9		1	2	Q6ZPY5	ZN507_MOUSE	Zinc finger protein 507	Znf507 Kiaa1084 Zfp507	941	923.495	42.3	High	0	0.0002288	326.5	0.15	4027	5.5	H-2 Db
B22	MHC-DB	High	RTPENHENL	9		1	2	Q6ZPY7	KDM3B_MOUSE	Lysine-specific demethylase 3B (EC 1.14.11.-) (JmjC domain-containing histone demethylation protein 2B) (Jumonji domain-containing protein 1B)	Kdm3b Jhdm2b Jmjd1b Kiaa1082	1562	1109.53	14.09	High	0.002	0.02013	955.4	0.4	2261.7	3.5	H-2 Db
B22	MHC-DB	High	NAIENSSSKV	10		1	2	Q6ZQ06	CE162_MOUSE	Centrosomal protein of 162 kDa (Cep162) (Protein QN1 homolog)	Cep162 Kiaa1009 Qn1	1403	1048.53	18.92	High	0.009	0.07219	626	0.25	19755.2	27	H-2 Db
Y3	MHC-DB	Medium	NAIENSSSKV	10		1	3	Q6ZQ06	CE162_MOUSE	Centrosomal protein of 162 kDa (Cep162) (Protein QN1 homolog)	Cep162 Kiaa1009 Qn1	1403	1048.53	20.8	Medium	0.027	0.1211	626	0.25	19755.2	27	H-2 Db
Y3	MHC-DB	High	SQQLYRHI	8		2	2	Q6ZQ18	EFR3B_MOUSE	Protein EFR3 homolog B	Efr3b Kiaa0953	817	1044.56	19.06	High	0	1.6e-07	19143.1	6.5	459.7	1	H-2 Kb
B22	MHC-DB	High	SSIGLKTVI	9		1	1	Q6ZQ38	CAND1_MOUSE	Cullin-associated NEDD8-dissociated protein 1 (Cullin-associated and neddylation-dissociated protein 1) (p120 CAND1)	Cand1 D10Ertd516e Kiaa0829	1230	917.567	15.01	High	0.004	0.04019	745.1	0.3	4218.3	6	H-2 Db
Y3	MHC-DB	High	VSPALIARF	9		1	2	Q6ZQ38	CAND1_MOUSE	Cullin-associated NEDD8-dissociated protein 1 (Cullin-associated and neddylation-dissociated protein 1) (p120 CAND1)	Cand1 D10Ertd516e Kiaa0829	1230	973.583	24.71	High	0	9.98e-16	19203.7	6.5	239.1	0.6	H-2 Kb
B22	MHC-DB	High	YQVENIVDTL	10		1	1	Q6ZQ73	CAND2_MOUSE	Cullin-associated NEDD8-dissociated protein 2 (Cullin-associated and neddylation-dissociated protein 2) (TBP-interacting protein of 120 kDa B) (TBP-interacting protein 120B) (p120 CAND2)	Cand2 Kiaa0667 Tip120b	1235	1193.6	23.27	High	0	1.646e-05	14.8	0.01	19708.6	27	H-2 Db
B22	MHC-DB	High	SAVHNKPSL	9		1	1	Q6ZQ73	CAND2_MOUSE	Cullin-associated NEDD8-dissociated protein 2 (Cullin-associated and neddylation-dissociated protein 2) (TBP-interacting protein of 120 kDa B) (TBP-interacting protein 120B) (p120 CAND2)	Cand2 Kiaa0667 Tip120b	1235	952.521	17.89	High	0	0.002257	94.9	0.06	2081.2	3.5	H-2 Db
Y3	MHC-DB	High	TAPVYNQV	8		1	2	Q6ZQ73	CAND2_MOUSE	Cullin-associated NEDD8-dissociated protein 2 (Cullin-associated and neddylation-dissociated protein 2) (TBP-interacting protein of 120 kDa B) (TBP-interacting protein 120B) (p120 CAND2)	Cand2 Kiaa0667 Tip120b	1235	891.457	29.15	High	0.005	0.02739	30602.3	15	194.7	0.5	H-2 Kb
B22	MHC-DB	High	VFWDPSVNL	9		1	2	Q6ZQ88	KDM1A_MOUSE	Lysine-specific histone demethylase 1A (EC 1.-.-.-) (BRAF35-HDAC complex protein BHC110) (Flavin-containing amine oxidase domain-containing protein 2)	Kdm1a Aof2 Kiaa0601 Lsd1	853	1076.54	19.34	High	0.002	0.01399	42220.7	37	222.9	0.6	H-2 Kb
B22	MHC-DB	High	FILLLREVL	9		1	1	Q6ZQ89	MARH6_MOUSE	E3 ubiquitin-protein ligase MARCH6 (EC 6.3.2.-) (Membrane-associated RING finger protein 6) (Membrane-associated RING-CH protein VI) (MARCH-VI)	March6 Kiaa0597	909	1115.72	19.29	High	0	6.88e-06	1738.7	0.6	4870.6	6.5	H-2 Db
Y3	MHC-DB	High	RIYPFLLM	8		1	3	Q6ZQ89	MARH6_MOUSE	E3 ubiquitin-protein ligase MARCH6 (EC 6.3.2.-) (Membrane-associated RING finger protein 6) (Membrane-associated RING-CH protein VI) (MARCH-VI)	March6 Kiaa0597	909	1052.6	28.91	High	0	1.2e-13	23439.2	8.5	23	0.07	H-2 Kb
Y3	MHC-DB	High	IVYTFMTHF	9		1	2	Q6ZQ93	UBP34_MOUSE	Ubiquitin carboxyl-terminal hydrolase 34 (EC 3.4.19.12) (Deubiquitinating enzyme 34) (Ubiquitin thioesterase 34) (Ubiquitin-specific-processing protease 34)	Usp34 Kiaa0570 Murr2	3582	1158.57	34.35	High	0	9.98e-16	7522.1	1.9	13.3	0.04	H-2 Kb
Y3	MHC-DB	High	VAYTYDNL	8		1	2	Q6ZQ93	UBP34_MOUSE	Ubiquitin carboxyl-terminal hydrolase 34 (EC 3.4.19.12) (Deubiquitinating enzyme 34) (Ubiquitin thioesterase 34) (Ubiquitin-specific-processing protease 34)	Usp34 Kiaa0570 Murr2	3582	958.452	41.12	High	0	4.19e-07	9113.4	2.5	2.5	0.01	H-2 Kb
Y3	MHC-DB	High	IQWAFKNL	8		1	2	Q6ZQ93	UBP34_MOUSE	Ubiquitin carboxyl-terminal hydrolase 34 (EC 3.4.19.12) (Deubiquitinating enzyme 34) (Ubiquitin thioesterase 34) (Ubiquitin-specific-processing protease 34)	Usp34 Kiaa0570 Murr2	3582	1019.57	24.22	High	0	9.98e-16	22941.2	8.5	7.8	0.02	H-2 Kb
B22	MHC-DB	High	IAASHADVM	9		1	1	Q6ZQH8	NU188_MOUSE	Nucleoporin NUP188 homolog	Nup188 Kiaa0169	1759	914.44	25.92	High	0	0.002705	610	0.25	3898.6	5.5	H-2 Db
Y3	MHC-DB	Medium	KTLRYNFL	8		1	1	Q6ZQH8	NU188_MOUSE	Nucleoporin NUP188 homolog	Nup188 Kiaa0169	1759	1054.6	11.39	Medium	0.011	0.02739	17303.6	5.5	23.8	0.07	H-2 Kb
Y3	MHC-DB	High	VAPSFGTLL	9		1	3	Q6ZQH8	NU188_MOUSE	Nucleoporin NUP188 homolog	Nup188 Kiaa0169	1759	904.514	44.28	High	0	7.09e-15	1156.4	0.4	24.4	0.07	H-2 Kb
Y3	MHC-DB	High	NVFQYLTRL	9		1	3	Q6ZQH8	NU188_MOUSE	Nucleoporin NUP188 homolog	Nup188 Kiaa0169	1759	1153.64	40.23	High	0	3.21e-14	9988.2	3	44.8	0.15	H-2 Kb
Y3	MHC-DB	Medium	TSYTHSAV	8		1	1	Q6ZQJ5	DNA2_MOUSE	DNA replication ATP-dependent helicase/nuclease DNA2 (DNA replication ATP-dependent helicase-like homolog) [Includes: DNA replication nuclease DNA2 (EC 3.1.-.-); DNA replication ATP-dependent helicase DNA2 (EC 3.6.4.12)]	Dna2 Dna2l Kiaa0083	1062	865.405	12.97	Medium	0.031	0.346	28987.6	13	12.8	0.04	H-2 Kb
Y3	MHC-DB	High	KTFQKLSNL	9		1	1	Q6ZQL4	WDR43_MOUSE	WD repeat-containing protein 43	Wdr43 Kiaa0007	677	1078.63	25.86	High	0.003	0.001256	10645.9	3	53.5	0.175	H-2 Kb
Y3	MHC-DB	High	KVVKFSYM	8		1	3	Q6ZWS8	SPOP_MOUSE	Speckle-type POZ protein (HIB homolog 1) (PDX-1 C-terminal-interacting factor 1)	Spop Pcif1	374	1001.55	44.04	High	0	6.91e-09	13056	4	71.7	0.2	H-2 Kb
Y3	MHC-DB	High	VNDIFERI	8		1	1	Q6ZWY9	H2B1C_MOUSE	Histone H2B type 1-C/E/G	Hist1h2bc; Hist1h2be; Hist1h2bg	126	1005.54	27.82	High	0	9.98e-16	42373.1	37	1171.7	2	H-2 Kb
Y3	MHC-DB	High	SVVAFHNL	8		1	4	Q71B07	D19L3_MOUSE	Probable C-mannosyltransferase DPY19L3 (EC 2.4.1.-) (Dpy-19-like protein 3) (Protein dpy-19 homolog 3)	Dpy19l3	716	886.478	24.3	High	0.003	0.01009	20721.1	7	8.7	0.025	H-2 Kb
Y3	MHC-DB	Medium	TTIMFATA	8		1	1	Q71LX4	TLN2_MOUSE	Talin-2	Tln2	2375	855.428	12.62	Medium	0.043	0.349	34648.5	19	164.6	0.5	H-2 Kb
B22	MHC-DB	High	VMVTNVTSL	9		1	5	Q71LX4	TLN2_MOUSE	Talin-2	Tln2	2375	963.518	54.76	High	0	6.753e-05	9.7	0.01	257.2	0.7	H-2 Db
B22	MHC-DB	High	VMVTNVTSL	9	1xOxidation [M2]	1	2	Q71LX4	TLN2_MOUSE	Talin-2	Tln2	2375	979.513	34.86	High	0	8.386e-05	9.7	0.01	257.2	0.7	H-2 Db
B22	MHC-DB	High	ILANPSHHFI	10		1	1	Q76K27	SIAT2_MOUSE	Beta-galactoside alpha-2,6-sialyltransferase 2 (Alpha 2,6-ST 2) (EC 2.4.99.1) (CMP-N-acetylneuraminate-beta-galactosamide-alpha-2,6-sialyltransferase 2) (ST6Gal II) (ST6GalII) (Sialyltransferase 2)	St6gal2 Kiaa1877	524	1148.62	11.38	High	0.002	0.0189	6786.3	1.8	22499.7	32	H-2 Db
Y3	MHC-DB	High	IIPMFSNL	8	1xOxidation [M4]	1	7	Q76MZ3	2AAA_MOUSE	Serine/threonine-protein phosphatase 2A 65 kDa regulatory subunit A alpha isoform (PP2A subunit A isoform PR65-alpha) (PP2A subunit A isoform R1-alpha)	Ppp2r1a	589	950.502	32.54	High	0.003	0.003654	25681.6	10	2.6	0.01	H-2 Kb
Y3	MHC-DB	High	IIPMFSNL	8		1	4	Q76MZ3	2AAA_MOUSE	Serine/threonine-protein phosphatase 2A 65 kDa regulatory subunit A alpha isoform (PP2A subunit A isoform PR65-alpha) (PP2A subunit A isoform R1-alpha)	Ppp2r1a	589	934.507	30.94	High	0	1.85e-10	25681.6	10	2.6	0.01	H-2 Kb
Y3	MHC-DB	High	VADKFTEL	8		2	4	Q76MZ3	2AAA_MOUSE	Serine/threonine-protein phosphatase 2A 65 kDa regulatory subunit A alpha isoform (PP2A subunit A isoform PR65-alpha) (PP2A subunit A isoform R1-alpha)	Ppp2r1a	589	922.488	36.86	High	0	6.6e-13	28999.2	13	140.9	0.4	H-2 Kb
Y3	MHC-DB	High	SNYLHRVV	8		1	2	Q78JE5	FBX22_MOUSE	F-box only protein 22	Fbxo22 Fbx22	402	987.537	22.49	High	0.006	0.02739	30875.7	15	57.5	0.175	H-2 Kb
Y3	MHC-DB	High	VVYTPWSNL	9		1	2	Q78PG9	CCD25_MOUSE	Coiled-coil domain-containing protein 25	Ccdc25	208	1078.56	34.22	High	0	5.55e-07	14715	4.5	10.4	0.03	H-2 Kb
B22	MHC-DB	High	YMFEAREFL	9		1	1	Q78PY7	SND1_MOUSE	Staphylococcal nuclease domain-containing protein 1 (100 kDa coactivator) (p100 co-activator)	Snd1	910	1205.57	14.68	High	0	0.0001136	317.6	0.15	1139.6	2	H-2 Db
Y3	MHC-DB	High	TAHKRIMIL	9	1xOxidation [M7]	1	1	Q78YY6	DJC15_MOUSE	DnaJ homolog subfamily C member 15	Dnajc15 Dnajd1	149	1098.65	12.37	High	0.003	0.000932	24768.4	9.5	706.3	1.4	H-2 Kb
Y3	MHC-DB	High	TSVVFNKL	8		1	1	Q791N7	RPA12_MOUSE	DNA-directed RNA polymerase I subunit RPA12 (Zinc ribbon domain-containing protein 1)	Znrd1 Rpa12	123	907.525	32.12	High	0.003	0.000932	25050.4	9.5	16.7	0.05	H-2 Kb
Y3	MHC-DB	High	VAFDFTKV	8		1	3	Q7M6Y3	PICAL_MOUSE	Phosphatidylinositol-binding clathrin assembly protein (Clathrin assembly lymphoid myeloid leukemia) (CALM)	Picalm Calm Fit1	660	926.498	45.07	High	0	0.0001867	19747.1	6.5	10.6	0.03	H-2 Kb
Y3	MHC-DB	Medium	AFPNIDKI	8		1	1	Q7M759	AB17B_MOUSE	Protein ABHD17B (EC 3.-.-.-) (Alpha/beta hydrolase domain-containing protein 17B) (Abhydrolase domain-containing protein 17B)	Abhd17b	288	917.509	14.99	Medium	0.037	0.3489	7641.7	2	21868.5	30	H-2 Db
B22	MHC-DB	High	DALSNVDLL	9		1	3	Q7TMB8	CYFP1_MOUSE	Cytoplasmic FMR1-interacting protein 1 (Specifically Rac1-associated protein 1) (Sra-1)	Cyfip1 Kiaa0068 Shyc Sra1	1253	959.504	40.81	High	0	9.191e-05	46	0.04	8839.8	12	H-2 Db
B22	MHC-DB	High	FTEAESNMNDL	11		1	1	Q7TMM9	TBB2A_MOUSE	Tubulin beta-2A chain	Tubb2a Tubb2	445	1270.53	48.59	High	0	1.062e-05	7303.3	1.9	31757.6	55	H-2 Db
Y3	MHC-DB	High	FTEAESNMNDL	11		1	2	Q7TMM9	TBB2A_MOUSE	Tubulin beta-2A chain	Tubb2a Tubb2	445	1270.53	51.8	High	0	9.98e-16	7303.3	1.9	31757.6	55	H-2 Db
B22	MHC-DB	High	QSLTNILHL	9		1	1	Q7TMR0	PCP_MOUSE	Lysosomal Pro-X carboxypeptidase (EC 3.4.16.2) (Proline carboxypeptidase) (Prolylcarboxypeptidase) (PRCP)	Prcp	491	1038.59	23.96	High	0	0.001893	87.2	0.06	561.5	1.2	H-2 Db
B22	MHC-DB	High	SQLIHLIYI	9		1	3	Q7TMV3	FAKD5_MOUSE	FAST kinase domain-containing protein 5, mitochondrial	Fastkd5 Kiaa1792	762	1099.65	34.43	High	0	0.0001194	175.4	0.1	766.8	1.5	H-2 Db
Y3	MHC-DB	High	VAYGFRNI	8		1	3	Q7TMW6	NARFL_MOUSE	Cytosolic Fe-S cluster assembly factor NARFL (Iron-only hydrogenase-like protein 1) (IOP1) (Nuclear prelamin A recognition factor-like protein)	Narfl	476	939.505	31.13	High	0.003	0.0009325	18826.5	6	3.8	0.01	H-2 Kb
Y3	MHC-DB	Medium	SALRFLVV	8		1	1	Q7TMY8	HUWE1_MOUSE	E3 ubiquitin-protein ligase HUWE1 (EC 6.3.2.-) (E3Histone) (HECT, UBA and WWE domain-containing protein 1) (Upstream regulatory element-binding protein 1) (URE-B1) (URE-binding protein 1)	Huwe1 Kiaa0312 Ureb1	4377	904.562	12.15	Medium	0.043	0.3489	9968.4	3	136.1	0.4	H-2 Kb
B22	MHC-DB	High	GSLSNSVFL	9		1	1	Q7TN22	TXD16_MOUSE	Thioredoxin domain-containing protein 16	Txndc16 Kiaa1344	820	923.483	22.73	High	0	0.0008448	10.6	0.01	3279.2	5	H-2 Db
Y3	MHC-DB	High	SITKFLNRI	9		1	4	Q7TNB8	SBNO2_MOUSE	Protein strawberry notch homolog 2	Sbno2 Sno Stno	1349	1091.66	23.08	High	0	0.0002095	29114.9	13	195.8	0.5	H-2 Kb
Y3	MHC-DB	High	SAPEYVFL	8		1	1	Q7TNB8	SBNO2_MOUSE	Protein strawberry notch homolog 2	Sbno2 Sno Stno	1349	925.467	12.76	High	0.003	0.00608	5194.2	1.4	21.6	0.07	H-2 Kb
Y3	MHC-DB	High	VADKFSEL	8		2	3	Q7TNP2	2AAB_MOUSE	Serine/threonine-protein phosphatase 2A 65 kDa regulatory subunit A beta isoform (PP2A subunit A isoform PR65-beta) (PP2A subunit A isoform R1-beta)	Ppp2r1b	601	908.472	39.84	High	0	1.64e-08	33916.7	18	100.9	0.3	H-2 Kb
B22	MHC-DB	High	STLMNHERI	9		1	1	Q7TNU6	ZN250_MOUSE	Zinc finger protein 250 (Zinc finger protein 647)	Znf250 Zfp647 Znf647	535	1100.55	18.79	High	0.001	0.008354	77.1	0.05	963.1	1.7	H-2 Db
B22	MHC-DB	High	AAVLNPRFL	9		1	1	Q7TPS5	C2CD5_MOUSE	C2 domain-containing protein 5 (138 kDa C2 domain-containing phosphoprotein)	C2cd5 Cdp138 Kiaa0528	1016	1000.59	40.6	High	0	0.0001068	19.3	0.015	3605.1	5	H-2 Db
Y3	MHC-DB	High	RAIAFQHL	8		1	2	Q7TPV4	MBB1A_MOUSE	Myb-binding protein 1A (Myb-binding protein of 160 kDa)	Mybbp1a P160	1344	955.547	19.95	High	0	1.96e-08	10293.9	3	11.2	0.04	H-2 Kb
B22	MHC-DB	High	MVISKPQNL	9		1	2	Q7TPV4	MBB1A_MOUSE	Myb-binding protein 1A (Myb-binding protein of 160 kDa)	Mybbp1a P160	1344	1029.58	18.12	High	0	0.002185	28770.8	13	460.7	1	H-2 Kb
Y3	MHC-DB	High	RSPKYLEL	8		1	2	Q7TPV4	MBB1A_MOUSE	Myb-binding protein 1A (Myb-binding protein of 160 kDa)	Mybbp1a P160	1344	1005.57	11.12	High	0	0.0005537	26511.1	11	58	0.175	H-2 Kb
Y3	MHC-DB	Medium	LAVRFTALDL	10		1	1	Q7TQH7	LRP10_MOUSE	Low-density lipoprotein receptor-related protein 10 (LRP-10)	Lrp10 Lrp9	713	1118.66	10.26	Medium	0.021	0.09212	15614.7	5	609.4	1.2	H-2 Kb
Y3	MHC-DB	High	NTYKYAKI	8		1	3	Q7TQI7	ABTB2_MOUSE	Ankyrin repeat and BTB/POZ domain-containing protein 2	Abtb2	1024	1000.55	24.22	High	0.002	0.000932	35262.7	20	37.2	0.125	H-2 Kb
Y3	MHC-DB	High	IFRYLTNL	8		1	2	Q7TQI8	TSYL2_MOUSE	Testis-specific Y-encoded-like protein 2 (TSPY-like protein 2) (CASK-interacting nucleosome assembly protein) (Differentially-expressed nucleolar TGF-beta1 target protein)	Tspyl2 Cinap Dentt DXBwg1396e Tspx	677	1039.59	35.37	High	0	9.98e-16	26002.6	11	36.2	0.125	H-2 Kb
B22	MHC-DB	High	IAVQNNQQL	9		1	2	Q7TQK1	INT7_MOUSE	Integrator complex subunit 7 (Int7)	Ints7	966	1027.55	41.56	High	0	1.094e-06	75.1	0.05	2475.1	4	H-2 Db
B22	MHC-DB	Medium	LNFSRGTEI	9		1	1	Q7TRF3	OL867_MOUSE	Olfactory receptor 867	Olfr867	331	1036.54	11.26	Medium	0.02	0.1515	24602.6	9.5	721.3	1.4	H-2 Kb
B22	MHC-DB	High	RSLDNAESL	9		1	2	Q7TS75	AMER1_MOUSE	APC membrane recruitment protein 1 (Amer1) (Protein FAM123B)	Amer1 Fam123b	1132	1004.5	21.92	High	0	0.001901	145.9	0.09	5089.3	7	H-2 Db
B22	MHC-DB	High	SQVINSHSV	9		1	2	Q7TSA3	BTLA_MOUSE	B- and T-lymphocyte attenuator (B- and T-lymphocyte-associated protein) (CD antigen CD272)	Btla	306	970.495	36.62	High	0	0.001118	36.7	0.025	7038.6	9	H-2 Db
B22	MHC-DB	Medium	LSFLQGLTSL	10		1	1	Q7TSI1	PKHM1_MOUSE	Pleckstrin homology domain-containing family M member 1 (PH domain-containing family M member 1)	Plekhm1	1074	1078.61	12.32	Medium	0.027	0.1814	3438.5	0.9	816.3	1.5	H-2 Db
B22	MHC-DB	High	SAILNEWTL	9		1	2	Q7TSI1	PKHM1_MOUSE	Pleckstrin homology domain-containing family M member 1 (PH domain-containing family M member 1)	Plekhm1	1074	1046.55	45.71	High	0	1.788e-05	5.5	0.01	2181.7	3.5	H-2 Db
Y3	MHC-DB	High	SLYEHVERM	9		1	1	Q7TSI1	PKHM1_MOUSE	Pleckstrin homology domain-containing family M member 1 (PH domain-containing family M member 1)	Plekhm1	1074	1163.55	27.43	High	0	9.98e-16	11412	3.5	383.3	0.9	H-2 Kb
B22	MHC-DB	High	MFFTSTANPL	10	1xOxidation [M1]	1	1	Q7TSN6	GP151_MOUSE	Probable G-protein coupled receptor 151 protein (G-protein coupled receptor PGR7) (GPCR-2037)	Gpr151 Pgr7	422	1144.53	10.51	High	0.005	0.05509	16314	5	1070.3	1.9	H-2 Kb
Y3	MHC-DB	High	VTWKYTAL	8		1	2	Q7TSQ8	PDPR_MOUSE	Pyruvate dehydrogenase phosphatase regulatory subunit, mitochondrial (PDPr)	Pdpr Kiaa1990	878	981.54	31.53	High	0	3.4e-15	23434.2	8.5	3.6	0.01	H-2 Kb
B22	MHC-DB	High	SALHNDLQI	9		1	1	Q7TSS2	UB2Q1_MOUSE	Ubiquitin-conjugating enzyme E2 Q1 (EC 2.3.2.23) (E2 ubiquitin-conjugating enzyme Q1) (Galactosyl transferase-associated protein) (GTAP) (Ubiquitin carrier protein Q1) (Ubiquitin-protein ligase Q1)	Ube2q1 Ube2q	422	1010.53	14.86	High	0.001	0.00764	19.7	0.015	2629.1	4	H-2 Db
Y3	MHC-DB	Medium	TVILHGYQI	9		1	1	Q7TST5	LAMP3_MOUSE	Lysosome-associated membrane glycoprotein 3 (LAMP-3) (Lysosomal-associated membrane protein 3) (DC-lysosome-associated membrane glycoprotein) (DC LAMP) (CD antigen CD208)	Lamp3	411	1043.59	21.02	Medium	0.018	0.09212	7617.3	2	1137.7	2	H-2 Kb
B22	MHC-DB	High	SAQQNQTKI	9		1	2	Q7TSY8	SGO2_MOUSE	Shugoshin 2 (Shugoshin-2) (Shugoshin-like 2)	Sgo2 Sgol2 Sgol2a	1164	1017.53	25.47	High	0	0.001192	35	0.025	8353.2	11	H-2 Db
B22	MHC-DB	High	SAIHNSTKV	9		1	2	Q80SU7	GVIN1_MOUSE	Interferon-induced very large GTPase 1 (Very large-inducible GTPase-1) (VLIG-1)	Gvin1	2427	956.516	29.96	High	0	0.0001631	12.8	0.01	1756.3	3	H-2 Db
B22	MHC-DB	High	VQVTGGQYL	9		1	1	Q80SX8	PIF1_MOUSE	ATP-dependent DNA helicase PIF1 (EC 3.6.4.12) (DNA repair and recombination helicase PIF1) (Pif1/Rrm3 DNA helicase-like protein)	Pif1	650	964.51	25.22	High	0	0.0004145	1246.9	0.4	8501.7	11	H-2 Db
B22	MHC-DB	High	YMIDNIILL	9		1	2	Q80SY3	VA0D2_MOUSE	V-type proton ATPase subunit d 2 (V-ATPase subunit d 2) (Osteoclast-specific vacuolar ATP synthase) (Vacuolar proton pump subunit d 2)	Atp6v0d2	350	1107.61	21.34	High	0	0.0006933	42.7	0.03	517.9	1.1	H-2 Db
Y3	MHC-DB	High	VFYEREVQM	9	1xOxidation [M9]	1	2	Q80SY3	VA0D2_MOUSE	V-type proton ATPase subunit d 2 (V-ATPase subunit d 2) (Osteoclast-specific vacuolar ATP synthase) (Vacuolar proton pump subunit d 2)	Atp6v0d2	350	1216.57	47.7	High	0	9.98e-16	32557.9	17	86.2	0.25	H-2 Kb
Y3	MHC-DB	High	VFYEREVQM	9		1	4	Q80SY3	VA0D2_MOUSE	V-type proton ATPase subunit d 2 (V-ATPase subunit d 2) (Osteoclast-specific vacuolar ATP synthase) (Vacuolar proton pump subunit d 2)	Atp6v0d2	350	1200.57	45.83	High	0	2.39e-14	32557.9	17	86.2	0.25	H-2 Kb
Y3	MHC-DB	High	AKYLFSAL	8		1	2	Q80TC6	ZSWM5_MOUSE	Zinc finger SWIM domain-containing protein 5	Zswim5 Kiaa1511	1188	912.519	17.74	High	0.003	0.000932	22687.7	8	8.9	0.025	H-2 Kb
B22	MHC-DB	Medium	DSVRRMVNL	9	1xOxidation [M6]	1	2	Q80TG9	LRFN2_MOUSE	Leucine-rich repeat and fibronectin type-III domain-containing protein 2	Lrfn2 Kiaa1246 Salm1	788	1105.58	20.58	Medium	0.011	0.09158	34506.7	19	878.9	1.6	H-2 Kb
Y3	MHC-DB	Medium	DSVRRMVNL	9	1xOxidation [M6]	1	1	Q80TG9	LRFN2_MOUSE	Leucine-rich repeat and fibronectin type-III domain-containing protein 2	Lrfn2 Kiaa1246 Salm1	788	1105.58	26.39	Medium	0.022	0.09212	34506.7	19	878.9	1.6	H-2 Kb
B22	MHC-DB	Medium	ASIANLINL	9		1	1	Q80TH2	LAP2_MOUSE	Protein LAP2 (Densin-180-like protein) (Erbb2-interacting protein) (Erbin)	Erbb2ip Erbin Kiaa1225 Lap2	1402	928.546	15.47	Medium	0.011	0.09275	17.1	0.01	155.4	0.4	H-2 Db
Y3	MHC-DB	Medium	VGTVYEQL	8		1	2	Q80TI1	PKHH1_MOUSE	Pleckstrin homology domain-containing family H member 1 (PH domain-containing family H member 1)	Plekhh1 Kiaa1200	1356	908.472	14.52	Medium	0.011	0.02739	35160.2	20	78.4	0.25	H-2 Kb
Y3	MHC-DB	High	VTVVFERM	8		1	2	Q80TL7	MON2_MOUSE	Protein MON2 homolog (Protein SF21)	Mon2 Kiaa1040 Sf21	1715	980.523	30.12	High	0	9.98e-16	26640.5	11	19.9	0.06	H-2 Kb
Y3	MHC-DB	High	VGYRFVTAI	9		1	4	Q80TM9	NISCH_MOUSE	Nischarin (Imidazoline receptor 1) (I-1) (IR1) (Imidazoline receptor I-1-like protein) (Imidazoline-1 receptor) (I1R)	Nisch Kiaa0975	1593	1025.58	43.11	High	0	1.07e-05	1730.4	0.6	6.8	0.02	H-2 Kb
Y3	MHC-DB	High	TNQDFIQRL	9		1	5	Q80TM9	NISCH_MOUSE	Nischarin (Imidazoline receptor 1) (I-1) (IR1) (Imidazoline receptor I-1-like protein) (Imidazoline-1 receptor) (I1R)	Nisch Kiaa0975	1593	1134.59	40.98	High	0.001	0.000932	45491.9	55	149.4	0.4	H-2 Kb
B22	MHC-DB	High	FTWTGAEHI	9		1	1	Q80TP3	UBR5_MOUSE	E3 ubiquitin-protein ligase UBR5 (EC 6.3.2.-) (E3 ubiquitin-protein ligase, HECT domain-containing 1) (Hyperplastic discs protein homolog)	Ubr5 Edd Edd1 Kiaa0896	2792	1061.51	13.9	High	0.001	0.00628	2633.7	0.8	10305	13	H-2 Db
B22	MHC-DB	High	QAPINFTSRL	10		1	1	Q80TR8	VPRBP_MOUSE	Protein VPRBP (DDB1- and CUL4-associated factor 1) (Serine/threonine-protein kinase VPRBP) (EC 2.7.11.1)	Vprbp Dcaf1 Kiaa0800	1506	1146.63	11.17	High	0.001	0.00944	216.3	0.125	334.6	0.8	H-2 Db
B22	MHC-DB	High	SIVKNLNFI	9		1	1	Q80TY5	VP13B_MOUSE	Vacuolar protein sorting-associated protein 13B (Cohen syndrome protein 1 homolog)	Vps13b Coh1 Kiaa0532	4013	1047.62	18.41	High	0	0.00548	46.5	0.04	3428.1	5	H-2 Db
Y3	MHC-DB	High	MSFQFAHL	8	1xOxidation [M1]	1	2	Q80TY5	VP13B_MOUSE	Vacuolar protein sorting-associated protein 13B (Cohen syndrome protein 1 homolog)	Vps13b Coh1 Kiaa0532	4013	996.461	35.19	High	0	9.98e-16	5593.6	1.4	1.8	0.01	H-2 Kb
Y3	MHC-DB	High	MSFQFAHL	8		1	4	Q80TY5	VP13B_MOUSE	Vacuolar protein sorting-associated protein 13B (Cohen syndrome protein 1 homolog)	Vps13b Coh1 Kiaa0532	4013	980.466	32.8	High	0.003	0.00707	5593.6	1.4	1.8	0.01	H-2 Kb
Y3	MHC-DB	High	VIVSMYHL	8		1	3	Q80TZ3	AUXI_MOUSE	Putative tyrosine-protein phosphatase auxilin (EC 3.1.3.48) (DnaJ homolog subfamily C member 6)	Dnajc6 Kiaa0473	938	961.518	43.53	High	0	6.18e-14	16011.5	5	40.5	0.125	H-2 Kb
B22	MHC-DB	High	VAPAAHTHI	9		1	1	Q80TZ9	RERE_MOUSE	Arginine-glutamic acid dipeptide repeats protein (Atrophin-2)	Rere Atr2 Kiaa0458	1558	916.5	15.24	High	0	0.001474	1459.3	0.5	598	1.2	H-2 Db
B22	MHC-DB	High	SSVQNGIML	9		1	4	Q80U04	PJA2_MOUSE	E3 ubiquitin-protein ligase Praja-2 (Praja2) (EC 6.3.2.-) (RING finger protein 131)	Pja2 Kiaa0438 Rnf131	707	948.482	38.95	High	0	0.0001214	19.6	0.015	1226.8	2.5	H-2 Db
B22	MHC-DB	High	SSVQNGIML	9	1xOxidation [M8]	1	3	Q80U04	PJA2_MOUSE	E3 ubiquitin-protein ligase Praja-2 (Praja2) (EC 6.3.2.-) (RING finger protein 131)	Pja2 Kiaa0438 Rnf131	707	964.477	32.08	High	0	0.0002711	19.6	0.015	1226.8	2.5	H-2 Db
Y3	MHC-DB	High	SSVQNGIML	9		1	1	Q80U04	PJA2_MOUSE	E3 ubiquitin-protein ligase Praja-2 (Praja2) (EC 6.3.2.-) (RING finger protein 131)	Pja2 Kiaa0438 Rnf131	707	948.482	13.38	High	0.004	0.02296	19.6	0.015	1226.8	2.5	H-2 Db
B22	MHC-DB	High	YTLHNIDQL	9		1	1	Q80U44	ZFY16_MOUSE	Zinc finger FYVE domain-containing protein 16 (Endofin) (Endosomal-associated FYVE domain protein)	Zfyve16 Kiaa0305	1528	1116.57	26.77	High	0	0.0002255	27.6	0.02	3374	5	H-2 Db
Y3	MHC-DB	High	AIFTKGYLCL	10		1	1	Q80U56	AVL9_MOUSE	Late secretory pathway protein AVL9 homolog	Avl9 Kiaa0241	649	1128.61	15.89	High	0.007	0.02739	14034.8	4	1095.6	1.9	H-2 Kb
Y3	MHC-DB	High	AVYIHALL	8		1	1	Q80U56	AVL9_MOUSE	Late secretory pathway protein AVL9 homolog	Avl9 Kiaa0241	649	899.535	15.87	High	0.003	0.003654	25238.9	10	5.7	0.015	H-2 Kb
Y3	MHC-DB	High	SRFIFNYV	8		1	2	Q80U70	SUZ12_MOUSE	Polycomb protein Suz12 (Suppressor of zeste 12 protein homolog)	Suz12 D11Ertd530e Kiaa0160	741	1045.55	18.66	High	0.002	0.000932	25112.5	10	100.1	0.3	H-2 Kb
Y3	MHC-DB	High	LSLASAFSL	9		1	1	Q80UE6	WNK4_MOUSE	Serine/threonine-protein kinase WNK4 (EC 2.7.11.1) (Protein kinase lysine-deficient 4) (Protein kinase with no lysine 4)	Wnk4 Prkwnk4	1222	908.509	35.32	High	0.003	0.003654	2365.5	0.7	1503.9	2.5	H-2 Db
Y3	MHC-DB	High	SQLEFRQNL	9		1	1	Q80UK0	SESD1_MOUSE	SEC14 domain and spectrin repeat-containing protein 1 (Huntingtin-interacting protein-like protein)	Sestd1	696	1134.59	16.48	High	0	5.42e-09	5164.9	1.4	23.5	0.07	H-2 Kb
Y3	MHC-DB	High	STYDYGRQL	9		1	2	Q80UK0	SESD1_MOUSE	SEC14 domain and spectrin repeat-containing protein 1 (Huntingtin-interacting protein-like protein)	Sestd1	696	1102.52	23.35	High	0	9.98e-16	39692.9	29	27.4	0.08	H-2 Kb
B22	MHC-DB	High	ASLTNKHSQEL	11		1	1	Q80UK7	SAS6_MOUSE	Spindle assembly abnormal protein 6 homolog	Sass6 Sas6	654	1227.63	12.17	High	0	0.002118	631.2	0.25	9315.3	12	H-2 Db
B22	MHC-DB	Medium	SAVPVSHTQVM	11		1	1	Q80UK8	INT2_MOUSE	Integrator complex subunit 2 (Int2)	Ints2 Kiaa1287	1198	1155.58	11.09	Medium	0.03	0.1981	7109.3	1.8	16819.6	22	H-2 Db
Y3	MHC-DB	Medium	SAVPVSHTQVM	11		1	1	Q80UK8	INT2_MOUSE	Integrator complex subunit 2 (Int2)	Ints2 Kiaa1287	1198	1155.58	16.55	Medium	0.014	0.02739	7109.3	1.8	16819.6	22	H-2 Db
B22	MHC-DB	High	RAIELATTL	9		1	1	Q80UM3	NAA15_MOUSE	N-alpha-acetyltransferase 15, NatA auxiliary subunit (N-terminal acetyltransferase 1) (NMDA receptor-regulated protein 1) (Protein tubedown-1)	Naa15 Narg1 Nat1 Tbdn-1 Tubedown	865	987.583	27.25	High	0	0.001461	46.3	0.04	1335.7	2.5	H-2 Db
B22	MHC-DB	High	SAVENLNEM	9	1xOxidation [M9]	1	2	Q80UM3	NAA15_MOUSE	N-alpha-acetyltransferase 15, NatA auxiliary subunit (N-terminal acetyltransferase 1) (NMDA receptor-regulated protein 1) (Protein tubedown-1)	Naa15 Narg1 Nat1 Tbdn-1 Tubedown	865	1022.45	46.36	High	0	6.055e-06	5.1	0.01	2181.2	3.5	H-2 Db
B22	MHC-DB	High	SAVENLNEM	9		1	3	Q80UM3	NAA15_MOUSE	N-alpha-acetyltransferase 15, NatA auxiliary subunit (N-terminal acetyltransferase 1) (NMDA receptor-regulated protein 1) (Protein tubedown-1)	Naa15 Narg1 Nat1 Tbdn-1 Tubedown	865	1006.45	41.75	High	0	0.0001663	5.1	0.01	2181.2	3.5	H-2 Db
Y3	MHC-DB	High	SAVENLNEM	9		1	1	Q80UM3	NAA15_MOUSE	N-alpha-acetyltransferase 15, NatA auxiliary subunit (N-terminal acetyltransferase 1) (NMDA receptor-regulated protein 1) (Protein tubedown-1)	Naa15 Narg1 Nat1 Tbdn-1 Tubedown	865	1006.45	13.91	High	0.002	0.000932	5.1	0.01	2181.2	3.5	H-2 Db
Y3	MHC-DB	High	TSAHFARL	8		1	2	Q80UP5	AN13A_MOUSE	Ankyrin repeat domain-containing protein 13A	Ankrd13a Ankrd13	588	902.484	15.24	High	0.003	0.0009335	35602.4	21	7.3	0.02	H-2 Kb
B22	MHC-DB	High	NAPPSNPVAM	10	1xOxidation [M10]	1	4	Q80UV9	TAF1_MOUSE	Transcription initiation factor TFIID subunit 1 (EC 2.3.1.48) (EC 2.7.11.1) (Cell cycle gene 1 protein) (TBP-associated factor 250 kDa) (p250) (Transcription initiation factor TFIID 250 kDa subunit) (TAF(II)250) (TAFII-250) (TAFII250)	Taf1 Ccg1	1891	1013.47	34.78	High	0	0.0001146	139.7	0.08	27259.5	42	H-2 Db
B22	MHC-DB	High	NAPPSNPVAM	10		1	2	Q80UV9	TAF1_MOUSE	Transcription initiation factor TFIID subunit 1 (EC 2.3.1.48) (EC 2.7.11.1) (Cell cycle gene 1 protein) (TBP-associated factor 250 kDa) (p250) (Transcription initiation factor TFIID 250 kDa subunit) (TAF(II)250) (TAFII-250) (TAFII250)	Taf1 Ccg1	1891	997.477	32.2	High	0	5.524e-05	139.7	0.08	27259.5	42	H-2 Db
B22	MHC-DB	High	YSPSSREAM	9		1	1	Q80UY2	KCMF1_MOUSE	E3 ubiquitin-protein ligase KCMF1 (EC 6.3.2.-) (Differentially expressed in branching tubulogenesis 91) (Debt-91)	Kcmf1 Debt91	381	1027.45	23.19	High	0	0.00185	163.3	0.09	7659.1	10	H-2 Db
B22	MHC-DB	High	YAPDNVWFI	9		1	3	Q80V94	AP4E1_MOUSE	AP-4 complex subunit epsilon-1 (AP-4 adaptor complex subunit epsilon) (Adaptor-related protein complex 4 subunit epsilon-1) (Epsilon subunit of AP-4) (Epsilon-adaptin)	Ap4e1	1122	1124.54	29.5	High	0	0.001163	38	0.025	20501.2	28	H-2 Db
Y3	MHC-DB	High	INLKYLGL	8		1	1	Q80V94	AP4E1_MOUSE	AP-4 complex subunit epsilon-1 (AP-4 adaptor complex subunit epsilon) (Adaptor-related protein complex 4 subunit epsilon-1) (Epsilon subunit of AP-4) (Epsilon-adaptin)	Ap4e1	1122	933.577	26.09	High	0.003	0.000932	38450.1	26	6.3	0.015	H-2 Kb
Y3	MHC-DB	Medium	EGWQGNPPPL	10		1	1	Q80VA0	GALT7_MOUSE	N-acetylgalactosaminyltransferase 7 (EC 2.4.1.-) (Polypeptide GalNAc transferase 7) (GalNAc-T7) (pp-GaNTase 7) (Protein-UDP acetylgalactosaminyltransferase 7) (UDP-GalNAc:polypeptide N-acetylgalactosaminyltransferase 7)	Galnt7	657	1094.53	11.72	Medium	0.016	0.06715	7642.1	2	23224.7	33	H-2 Db
Y3	MHC-DB	High	SSPEFSEL	8		1	1	Q80VD1	FA98B_MOUSE	Protein FAM98B	Fam98b	429	895.404	20.55	High	0	1.66e-12	15365	4.5	10.8	0.03	H-2 Kb
Y3	MHC-DB	Medium	IMKYLGL	7	1xOxidation [M2]	1	1	Q80VG1	SCML4_MOUSE	Sex comb on midleg-like protein 4	Scml4	408	853.485	12.27	Medium	0.022	0.09212	na	na	na	na	na
B22	MHC-DB	High	AALQNAVAF	9		1	3	Q80VI1	TRI56_MOUSE	E3 ubiquitin-protein ligase TRIM56 (EC 6.3.2.-) (Tripartite motif-containing protein 56)	Trim56	734	904.489	34.19	High	0	8.864e-05	13.7	0.01	2643	4	H-2 Db
Y3	MHC-DB	Medium	KGYIFLTL	8		1	1	Q80VI1	TRI56_MOUSE	E3 ubiquitin-protein ligase TRIM56 (EC 6.3.2.-) (Tripartite motif-containing protein 56)	Trim56	734	954.566	14.64	Medium	0.021	0.09212	10865.5	3	7.6	0.02	H-2 Kb
B22	MHC-DB	High	AQLRNLDNA	9		1	1	Q80VY9	DHX33_MOUSE	Putative ATP-dependent RNA helicase DHX33 (EC 3.6.4.13) (DEAH box protein 33)	Dhx33	698	1014.53	20.48	High	0.002	0.0118	149.3	0.09	18751.3	25	H-2 Db
B22	MHC-DB	High	YHPGVNGPPL	10		1	2	Q80W00	PP1RA_MOUSE	Serine/threonine-protein phosphatase 1 regulatory subunit 10 (MHC class I region proline-rich protein CAT53)	Ppp1r10 Cat53 Pnuts	888	1050.54	25.49	High	0	0.002438	396.4	0.175	19858.7	27	H-2 Db
Y3	MHC-DB	High	EIISFQHL	8		1	2	Q80WG5	LRC8A_MOUSE	Volume-regulated anion channel subunit LRRC8A (Leucine-rich repeat-containing protein 8A)	Lrrc8a Lrrc8	810	986.531	22.04	High	0	0.000932	33231.9	18	146.9	0.4	H-2 Kb
Y3	MHC-DB	High	SGLRYAGL	8		1	1	Q80WT0	JPH4_MOUSE	Junctophilin-4 (JP-4) (Junctophilin-like 1 protein)	Jph4 Jphl1	628	836.463	13.56	High	0.003	0.003654	33950.5	18	3.7	0.01	H-2 Kb
Y3	MHC-DB	High	VLIYNVTTVI	10		1	1	Q80WT4	GP176_MOUSE	Probable G-protein coupled receptor 176 (G-protein coupled receptor AGR9)	Gpr176 Agr9 Gm1012	515	1134.68	14.47	High	0.003	0.000932	558.6	0.25	5783.3	7.5	H-2 Db
B22	MHC-DB	High	IALHNIDSV	9		1	1	Q80X82	SYMPK_MOUSE	Symplekin	Sympk	1284	981.536	21.55	High	0	0.0008082	15.2	0.01	2055	3.5	H-2 Db
Y3	MHC-DB	Medium	VISKFTNM	8		1	1	Q80X85	RT07_MOUSE	28S ribosomal protein S7, mitochondrial (MRP-S7) (S7mt)	Mrps7	242	939.497	11.57	Medium	0.024	0.1211	25776.8	10	19.1	0.06	H-2 Kb
B22	MHC-DB	Medium	VALKSVTAF	9		1	1	Q80XI3	IF4G3_MOUSE	Eukaryotic translation initiation factor 4 gamma 3 (eIF-4-gamma 3) (eIF-4G 3) (eIF4G 3) (eIF-4-gamma II) (eIF4GII)	Eif4g3	1579	935.556	15.61	Medium	0.024	0.166	2396.3	0.7	813.7	1.5	H-2 Db
B22	MHC-DB	High	KAISNSHYVL	10		1	3	Q80XK6	ATG2B_MOUSE	Autophagy-related protein 2 homolog B	Atg2b	2075	1131.62	28.97	High	0	7.024e-05	12.4	0.01	6540.4	8.5	H-2 Db
B22	MHC-DB	High	TVNLNRDYV	9		1	1	Q80XK6	ATG2B_MOUSE	Autophagy-related protein 2 homolog B	Atg2b	2075	1093.56	19.54	High	0	0.0005569	160.1	0.09	7237.3	9.5	H-2 Db
B22	MHC-DB	High	MSVGQMEFL	9		1	2	Q80XK6	ATG2B_MOUSE	Autophagy-related protein 2 homolog B	Atg2b	2075	1041.47	16.15	High	0.008	0.06849	6977.2	1.8	4837.1	6.5	H-2 Db
B22	MHC-DB	High	KTLLNPEYL	9		2	1	Q80XQ2	TBCD5_MOUSE	TBC1 domain family member 5	Tbc1d5	815	1090.61	20.97	High	0	0.0002529	22.7	0.015	3457.3	5	H-2 Db
B22	MHC-DB	High	RGPVNLQHL	9		1	2	Q80XU8	LRFN4_MOUSE	Leucine-rich repeat and fibronectin type-III domain-containing protein 4	Lrfn4 Salm3	636	1033.59	22.21	High	0	0.0007041	54.5	0.04	1640.9	3	H-2 Db
B22	MHC-DB	High	VSVANVDLL	9		1	3	Q80Y17	L2GL1_MOUSE	Lethal(2) giant larvae protein homolog 1 (LLGL) (Mgl-1) (Mlgl)	Llgl1 Llglh	1036	929.53	31.37	High	0	0.000122	8.6	0.01	912	1.7	H-2 Db
Y3	MHC-DB	High	TSFTFRKV	8		1	3	Q80Y20	ALKB8_MOUSE	Alkylated DNA repair protein alkB homolog 8 (EC 1.14.11.-) (Probable alpha-ketoglutarate-dependent dioxygenase ABH8) (S-adenosyl-L-methionine-dependent tRNA methyltransferase ABH8) (tRNA (carboxymethyluridine(34)-5-O)-methyltransferase ABH8) (EC 2.1.1.-) (EC 2.1.1.229)	Alkbh8	664	985.547	30.62	High	0.003	0.003654	31879.5	16	7.3	0.02	H-2 Kb
Y3	MHC-DB	High	VSYIRSVYL	9		1	2	Q80Y44	DDX10_MOUSE	Probable ATP-dependent RNA helicase DDX10 (EC 3.6.4.13) (DEAD box protein 10)	Ddx10	875	1099.61	28.07	High	0	4.17e-11	4035.3	1.1	7.3	0.02	H-2 Kb
B22	MHC-DB	High	AQYRLVTEI	9		1	2	Q80Y44	DDX10_MOUSE	Probable ATP-dependent RNA helicase DDX10 (EC 3.6.4.13) (DEAD box protein 10)	Ddx10	875	1092.6	33.24	High	0	0.000197	421.3	0.2	1295.2	2.5	H-2 Db
Y3	MHC-DB	High	VQYLYRVF	8		1	1	Q80Y44	DDX10_MOUSE	Probable ATP-dependent RNA helicase DDX10 (EC 3.6.4.13) (DEAD box protein 10)	Ddx10	875	1087.59	25.05	High	0	9.98e-16	25731.9	10	54.4	0.175	H-2 Kb
B22	MHC-DB	High	ISKENGDYL	9		1	2	Q80Y98	DDHD2_MOUSE	Phospholipase DDHD2 (EC 3.1.1.-) (DDHD domain-containing protein 2) (SAM, WWE and DDHD domain-containing protein 1)	Ddhd2 Kiaa0725 Samwd1	699	1038.51	32.56	High	0	0.0004648	81.9	0.05	8224.4	11	H-2 Db
B22	MHC-DB	High	VYYLHSLQI	9		1	1	Q80YE7	DAPK1_MOUSE	Death-associated protein kinase 1 (DAP kinase 1) (EC 2.7.11.1)	Dapk1	1442	1135.61	12.11	High	0.003	0.03289	22506	8	107.3	0.3	H-2 Kb
B22	MHC-DB	High	SVLRNPFETI	10		1	3	Q80YR7	CLSPN_MOUSE	Claspin	Clspn	1315	1175.64	33.07	High	0	5.043e-05	118.6	0.07	4886.3	6.5	H-2 Db
Y3	MHC-DB	High	RNFVFHTL	8		1	4	Q80YR7	CLSPN_MOUSE	Claspin	Clspn	1315	1033.56	19.49	High	0.005	0.02296	13783.7	4	6.6	0.02	H-2 Kb
B22	MHC-DB	High	SAIINLFHL	9		1	2	Q80YV3	TRRAP_MOUSE	Transformation/transcription domain-associated protein (Tra1 homolog)	Trrap	2565	1027.59	30.25	High	0	5.224e-06	6.9	0.01	134.1	0.4	H-2 Db
Y3	MHC-DB	High	IQTIFTTI	8		1	1	Q80YX1	TENA_MOUSE	Tenascin (TN) (Hexabrachion) (Tenascin-C) (TN-C)	Tnc Hxb	2110	936.54	19.21	High	0.009	0.02739	14154.6	4.5	956.3	1.7	H-2 Kb
B22	MHC-DB	Medium	RMCLNYEI	8	1xOxidation [M2]	1	1	Q80Z19	MUC2_MOUSE	Mucin-2 (MUC-2) (Colonic mucin) (MCM) (Secreted gel-forming mucin) (Fragments)	Muc2	2680	1057.48	19.46	Medium	0.012	0.1038	7256.9	1.9	11469.7	15	H-2 Db
Y3	MHC-DB	High	AVYQFGSAL	9		1	1	Q80ZE4	MPRA_MOUSE	Membrane progestin receptor alpha (mPR alpha) (PPAR-gamma-induced liver protein) (Progestin and adipoQ receptor family member VII)	Paqr7 Mpra Pglp	345	955.488	35.48	High	0	2.44e-12	2755.5	0.8	10.4	0.03	H-2 Kb
Y3	MHC-DB	High	SIMPFRAL	8		1	1	Q80ZJ6	ZER1_MOUSE	Protein zer-1 homolog (Zyg-11 homolog B-like protein)	Zer1 Zyg Zyg11bl	779	934.518	13.78	High	0.003	0.001219	28461.4	13	7.2	0.02	H-2 Kb
Y3	MHC-DB	Medium	AIFKKTVAM	9		1	1	Q80ZJ7	SNX32_MOUSE	Sorting nexin-32 (Sorting nexin-6B)	Snx32 Snx6b	404	1008.59	15.12	Medium	0.015	0.02739	16625.7	5	331.5	0.8	H-2 Kb
Y3	MHC-DB	High	VQYEMRTL	8		1	4	Q80ZK0	RT10_MOUSE	28S ribosomal protein S10, mitochondrial (MRP-S10) (S10mt)	Mrps10	160	1039.52	26.09	High	0.005	0.02739	9041.7	2.5	36.7	0.125	H-2 Kb
Y3	MHC-DB	High	VQYEMRTL	8	1xOxidation [M5]	1	1	Q80ZK0	RT10_MOUSE	28S ribosomal protein S10, mitochondrial (MRP-S10) (S10mt)	Mrps10	160	1055.52	14.42	High	0	2.66e-14	9041.7	2.5	36.7	0.125	H-2 Kb
B22	MHC-DB	High	NGVSNGLHL	9		1	2	Q80ZK9	WDTC1_MOUSE	WD and tetratricopeptide repeats protein 1	Wdtc1 Gm695	677	910.474	24.96	High	0.001	0.006872	316.3	0.15	14144.1	18	H-2 Db
B22	MHC-DB	High	VNYTGASIL	9		1	1	Q810B7	SLIK5_MOUSE	SLIT and NTRK-like protein 5	Slitrk5	957	937.499	21.75	High	0.002	0.0199	14612.4	4.5	178.5	0.5	H-2 Kb
B22	MHC-DB	Medium	HMENNGLHEI	10		1	3	Q810C1	SLIK1_MOUSE	SLIT and NTRK-like protein 1	Slitrk1 Sltk1	696	1193.54	24.07	Medium	0.018	0.139	5513.9	1.4	32631.2	55	H-2 Db
B22	MHC-DB	High	LSFANSIVF	9		1	2	Q810S1	MCUB_MOUSE	Calcium uniporter regulatory subunit MCUb, mitochondrial (MCUb) (Coiled-coil domain-containing protein 109B)	Ccdc109b Mcub	345	997.535	18.42	High	0.003	0.02734	1048.5	0.4	989.6	1.8	H-2 Db
B22	MHC-DB	High	TMLQNVSAEVC	11	1xOxidation [M2]	1	2	Q811F1	ZBT41_MOUSE	Zinc finger and BTB domain-containing protein 41	Zbtb41	908	1210.54	17.5	High	0.009	0.07459	3671.2	1	17571.3	23	H-2 Db
B22	MHC-DB	High	KQVIALADAI	10		1	1	Q811G0	PTHB1_MOUSE	Protein PTHB1 (Bardet-Biedl syndrome 9 protein homolog) (Parathyroid hormone-responsive B1 gene protein homolog)	Bbs9 Pthb1	885	1041.63	23.33	High	0	6.382e-05	2895	0.8	18739.6	25	H-2 Db
Y3	MHC-DB	Medium	SQYDNMTPA	9		2	2	Q811P8	RHG32_MOUSE	Rho GTPase-activating protein 32 (Brain-specific Rho GTPase-activating protein) (GAB-associated Cdc42/Rac GTPase-activating protein) (GC-GAP) (Rho-type GTPase-activating protein 32) (Rho/Cdc42/Rac GTPase-activating protein RICS) (RhoGAP involved in the beta-catenin-N-cadherin and NMDA receptor signaling) (p200RhoGAP) (p250GAP)	Arhgap32 Grit Kiaa0712 Rics	2089	1026.42	11.32	Medium	0.017	0.09212	137.3	0.08	1831.6	3	H-2 Db
B22	MHC-DB	High	ASLTSRTSM	9		1	2	Q811U4	MFN1_MOUSE	Mitofusin-1 (EC 3.6.5.-) (Transmembrane GTPase MFN1)	Mfn1	741	953.472	52.15	High	0	1.234e-06	195.7	0.125	2049.7	3.5	H-2 Db
Y3	MHC-DB	High	ASLTSRTSM	9		1	1	Q811U4	MFN1_MOUSE	Mitofusin-1 (EC 3.6.5.-) (Transmembrane GTPase MFN1)	Mfn1	741	953.472	16.01	High	0.007	0.02739	195.7	0.125	2049.7	3.5	H-2 Db
B22	MHC-DB	High	WAILNEIHI	9		1	3	Q812G0	MGT4A_MOUSE	Alpha-1,3-mannosyl-glycoprotein 4-beta-N-acetylglucosaminyltransferase A (EC 2.4.1.145) (N-glycosyl-oligosaccharide-glycoprotein N-acetylglucosaminyltransferase IVa) (GlcNAc-T IVa) (GnT-IVa) (N-acetylglucosaminyltransferase IVa) (UDP-N-acetylglucosamine: alpha-1,3-D-mannoside beta-1,4-N-acetylglucosaminyltransferase IVa) [Cleaved into: Alpha-1,3-mannosyl-glycoprotein 4-beta-N-acetylglucosaminyltr…	Mgat4a	535	1108.62	34.76	High	0	9.909e-06	21.4	0.015	1788.2	3	H-2 Db
B22	MHC-DB	High	SSVVNFQII	9		1	3	Q8BFR1	ZCCHL_MOUSE	Zinc finger CCCH-type antiviral protein 1-like	Zc3hav1l	296	1006.56	43.88	High	0	1.313e-05	8.9	0.01	279.6	0.7	H-2 Db
B22	MHC-DB	High	GLVLNSQFL	9		1	2	Q8BFS6	CPPED_MOUSE	Serine/threonine-protein phosphatase CPPED1 (EC 3.1.3.16) (Calcineurin-like phosphoesterase domain-containing protein 1)	Cpped1 Cstp1	312	990.562	29.77	High	0.003	0.03369	869.2	0.4	14947.2	19	H-2 Db
B22	MHC-DB	High	YAVGNHDFI	9		1	4	Q8BFV2	PCID2_MOUSE	PCI domain-containing protein 2 (CSN12-like protein)	Pcid2	399	1035.49	29.08	High	0	1.343e-05	3.2	0.01	10406.5	13	H-2 Db
Y3	MHC-DB	High	YAVGNHDFI	9		1	1	Q8BFV2	PCID2_MOUSE	PCI domain-containing protein 2 (CSN12-like protein)	Pcid2	399	1035.49	10.14	High	0.003	0.003654	3.2	0.01	10406.5	13	H-2 Db
Y3	MHC-DB	High	KIITYRNL	8		1	3	Q8BFV2	PCID2_MOUSE	PCI domain-containing protein 2 (CSN12-like protein)	Pcid2	399	1020.62	30.04	High	0	0.0002764	38176.1	25	7.5	0.02	H-2 Kb
Y3	MHC-DB	High	IFLILEKL	8		1	1	Q8BFV2	PCID2_MOUSE	PCI domain-containing protein 2 (CSN12-like protein)	Pcid2	399	988.644	12.56	High	0.006	0.02739	25868.4	11	933.7	1.7	H-2 Kb
B22	MHC-DB	High	AAPSNLPYL	9		1	5	Q8BFV3	DUS4_MOUSE	Dual specificity protein phosphatase 4 (EC 3.1.3.16) (EC 3.1.3.48)	Dusp4	398	945.504	35.69	High	0	0.004182	6.1	0.01	713.5	1.4	H-2 Db
Y3	MHC-DB	High	AAPSNLPYL	9		1	2	Q8BFV3	DUS4_MOUSE	Dual specificity protein phosphatase 4 (EC 3.1.3.16) (EC 3.1.3.48)	Dusp4	398	945.504	27.28	High	0.003	0.00332	6.1	0.01	713.5	1.4	H-2 Db
B22	MHC-DB	High	YQHKNLLIL	9		1	2	Q8BFY9	TNPO1_MOUSE	Transportin-1 (Importin beta-2) (Karyopherin beta-2)	Tnpo1 Kpnb2	898	1141.67	34	High	0	0.0005058	66	0.05	3788.2	5.5	H-2 Db
Y3	MHC-DB	Medium	KVSAFSRFL	9		1	1	Q8BG54	SPTC3_MOUSE	Serine palmitoyltransferase 3 (EC 2.3.1.50) (Long chain base biosynthesis protein 2b) (LCB2b) (Long chain base biosynthesis protein 3) (LCB 3) (Serine-palmitoyl-CoA transferase 3) (SPT 3)	Sptlc3 Sptlc2l	563	1054.6	10.67	Medium	0.018	0.09212	35272.6	20	878.6	1.6	H-2 Kb
B22	MHC-DB	High	SAIINEDNL	9		1	4	Q8BG67	EFR3A_MOUSE	Protein EFR3 homolog A (Protein EFR3-like)	Efr3a Kiaa0143	819	988.495	40.73	High	0	0.002528	9	0.01	1344.9	2.5	H-2 Db
B22	MHC-DB	High	RSVGLFLVGL	10		1	1	Q8BG75	TM198_MOUSE	Transmembrane protein 198	Tmem198	360	1060.65	14.65	High	0	0.005753	14296.6	4.5	795.3	1.5	H-2 Kb
Y3	MHC-DB	High	SSYAYTKV	8		1	1	Q8BG87	TET3_MOUSE	Methylcytosine dioxygenase TET3 (EC 1.14.11.n2)	Tet3	1668	918.457	26.06	High	0	6.74e-15	17928.9	6	3.7	0.01	H-2 Kb
B22	MHC-DB	High	SSYVNLYSI	9		1	1	Q8BG89	ZN365_MOUSE	Protein ZNF365 (Su48)	Znf365 Kiaa0844 Zfp365	408	1045.52	25.86	High	0	0.002017	5.5	0.01	66.7	0.2	H-2 Db
B22	MHC-DB	High	FATSNQISL	9		1	2	Q8BG94	COMD7_MOUSE	COMM domain-containing protein 7	Commd7	200	980.505	24.03	High	0	0.0005624	18.8	0.015	2678.1	4	H-2 Db
B22	MHC-DB	High	WMIVAGCFL	9	1xOxidation [M2]	1	1	Q8BGC3	MOT12_MOUSE	Monocarboxylate transporter 12 (MCT 12) (Solute carrier family 16 member 12)	Slc16a12 Mct12	486	1055.51	18.41	High	0.002	0.0158	1140.5	0.4	5084.8	7	H-2 Db
B22	MHC-DB	High	IVGINLTEM	9		1	3	Q8BGF6	ELMD2_MOUSE	ELMO domain-containing protein 2	Elmod2	293	989.534	32.85	High	0	7.156e-05	456.2	0.2	1115.6	2	H-2 Db
B22	MHC-DB	High	TSPKNAAVF	9		1	2	Q8BGF7	PAN2_MOUSE	PAB-dependent poly(A)-specific ribonuclease subunit PAN2 (EC 3.1.13.4) (Inactive ubiquitin carboxyl-terminal hydrolase 52) (PAB1P-dependent poly(A)-nuclease) (PAN deadenylation complex catalytic subunit 2)	Pan2 Kiaa0710 Usp52	1200	934.499	23.16	High	0.003	0.02998	165.5	0.1	5350.5	7	H-2 Db
Y3	MHC-DB	High	KNYDFAQVL	9		1	4	Q8BGF7	PAN2_MOUSE	PAB-dependent poly(A)-specific ribonuclease subunit PAN2 (EC 3.1.13.4) (Inactive ubiquitin carboxyl-terminal hydrolase 52) (PAB1P-dependent poly(A)-nuclease) (PAN deadenylation complex catalytic subunit 2)	Pan2 Kiaa0710 Usp52	1200	1097.56	28.88	High	0	6.05e-12	25157.9	10	29.5	0.09	H-2 Kb
B22	MHC-DB	High	FSMQDLTTI	9		1	2	Q8BGH4	REEP1_MOUSE	Receptor expression-enhancing protein 1	Reep1 D6Ertd253e	201	1055.51	27.95	High	0	7.809e-05	18.7	0.015	6976	9	H-2 Db
B22	MHC-DB	Medium	FSMQDLTTI	9	1xOxidation [M3]	1	1	Q8BGH4	REEP1_MOUSE	Receptor expression-enhancing protein 1	Reep1 D6Ertd253e	201	1071.5	10.27	Medium	0.012	0.1081	18.7	0.015	6976	9	H-2 Db
B22	MHC-DB	High	YQYTSPDFL	9		1	3	Q8BGI3	INSI1_MOUSE	Insulin-induced gene 1 protein (INSIG-1)	Insig1	259	1133.51	35.15	High	0	0.001864	65.8	0.05	5604.5	7.5	H-2 Db
B22	MHC-DB	High	ISLLNGVSL	9		1	1	Q8BGK6	YLAT2_MOUSE	Y+L amino acid transporter 2 (Solute carrier family 7 member 6) (y(+)L-type amino acid transporter 2) (Y+LAT2) (y+LAT-2)	Slc7a6 Kiaa0245	515	915.551	44.09	High	0	9.29e-07	21.3	0.015	391.3	0.9	H-2 Db
Y3	MHC-DB	High	VRYSHEKL	8		1	3	Q8BGQ7	SYAC_MOUSE	Alanine--tRNA ligase, cytoplasmic (EC 6.1.1.7) (Alanyl-tRNA synthetase) (AlaRS)	Aars	968	1031.56	26.42	High	0	3.35e-14	39885.8	29	591.2	1.2	H-2 Kb
B22	MHC-DB	Medium	TVPENQEFI	9		1	1	Q8BGT9	GLT12_MOUSE	Polypeptide N-acetylgalactosaminyltransferase 12 (EC 2.4.1.41) (Polypeptide GalNAc transferase 12) (GalNAc-T12) (pp-GaNTase 12) (Protein-UDP acetylgalactosaminyltransferase 12) (UDP-GalNAc:polypeptide N-acetylgalactosaminyltransferase 12)	Galnt12	576	1076.53	11.71	Medium	0.011	0.08878	127.8	0.08	14400.3	19	H-2 Db
B22	MHC-DB	High	SQLTNVILHL	10		1	1	Q8BGV8	MID51_MOUSE	Mitochondrial dynamics protein MID51 (Mitochondrial dynamics protein of 51 kDa homolog) (Mitochondrial elongation factor 1) (Smith-Magenis syndrome chromosomal region candidate gene 7 protein-like)	Mief1 Mid51 Smcr7l	463	1137.66	17.86	High	0	0.00569	157.5	0.09	7825.6	10	H-2 Db
B22	MHC-DB	High	AGLKNLNVVFI	11		1	2	Q8BGW5	SOSB2_MOUSE	SOSS complex subunit B2 (Nucleic acid-binding protein 1) (Oligonucleotide/oligosaccharide-binding fold-containing protein 2A) (Sensor of single-strand DNA complex subunit B2) (Sensor of ssDNA subunit B2) (SOSS-B2) (Single-stranded DNA-binding protein 2)	Nabp1 Obfc2a Ssb2	198	1187.71	18.93	High	0.001	0.009899	260.4	0.125	24970.8	37	H-2 Db
B22	MHC-DB	Medium	AGLKNLNVV	9		1	1	Q8BGW5	SOSB2_MOUSE	SOSS complex subunit B2 (Nucleic acid-binding protein 1) (Oligonucleotide/oligosaccharide-binding fold-containing protein 2A) (Sensor of single-strand DNA complex subunit B2) (Sensor of ssDNA subunit B2) (SOSS-B2) (Single-stranded DNA-binding protein 2)	Nabp1 Obfc2a Ssb2	198	927.562	10.74	Medium	0.011	0.08939	32.2	0.025	9305.7	12	H-2 Db
B22	MHC-DB	High	AAPRTNGVAM	10		1	1	Q8BGZ2	F168A_MOUSE	Protein FAM168A	Fam168a Kiaa0280	244	987.504	12.9	High	0.002	0.02374	27.8	0.02	16458.7	22	H-2 Db
Y3	MHC-DB	High	SFYEHIITV	9		1	2	Q8BGZ3	DCA12_MOUSE	DDB1- and CUL4-associated factor 12 (WD repeat-containing protein 40A)	Dcaf12 Kiaa1892 Wdr40a	453	1108.57	35.41	High	0	2.02e-10	13234.2	4	141.5	0.4	H-2 Kb
B22	MHC-DB	High	VSHPEVPL	8		1	2	Q8BH00	AL8A1_MOUSE	Aldehyde dehydrogenase family 8 member A1 (EC 1.2.1.-) (Retinal dehydrogenase 4)	Aldh8a1 Raldh4	487	877.478	11.05	High	0.002	0.02471	24539.8	9.5	414.7	0.9	H-2 Kb
Y3	MHC-DB	Medium	VSHPEVPL	8		1	1	Q8BH00	AL8A1_MOUSE	Aldehyde dehydrogenase family 8 member A1 (EC 1.2.1.-) (Retinal dehydrogenase 4)	Aldh8a1 Raldh4	487	877.478	10.25	Medium	0.016	0.04426	24539.8	9.5	414.7	0.9	H-2 Kb
Y3	MHC-DB	High	IGPYYRKL	8		1	1	Q8BH01	TMCO3_MOUSE	Transmembrane and coiled-coil domain-containing protein 3	Tmco3	678	1009.58	10.58	High	0.003	0.004361	40080	30	15	0.05	H-2 Kb
Y3	MHC-DB	Medium	ANPRLWLRL	9		1	1	Q8BH15	CNO10_MOUSE	CCR4-NOT transcription complex subunit 10	Cnot10	744	1138.68	14.32	Medium	0.018	0.09212	17968.8	6	228.4	0.6	H-2 Kb
B22	MHC-DB	Medium	SSNGYVNISEF	11		1	1	Q8BH32	SUSD4_MOUSE	Sushi domain-containing protein 4	Susd4	490	1216.55	13.32	Medium	0.011	0.09513	2631.3	0.8	4029.1	5.5	H-2 Db
Y3	MHC-DB	High	RAYRYLQL	8		1	3	Q8BH51	COX14_MOUSE	Cytochrome c oxidase assembly protein COX14	Cox14	57	1082.61	13.65	High	0.007	0.02739	15485.7	5	3.6	0.01	H-2 Kb
B22	MHC-DB	High	KSTVNKWTL	9		1	3	Q8BH57	WDR48_MOUSE	WD repeat-containing protein 48 (USP1-associated factor 1)	Wdr48 Kiaa1449 Uaf1	676	1076.61	39	High	0	9.158e-05	103.3	0.07	11621.5	15	H-2 Db
B22	MHC-DB	High	NSLLNNMEL	9		1	4	Q8BH59	CMC1_MOUSE	Calcium-binding mitochondrial carrier protein Aralar1 (Mitochondrial aspartate glutamate carrier 1) (Solute carrier family 25 member 12)	Slc25a12 Aralar1	677	1047.51	59.3	High	0	1.91e-07	125.7	0.08	4567	6.5	H-2 Db
B22	MHC-DB	High	AGIENKFGLYL	11		1	4	Q8BH59	CMC1_MOUSE	Calcium-binding mitochondrial carrier protein Aralar1 (Mitochondrial aspartate glutamate carrier 1) (Solute carrier family 25 member 12)	Slc25a12 Aralar1	677	1224.66	38.63	High	0	1.088e-05	368.5	0.175	8435.4	11	H-2 Db
Y3	MHC-DB	High	KVLVFNFL	8		1	3	Q8BH79	ANO10_MOUSE	Anoctamin-10 (Transmembrane protein 16K)	Ano10 Tmem16k	659	979.598	51.26	High	0	9.98e-16	10586.3	3	36	0.125	H-2 Kb
B22	MHC-DB	High	SAYQNHLVL	9		1	3	Q8BH79	ANO10_MOUSE	Anoctamin-10 (Transmembrane protein 16K)	Ano10 Tmem16k	659	1044.55	38.48	High	0	2.586e-05	12.3	0.01	88.5	0.25	H-2 Db
B22	MHC-DB	High	FALANEHYL	9		1	1	Q8BH82	NAPEP_MOUSE	N-acyl-phosphatidylethanolamine-hydrolyzing phospholipase D (N-acyl phosphatidylethanolamine phospholipase D) (NAPE-PLD) (NAPE-hydrolyzing phospholipase D) (EC 3.1.4.54)	Napepld Mbldc1	396	1077.54	46.4	High	0	3.467e-06	4	0.01	2107.6	3.5	H-2 Db
Y3	MHC-DB	High	IGARYVAQI	9		1	1	Q8BHB0	NOD1_MOUSE	Nucleotide-binding oligomerization domain-containing protein 1 (Caspase recruitment domain-containing protein 4)	Nod1 Card4	953	990.573	14.76	High	0.003	0.001025	30981.1	15	118.7	0.4	H-2 Kb
B22	MHC-DB	High	GSLLSDDFL	9		1	3	Q8BHE3	ATCAY_MOUSE	Caytaxin	Atcay	372	966.478	24.32	High	0	0.0004763	420.3	0.2	13415.4	17	H-2 Db
Y3	MHC-DB	High	ASYEFQREF	9		1	1	Q8BHE8	CB047_MOUSE	Uncharacterized protein C2orf47 homolog, mitochondrial		291	1176.53	35.92	High	0	9.98e-16	19847.7	6.5	78	0.25	H-2 Kb
Y3	MHC-DB	High	VIQDFVKM	8		1	2	Q8BHG9	CGBP1_MOUSE	CGG triplet repeat-binding protein 1 (CGG-binding protein 1) (20 kDa CGG-binding protein) (p20-CGGBP DNA-binding protein)	Cggbp1	167	979.528	36.92	High	0	9.98e-16	17026.5	5.5	189.8	0.5	H-2 Kb
B22	MHC-DB	High	ASLVNHVLL	9		1	2	Q8BHK9	ERC6L_MOUSE	DNA excision repair protein ERCC-6-like (EC 3.6.4.12) (ATP-dependent helicase ERCC6-like)	Ercc6l	1240	965.578	21.54	High	0	0.005047	12.5	0.01	170.2	0.5	H-2 Db
Y3	MHC-DB	High	QVLTFNLL	8		1	1	Q8BHL5	ELMO2_MOUSE	Engulfment and cell motility protein 2 (Protein ced-12 homolog A)	Elmo2 Kiaa1834	732	947.556	18.44	High	0.002	0.000932	28985.7	13	42.1	0.125	H-2 Kb
B22	MHC-DB	High	GMIINVLEL	9	1xOxidation [M2]	1	3	Q8BHL8	PSMF1_MOUSE	Proteasome inhibitor PI31 subunit	Psmf1	271	1017.56	46.93	High	0	1.001e-05	40.5	0.03	3242.8	5	H-2 Db
B22	MHC-DB	High	GMIINVLEL	9		1	3	Q8BHL8	PSMF1_MOUSE	Proteasome inhibitor PI31 subunit	Psmf1	271	1001.57	41.32	High	0	1.314e-05	40.5	0.03	3242.8	5	H-2 Db
Y3	MHC-DB	High	VNYEFGIALV	10		1	1	Q8BHN7	CL029_MOUSE	Uncharacterized protein C12orf29 homolog		327	1124.6	33.29	High	0	5.95e-06	23648.6	9	25.7	0.08	H-2 Kb
Y3	MHC-DB	High	VNYEFGIAL	9		1	3	Q8BHN7	CL029_MOUSE	Uncharacterized protein C12orf29 homolog		327	1025.53	30.96	High	0	1.03e-08	10660.3	3	8.2	0.025	H-2 Kb
Y3	MHC-DB	High	VNFSPANL	8		1	4	Q8BHX1	HAUS1_MOUSE	HAUS augmin-like complex subunit 1 (Coiled-coil domain-containing protein 5)	Haus1 Ccdc5	278	861.447	44.84	High	0	5.66e-08	36051.2	22	7	0.02	H-2 Kb
B22	MHC-DB	High	IGPKNYEFL	9		1	2	Q8BHY8	SNX14_MOUSE	Sorting nexin-14	Snx14	964	1080.57	18.89	High	0.003	0.03872	34	0.025	192.7	0.5	H-2 Db
Y3	MHC-DB	High	IGPKNYEFL	9		1	3	Q8BHY8	SNX14_MOUSE	Sorting nexin-14	Snx14	964	1080.57	23.87	High	0	9.98e-16	34	0.025	192.7	0.5	H-2 Db
B22	MHC-DB	High	QKVKNTEYL	9		1	1	Q8BHY8	SNX14_MOUSE	Sorting nexin-14	Snx14	964	1122.62	16.58	High	0.002	0.01958	798.1	0.3	17826.6	24	H-2 Db
B22	MHC-DB	High	SQPTKAEEL	9		1	1	Q8BI29	SARG_MOUSE	Specifically androgen-regulated gene protein	Sarg	606	1002.51	17.38	High	0.006	0.06236	2198.3	0.7	8222.8	11	H-2 Db
B22	MHC-DB	High	IQVTNLISDSL	11		1	3	Q8BI71	EX3L1_MOUSE	Exocyst complex component 3-like protein	Exoc3l1 Exoc3l	739	1202.66	64.77	High	0	4.59e-08	610.3	0.25	10687.3	14	H-2 Db
B22	MHC-DB	High	GALAGWLEAL	10		1	2	Q8BI71	EX3L1_MOUSE	Exocyst complex component 3-like protein	Exoc3l1 Exoc3l	739	1000.55	20.48	High	0.004	0.04585	6292.7	1.6	14593.2	19	H-2 Db
Y3	MHC-DB	High	AFSFTTSL	8		1	1	Q8BI99	ZN879_MOUSE	Zinc finger protein 879	Znf879 Zfp879	563	873.435	23.06	High	0.003	0.001032	17973.8	6	487.6	1.1	H-2 Kb
B22	MHC-DB	High	SAMRNLNGREF	11		1	1	Q8BIQ5	CSTF2_MOUSE	Cleavage stimulation factor subunit 2 (CF-1 64 kDa subunit) (Cleavage stimulation factor 64 kDa subunit) (CSTF 64 kDa subunit) (CstF-64)	Cstf2	580	1294.63	15.08	High	0	0.0009315	1001.6	0.4	10787.8	14	H-2 Db
B22	MHC-DB	High	FQWRNLNTI	9		1	3	Q8BIR2	ASTE1_MOUSE	Protein asteroid homolog 1	Aste1	672	1191.63	32.84	High	0	0.0003533	13.7	0.01	3357.6	5	H-2 Db
Y3	MHC-DB	High	KILPWFEQL	9		1	2	Q8BIV3	RNBP6_MOUSE	Ran-binding protein 6 (RanBP6)	Ranbp6	1105	1173.67	26.82	High	0	9.98e-16	21441.6	7.5	108.6	0.3	H-2 Kb
B22	MHC-DB	High	SQTRNHIQTL	10		2	2	Q8BIW9	CTF18_MOUSE	Chromosome transmission fidelity protein 18 homolog	Chtf18 Ctf18	969	1197.63	24.01	High	0	9.995e-05	622.7	0.25	8411.3	11	H-2 Db
Y3	MHC-DB	High	AVFQYRLV	8		1	1	Q8BIZ6	SNIP1_MOUSE	Smad nuclear-interacting protein 1	Snip1	383	995.567	11.26	High	0	0.000932	31495.5	16	16.1	0.05	H-2 Kb
B22	MHC-DB	High	FKILNHDMT	9		1	3	Q8BJ03	COX15_MOUSE	Cytochrome c oxidase assembly protein COX15 homolog	Cox15	413	1118.57	10.93	High	0.003	0.02791	4312.7	1.1	19538.1	26	H-2 Db
B22	MHC-DB	High	NARLVQMEVL	10	1xOxidation [M7]	1	1	Q8BJ71	NUP93_MOUSE	Nuclear pore complex protein Nup93 (93 kDa nucleoporin) (CBP-interacting protein 4) (Nucleoporin Nup93)	Nup93 Cip4 Kiaa0095	819	1188.64	25.89	High	0.001	0.009135	6387.1	1.7	25477.3	38	H-2 Db
B22	MHC-DB	High	AAFRNFSDEI	10		1	1	Q8BJ71	NUP93_MOUSE	Nuclear pore complex protein Nup93 (93 kDa nucleoporin) (CBP-interacting protein 4) (Nucleoporin Nup93)	Nup93 Cip4 Kiaa0095	819	1169.56	19.84	High	0	0.0002098	44.8	0.04	786.8	1.5	H-2 Db
Y3	MHC-DB	High	SAPRYMAL	8		1	1	Q8BJG4	MOB3C_MOUSE	MOB kinase activator 3C (Mob1 homolog 2C) (Mps one binder kinase activator-like 2C)	Mob3c Mobkl2c	216	908.466	14.9	High	0.005	0.02296	13003.7	4	4.3	0.01	H-2 Kb
B22	MHC-DB	High	AGLVNIVSF	9		1	2	Q8BJL0	SMAL1_MOUSE	SWI/SNF-related matrix-associated actin-dependent regulator of chromatin subfamily A-like protein 1 (EC 3.6.4.-) (HepA-related protein) (mharp) (Sucrose nonfermenting protein 2-like 1)	Smarcal1 Harp	910	919.525	28.15	High	0.001	0.008581	167	0.1	2887.4	4.5	H-2 Db
B22	MHC-DB	High	KIGYNQELI	9		1	2	Q8BJL0	SMAL1_MOUSE	SWI/SNF-related matrix-associated actin-dependent regulator of chromatin subfamily A-like protein 1 (EC 3.6.4.-) (HepA-related protein) (mharp) (Sucrose nonfermenting protein 2-like 1)	Smarcal1 Harp	910	1077.59	16.88	High	0.002	0.01612	6343.9	1.6	7563.7	10	H-2 Db
Y3	MHC-DB	High	LSLLCNQPV	9		1	1	Q8BJS7	MAP10_MOUSE	Microtubule-associated protein 10 (Microtubule regulator of 120 KDa)	Map10 Kiaa1383	891	986.534	27.09	High	0.006	0.02739	4715.8	1.3	1583.2	3	H-2 Db
B22	MHC-DB	High	GGVRNGVAL	9		1	4	Q8BJW5	NOL11_MOUSE	Nucleolar protein 11	Nol11	723	842.484	37.87	High	0	0.0005939	98.6	0.06	13696.9	18	H-2 Db
Y3	MHC-DB	High	GGVRNGVAL	9		1	3	Q8BJW5	NOL11_MOUSE	Nucleolar protein 11	Nol11	723	842.484	38.61	High	0.005	0.02739	98.6	0.06	13696.9	18	H-2 Db
Y3	MHC-DB	High	IAVSFREL	8		1	3	Q8BJW5	NOL11_MOUSE	Nucleolar protein 11	Nol11	723	934.536	33.88	High	0	0.0007794	16162	5	10.8	0.03	H-2 Kb
Y3	MHC-DB	High	SVFAFGENKM	10		1	4	Q8BK67	RCC2_MOUSE	Protein RCC2	Rcc2 Kiaa1470	520	1129.53	44.97	High	0	9.98e-16	12394.9	3.5	377.8	0.9	H-2 Kb
Y3	MHC-DB	High	SVFAFGENKM	10	1xOxidation [M10]	1	1	Q8BK67	RCC2_MOUSE	Protein RCC2	Rcc2 Kiaa1470	520	1145.53	26.94	High	0.003	0.003654	12394.9	3.5	377.8	0.9	H-2 Kb
B22	MHC-DB	Medium	FMPSLKHIV	9	1xOxidation [M2]	1	1	Q8BKC5	IPO5_MOUSE	Importin-5 (Imp5) (Importin subunit beta-3) (Karyopherin beta-3) (Ran-binding protein 5) (RanBP5)	Ipo5 Kpnb3 Ranbp5	1097	1087.6	10.55	Medium	0.027	0.1821	4006.1	1.1	6629.6	8.5	H-2 Db
Y3	MHC-DB	High	RGPEYLTQM	9		1	1	Q8BKC5	IPO5_MOUSE	Importin-5 (Imp5) (Importin subunit beta-3) (Karyopherin beta-3) (Ran-binding protein 5) (RanBP5)	Ipo5 Kpnb3 Ranbp5	1097	1094.53	23.14	High	0.003	0.003654	12571.6	3.5	523.1	1.1	H-2 Kb
B22	MHC-DB	High	MAIGKRLATL	10		1	1	Q8BKC8	PI4KB_MOUSE	Phosphatidylinositol 4-kinase beta (PI4K-beta) (PI4Kbeta) (PtdIns 4-kinase beta) (EC 2.7.1.67)	Pi4kb Pik4cb	816	1073.65	18.39	High	0.001	0.006193	11861.7	3.5	1104	1.9	H-2 Kb
B22	MHC-DB	Medium	AVVFANGSLL	10		1	1	Q8BKG3	PTK7_MOUSE	Inactive tyrosine-protein kinase 7 (Protein chuzhoi) (Protein-tyrosine kinase 7) (Pseudo tyrosine kinase receptor 7) (Tyrosine-protein kinase-like 7)	Ptk7	1062	990.562	17.11	Medium	0.035	0.224	2886	0.8	1184.8	2	H-2 Db
B22	MHC-DB	High	HSLVHKVFL	9		1	1	Q8BKS9	PUM3_MOUSE	Pumilio homolog 3	Pum3 D19Bwg1357e Kiaa0020	647	1079.64	13.37	High	0	0.0009706	557.1	0.25	1326.4	2.5	H-2 Db
Y3	MHC-DB	Medium	MGLTFINAL	9		1	1	Q8BL03	MCATL_MOUSE	Mitochondrial basic amino acids transporter (Carnitine/acylcarnitine translocase-like) (CACT-like) (Mitochondrial carnitine/acylcarnitine carrier protein CACL) (Mitochondrial ornithine transporter 3) (Solute carrier family 25 member 29)	Slc25a29 Ornt3	306	979.528	11.44	Medium	0.025	0.1211	6037.4	1.6	46.7	0.15	H-2 Kb
Y3	MHC-DB	High	ATAFFLSL	8		1	1	Q8BL97	SRSF7_MOUSE	Serine/arginine-rich splicing factor 7 (Splicing factor, arginine/serine-rich 7)	Srsf7 Sfrs7	267	869.477	11.07	High	0.003	0.003654	27412.4	12	233.5	0.6	H-2 Kb
Y3	MHC-DB	Medium	VSDLFVAL	8		1	1	Q8BLD9	DRD5_MOUSE	D(1B) dopamine receptor (D(5) dopamine receptor) (Dopamine D5 receptor)	Drd5	478	863.487	16.28	Medium	0.017	0.09212	27847.3	12	22.1	0.07	H-2 Kb
Y3	MHC-DB	Medium	ESPSYRTL	8		1	2	Q8BLG0	PHF20_MOUSE	PHD finger protein 20 (Hepatocellular carcinoma-associated antigen 58 homolog)	Phf20 Hca58	1010	952.473	18.93	Medium	0.041	0.3489	39247.5	28	637.4	1.3	H-2 Kb
Y3	MHC-DB	High	TNLVYPAL	8		1	4	Q8BLR9	HIF1N_MOUSE	Hypoxia-inducible factor 1-alpha inhibitor (EC 1.14.11.30) (EC 1.14.11.n4) (Hypoxia-inducible factor asparagine hydroxylase)	Hif1an	349	890.498	38.41	High	0	1.24e-09	30314	14	10.4	0.03	H-2 Kb
Y3	MHC-DB	High	YTWVRGWEM	9		1	1	Q8BLX4	FUCT1_MOUSE	GDP-fucose transporter 1 (Solute carrier family 35 member C1)	Slc35c1 Fuct1	363	1227.56	20.85	High	0	6.65e-08	7099.4	1.8	5631	7.5	H-2 Db
Y3	MHC-DB	High	AQYNFILV	8		1	2	Q8BLY2	SYTC2_MOUSE	Probable threonine--tRNA ligase 2, cytoplasmic (EC 6.1.1.3) (Threonyl-tRNA synthetase) (ThrRS) (Threonyl-tRNA synthetase-like protein 2)	Tarsl2	790	967.525	30.06	High	0.003	0.001109	5390.1	1.4	25.3	0.08	H-2 Kb
B22	MHC-DB	High	TSPTNSQQL	9		1	3	Q8BM75	ARI5B_MOUSE	AT-rich interactive domain-containing protein 5B (ARID domain-containing protein 5B) (Developmentally and sexually retarded with transient immune abnormalities protein) (Desrt) (MRF1-like) (Modulator recognition factor protein 2) (MRF-2)	Arid5b Desrt Mrf2	1188	975.474	37.15	High	0	0.0001844	121.1	0.08	1590.8	3	H-2 Db
Y3	MHC-DB	High	RIILFDRL	8		1	1	Q8BM85	TBCK_MOUSE	TBC domain-containing protein kinase-like protein	Tbck	762	1045.65	26.07	High	0	4.78e-08	25085.1	10	29	0.09	H-2 Kb
B22	MHC-DB	High	SMEQNLLVL	9		1	1	Q8BMA5	NPAT_MOUSE	Protein NPAT	Npat	1420	1046.56	17.14	High	0	0.002552	168.8	0.1	4125.7	6	H-2 Db
B22	MHC-DB	High	TGIRNLEWL	9		1	4	Q8BMD6	TM260_MOUSE	Transmembrane protein 260	Tmem260	703	1101.61	31.68	High	0	0.0001838	12.2	0.01	6794.2	9	H-2 Db
Y3	MHC-DB	High	TGIRNLEWL	9		1	1	Q8BMD6	TM260_MOUSE	Transmembrane protein 260	Tmem260	703	1101.61	31.6	High	0	0.0001528	12.2	0.01	6794.2	9	H-2 Db
Y3	MHC-DB	High	GVFSFSRL	8		1	2	Q8BMD6	TM260_MOUSE	Transmembrane protein 260	Tmem260	703	912.494	39.95	High	0	1.71e-10	29205.8	13	9.4	0.025	H-2 Kb
B22	MHC-DB	High	FGIKNFSAI	9		2	1	Q8BMF4	ODP2_MOUSE	Dihydrolipoyllysine-residue acetyltransferase component of pyruvate dehydrogenase complex, mitochondrial (EC 2.3.1.12) (Dihydrolipoamide acetyltransferase component of pyruvate dehydrogenase complex) (Pyruvate dehydrogenase complex component E2) (PDC-E2) (PDCE2)	Dlat	642	996.551	31.48	High	0	0.0003348	6.6	0.01	463.6	1	H-2 Db
B22	MHC-DB	High	FQVQDKEVL	9		1	1	Q8BMG7	RBGPR_MOUSE	Rab3 GTPase-activating protein non-catalytic subunit (Rab3 GTPase-activating protein 150 kDa subunit) (Rab3-GAP p150) (Rab3-GAP150) (Rab3-GAP regulatory subunit)	Rab3gap2 Kiaa0839	1366	1105.59	27.86	High	0	0.0002948	1487.6	0.5	31726	55	H-2 Db
B22	MHC-DB	High	IANINQELI	9		1	1	Q8BMI0	FBX38_MOUSE	F-box only protein 38 (Modulator of KLF7 activity) (MoKA)	Fbxo38	1194	1027.58	31.21	High	0	4.555e-05	22.4	0.015	4822	6.5	H-2 Db
B22	MHC-DB	High	ASARNLEHL	9		1	2	Q8BMI0	FBX38_MOUSE	F-box only protein 38 (Modulator of KLF7 activity) (MoKA)	Fbxo38	1194	1010.54	22.55	High	0.001	0.005961	61.3	0.04	1931.7	3	H-2 Db
Y3	MHC-DB	Medium	ASARNLEHL	9		1	1	Q8BMI0	FBX38_MOUSE	F-box only protein 38 (Modulator of KLF7 activity) (MoKA)	Fbxo38	1194	1010.54	10.06	Medium	0.014	0.02739	61.3	0.04	1931.7	3	H-2 Db
Y3	MHC-DB	High	SAFSFRTL	8		1	4	Q8BMI0	FBX38_MOUSE	F-box only protein 38 (Modulator of KLF7 activity) (MoKA)	Fbxo38	1194	928.489	36.29	High	0	0.000932	7246.7	1.9	3.3	0.01	H-2 Kb
Y3	MHC-DB	High	VTFPYPYM	8		1	1	Q8BMJ2	SYLC_MOUSE	Leucine--tRNA ligase, cytoplasmic (EC 6.1.1.4) (Leucyl-tRNA synthetase) (LeuRS)	Lars	1178	1017.48	10.43	High	0.005	0.02548	10536.4	3	5.2	0.015	H-2 Kb
B22	MHC-DB	High	LSILNSNEHLL	11		1	1	Q8BMK0	CEP85_MOUSE	Centrosomal protein of 85 kDa (Cep85) (Coiled-coil domain-containing protein 21)	Cep85 Ccdc21	761	1252.69	17.6	High	0	0.0007453	1855.6	0.6	7816.8	10	H-2 Db
B22	MHC-DB	High	LSILNSNEHL	10		1	4	Q8BMK0	CEP85_MOUSE	Centrosomal protein of 85 kDa (Cep85) (Coiled-coil domain-containing protein 21)	Cep85 Ccdc21	761	1139.61	57.91	High	0	8.275e-05	421.4	0.2	4826.2	6.5	H-2 Db
B22	MHC-DB	High	GNVTNITTV	9		1	3	Q8BMT4	NRROS_MOUSE	Negative regulator of reactive oxygen species (Leucine-rich repeat-containing protein 33)	Nrros Lrrc33	693	918.489	48.32	High	0	3.616e-05	113.4	0.07	10526.3	14	H-2 Db
Y3	MHC-DB	High	RSYRFMVM	8		1	3	Q8BN21	VRK2_MOUSE	Serine/threonine-protein kinase VRK2 (EC 2.7.11.1) (Vaccinia-related kinase 2)	Vrk2	503	1089.53	17.16	High	0.005	0.02296	6935.3	1.8	4.6	0.01	H-2 Kb
B22	MHC-DB	High	YSFPNVALI	9		1	1	Q8BND3	WDR35_MOUSE	WD repeat-containing protein 35	Wdr35	1181	1023.55	24.58	High	0	0.0003885	17.5	0.01	242	0.6	H-2 Db
Y3	MHC-DB	Medium	RAFELLEL	8		1	1	Q8BNN1	SPA2L_MOUSE	Spermatogenesis-associated protein 2-like protein (SPATA2-like protein)	Spata2l Kiaa4138	426	990.562	19.83	Medium	0.045	0.3733	9701.7	3	442.6	1	H-2 Kb
B22	MHC-DB	High	AAPFDTVHI	9		1	8	Q8BNV1	TRM2A_MOUSE	tRNA (uracil-5-)-methyltransferase homolog A (EC 2.1.1.-) (HpaII tiny fragments locus 9c protein)	Trmt2a Htf9-c Htf9c	574	970.499	26.43	High	0.002	0.01348	700.1	0.3	9503.5	12	H-2 Db
B22	MHC-DB	High	GALKNGQNL	9		1	2	Q8BP56	ATHL1_MOUSE	Acid trehalase-like protein 1 (EC 3.2.1.-)	Athl1	690	914.505	24.54	High	0	0.005295	109.8	0.07	7541.8	10	H-2 Db
Y3	MHC-DB	High	KVFQFLNA	8		1	2	Q8BP67	RL24_MOUSE	60S ribosomal protein L24	Rpl24	157	966.541	32.2	High	0	1.657e-05	27973.3	12	143.9	0.4	H-2 Kb
Y3	MHC-DB	Medium	SFKHYAMQE	9	1xOxidation [M7]	1	1	Q8BP92	RCN2_MOUSE	Reticulocalbin-2 (Taipoxin-associated calcium-binding protein 49) (TCBP-49)	Rcn2	320	1156.51	10.45	Medium	0.015	0.02739	48963	99	14109	18	H-2 Kb
B22	MHC-DB	High	SAPKYIDYL	9		1	3	Q8BPB0	MOB1B_MOUSE	MOB kinase activator 1B (Mob1 homolog 1A) (Mps one binder kinase activator-like 1A)	Mob1b Mobkl1a	216	1069.56	22.9	High	0	0.0003032	324.3	0.15	136	0.4	H-2 Db
Y3	MHC-DB	Medium	SAPKYIDYL	9		1	1	Q8BPB0	MOB1B_MOUSE	MOB kinase activator 1B (Mob1 homolog 1A) (Mps one binder kinase activator-like 1A)	Mob1b Mobkl1a	216	1069.56	15.37	Medium	0.015	0.02739	324.3	0.15	136	0.4	H-2 Db
Y3	MHC-DB	Medium	AFSFQNPL	8		1	2	Q8BPI1	KTU_MOUSE	Protein kintoun (Dynein assembly factor 2, axonemal)	Dnaaf2 Ktu	814	923.462	27.5	Medium	0.036	0.3489	11087.7	3	297.9	0.7	H-2 Kb
B22	MHC-DB	High	SALANYIHL	9		1	4	Q8BPS4	GP180_MOUSE	Integral membrane protein GPR180	Gpr180 MNCb-3029	441	1001.54	48.13	High	0	6.248e-06	6.3	0.01	21.6	0.07	H-2 Db
B22	MHC-DB	High	VSPKNPEQKI	10		1	2	Q8BPT6	IMP2L_MOUSE	Mitochondrial inner membrane protease subunit 2 (EC 3.4.21.-) (IMP2-like protein)	Immp2l	175	1139.64	26.98	High	0	0.002162	767.4	0.3	17632.1	23	H-2 Db
B22	MHC-DB	High	IAVINALFL	9		1	2	Q8BPU7	ELMO1_MOUSE	Engulfment and cell motility protein 1 (Protein ced-12 homolog)	Elmo1	727	973.608	38.46	High	0	2.899e-05	11.6	0.01	1280.9	2.5	H-2 Db
B22	MHC-DB	High	WSLANHEYF	9		1	2	Q8BPU7	ELMO1_MOUSE	Engulfment and cell motility protein 1 (Protein ced-12 homolog)	Elmo1	727	1166.53	22.76	High	0	0.002174	28	0.02	3111	4.5	H-2 Db
B22	MHC-DB	High	IQIPDAPPPI	10		1	1	Q8BPU7	ELMO1_MOUSE	Engulfment and cell motility protein 1 (Protein ced-12 homolog)	Elmo1	727	1060.6	11.62	High	0.002	0.02298	7064.7	1.8	20590.1	28	H-2 Db
B22	MHC-DB	High	SAIIDSDNV	9		1	1	Q8BPY9	FIGL1_MOUSE	Fidgetin-like protein 1 (EC 3.6.4.-)	Fignl1	683	933.452	14.65	High	0	0.002933	472.8	0.2	7832.1	10	H-2 Db
Y3	MHC-DB	Medium	FSSPNFPSL	9		1	1	Q8BQH6	CDCP2_MOUSE	CUB domain-containing protein 2	Cdcp2	427	995.483	16.83	Medium	0.015	0.03009	1083	0.4	475.5	1	H-2 Db
B22	MHC-DB	High	VSLLDIDHL	9		1	4	Q8BQM4	HEAT3_MOUSE	HEAT repeat-containing protein 3	Heatr3	679	1024.57	32.43	High	0	0.000462	521.7	0.25	1708.2	3	H-2 Db
Y3	MHC-DB	High	SLISNEEQF	9		1	1	Q8BQP8	RFIP4_MOUSE	Rab11 family-interacting protein 4 (FIP4-Rab11) (Rab11-FIP4) (mRab11-FIP4A)	Rab11fip4 Kiaa1821	635	1066.51	24.28	High	0.003	0.02011	3078.3	0.9	7362	9.5	H-2 Db
B22	MHC-DB	High	SQVNNAVLL	9		1	2	Q8BQX5	TMCO6_MOUSE	Transmembrane and coiled-coil domain-containing protein 6	Tmco6	494	957.536	20.25	High	0	0.004649	29.2	0.02	1654.9	3	H-2 Db
B22	MHC-DB	High	RNISNQLVI	9		2	1	Q8BQY8	HUS1_MOUSE	Checkpoint protein HUS1 (mHUS1)	Hus1	280	1056.62	25.92	High	0	0.0006206	70.2	0.05	5760.5	7.5	H-2 Db
B22	MHC-DB	High	VSLNNLIYV	9		1	2	Q8BRG6	KLH24_MOUSE	Kelch-like protein 24 (Kainate receptor-interacting protein for GluR6) (KRIP6)	Klhl24	600	1034.59	12.08	High	0.009	0.07445	15.8	0.01	130.1	0.4	H-2 Db
Y3	MHC-DB	High	IWIRVASL	8		1	3	Q8BRG6	KLH24_MOUSE	Kelch-like protein 24 (Kainate receptor-interacting protein for GluR6) (KRIP6)	Klhl24	600	957.588	34.03	High	0.003	0.003654	35669.4	21	44.9	0.15	H-2 Kb
B22	MHC-DB	High	FSELNSTEM	9		1	2	Q8BRN9	C2D1B_MOUSE	Coiled-coil and C2 domain-containing protein 1B (Five prime repressor element under dual repression-binding protein 2) (FRE under dual repression-binding protein 2) (Freud-2)	Cc2d1b Kiaa1836	848	1057.45	20.62	High	0	0.001027	41.7	0.03	6070.3	8	H-2 Db
Y3	MHC-DB	High	SNYRVSLL	8		1	1	Q8BRT1	CLAP2_MOUSE	CLIP-associating protein 2 (Cytoplasmic linker-associated protein 2)	Clasp2 Kiaa0627	1286	951.526	18.53	High	0	0.000932	30186.6	14	8.5	0.025	H-2 Kb
B22	MHC-DB	High	SRLELVDYL	9		1	1	Q8BSN9	FAKD3_MOUSE	FAST kinase domain-containing protein 3, mitochondrial	Fastkd3	661	1107.6	13.8	High	0	0.002319	3982.7	1.1	7886.9	10	H-2 Db
Y3	MHC-DB	High	SAYLKMLSSSL	11		1	1	Q8BTC1	CL073_MOUSE	Uncharacterized protein C12orf73 homolog		67	1199.63	47.6	High	0	9.98e-16	8900.6	2.5	238.3	0.6	H-2 Kb
B22	MHC-DB	Medium	VAGENARVI	9		1	1	Q8BTF8	RALYL_MOUSE	RNA-binding Raly-like protein	Ralyl	293	928.521	17.27	Medium	0.04	0.2423	209.1	0.125	7828.9	10	H-2 Db
B22	MHC-DB	High	SSLSNEHVL	9		1	2	Q8BTI7	ANR52_MOUSE	Serine/threonine-protein phosphatase 6 regulatory ankyrin repeat subunit C (PP6-ARS-C) (Serine/threonine-protein phosphatase 6 regulatory subunit ARS-C)	Ankrd52	1076	985.495	30.63	High	0	0.0004532	7.2	0.01	2289.5	3.5	H-2 Db
B22	MHC-DB	High	SAPTNTGSTGL	11		1	4	Q8BTS4	NUP54_MOUSE	Nuclear pore complex protein Nup54 (54 kDa nucleoporin) (Nucleoporin Nup54)	Nup54	510	1005.48	57.57	High	0	1.28e-07	604.1	0.25	12746.1	16	H-2 Db
B22	MHC-DB	High	MGNENYTAEVL	11		1	1	Q8BTY8	SCFD2_MOUSE	Sec1 family domain-containing protein 2 (Neuronal Sec1) (Syntaxin-binding protein 1-like 1)	Scfd2 Stxbp1l1	684	1240.55	16.72	High	0.004	0.04134	3154.1	0.9	12138.7	16	H-2 Db
B22	MHC-DB	Medium	AVEENQNVI	9		1	2	Q8BTY8	SCFD2_MOUSE	Sec1 family domain-containing protein 2 (Neuronal Sec1) (Syntaxin-binding protein 1-like 1)	Scfd2 Stxbp1l1	684	1015.51	11.83	Medium	0.048	0.284	4584.4	1.2	22261.7	31	H-2 Db
Y3	MHC-DB	High	FAYRFSNL	8		1	3	Q8BU03	PWP2_MOUSE	Periodic tryptophan protein 2 homolog	Pwp2 Pwp2h	919	1017.52	26.44	High	0	0.000932	4123	1.1	2	0.01	H-2 Kb
B22	MHC-DB	High	ASLRDKDTL	9		1	2	Q8BU30	SYIC_MOUSE	Isoleucine--tRNA ligase, cytoplasmic (EC 6.1.1.5) (Isoleucyl-tRNA synthetase) (IRS) (IleRS)	Iars	1262	1018.55	28.15	High	0	0.0002191	211.6	0.125	12344.8	16	H-2 Db
B22	MHC-DB	High	WSPTNLAYF	9		1	3	Q8BUI3	LRWD1_MOUSE	Leucine-rich repeat and WD repeat-containing protein 1 (ORC-associated protein) (ORCA) (Origin recognition complex-associated protein)	LRWD1 Orca	648	1098.53	27.99	High	0	0.000815	35.4	0.025	929.4	1.7	H-2 Db
Y3	MHC-DB	High	WSPTNLAYF	9		1	1	Q8BUI3	LRWD1_MOUSE	Leucine-rich repeat and WD repeat-containing protein 1 (ORC-associated protein) (ORCA) (Origin recognition complex-associated protein)	LRWD1 Orca	648	1098.53	21.07	High	0.006	0.02739	35.4	0.025	929.4	1.7	H-2 Db
B22	MHC-DB	High	NTVTNKVTL	9		1	1	Q8BUR3	FOXJ3_MOUSE	Forkhead box protein J3	Foxj3 Kiaa1041	623	989.563	22.48	High	0.001	0.009381	166.1	0.1	8144.7	11	H-2 Db
B22	MHC-DB	High	HGAMNQQHM	9		1	2	Q8BUR3	FOXJ3_MOUSE	Forkhead box protein J3	Foxj3 Kiaa1041	623	1053.44	30.93	High	0	0.003361	763.4	0.3	15819	21	H-2 Db
B22	MHC-DB	High	YAHENDITHF	10		1	1	Q8BVE8	NSD2_MOUSE	Histone-lysine N-methyltransferase NSD2 (EC 2.1.1.43) (Multiple myeloma SET domain-containing protein) (MMSET) (Nuclear SET domain-containing protein 2) (NSD2) (Wolf-Hirschhorn syndrome candidate 1 protein homolog) (WHSC1)	Whsc1 Kiaa1090 Nsd2	1365	1246.55	24.83	High	0	9.772e-05	142.1	0.08	12563.9	16	H-2 Db
Y3	MHC-DB	Medium	QIMAQNDILLL	11	1xOxidation [M3]	1	1	Q8BVF4	CCD30_MOUSE	Coiled-coil domain-containing protein 30 (Prefoldin subunit 6-like protein)	Ccdc30 Pfdn6l	654	1287.7	12.53	Medium	0.038	0.3489	6187.4	1.6	12343.8	16	H-2 Db
B22	MHC-DB	High	AQTSNSQEI	9		1	2	Q8BVK9	SP110_MOUSE	Sp110 nuclear body protein (Intracellular pathogen resistance protein 1)	Sp110 Ifi75 Ipr1	445	977.453	38.72	High	0	4.106e-05	200.1	0.125	18762.5	25	H-2 Db
Y3	MHC-DB	High	VNLREYPSL	9		1	3	Q8BVK9	SP110_MOUSE	Sp110 nuclear body protein (Intracellular pathogen resistance protein 1)	Sp110 Ifi75 Ipr1	445	1090.59	36.79	High	0	9.98e-16	22598.8	8	25.2	0.08	H-2 Kb
Y3	MHC-DB	Medium	KQNVDGLVL	9		1	1	Q8BVR6	RSPRY_MOUSE	RING finger and SPRY domain-containing protein 1	Rspry1 Kiaa1972	576	985.568	11.64	Medium	0.044	0.3591	7076.7	1.8	26244.2	39	H-2 Db
Y3	MHC-DB	High	GQTPLFYAGGI	11		1	1	Q8BW49	TTC12_MOUSE	Tetratricopeptide repeat protein 12 (TPR repeat protein 12)	Ttc12	704	1123.58	14.63	High	0.003	0.003654	27717.5	12	720	1.4	H-2 Kb
B22	MHC-DB	High	ASLQNAEKT	9		1	1	Q8BW70	UBP38_MOUSE	Ubiquitin carboxyl-terminal hydrolase 38 (EC 3.4.19.12) (Deubiquitinating enzyme 38) (Ubiquitin thioesterase 38) (Ubiquitin-specific-processing protease 38)	Usp38	1042	961.495	17.73	High	0.001	0.006125	385.4	0.175	24135.9	35	H-2 Db
Y3	MHC-DB	High	VIVPHIVNL	9		1	3	Q8BW70	UBP38_MOUSE	Ubiquitin carboxyl-terminal hydrolase 38 (EC 3.4.19.12) (Deubiquitinating enzyme 38) (Ubiquitin thioesterase 38) (Ubiquitin-specific-processing protease 38)	Usp38	1042	1003.63	23.4	High	0.001	0.000932	27456.3	12	91	0.25	H-2 Kb
Y3	MHC-DB	High	KIFEFKETL	9		1	8	Q8BW96	KCC1D_MOUSE	Calcium/calmodulin-dependent protein kinase type 1D (EC 2.7.11.17) (CaM kinase I delta) (CaM-KI delta) (CaMKI delta) (CaM kinase ID) (CaMKI-like protein kinase) (CKLiK) (mCKLiK)	Camk1d	385	1154.65	40.84	High	0	9.98e-16	10539.9	3	63.4	0.2	H-2 Kb
Y3	MHC-DB	High	SALRFARL	8		1	2	Q8BWY3	ERF1_MOUSE	Eukaryotic peptide chain release factor subunit 1 (Eukaryotic release factor 1) (eRF1)	Etf1	437	933.563	17.7	High	0.009	0.02739	15754.4	5	2.2	0.01	H-2 Kb
B22	MHC-DB	High	IGIQNFPEGL	10		1	3	Q8BWY7	S39AB_MOUSE	Zinc transporter ZIP11 (Solute carrier family 39 member 11) (Zrt- and Irt-like protein 11) (ZIP-11)	Slc39a11 Zip11	342	1087.58	32.92	High	0	0.001548	471	0.2	679	1.3	H-2 Db
B22	MHC-DB	Medium	NSLASLLEL	9		1	1	Q8BWZ3	NAA25_MOUSE	N-alpha-acetyltransferase 25, NatB auxiliary subunit (Mitochondrial distribution and morphology protein 20) (N-terminal acetyltransferase B complex subunit MDM20) (NatB complex subunit MDM20) (N-terminal acetyltransferase B complex subunit NAA25)	Naa25 Mdm20	972	959.541	13.16	Medium	0.033	0.213	2022.4	0.6	4237.9	6	H-2 Db
B22	MHC-DB	High	TVISNAVDHI	10		1	2	Q8BWZ3	NAA25_MOUSE	N-alpha-acetyltransferase 25, NatB auxiliary subunit (Mitochondrial distribution and morphology protein 20) (N-terminal acetyltransferase B complex subunit MDM20) (NatB complex subunit MDM20) (N-terminal acetyltransferase B complex subunit NAA25)	Naa25 Mdm20	972	1068.57	36.12	High	0	2.952e-05	489	0.25	9672.3	13	H-2 Db
B22	MHC-DB	High	LWVLNSDSL	9		1	1	Q8BX13	UBE3D_MOUSE	E3 ubiquitin-protein ligase E3D (EC 6.3.2.-) (UbcH10-binding protein with a HECT-like domain) (Ubiquitin-conjugating enzyme E2C-binding protein)	Ube3d H10bh Ube2cbp	368	1046.55	14.95	High	0.005	0.05478	6059	1.6	1561.7	2.5	H-2 Db
B22	MHC-DB	High	GSPSNKDSL	9		1	3	Q8BX22	SALL4_MOUSE	Sal-like protein 4 (Zinc finger protein SALL4)	Sall4	1067	904.437	29.28	High	0.006	0.05999	52.9	0.04	13962.3	18	H-2 Db
Y3	MHC-DB	High	VNYKMKSV	8		1	1	Q8BXA5	CLP1L_MOUSE	Cleft lip and palate transmembrane protein 1-like protein (CLPTM1-like protein)	Clptm1l	539	968.523	19.79	High	0.003	0.001295	39260.2	28	86.6	0.25	H-2 Kb
B22	MHC-DB	High	AGPGNHVQL	9		1	1	Q8BXJ2	TREF1_MOUSE	Transcriptional-regulating factor 1 (Transcriptional-regulating protein 132) (Zinc finger transcription factor TReP-132)	Trerf1	1205	892.464	37.02	High	0	2.521e-05	994.1	0.4	2586.9	4	H-2 Db
Y3	MHC-DB	Medium	IAELEANL	8		1	1	Q8BXX9	CC169_MOUSE	Coiled-coil domain-containing protein 169	Ccdc169	214	872.472	17.98	Medium	0.024	0.1123	36564.3	22	1096.4	1.9	H-2 Kb
Y3	MHC-DB	High	YVYERMTGL	9		1	1	Q8BY02	NKRF_MOUSE	NF-kappa-B-repressing factor (NFkB-repressing factor) (Transcription factor NRF)	Nkrf Nrf	690	1131.55	29.37	High	0	1.6e-09	19159.9	6.5	39.1	0.125	H-2 Kb
Y3	MHC-DB	High	TVTEFKQL	8		1	2	Q8BY87	UBP47_MOUSE	Ubiquitin carboxyl-terminal hydrolase 47 (EC 3.4.19.12) (Deubiquitinating enzyme 47) (Ubiquitin thioesterase 47) (Ubiquitin-specific-processing protease 47)	Usp47	1376	965.53	24.34	High	0	9.98e-16	43187.7	40	368	0.9	H-2 Kb
Y3	MHC-DB	High	KVLIFSQM	8		1	2	Q8BYH8	CHD9_MOUSE	Chromodomain-helicase-DNA-binding protein 9 (CHD-9) (EC 3.6.4.12) (ATP-dependent helicase CHD9) (PPAR-alpha-interacting complex protein 320 kDa) (Peroxisomal proliferator-activated receptor A-interacting complex 320 kDa protein)	Chd9 Kiaa0308 Pric320	2885	965.549	33.29	High	0	9.98e-16	24655.1	9.5	42.8	0.125	H-2 Kb
B22	MHC-DB	High	SSVENYYVFL	10		1	2	Q8BYY4	TT39B_MOUSE	Tetratricopeptide repeat protein 39B (TPR repeat protein 39B)	Ttc39b	617	1220.58	28.6	High	0	7.984e-06	13.7	0.01	58.6	0.175	H-2 Db
Y3	MHC-DB	High	AHYTYNNL	8		1	1	Q8BZ00	SL9A9_MOUSE	Sodium/hydrogen exchanger 9 (Na(+)/H(+) exchanger 9) (NHE-9) (Solute carrier family 9 member 9)	Slc9a9 Nhe9	644	995.458	12.61	High	0.003	0.004425	31040.8	15	5.4	0.015	H-2 Kb
Y3	MHC-DB	Medium	SATAHQQQL	9		1	1	Q8BZ21	KAT6A_MOUSE	Histone acetyltransferase KAT6A (EC 2.3.1.48) (MOZ, YBF2/SAS3, SAS2 and TIP60 protein 3) (MYST-3) (Monocytic leukemia zinc finger homolog) (Monocytic leukemia zinc finger protein)	Kat6a Moz Myst3	2003	983.491	17.23	Medium	0.033	0.3489	6735.3	1.7	1731.7	3	H-2 Db
B22	MHC-DB	High	SALLLKDVL	9		1	2	Q8BZ36	RINT1_MOUSE	RAD50-interacting protein 1 (RAD50 interactor 1) (RINT-1)	Rint1	792	971.614	36.29	High	0	8.73e-08	113.9	0.07	2407.5	4	H-2 Db
B22	MHC-DB	High	VTVENVQEL	9		1	3	Q8BZM0	KLH12_MOUSE	Kelch-like protein 12 (CUL3-interacting protein 1)	Klhl12 C3ip1	568	1030.54	40.41	High	0	2.588e-05	200	0.125	1208.5	2.5	H-2 Db
B22	MHC-DB	High	AMLTNLESL	9		1	2	Q8BZQ7	ANC2_MOUSE	Anaphase-promoting complex subunit 2 (APC2) (Cyclosome subunit 2)	Anapc2	837	991.513	56.35	High	0	9.67e-08	9.6	0.01	740.1	1.4	H-2 Db
B22	MHC-DB	High	AMLTNLESL	9	1xOxidation [M2]	1	1	Q8BZQ7	ANC2_MOUSE	Anaphase-promoting complex subunit 2 (APC2) (Cyclosome subunit 2)	Anapc2	837	1007.51	39.96	High	0	2.334e-06	9.6	0.01	740.1	1.4	H-2 Db
B22	MHC-DB	High	SVIRLIFEI	9		1	3	Q8BZS9	DHX32_MOUSE	Putative pre-mRNA-splicing factor ATP-dependent RNA helicase DHX32 (EC 3.6.4.13) (DEAH box protein 32) (MuDDX32)	Dhx32 Ddx32	744	1089.67	35.97	High	0	9.912e-05	1548.8	0.5	1617.7	3	H-2 Db
B22	MHC-DB	High	VGIENFELL	9		1	1	Q8C050	KS6A5_MOUSE	Ribosomal protein S6 kinase alpha-5 (S6K-alpha-5) (EC 2.7.11.1) (90 kDa ribosomal protein S6 kinase 5) (Nuclear mitogen- and stress-activated protein kinase 1) (RSK-like protein kinase) (RLSK)	Rps6ka5 Msk1	863	1033.56	14.47	High	0.003	0.02705	28.2	0.02	68.3	0.2	H-2 Db
B22	MHC-DB	High	TAPGNSPERL	10		1	1	Q8C052	MAP1S_MOUSE	Microtubule-associated protein 1S (MAP-1S) (BPY2-interacting protein 1) (Microtubule-associated protein 8) [Cleaved into: MAP1S heavy chain; MAP1S light chain]	Map1s Bpy2ip1 Map8 Mtap1s	973	1041.53	10.29	High	0.001	0.00793	3869.1	1	12521.1	16	H-2 Db
Y3	MHC-DB	High	HIYQFEYM	8		1	2	Q8C079	STRP1_MOUSE	Striatin-interacting protein 1 (Protein FAM40A)	Strip1 Fam40a Kiaa1761	837	1130.5	15.01	High	0.003	0.000932	2954.2	0.8	33.8	0.1	H-2 Kb
B22	MHC-DB	High	SSLTKKEHM	9		1	2	Q8C092	TAF5_MOUSE	Transcription initiation factor TFIID subunit 5 (Transcription initiation factor TFIID 100 kDa subunit) (TAF(II)100) (TAFII-100) (TAFII100)	Taf5	801	1060.55	14.76	High	0	0.003203	1981.2	0.6	1404	2.5	H-2 Db
Y3	MHC-DB	High	QAFDFEFTHV	10		1	2	Q8C0E2	VP26B_MOUSE	Vacuolar protein sorting-associated protein 26B (Vesicle protein sorting 26B)	Vps26b	336	1240.56	53.98	High	0	9.98e-16	18538.1	6	101.1	0.3	H-2 Kb
B22	MHC-DB	High	RAITILEMI	9	1xOxidation [M8]	1	3	Q8C0I4	EPC2_MOUSE	Enhancer of polycomb homolog 2 (EPC-like)	Epc2	808	1075.62	20.96	High	0.001	0.01083	2051.7	0.6	5955.6	8	H-2 Db
Y3	MHC-DB	High	SNVNYYNRL	9		1	2	Q8C0I4	EPC2_MOUSE	Enhancer of polycomb homolog 2 (EPC-like)	Epc2	808	1142.56	43.4	High	0	8.497e-05	28947.2	13	5.2	0.015	H-2 Kb
B22	MHC-DB	High	HDMPNRHEI	9	1xOxidation [M3]	1	1	Q8C0J2	A16L1_MOUSE	Autophagy-related protein 16-1 (APG16-like 1)	Atg16l1 Apg16l	607	1164.52	10.33	High	0.003	0.02702	7705.2	2	32605.4	55	H-2 Db
B22	MHC-DB	Medium	SHICFIEEI	9		1	1	Q8C0L8	COG5_MOUSE	Conserved oligomeric Golgi complex subunit 5 (COG complex subunit 5) (Component of oligomeric Golgi complex 5)	Cog5	829	1090.52	11.78	Medium	0.018	0.1358	3781.8	1	1574.9	3	H-2 Db
B22	MHC-DB	High	FQFINPTTI	9		1	3	Q8C0M0	WDR59_MOUSE	WD repeat-containing protein 59 (CUL4- and DDB1-associated WDR protein 12)	Wdr59 Cdw12 Kiaa1923	992	1080.57	32.92	High	0	0.0001065	6.9	0.01	2843.3	4.5	H-2 Db
B22	MHC-DB	High	FLLPLRVTL	9		1	2	Q8C0N2	GPAT3_MOUSE	Glycerol-3-phosphate acyltransferase 3 (GPAT-3) (EC 2.3.1.15) (1-acyl-sn-glycerol-3-phosphate O-acyltransferase 9) (1-AGP acyltransferase 9) (1-AGPAT 9) (EC 2.3.1.51) (Acyl-CoA:glycerol-3-phosphate acyltransferase 3) (mGPAT3) (Lysophosphatidic acid acyltransferase theta) (LPAAT-theta)	Gpat3 Agpat9	438	1071.69	19.09	High	0.001	0.006339	3927.6	1.1	5984.6	8	H-2 Db
B22	MHC-DB	Medium	SAPKSAAQL	9		1	1	Q8C0P0	GWL_MOUSE	Serine/threonine-protein kinase greatwall (GW) (GWL) (EC 2.7.11.1) (Microtubule-associated serine/threonine-protein kinase-like) (MAST-L)	Mastl Gw Gwl	865	872.484	11.82	Medium	0.026	0.1793	903.4	0.4	709	1.4	H-2 Db
Y3	MHC-DB	High	VNFEKLHMI	9		1	1	Q8C0Q9	RPGF5_MOUSE	Rap guanine nucleotide exchange factor 5 (Guanine nucleotide exchange factor for Rap1) (M-Ras-regulated Rap GEF) (MR-GEF)	Rapgef5 Gfr Kiaa0277 Mrgef	814	1130.6	13.75	High	0.005	0.02715	11552.5	3.5	112.8	0.3	H-2 Kb
B22	MHC-DB	High	FSNKNLEEL	9		1	3	Q8C0S1	DI3L1_MOUSE	DIS3-like exonuclease 1 (EC 3.1.13.-)	Dis3l Kiaa1955	1053	1093.55	37.86	High	0	7.597e-06	19.4	0.015	5154.8	7	H-2 Db
B22	MHC-DB	High	VQPFNYVTL	9		1	7	Q8C0T1	FM1AB_MOUSE	Protein fem-1 homolog A-B (FEM1a-B) (FEM1-alpha-B)	Fem1ab	654	1080.57	34.86	High	0	5.002e-05	22.1	0.015	93.8	0.25	H-2 Db
Y3	MHC-DB	High	ISYEFKFPF	9		1	1	Q8C0T5	SI1L1_MOUSE	Signal-induced proliferation-associated 1-like protein 1 (SIPA1-like protein 1)	Sipa1l1 Kiaa0440	1782	1177.59	23.08	High	0	0.0002051	4363.2	1.2	16.8	0.05	H-2 Kb
B22	MHC-DB	High	RASEPNFSLL	10		1	2	Q8C0V7	SMKW_MOUSE	Putative sperm motility kinase W (EC 2.7.11.1)	Stk-ps2 Gm4776	499	1133.6	13.73	High	0.003	0.03758	6688.8	1.7	6070.1	8	H-2 Db
B22	MHC-DB	High	SVIQNNEHV	9		1	1	Q8C0V9	FRMD6_MOUSE	FERM domain-containing protein 6	Frmd6	622	1039.52	15.97	High	0.001	0.006036	151.5	0.09	6961.2	9	H-2 Db
Y3	MHC-DB	High	SYFKGASL	8		1	2	Q8C129	LCAP_MOUSE	Leucyl-cystinyl aminopeptidase (Cystinyl aminopeptidase) (EC 3.4.11.3) (Oxytocinase) (OTase)	Lnpep	1025	872.451	18.54	High	0.003	0.007842	26698.2	11	270.1	0.7	H-2 Kb
Y3	MHC-DB	High	RGPLFSHL	8		1	2	Q8C145	S39A6_MOUSE	Zinc transporter ZIP6 (Endoplasmic reticulum membrane-linked protein) (Ermelin) (Solute carrier family 39 member 6) (Zrt- and Irt-like protein 6) (ZIP-6)	Slc39a6 Zip6	765	926.521	20.6	High	0.003	0.001248	23743	9	14.7	0.05	H-2 Kb
Y3	MHC-DB	High	SIFEHKIVF	9		1	6	Q8C145	S39A6_MOUSE	Zinc transporter ZIP6 (Endoplasmic reticulum membrane-linked protein) (Ermelin) (Solute carrier family 39 member 6) (Zrt- and Irt-like protein 6) (ZIP-6)	Slc39a6 Zip6	765	1119.62	40.99	High	0	5.16e-14	26210.2	11	409.8	0.9	H-2 Kb
Y3	MHC-DB	High	SIISFLSL	8		1	2	Q8C145	S39A6_MOUSE	Zinc transporter ZIP6 (Endoplasmic reticulum membrane-linked protein) (Ermelin) (Solute carrier family 39 member 6) (Zrt- and Irt-like protein 6) (ZIP-6)	Slc39a6 Zip6	765	879.519	27.26	High	0	1.12e-13	17690.4	5.5	9.7	0.03	H-2 Kb
B22	MHC-DB	High	ASFFNISTL	9		1	1	Q8C147	DOCK8_MOUSE	Dedicator of cytokinesis protein 8	Dock8	2100	999.515	22.92	High	0	6.835e-05	42.3	0.03	113.3	0.3	H-2 Db
B22	MHC-DB	High	FMYTTPFTL	9		1	1	Q8C147	DOCK8_MOUSE	Dedicator of cytokinesis protein 8	Dock8	2100	1120.54	27.13	High	0	0.00189	270.6	0.15	273.2	0.7	H-2 Db
Y3	MHC-DB	High	KSPDFYEEV	9		1	2	Q8C147	DOCK8_MOUSE	Dedicator of cytokinesis protein 8	Dock8	2100	1113.51	22.7	High	0	1.386e-05	17080.6	5.5	89.9	0.25	H-2 Kb
B22	MHC-DB	High	FGLHLIDFM	9	1xOxidation [M9]	1	4	Q8C156	CND2_MOUSE	Condensin complex subunit 2 (Barren homolog protein 1) (Chromosome-associated protein H) (mCAP-H) (Non-SMC condensin I complex subunit H) (XCAP-H homolog)	Ncaph Brrn Brrn1 Caph	731	1108.55	28.66	High	0	0.0001853	271.6	0.15	9734.4	13	H-2 Db
B22	MHC-DB	High	FGLHLIDFM	9		1	4	Q8C156	CND2_MOUSE	Condensin complex subunit 2 (Barren homolog protein 1) (Chromosome-associated protein H) (mCAP-H) (Non-SMC condensin I complex subunit H) (XCAP-H homolog)	Ncaph Brrn Brrn1 Caph	731	1092.55	24.78	High	0	6.615e-05	271.6	0.15	9734.4	13	H-2 Db
Y3	MHC-DB	Medium	FGLHLIDFM	9		1	1	Q8C156	CND2_MOUSE	Condensin complex subunit 2 (Barren homolog protein 1) (Chromosome-associated protein H) (mCAP-H) (Non-SMC condensin I complex subunit H) (XCAP-H homolog)	Ncaph Brrn Brrn1 Caph	731	1092.55	14.65	Medium	0.013	0.02739	271.6	0.15	9734.4	13	H-2 Db
B22	MHC-DB	Medium	WNLQGLQAL	9		1	1	Q8C160	MSLNL_MOUSE	Mesothelin-like protein (Pre-pro-megakaryocyte-potentiating-factor-like)	Mslnl Mpfl	685	1042.57	10.14	Medium	0.028	0.1921	7921.4	2	3271.2	5	H-2 Db
Y3	MHC-DB	High	SNLLYVNV	8		1	1	Q8C167	PPCEL_MOUSE	Prolyl endopeptidase-like (EC 3.4.21.-) (Prolylendopeptidase-like)	Prepl Kiaa0436	725	921.504	21.73	High	0.003	0.000932	32632.6	17	8.3	0.025	H-2 Kb
B22	MHC-DB	High	ISWHNIDYI	9		1	3	Q8C170	MYO9A_MOUSE	Unconventional myosin-IXa (Unconventional myosin-9a)	Myo9a Myr7	2542	1160.57	24	High	0	2.387e-05	16	0.01	1129.8	2	H-2 Db
B22	MHC-DB	High	KAVLNPTII	9		1	1	Q8C176	TAF2_MOUSE	Transcription initiation factor TFIID subunit 2 (TBP-associated factor 150 kDa) (Transcription initiation factor TFIID 150 kDa subunit) (TAF(II)150) (TAFII-150) (TAFII150)	Taf2	1104	968.614	14.74	High	0.003	0.03846	9.4	0.01	7171	9.5	H-2 Db
B22	MHC-DB	Medium	YASMSIFSTNL	11		1	1	Q8C176	TAF2_MOUSE	Transcription initiation factor TFIID subunit 2 (TBP-associated factor 150 kDa) (Transcription initiation factor TFIID 150 kDa subunit) (TAF(II)150) (TAFII-150) (TAFII150)	Taf2	1104	1233.58	10.3	Medium	0.035	0.2256	16124	5	221.6	0.6	H-2 Kb
Y3	MHC-DB	High	SAYLFKQGL	9		1	1	Q8C1A9	ABD18_MOUSE	Protein ABHD18 (Alpha/beta hydrolase domain-containing protein 18) (Abhydrolase domain-containing protein 18)	Abhd18	464	1026.56	16.78	High	0.003	0.003654	9782.6	3	4.5	0.01	H-2 Kb
B22	MHC-DB	High	FMMWNNHYI	9		1	2	Q8C1B2	PARPT_MOUSE	TCDD-inducible poly [ADP-ribose] polymerase (EC 2.4.2.30) (ADP-ribosyltransferase diphtheria toxin-like 14) (ARTD14)	Tiparp	657	1255.54	36.26	High	0	1.4e-06	10.9	0.01	2528.4	4	H-2 Db
B22	MHC-DB	High	FMMWNNHYI	9	1xOxidation [M]	1	2	Q8C1B2	PARPT_MOUSE	TCDD-inducible poly [ADP-ribose] polymerase (EC 2.4.2.30) (ADP-ribosyltransferase diphtheria toxin-like 14) (ARTD14)	Tiparp	657	1271.53	18	High	0	2.445e-05	10.9	0.01	2528.4	4	H-2 Db
Y3	MHC-DB	High	KIQSFINRM	9	1xOxidation [M9]	1	3	Q8C1Y8	CCZ1_MOUSE	Vacuolar fusion protein CCZ1 homolog	Ccz1	480	1152.62	42.81	High	0	6.6e-15	38200.9	26	202.8	0.5	H-2 Kb
Y3	MHC-DB	High	KIQSFINRM	9		1	7	Q8C1Y8	CCZ1_MOUSE	Vacuolar fusion protein CCZ1 homolog	Ccz1	480	1136.62	41.43	High	0.003	0.003436	38200.9	26	202.8	0.5	H-2 Kb
B22	MHC-DB	High	FSPENTELL	9		1	1	Q8C1Z7	BBS4_MOUSE	Bardet-Biedl syndrome 4 protein homolog	Bbs4	520	1049.52	25.49	High	0	8.296e-05	26.4	0.02	4228.8	6	H-2 Db
Y3	MHC-DB	Medium	LAVLHVQL	8		1	1	Q8C2K5	RASL3_MOUSE	RAS protein activator like-3	Rasal3	1041	892.562	10.27	Medium	0.021	0.09212	26552.1	11	487.4	1.1	H-2 Kb
Y3	MHC-DB	Medium	WLLNGQPI	8		2	2	Q8C310	ROBO4_MOUSE	Roundabout homolog 4	Robo4	1012	940.525	17.75	Medium	0.031	0.3489	3585	1	17563.7	23	H-2 Db
B22	MHC-DB	High	SQFPNAEKM	9		1	7	Q8C3J5	DOCK2_MOUSE	Dedicator of cytokinesis protein 2 (Protein Hch)	Dock2	1828	1051.49	34.02	High	0	0.002157	158.7	0.09	4713	6.5	H-2 Db
B22	MHC-DB	High	KSVENFVSL	9		1	3	Q8C3J5	DOCK2_MOUSE	Dedicator of cytokinesis protein 2 (Protein Hch)	Dock2	1828	1022.55	34.27	High	0	0.0001655	32.5	0.025	109.5	0.3	H-2 Db
Y3	MHC-DB	High	KSVENFVSL	9		1	1	Q8C3J5	DOCK2_MOUSE	Dedicator of cytokinesis protein 2 (Protein Hch)	Dock2	1828	1022.55	29.66	High	0	1.86e-08	32.5	0.025	109.5	0.3	H-2 Db
Y3	MHC-DB	High	VNQFFKTM	8		1	2	Q8C3J5	DOCK2_MOUSE	Dedicator of cytokinesis protein 2 (Protein Hch)	Dock2	1828	1014.51	49.26	High	0	9.98e-16	21247.6	7.5	117.1	0.4	H-2 Kb
Y3	MHC-DB	High	VNQFFKTML	9		1	2	Q8C3J5	DOCK2_MOUSE	Dedicator of cytokinesis protein 2 (Protein Hch)	Dock2	1828	1127.59	21.01	High	0	0.0002837	29869.5	14	39.5	0.125	H-2 Kb
Y3	MHC-DB	High	ATLAYKKL	8		1	1	Q8C3J5	DOCK2_MOUSE	Dedicator of cytokinesis protein 2 (Protein Hch)	Dock2	1828	907.561	20.65	High	0.007	0.02739	39397.7	28	84	0.25	H-2 Kb
Y3	MHC-DB	High	SALEFLTHL	9		1	3	Q8C3R1	BRAT1_MOUSE	BRCA1-associated ATM activator 1 (BRCA1-associated protein required for ATM activation protein 1)	Brat1 Baat1	822	1030.56	55.33	High	0	2.77e-07	263.5	0.125	8.6	0.025	H-2 Kb
Y3	MHC-DB	High	GNYNFFNL	8		1	1	Q8C3X8	LMF2_MOUSE	Lipase maturation factor 2 (Transmembrane protein 112B) (Transmembrane protein 153)	Lmf2 Tmem112b Tmem153	702	988.452	22.58	High	0	4.06e-15	10862.5	3	5.5	0.015	H-2 Kb
Y3	MHC-DB	High	GNYNFFNLL	9		1	2	Q8C3X8	LMF2_MOUSE	Lipase maturation factor 2 (Transmembrane protein 112B) (Transmembrane protein 153)	Lmf2 Tmem112b Tmem153	702	1101.54	15.93	High	0.003	0.000932	12224.2	3.5	6.7	0.02	H-2 Kb
B22	MHC-DB	High	QGITNLKLVTL	11		1	1	Q8C3Y4	KNTC1_MOUSE	Kinetochore-associated protein 1	Kntc1 Kiaa0166	2207	1199.74	25.47	High	0	8.399e-05	1110.8	0.4	5309.4	7	H-2 Db
B22	MHC-DB	High	YALEHMITL	9		1	2	Q8C3Y4	KNTC1_MOUSE	Kinetochore-associated protein 1	Kntc1 Kiaa0166	2207	1090.56	19.32	High	0	0.00316	23.7	0.015	249.1	0.6	H-2 Db
B22	MHC-DB	High	YAPANGDFT	9		1	4	Q8C407	YIPF4_MOUSE	Protein YIPF4 (YIP1 family member 4)	Yipf4	246	955.416	34.14	High	0	0.001358	31.6	0.025	35230.3	65	H-2 Db
B22	MHC-DB	High	LSPINIQLL	9		1	2	Q8C456	FRITZ_MOUSE	WD repeat-containing and planar cell polarity effector protein fritz homolog (mFrtz) (Homolog-13) (WD repeat-containing and planar cell polarity effector protein)	Wdpcp	722	1010.62	30.71	High	0	2.973e-06	167.6	0.1	971.9	1.8	H-2 Db
B22	MHC-DB	High	RALINKHTF	9		1	3	Q8C4A5	ASXL3_MOUSE	Putative Polycomb group protein ASXL3 (Additional sex combs-like protein 3)	Asxl3	2259	1099.64	12.56	High	0.002	0.02005	39.3	0.03	6135	8	H-2 Db
B22	MHC-DB	High	HIYEFPQL	8		1	2	Q8C4B4	U119B_MOUSE	Protein unc-119 homolog B	Unc119b	251	1046.53	18.77	High	0	0.004128	28284.9	12	7.9	0.02	H-2 Kb
Y3	MHC-DB	High	HIYEFPQL	8		1	4	Q8C4B4	U119B_MOUSE	Protein unc-119 homolog B	Unc119b	251	1046.53	27.59	High	0	0.000932	28284.9	12	7.9	0.02	H-2 Kb
Y3	MHC-DB	High	QAPRYSSL	8		1	3	Q8C4S8	DEN2A_MOUSE	DENN domain-containing protein 2A	Dennd2a	1000	921.479	24.43	High	0	1.07e-13	27902.6	12	22.6	0.07	H-2 Kb
B22	MHC-DB	High	FSLKTVLMI	9	1xOxidation [M8]	1	1	Q8C4X2	KC1G3_MOUSE	Casein kinase I isoform gamma-3 (CKI-gamma 3) (EC 2.7.11.1)	Csnk1g3	424	1067.62	11.44	High	0.007	0.06517	5411.2	1.4	2085.8	3.5	H-2 Db
B22	MHC-DB	High	KQALNADYI	9		1	1	Q8C522	ENDD1_MOUSE	Endonuclease domain-containing 1 protein (EC 3.1.30.-)	Endod1 Kiaa0830	501	1035.55	15.84	High	0	0.003408	10.8	0.01	17043.9	22	H-2 Db
Y3	MHC-DB	High	AQYSFDKL	8		2	2	Q8C547	HTR5B_MOUSE	HEAT repeat-containing protein 5B	Heatr5b Kiaa1414	2070	971.483	21.61	High	0.003	0.003503	12399.9	3.5	36.3	0.125	H-2 Kb
Y3	MHC-DB	High	VIYPMAVV	8		1	1	Q8C570	RAE1L_MOUSE	mRNA export factor (Rae1 protein homolog) (mRNA-associated protein mrnp 41)	Rae1 Mrnp41	368	891.501	16.22	High	0.007	0.02739	32623.8	17	29.1	0.09	H-2 Kb
B22	MHC-DB	High	SAVPNQISI	9		1	1	Q8C5D8	PIAS2_MOUSE	E3 SUMO-protein ligase PIAS2 (EC 6.3.2.-) (Androgen receptor-interacting protein 3) (ARIP3) (DAB2-interacting protein) (DIP) (Msx-interacting zinc finger protein) (Protein inhibitor of activated STAT x) (Protein inhibitor of activated STAT2)	Pias2 Miz1 Piasx	621	928.51	20.71	High	0.001	0.008205	20.1	0.015	3575.1	5	H-2 Db
B22	MHC-DB	High	IAEENVTEI	9		1	1	Q8C633	CABS1_MOUSE	Calcium-binding and spermatid-specific protein 1	Cabs1	391	1017.51	21.23	High	0.007	0.0628	92.5	0.06	9243.5	12	H-2 Db
Y3	MHC-DB	Medium	RSPPFTARI	9		1	1	Q8C669	PELI1_MOUSE	E3 ubiquitin-protein ligase pellino homolog 1 (Pellino-1) (EC 6.3.2.-)	Peli1	418	1044.59	14.28	Medium	0.024	0.1211	19490.6	6.5	59.5	0.175	H-2 Kb
Y3	MHC-DB	Medium	ATMKYGAQV	9	1xOxidation [M3]	1	2	Q8C726	BTBD9_MOUSE	BTB/POZ domain-containing protein 9	Btbd9	612	984.482	17.26	Medium	0.024	0.1027	31399.2	15	198.6	0.5	H-2 Kb
B22	MHC-DB	High	ASLHNQITA	9		1	2	Q8C754	VPS52_MOUSE	Vacuolar protein sorting-associated protein 52 homolog	Vps52	723	954.5	14.92	High	0.001	0.006634	102	0.07	11086	14	H-2 Db
Y3	MHC-DB	High	KIISLSHL	8		1	1	Q8C779	CX057_MOUSE	Uncharacterized protein CXorf57 homolog		850	910.572	16.16	High	0.005	0.02434	26023.9	11	136.5	0.4	H-2 Kb
Y3	MHC-DB	High	TVYKASNL	8		1	1	Q8C7D2	CRBN_MOUSE	Protein cereblon (Protein PiL)	Crbn	445	895.488	10.24	High	0.005	0.02701	37396.1	24	17.7	0.05	H-2 Kb
B22	MHC-DB	High	SQIKNEINI	9		1	1	Q8C7X2	EMC1_MOUSE	ER membrane protein complex subunit 1	Emc1 Kiaa0090	997	1058.58	21.33	High	0.003	0.0262	39.5	0.03	3419.9	5	H-2 Db
B22	MHC-DB	High	SSLINHKSV	9		1	2	Q8C827	ZFP62_MOUSE	Zinc finger protein 62 (Zfp-62) (ZT3)	Zfp62	914	984.547	24.4	High	0	0.001389	223.2	0.125	876.5	1.6	H-2 Db
B22	MHC-DB	High	SALDNGPQI	9		1	1	Q8C863	ITCH_MOUSE	E3 ubiquitin-protein ligase Itchy (EC 6.3.2.-)	Itch	864	914.458	32.32	High	0	1.559e-05	97.7	0.06	4566.4	6.5	H-2 Db
B22	MHC-DB	High	VSNLNRQFL	9		1	2	Q8C878	UBA3_MOUSE	NEDD8-activating enzyme E1 catalytic subunit (EC 6.3.2.-) (NEDD8-activating enzyme E1C) (Ubiquitin-activating enzyme E1C) (Ubiquitin-like modifier-activating enzyme 3) (Ubiquitin-activating enzyme 3)	Uba3 Ube1c	462	1090.6	39.53	High	0	6.57e-07	33.4	0.025	906.4	1.7	H-2 Db
Y3	MHC-DB	High	RTPVFSFL	8		1	1	Q8C8M1	FA60A_MOUSE	Protein FAM60A (Tera protein)	Fam60a Tera	221	966.541	21.42	High	0.006	0.02739	16465.8	5	25	0.08	H-2 Kb
B22	MHC-DB	High	VTIHNQDLL	9		1	1	Q8C8V1	ZXDC_MOUSE	Zinc finger protein ZXDC	Zxdc	858	1052.57	22.27	High	0	0.001039	56.4	0.04	1063.7	1.9	H-2 Db
B22	MHC-DB	High	FAIRNILDYV	10		1	3	Q8CAS9	PARP9_MOUSE	Poly [ADP-ribose] polymerase 9 (PARP-9) (EC 2.4.2.30) (ADP-ribosyltransferase diphtheria toxin-like 9) (ARTD9) (B aggressive lymphoma protein homolog)	Parp9 Bal	866	1223.68	25.12	High	0	0.0001559	4.6	0.01	11587.5	15	H-2 Db
B22	MHC-DB	High	RSAANPDMF	9	1xOxidation [M8]	1	1	Q8CBW4	DC121_MOUSE	DDB1- and CUL4-associated factor 12-like protein 1 (WD repeat-containing protein 40B)	Dcaf12l1 Wdr40b	501	1024.45	15.78	High	0.002	0.01746	1641.6	0.5	17042.4	22	H-2 Db
B22	MHC-DB	High	GQLENAEQL	9		1	4	Q8CC21	TTC19_MOUSE	Tetratricopeptide repeat protein 19, mitochondrial (TPR repeat protein 19)	Ttc19	365	1001.49	55.33	High	0	0.0001368	75.8	0.05	18723.1	25	H-2 Db
Y3	MHC-DB	High	GQLENAEQL	9		1	2	Q8CC21	TTC19_MOUSE	Tetratricopeptide repeat protein 19, mitochondrial (TPR repeat protein 19)	Ttc19	365	1001.49	44.16	High	0.002	0.000932	75.8	0.05	18723.1	25	H-2 Db
B22	MHC-DB	High	AAMLLQQVM	9	1xOxidation [M9]	1	3	Q8CCJ3	UFL1_MOUSE	E3 UFM1-protein ligase 1 (EC 6.3.2.-)	Ufl1 Kiaa0776	793	1020.52	40.24	High	0	1.298e-05	254.5	0.125	2890.6	4.5	H-2 Db
B22	MHC-DB	High	AAMLLQQVM	9		1	3	Q8CCJ3	UFL1_MOUSE	E3 UFM1-protein ligase 1 (EC 6.3.2.-)	Ufl1 Kiaa0776	793	1004.53	31.97	High	0	0.0004248	254.5	0.125	2890.6	4.5	H-2 Db
B22	MHC-DB	High	SQKKNEAVI	9		1	1	Q8CCJ9	P20L1_MOUSE	PHD finger protein 20-like protein 1	Phf20l1	1013	1016.57	13.92	High	0.002	0.02004	740.6	0.3	18058.2	24	H-2 Db
Y3	MHC-DB	High	RFMQFSSL	8	1xOxidation [M3]	1	3	Q8CD10	MICU2_MOUSE	Calcium uptake protein 2, mitochondrial (EF-hand domain-containing family member A1)	Micu2 Efha1	432	1031.5	30.42	High	0.003	0.000932	20766.4	7	37.2	0.125	H-2 Kb
Y3	MHC-DB	High	VVYIYHSL	8		1	2	Q8CD15	MINA_MOUSE	Bifunctional lysine-specific demethylase and histidyl-hydroxylase MINA (EC 1.14.11.-) (Histone lysine demethylase MINA) (MYC-induced nuclear antigen)	Mina Mina53	465	993.54	34.95	High	0	8.98e-13	13891.5	4	2.6	0.01	H-2 Kb
B22	MHC-DB	High	QTILNSTMM	9		1	3	Q8CD92	TTC27_MOUSE	Tetratricopeptide repeat protein 27 (TPR repeat protein 27)	Ttc27	847	1038.5	34.72	High	0	0.000687	203.5	0.125	1161.1	2	H-2 Db
Y3	MHC-DB	High	SATVFRTV	8		1	2	Q8CDD8	KCD20_MOUSE	BTB/POZ domain-containing protein KCTD20 (Potassium channel tetramerization domain containing 20)	Kctd20	419	880.489	25.08	High	0.003	0.003654	23554.9	8.5	178	0.5	H-2 Kb
B22	MHC-DB	High	FSVTNPHTM	9		1	3	Q8CDD9	LRIF1_MOUSE	Ligand-dependent nuclear receptor-interacting factor 1	Lrif1	755	1033.48	43.76	High	0	1.423e-05	4	0.01	5930.6	8	H-2 Db
B22	MHC-DB	High	FSVTNPHTM	9	1xOxidation [M9]	1	2	Q8CDD9	LRIF1_MOUSE	Ligand-dependent nuclear receptor-interacting factor 1	Lrif1	755	1049.47	31.25	High	0	4.188e-06	4	0.01	5930.6	8	H-2 Db
Y3	MHC-DB	High	KNYSFPLNNL	10		1	2	Q8CDG3	VCIP1_MOUSE	Deubiquitinating protein VCIP135 (EC 3.4.19.12) (Valosin-containing protein p97/p47 complex-interacting protein 1) (Valosin-containing protein p97/p47 complex-interacting protein p135)	Vcpip1 Vcip135	1220	1209.63	39.03	High	0	9.98e-16	20247.3	7	25	0.08	H-2 Kb
B22	MHC-DB	High	SQHVNLDQL	9		1	3	Q8CDJ3	BAKOR_MOUSE	Beclin 1-associated autophagy-related key regulator (Barkor) (Autophagy-related protein 14-like protein) (Atg14L)	Atg14 Atg14L D14Ertd436e Kiaa0831	492	1053.53	30.68	High	0	0.0009365	11.9	0.01	2870	4.5	H-2 Db
Y3	MHC-DB	Medium	RMESNLVSL	9	1xOxidation [M2]	1	2	Q8CDL9	CCD87_MOUSE	Coiled-coil domain-containing protein 87	Ccdc87	855	1064.54	13.95	Medium	0.033	0.3489	751.7	0.3	2487.3	4	H-2 Db
B22	MHC-DB	High	FQNVNSVTL	9		1	4	Q8CDN6	TXNL1_MOUSE	Thioredoxin-like protein 1 (32 kDa thioredoxin-related protein)	Txnl1 Trp32 Txnl	289	1021.53	40.56	High	0	0.0007103	9.5	0.01	3990.7	5.5	H-2 Db
Y3	MHC-DB	High	IWVQLMTSL	9		1	2	Q8CE13	CCD17_MOUSE	Coiled-coil domain-containing protein 17	Ccdc17	565	1090.6	12.24	High	0	0.000932	6913.7	1.8	290.3	0.7	H-2 Kb
B22	MHC-DB	High	HMYTLSQLAL	10	1xOxidation [M2]	1	1	Q8CE33	KLH11_MOUSE	Kelch-like protein 11	Klhl11	709	1192.6	11.51	High	0.003	0.03756	4506.4	1.2	2083.9	3.5	H-2 Db
B22	MHC-DB	Medium	TALQNSFGLP	10		1	1	Q8CE72	CE042_MOUSE	Uncharacterized protein C5orf42 homolog		3214	1047.55	20.33	Medium	0.038	0.2331	5354.2	1.4	7669.3	10	H-2 Db
Y3	MHC-DB	High	KVLEFERV	8		1	1	Q8CEC6	PPWD1_MOUSE	Peptidylprolyl isomerase domain and WD repeat-containing protein 1 (EC 5.2.1.8)	Ppwd1	646	1019.59	36.21	High	0	9.98e-16	39694.6	29	211.9	0.6	H-2 Kb
Y3	MHC-DB	High	ASFIFRQL	8		1	1	Q8CEE6	PASK_MOUSE	PAS domain-containing serine/threonine-protein kinase (PAS-kinase) (PASKIN) (EC 2.7.11.1)	Pask Kiaa0135	1383	981.552	35.05	High	0	9.98e-16	16177.4	5	2.9	0.01	H-2 Kb
B22	MHC-DB	High	IQPINHTTL	9		1	4	Q8CEF1	FEM1C_MOUSE	Protein fem-1 homolog C (FEM1c) (FEM1-gamma)	Fem1c Kiaa1785	617	1036.58	29.31	High	0	0.000901	14.5	0.01	508	1.1	H-2 Db
B22	MHC-DB	High	GASVNNTTL	9		1	1	Q8CEF1	FEM1C_MOUSE	Protein fem-1 homolog C (FEM1c) (FEM1-gamma)	Fem1c Kiaa1785	617	876.442	22.73	High	0.001	0.007198	164.9	0.1	17836.1	24	H-2 Db
Y3	MHC-DB	High	TIYRFLKL	8		1	7	Q8CEF1	FEM1C_MOUSE	Protein fem-1 homolog C (FEM1c) (FEM1-gamma)	Fem1c Kiaa1785	617	1053.65	21.06	High	0	1.98e-10	25333.8	10	3.7	0.01	H-2 Kb
B22	MHC-DB	High	TTLTNSTPL	9		1	1	Q8CEF1	FEM1C_MOUSE	Protein fem-1 homolog C (FEM1c) (FEM1-gamma)	Fem1c Kiaa1785	617	947.504	13.95	High	0.004	0.04278	13.6	0.01	355.9	0.8	H-2 Db
B22	MHC-DB	Medium	LKEANPDPL	9		1	3	Q8CEF9	T132C_MOUSE	Transmembrane protein 132C	Tmem132c	1099	996.536	24.85	Medium	0.01	0.07989	6828.2	1.8	28483.9	44	H-2 Db
Y3	MHC-DB	High	TILSFTNL	8		1	3	Q8CFE6	S38A2_MOUSE	Sodium-coupled neutral amino acid transporter 2 (Amino acid transporter A2) (Solute carrier family 38 member 2) (System A amino acid transporter 2) (System A transporter 1) (System N amino acid transporter 2)	Slc38a2 Ata2 Kiaa1382 Sat2 Snat2	504	908.509	32.51	High	0	9.99e-16	24907.6	9.5	4.2	0.01	H-2 Kb
B22	MHC-DB	High	FSYKIDFAEM	10		1	2	Q8CFF0	PAR11_MOUSE	Poly [ADP-ribose] polymerase 11 (PARP-11) (EC 2.4.2.30) (ADP-ribosyltransferase diphtheria toxin-like 11) (ARTD11)	Parp11	331	1250.58	36.15	High	0	4.84e-07	800.4	0.3	443.1	1	H-2 Db
B22	MHC-DB	High	FSYKIDFAEM	10	1xOxidation [M10]	1	2	Q8CFF0	PAR11_MOUSE	Poly [ADP-ribose] polymerase 11 (PARP-11) (EC 2.4.2.30) (ADP-ribosyltransferase diphtheria toxin-like 11) (ARTD11)	Parp11	331	1266.57	31.23	High	0	8.675e-05	800.4	0.3	443.1	1	H-2 Db
B22	MHC-DB	High	WSMENLEEI	9		1	1	Q8CFI7	RPB2_MOUSE	DNA-directed RNA polymerase II subunit RPB2 (EC 2.7.7.6) (DNA-directed RNA polymerase II 140 kDa polypeptide) (DNA-directed RNA polymerase II subunit B) (RNA polymerase II subunit 2) (RNA polymerase II subunit B2)	Polr2b	1174	1150.51	13.23	High	0.003	0.02751	10.1	0.01	4455.2	6	H-2 Db
Y3	MHC-DB	High	IGPTYYQRL	9		1	4	Q8CFI7	RPB2_MOUSE	DNA-directed RNA polymerase II subunit RPB2 (EC 2.7.7.6) (DNA-directed RNA polymerase II 140 kDa polypeptide) (DNA-directed RNA polymerase II subunit B) (RNA polymerase II subunit 2) (RNA polymerase II subunit B2)	Polr2b	1174	1110.59	66.73	High	0	9.98e-16	22653.6	8	3.9	0.01	H-2 Kb
Y3	MHC-DB	High	ISVRFHNL	8		1	3	Q8CFL8	ZSWM3_MOUSE	Zinc finger SWIM domain-containing protein 3	Zswim3	695	985.558	27.78	High	0	0.000932	15546.3	5	2.9	0.01	H-2 Kb
Y3	MHC-DB	High	INAEFVTQL	9		1	2	Q8CFQ3	AQR_MOUSE	Intron-binding protein aquarius	Aqr Kiaa0560	1481	1034.55	28.1	High	0	9.98e-16	26518	11	40.7	0.125	H-2 Kb
B22	MHC-DB	Medium	PGYLMNFASI	10	1xOxidation [M5]	1	1	Q8CFW1	ANO2_MOUSE	Anoctamin-2 (Transmembrane protein 16B)	Ano2 Tmem16b	1002	1128.54	22.85	Medium	0.011	0.09249	6313.3	1.6	3622.6	5.5	H-2 Db
B22	MHC-DB	High	LILQNTTVI	9		1	1	Q8CG46	SMC5_MOUSE	Structural maintenance of chromosomes protein 5 (SMC protein 5) (SMC-5) (mSMC5) (Protein expressed in male leptotene and zygotene spermatocytes 453) (MLZ-453)	Smc5 Kiaa0594 Smc5l1	1101	1014.62	13.47	High	0	0.005579	74.3	0.05	7805.3	10	H-2 Db
Y3	MHC-DB	High	SSVLYSRV	8		1	1	Q8CGC7	SYEP_MOUSE	Bifunctional glutamate/proline--tRNA ligase (Bifunctional aminoacyl-tRNA synthetase) [Includes: Glutamate--tRNA ligase (EC 6.1.1.17) (Glutamyl-tRNA synthetase) (GluRS); Proline--tRNA ligase (EC 6.1.1.15) (Prolyl-tRNA synthetase) (ProRS)]	Eprs Qprs	1512	910.499	35.41	High	0	5.28e-10	29209.6	13	7	0.02	H-2 Kb
Y3	MHC-DB	High	LFLRQLIL	8		1	1	Q8CGF6	WDR47_MOUSE	WD repeat-containing protein 47 (Neuronal enriched MAP interacting protein) (Nemitin)	Wdr47 Kiaa0893	920	1015.67	14.35	High	0.003	0.003654	39105.5	28	4718.2	6.5	H-2 Kb
B22	MHC-DB	High	AAGTNKENL	9		1	3	Q8CGN4	BCOR_MOUSE	BCL-6 corepressor (BCoR)	Bcor Kiaa1575	1759	917.469	46.89	High	0	1.497e-06	229.5	0.125	8545.4	11	H-2 Db
Y3	MHC-DB	High	AAGTNKENL	9		1	1	Q8CGN4	BCOR_MOUSE	BCL-6 corepressor (BCoR)	Bcor Kiaa1575	1759	917.469	36.63	High	0	1.44e-10	229.5	0.125	8545.4	11	H-2 Db
B22	MHC-DB	High	QGPRNWLLL	9		1	3	Q8CGN4	BCOR_MOUSE	BCL-6 corepressor (BCoR)	Bcor Kiaa1575	1759	1096.63	25.79	High	0.001	0.01153	411.2	0.2	945.9	1.7	H-2 Db
B22	MHC-DB	High	LAIRNDEEL	9		1	2	Q8CGP5	H2A1F_MOUSE	Histone H2A type 1-F	Hist1h2af	130	1072.56	44.86	High	0	7.588e-06	12.2	0.01	5318.5	7	H-2 Db
Y3	MHC-DB	High	LAIRNDEEL	9		1	1	Q8CGP5	H2A1F_MOUSE	Histone H2A type 1-F	Hist1h2af	130	1072.56	12.7	High	0.003	0.003408	12.2	0.01	5318.5	7	H-2 Db
B22	MHC-DB	Medium	SMLQNDRTGL	10	1xOxidation [M2]	1	1	Q8CGS6	DPOLQ_MOUSE	DNA polymerase theta (EC 2.7.7.7) (Chromosome aberrations occurring spontaneously protein 1) (DNA polymerase eta)	Polq Chaos1	2544	1150.55	12.35	Medium	0.017	0.129	273.6	0.15	5083.7	7	H-2 Db
Y3	MHC-DB	High	SVLIFNSM	8		1	1	Q8CGS6	DPOLQ_MOUSE	DNA polymerase theta (EC 2.7.7.7) (Chromosome aberrations occurring spontaneously protein 1) (DNA polymerase eta)	Polq Chaos1	2544	910.47	20.58	High	0.005	0.02296	17089.5	5.5	30.2	0.09	H-2 Kb
Y3	MHC-DB	High	KSYSFIARM	9	1xOxidation [M9]	1	4	Q8CGZ0	CHERP_MOUSE	Calcium homeostasis endoplasmic reticulum protein (SR-related CTD-associated factor 6)	Cherp Scaf6	936	1118.57	38.73	High	0	9.98e-16	6412.5	1.7	4.4	0.01	H-2 Kb
Y3	MHC-DB	High	KSYSFIARM	9		1	5	Q8CGZ0	CHERP_MOUSE	Calcium homeostasis endoplasmic reticulum protein (SR-related CTD-associated factor 6)	Cherp Scaf6	936	1102.57	29.33	High	0	9.98e-16	6412.5	1.7	4.4	0.01	H-2 Kb
Y3	MHC-DB	High	SNIQYRSL	8		1	1	Q8CH77	NAV1_MOUSE	Neuron navigator 1 (Pore membrane and/or filament-interacting-like protein 3)	Nav1 Kiaa1151 Pomfil3	1875	980.516	28.11	High	0	2.873e-06	26513.4	11	9.1	0.025	H-2 Kb
Y3	MHC-DB	High	NIFVFKELL	9		2	4	Q8CHG7	RPGF2_MOUSE	Rap guanine nucleotide exchange factor 2 (Cyclic nucleotide ras GEF) (CNrasGEF) (Neural RAP guanine nucleotide exchange protein) (nRap GEP) (PDZ domain-containing guanine nucleotide exchange factor 1) (PDZ-GEF1) (RA-GEF-1) (Ras/Rap1-associating GEF-1)	Rapgef2 Kiaa0313 Pdzgef1	1496	1122.66	23.61	High	0.003	0.001823	18634.4	6	190.3	0.5	H-2 Kb
B22	MHC-DB	High	AQPVNVQQL	9		1	2	Q8CHI8	EP400_MOUSE	E1A-binding protein p400 (EC 3.6.4.-) (Domino homolog) (mDomino) (p400 kDa SWI2/SNF2-related protein)	Ep400 Kiaa1498	3072	996.547	31.25	High	0	0.001394	52.2	0.04	4673.3	6.5	H-2 Db
Y3	MHC-DB	High	RSLQFPEL	8		1	1	Q8CHI8	EP400_MOUSE	E1A-binding protein p400 (EC 3.6.4.-) (Domino homolog) (mDomino) (p400 kDa SWI2/SNF2-related protein)	Ep400 Kiaa1498	3072	989.542	10.67	High	0.003	0.003654	8416.9	2.5	15.3	0.05	H-2 Kb
Y3	MHC-DB	High	QIIAFFAHL	9		1	5	Q8CHI8	EP400_MOUSE	E1A-binding protein p400 (EC 3.6.4.-) (Domino homolog) (mDomino) (p400 kDa SWI2/SNF2-related protein)	Ep400 Kiaa1498	3072	1059.6	34.71	High	0	6.93e-13	13157.4	4	5.2	0.015	H-2 Kb
Y3	MHC-DB	Medium	ISPFNFTAIGG	11		1	1	Q8CHT0	AL4A1_MOUSE	Delta-1-pyrroline-5-carboxylate dehydrogenase, mitochondrial (P5C dehydrogenase) (EC 1.2.1.88) (Aldehyde dehydrogenase family 4 member A1) (L-glutamate gamma-semialdehyde dehydrogenase)	Aldh4a1	562	1123.58	17.03	Medium	0.011	0.02739	2843.1	0.8	1824.6	3	H-2 Db
B22	MHC-DB	High	ISPFNFTAI	9		1	3	Q8CHT0	AL4A1_MOUSE	Delta-1-pyrroline-5-carboxylate dehydrogenase, mitochondrial (P5C dehydrogenase) (EC 1.2.1.88) (Aldehyde dehydrogenase family 4 member A1) (L-glutamate gamma-semialdehyde dehydrogenase)	Aldh4a1	562	1009.54	40.75	High	0	1.836e-05	14.1	0.01	52.6	0.175	H-2 Db
Y3	MHC-DB	High	ISPFNFTAI	9		1	1	Q8CHT0	AL4A1_MOUSE	Delta-1-pyrroline-5-carboxylate dehydrogenase, mitochondrial (P5C dehydrogenase) (EC 1.2.1.88) (Aldehyde dehydrogenase family 4 member A1) (L-glutamate gamma-semialdehyde dehydrogenase)	Aldh4a1	562	1009.54	20.71	High	0.009	0.02739	14.1	0.01	52.6	0.175	H-2 Db
B22	MHC-DB	High	RVFQNEVLGTL	11		1	3	Q8CHW4	EI2BE_MOUSE	Translation initiation factor eIF-2B subunit epsilon (eIF-2B GDP-GTP exchange factor subunit epsilon)	Eif2b5	717	1275.71	36.62	High	0	8.26e-07	2782.2	0.8	6464	8.5	H-2 Db
Y3	MHC-DB	High	RQRENFPNL	9		1	1	Q8CI03	FWCH1_MOUSE	FLYWCH-type zinc finger-containing protein 1	Flywch1 Kiaa1552	673	1173.61	18.26	High	0	5.43e-13	9833.9	3	451.1	1	H-2 Kb
B22	MHC-DB	High	QNPTNAEVL	9		1	2	Q8CI43	MYL6B_MOUSE	Myosin light chain 6B (Smooth muscle and nonmuscle myosin light chain alkali 6B)	Myl6b	207	985.495	28.18	High	0	0.002049	489.9	0.25	11550.5	15	H-2 Db
B22	MHC-DB	High	MGVLNQAFDVL	11	1xOxidation [M1]	1	1	Q8CI75	DI3L2_MOUSE	DIS3-like exonuclease 2 (EC 3.1.13.-)	Dis3l2	870	1222.61	15.48	High	0.003	0.03829	782.8	0.3	16990.3	22	H-2 Db
Y3	MHC-DB	High	RSYSFQKV	8		1	1	Q8CI75	DI3L2_MOUSE	DIS3-like exonuclease 2 (EC 3.1.13.-)	Dis3l2	870	1014.54	11.44	High	0.006	0.02739	27255.1	12	6.4	0.015	H-2 Kb
Y3	MHC-DB	High	AYFTHSNL	8		1	2	Q8CIE6	COPA_MOUSE	Coatomer subunit alpha (Alpha-coat protein) (Alpha-COP) [Cleaved into: Xenin (Xenopsin-related peptide); Proxenin]	Copa	1224	952.452	21.94	High	0.003	0.003654	29603.8	14	44.4	0.15	H-2 Kb
B22	MHC-DB	High	FSQENTEKI	9		1	2	Q8CIG0	DEP1A_MOUSE	DEP domain-containing protein 1A	Depdc1a	804	1095.53	38.15	High	0	6.61e-07	162	0.09	13179.6	17	H-2 Db
B22	MHC-DB	High	SAPRDAYWI	9		1	3	Q8CII2	CD123_MOUSE	Cell division cycle protein 123 homolog	Cdc123	336	1078.53	32.11	High	0	0.001943	38.9	0.025	22280.2	31	H-2 Db
Y3	MHC-DB	High	NNYVYAGL	8		1	4	Q8CIK8	RFWD3_MOUSE	E3 ubiquitin-protein ligase RFWD3 (EC 6.3.2.-) (RING finger and WD repeat domain-containing protein 3) (RING finger protein 201)	Rfwd3 Rnf201	774	913.441	52.46	High	0	9.98e-16	37491.7	24	3.9	0.01	H-2 Kb
Y3	MHC-DB	High	TALAFRTL	8		1	1	Q8CIP4	MARK4_MOUSE	MAP/microtubule affinity-regulating kinase 4 (EC 2.7.11.1)	Mark4 Kiaa1860	752	892.525	20.11	High	0	9.63e-13	12521.7	3.5	13.3	0.04	H-2 Kb
B22	MHC-DB	High	GALAPNTSSL	10		1	1	Q8CJ26	NRADD_MOUSE	Death domain-containing membrane protein NRADD (Neurotrophin receptor homolog-2) (NRH2) (Neurotrophin receptor-alike death domain protein)	Nradd	228	930.489	18.37	High	0	0.003034	295.4	0.15	20042.2	27	H-2 Db
B22	MHC-DB	High	TSVENHEFL	9		1	4	Q8CJF7	ELYS_MOUSE	Protein ELYS (Embryonic large molecule derived from yolk sac) (Protein MEL-28) (Putative AT-hook-containing transcription factor 1)	Ahctf1 Elys	2243	1075.51	46.54	High	0	1.842e-06	10.8	0.01	1721.5	3	H-2 Db
Y3	MHC-DB	High	TSVENHEFL	9		1	2	Q8CJF7	ELYS_MOUSE	Protein ELYS (Embryonic large molecule derived from yolk sac) (Protein MEL-28) (Putative AT-hook-containing transcription factor 1)	Ahctf1 Elys	2243	1075.51	30.14	High	0.003	0.008678	10.8	0.01	1721.5	3	H-2 Db
Y3	MHC-DB	High	SAYRFSGV	8		1	2	Q8CJF7	ELYS_MOUSE	Protein ELYS (Embryonic large molecule derived from yolk sac) (Protein MEL-28) (Putative AT-hook-containing transcription factor 1)	Ahctf1 Elys	2243	886.442	39.67	High	0	1.514e-06	24758.8	9.5	2.5	0.01	H-2 Kb
B22	MHC-DB	High	FGIMVKDEM	9	2xOxidation [M4; M9]	1	1	Q8CJG0	AGO2_MOUSE	Protein argonaute-2 (Argonaute2) (mAgo2) (EC 3.1.26.n2) (Argonaute RISC catalytic component 2) (Eukaryotic translation initiation factor 2C 2) (eIF-2C 2) (eIF2C 2) (Piwi/argonaute family protein meIF2C2) (Protein slicer)	Ago2 Eif2c2 Kiaa4215	860	1101.5	15.22	High	0.006	0.05735	2467.2	0.7	13718.4	18	H-2 Db
Y3	MHC-DB	High	SNTMYARL	8		1	2	Q8JZN5	ACAD9_MOUSE	Acyl-CoA dehydrogenase family member 9, mitochondrial (ACAD-9) (EC 1.3.99.-)	Acad9	625	955.467	30.09	High	0.003	0.000932	32643.6	17	5.3	0.015	H-2 Kb
Y3	MHC-DB	High	ISVSFYHV	8		1	3	Q8JZQ9	EIF3B_MOUSE	Eukaryotic translation initiation factor 3 subunit B (eIF3b) (Eukaryotic translation initiation factor 3 subunit 9) (eIF-3-eta) (eIF3 p116)	Eif3b Eif3s9	803	951.493	35.51	High	0.002	0.000932	16259.9	5	6	0.015	H-2 Kb
Y3	MHC-DB	High	EAYRFTGL	8		1	2	Q8K015	CENPO_MOUSE	Centromere protein O (CENP-O)	Cenpo Mcm21r	298	956.484	13.97	High	0.004	0.02296	30017.9	14	7.6	0.02	H-2 Kb
B22	MHC-DB	High	VQIENTVL	8		1	1	Q8K0B2	LMBD1_MOUSE	Probable lysosomal cobalamin transporter (LMBR1 domain-containing protein 1) (Protein N90b)	Lmbrd1	537	915.515	22.91	High	0.005	0.0509	940.8	0.4	6689.7	9	H-2 Db
Y3	MHC-DB	High	KNIFYKAI	8		1	2	Q8K0C4	CP51A_MOUSE	Lanosterol 14-alpha demethylase (LDM) (EC 1.14.13.70) (CYPLI) (Cytochrome P450 51A1) (Cytochrome P450-14DM) (Cytochrome P45014DM) (Cytochrome P450LI) (Sterol 14-alpha demethylase)	Cyp51a1 Cyp51	503	996.588	18.63	High	0	1.18e-08	35054.2	20	450.2	1	H-2 Kb
Y3	MHC-DB	Medium	RSMKFATI	8		1	1	Q8K0S9	SNPC1_MOUSE	snRNA-activating protein complex subunit 1 (SNAPc subunit 1) (Small nuclear RNA-activating complex polypeptide 1) (snRNA-activating protein complex 43 kDa subunit) (SNAPc 43 kDa subunit)	Snapc1	389	953.524	13.22	Medium	0.012	0.02739	11462	3.5	17.1	0.05	H-2 Kb
Y3	MHC-DB	High	AAFVFRKL	8		1	3	Q8K0S9	SNPC1_MOUSE	snRNA-activating protein complex subunit 1 (SNAPc subunit 1) (Small nuclear RNA-activating complex polypeptide 1) (snRNA-activating protein complex 43 kDa subunit) (SNAPc 43 kDa subunit)	Snapc1	389	951.578	30.74	High	0.004	0.02296	15499.9	5	4.9	0.01	H-2 Kb
Y3	MHC-DB	High	SSLEFSQI	8		1	1	Q8K114	INT9_MOUSE	Integrator complex subunit 9 (Int9)	Ints9 D14Ertd231e	658	910.452	31.71	High	0	5.43e-11	15793.8	5	11.9	0.04	H-2 Kb
B22	MHC-DB	High	KAPWNWFLI	9		1	1	Q8K174	TMM60_MOUSE	Transmembrane protein 60	Tmem60	133	1174.64	16.37	High	0	0.001801	17	0.01	627.4	1.3	H-2 Db
B22	MHC-DB	High	MQHVLQRTI	9	1xOxidation [M1]	1	1	Q8K183	PDXK_MOUSE	Pyridoxal kinase (EC 2.7.1.35) (Pyridoxine kinase)	Pdxk Pkh	312	1141.61	13.84	High	0.008	0.06912	5365	1.4	7287.2	9.5	H-2 Db
Y3	MHC-DB	High	LVYKNFPQL	9		1	2	Q8K1A5	TM41B_MOUSE	Transmembrane protein 41B	Tmem41b D7Ertd743e Kiaa0033	291	1121.64	30.17	High	0	9.98e-16	1732.3	0.6	17.5	0.05	H-2 Kb
Y3	MHC-DB	High	ATYIFLQTF	9		1	5	Q8K1A5	TM41B_MOUSE	Transmembrane protein 41B	Tmem41b D7Ertd743e Kiaa0033	291	1103.58	46.05	High	0	9.98e-16	9044.6	2.5	39	0.125	H-2 Kb
Y3	MHC-DB	High	KTWRFSNM	8		1	3	Q8K1B8	URP2_MOUSE	Fermitin family homolog 3 (Kindlin-3) (Unc-112-related protein 2)	Fermt3 Kind3 Urp2	665	1069.52	26.91	High	0.003	0.000932	29910.6	14	6.1	0.015	H-2 Kb
Y3	MHC-DB	High	KTWRFSNM	8	1xOxidation [M8]	1	2	Q8K1B8	URP2_MOUSE	Fermitin family homolog 3 (Kindlin-3) (Unc-112-related protein 2)	Fermt3 Kind3 Urp2	665	1085.52	20.13	High	0.004	0.02296	29910.6	14	6.1	0.015	H-2 Kb
B22	MHC-DB	High	IGPNNGKNFF	10		1	1	Q8K203	NEIL3_MOUSE	Endonuclease 8-like 3 (EC 3.2.2.-) (EC 4.2.99.18) (DNA glycosylase FPG2) (DNA glycosylase/AP lyase Neil3) (Endonuclease VIII-like 3) (Nei-like protein 3)	Neil3	606	1107.56	17.67	High	0.001	0.009547	5271.6	1.4	25099.2	37	H-2 Db
Y3	MHC-DB	High	KQYEAARL	8		1	1	Q8K221	ARFP2_MOUSE	Arfaptin-2 (ADP-ribosylation factor-interacting protein 2)	Arfip2	341	978.537	12.2	High	0	1.13e-12	33912.3	18	58.4	0.175	H-2 Kb
B22	MHC-DB	High	KAIINIFFL	9		1	2	Q8K259	GIN1_MOUSE	Gypsy retrotransposon integrase-like protein 1 (GIN-1) (Zinc finger H2C2 domain-containing protein)	Gin1 Zh2c2	518	1078.67	39.13	High	0	4.595e-05	5.1	0.01	1636.5	3	H-2 Db
B22	MHC-DB	High	KSMQNHAAVF	10		1	2	Q8K2B3	SDHA_MOUSE	Succinate dehydrogenase [ubiquinone] flavoprotein subunit, mitochondrial (EC 1.3.5.1) (Flavoprotein subunit of complex II) (Fp)	Sdha	664	1132.56	31.22	High	0	0.0003722	376	0.175	3887.7	5.5	H-2 Db
B22	MHC-DB	High	KSMQNHAAVF	10	1xOxidation [M3]	1	1	Q8K2B3	SDHA_MOUSE	Succinate dehydrogenase [ubiquinone] flavoprotein subunit, mitochondrial (EC 1.3.5.1) (Flavoprotein subunit of complex II) (Fp)	Sdha	664	1148.55	15.36	High	0	0.003691	376	0.175	3887.7	5.5	H-2 Db
Y3	MHC-DB	High	YNFQYISL	8		1	1	Q8K2C8	GPAT4_MOUSE	Glycerol-3-phosphate acyltransferase 4 (GPAT4) (EC 2.3.1.15) (1-acylglycerol-3-phosphate O-acyltransferase 6) (1-AGP acyltransferase 6) (1-AGPAT 6) (Acyl-CoA:glycerol-3-phosphate acyltransferase 4) (Lysophosphatidic acid acyltransferase zeta) (LPAAT-zeta)	Gpat4 Agpat6	456	1047.51	17.9	High	0.006	0.02739	11058.6	3	7.8	0.02	H-2 Kb
Y3	MHC-DB	High	INQIYEARV	9		1	4	Q8K2H4	ACAP1_MOUSE	Arf-GAP with coiled-coil, ANK repeat and PH domain-containing protein 1 (Centaurin-beta-1) (Cnt-b1)	Acap1 Centb1 Kiaa0050	740	1105.6	47.03	High	0	2.72e-15	45804	60	44.6	0.15	H-2 Kb
B22	MHC-DB	High	YNVINREKL	9		1	2	Q8K2I1	FNTB_MOUSE	Protein farnesyltransferase subunit beta (FTase-beta) (EC 2.5.1.58) (CAAX farnesyltransferase subunit beta) (Ras proteins prenyltransferase subunit beta)	Fntb	437	1148.64	28.91	High	0	6.886e-06	101.5	0.06	4839.6	6.5	H-2 Db
Y3	MHC-DB	High	SSYKFNHL	8		1	4	Q8K2I1	FNTB_MOUSE	Protein farnesyltransferase subunit beta (FTase-beta) (EC 2.5.1.58) (CAAX farnesyltransferase subunit beta) (Ras proteins prenyltransferase subunit beta)	Fntb	437	995.495	29.49	High	0	2.75e-07	9856.6	3	2.3	0.01	H-2 Kb
B22	MHC-DB	High	SSPTNGMKTM	10		1	2	Q8K2I4	MANBA_MOUSE	Beta-mannosidase (EC 3.2.1.25) (Lysosomal beta A mannosidase) (Mannanase) (Mannase)	Manba Bmn	879	1053.47	38.51	High	0	1.633e-06	36.7	0.025	13561.9	18	H-2 Db
B22	MHC-DB	High	KSLENILTL	9		1	4	Q8K2I9	FBH1_MOUSE	F-box DNA helicase 1 (EC 3.6.4.12) (F-box only protein 18)	Fbxo18 Fbh1 Fbx18	1042	1030.61	39.55	High	0	1.063e-05	11.4	0.01	970.8	1.8	H-2 Db
Y3	MHC-DB	High	RGPTYVNM	8		1	3	Q8K2K6	AGFG1_MOUSE	Arf-GAP domain and FG repeat-containing protein 1 (HIV-1 Rev-binding protein homolog) (Nucleoporin-like protein RIP)	Agfg1 Hrb Rip	561	937.456	26.22	High	0	0.000932	32465	17	78.8	0.25	H-2 Kb
Y3	MHC-DB	High	RGPTYVNM	8	1xOxidation [M8]	1	1	Q8K2K6	AGFG1_MOUSE	Arf-GAP domain and FG repeat-containing protein 1 (HIV-1 Rev-binding protein homolog) (Nucleoporin-like protein RIP)	Agfg1 Hrb Rip	561	953.451	13.16	High	0.006	0.02739	32465	17	78.8	0.25	H-2 Kb
B22	MHC-DB	High	SVLFNLTTM	9		1	3	Q8K2L8	TPC12_MOUSE	Trafficking protein particle complex subunit 12 (Tetratricopeptide repeat protein 15) (TPR repeat protein 15)	Trappc12 Ttc15	797	1025.53	37.74	High	0	1.629e-06	20.1	0.015	438.7	1	H-2 Db
Y3	MHC-DB	High	VTHTFHQL	8		1	1	Q8K2M0	RM38_MOUSE	39S ribosomal protein L38, mitochondrial (L38mt) (MRP-L38)	Mrpl38	380	982.511	16.32	High	0.003	0.003981	25298.5	10	10.6	0.03	H-2 Kb
B22	MHC-DB	High	YGISNEKPEV	10		1	3	Q8K2T8	PAF1_MOUSE	RNA polymerase II-associated factor 1 homolog	Paf1	535	1135.56	54.07	High	0	2.544e-06	225	0.125	22739	32	H-2 Db
Y3	MHC-DB	High	QQFIYEKL	8		1	1	Q8K2V6	IPO11_MOUSE	Importin-11 (Imp11) (Ran-binding protein 11) (RanBP11)	Ipo11 Ranbp11	975	1068.57	10.47	High	0	5.271e-06	27318.5	12	114.5	0.3	H-2 Kb
Y3	MHC-DB	High	VSYVFTEV	8		1	1	Q8K2V6	IPO11_MOUSE	Importin-11 (Imp11) (Ran-binding protein 11) (RanBP11)	Ipo11 Ranbp11	975	943.477	20.08	High	0.002	0.000932	9532	2.5	2.4	0.01	H-2 Kb
Y3	MHC-DB	High	TIILFTKV	8		1	4	Q8K2V6	IPO11_MOUSE	Importin-11 (Imp11) (Ran-binding protein 11) (RanBP11)	Ipo11 Ranbp11	975	934.597	34.72	High	0.003	0.01059	30375.7	14	58.7	0.175	H-2 Kb
Y3	MHC-DB	High	VIAELVNV	8		1	3	Q8K2X8	TF2H5_MOUSE	General transcription factor IIH subunit 5 (General transcription factor IIH polypeptide 5) (TFB5 ortholog) (TFIIH basal transcription factor complex TTD-A subunit)	Gtf2h5 D17Wsu155e	71	856.514	35.83	High	0.005	0.02739	42721.1	38	1075.9	1.9	H-2 Kb
B22	MHC-DB	High	SAPTGSGKTL	10		1	3	Q8K301	DDX52_MOUSE	Probable ATP-dependent RNA helicase DDX52 (EC 3.6.4.13) (ATP-dependent RNA helicase ROK1-like) (DEAD box protein 52)	Ddx52 Rok1	598	918.489	48.72	High	0	7.23e-07	5416.4	1.4	18168.3	24	H-2 Db
Y3	MHC-DB	High	SAPTGSGKTL	10		1	1	Q8K301	DDX52_MOUSE	Probable ATP-dependent RNA helicase DDX52 (EC 3.6.4.13) (ATP-dependent RNA helicase ROK1-like) (DEAD box protein 52)	Ddx52 Rok1	598	918.489	24.47	High	0.003	0.005609	5416.4	1.4	18168.3	24	H-2 Db
Y3	MHC-DB	High	KNLRYQLL	8		1	3	Q8K310	MATR3_MOUSE	Matrin-3	Matr3	846	1047.63	24.93	High	0.002	0.000932	33749.7	18	13.6	0.04	H-2 Kb
Y3	MHC-DB	Medium	YSSSDREFL	9		1	2	Q8K341	ATAT_MOUSE	Alpha-tubulin N-acetyltransferase 1 (Alpha-TAT) (Alpha-TAT1) (TAT) (EC 2.3.1.108) (Acetyltransferase mec-17 homolog)	Atat1 Mec17	421	1103.5	21.64	Medium	0.016	0.09212	1464.3	0.5	26428.6	40	H-2 Db
B22	MHC-DB	High	SNLVNENTL	9		1	2	Q8K363	DDX18_MOUSE	ATP-dependent RNA helicase DDX18 (EC 3.6.4.13) (DEAD box protein 18)	Ddx18	660	1003.51	58.97	High	0	1.147e-06	59.3	0.04	1017.1	1.8	H-2 Db
Y3	MHC-DB	High	TNVEYAHL	8		1	2	Q8K370	ACD10_MOUSE	Acyl-CoA dehydrogenase family member 10 (ACAD-10) (EC 1.3.99.-)	Acad10	1069	946.463	27.93	High	0	5.51e-12	35809.4	21	6.6	0.02	H-2 Kb
Y3	MHC-DB	High	RGYEFLGV	8		1	2	Q8K3B1	FBSP1_MOUSE	F-box/SPRY domain-containing protein 1 (F-box only protein 45) (mFbxo45)	Fbxo45	286	940.489	18.51	High	0.003	0.003654	36655	23	15.9	0.05	H-2 Kb
Y3	MHC-DB	Medium	ITAWYIGF	8		1	1	Q8K3F6	KCNQ3_MOUSE	Potassium voltage-gated channel subfamily KQT member 3 (KQT-like 3) (Potassium channel subunit alpha KvLQT3) (Voltage-gated potassium channel subunit Kv7.3)	Kcnq3	873	970.503	12.64	Medium	0.012	0.02739	45492.9	55	411.6	0.9	H-2 Kb
B22	MHC-DB	High	TAISNYMNQL	10		1	3	Q8K3H0	DP13A_MOUSE	DCC-interacting protein 13-alpha (Dip13-alpha) (Adapter protein containing PH domain, PTB domain and leucine zipper motif 1)	Appl1 Dip13a Kiaa1428	707	1154.55	51.97	High	0	1.215e-06	79.5	0.05	167.8	0.5	H-2 Db
B22	MHC-DB	High	SSPKPNNSYM	10		1	3	Q8K3I9	GLCI1_MOUSE	Glucocorticoid-induced transcript 1 protein (Glucocorticoid-induced gene 18 protein) (Testhymin) (Thymocyte/spermatocyte selection protein 1)	Glcci1 Gig18 Tssn1	537	1124.5	24.31	High	0	0.0002189	64.1	0.04	14018.9	18	H-2 Db
B22	MHC-DB	High	SSPKPNNSYM	10	1xOxidation [M10]	1	2	Q8K3I9	GLCI1_MOUSE	Glucocorticoid-induced transcript 1 protein (Glucocorticoid-induced gene 18 protein) (Testhymin) (Thymocyte/spermatocyte selection protein 1)	Glcci1 Gig18 Tssn1	537	1140.5	16.59	High	0	0.004137	64.1	0.04	14018.9	18	H-2 Db
[truncated: 4,250 more rows]
